# Supplementary material for: Intact Drosophila central nervous system cellular quantitation reveals sexual dimorphism
Source: eLife. 2022 Jul 8;11:e74968. doi: 10.7554/eLife.74968 (PMC9270032; doi:10.7554/eLife.74968)
Supplement: Figure 1—source data 1. [file elife-74968-fig1-data1.xlsx]

## Sheet: Fig. 1
Fig.1
h.	Ddc>GAL4	Ddc>GAL4-manual	Trh>GAL4	Trh>GAL4-manual	TH>GAL4	TH>GAL4-manual
	345	342	189	189	100	96
	352	359	175	177	95	95
	334	330	177	177	96	97
	338	335	185	189	94	93
	330	338	169	172	90	93
	342	345
Number of values	6	6	5	5	5	5
Minimum	330	330	169	172	90	93
25% Percentile	333	333.8	172	174.5	92	93
Median	340	340	177	177	95	95
75% Percentile	346.8	348.5	187	189	98	96.5
Maximum	352	359	189	189	100	97
Mean	340.2	341.5	179	180.8	95	94.8
Std. Deviation	7.91	10.05	8	7.759	3.606	1.789
Std. Error of Mean	3.229	4.105	3.578	3.47	1.612	0.8
Lower 95% CI of mean	331.9	330.9	169.1	171.2	90.52	92.58
Upper 95% CI of mean	348.5	352.1	188.9	190.4	99.48	97.02
Sum	2041	2049	895	904	475	474
