# Supplementary material for: Intact Drosophila central nervous system cellular quantitation reveals sexual dimorphism
Source: eLife. 2022 Jul 8;11:e74968. doi: 10.7554/eLife.74968 (PMC9270032; doi:10.7554/eLife.74968)
Supplement: Figure 2—source data 1. [file elife-74968-fig2-data1.xlsx]

## Sheet: Fig. 2
Fig.2
f.	Brp>GAL4	Syt1>GAL4	nSyb>GAL4	Repo>GAL4				Table Analyzed	neuronal-statistics-female
	10425	9300	9807	3688				Data sets analyzed	A : Brp>GAL4	B : Syt1>GAL4	C : nSyb>GAL4
	10762	9831	9963	3957
	10795	10647	9927	4048				ANOVA summary
	10497	10745	9975	3798				F	7.096
	11166	9964	10181	3905				P value	0.0083
	11011			3722				P value summary	**
				3905				Significant diff. among means (P < 0.05)?	Yes
								R square	0.5219
Number of values	6	5	5	7
								Brown-Forsythe test
Minimum	10425	9300	9807	3688				F (DFn, DFd)	3.322 (2, 13)
25% Percentile	10479	9566	9867	3722				P value	0.0683
Median	10779	9964	9963	3905				P value summary	ns
75% Percentile	11050	10696	10078	3957				Are SDs significantly different (P < 0.05)?	No
Maximum	11166	10745	10181	4048
								Bartlett's test
Mean	10776	10097	9971	3860				Bartlett's statistic (corrected)	7.059
Std. Deviation	286	601.3	135.1	129.9				P value	0.0293
Std. Error of Mean	116.8	268.9	60.42	49.1				P value summary	*
								Are SDs significantly different (P < 0.05)?	Yes
Lower 95% CI of mean	10476	9351	9803	3740
Upper 95% CI of mean	11076	10844	10138	3981				ANOVA table	SS	DF	MS	F (DFn, DFd)	P value
								Treatment (between columns)	2104811	2	1052405	F (2, 13) = 7.096	P=0.0083
Sum	64656	50487	49853	27023				Residual (within columns)	1927992	13	148307
								Total	4032803	15
								Data summary
								Number of treatments (columns)	3
								Number of values (total)	16
								Number of families	1
								Number of comparisons per family	3
								Alpha	0.05
								Tukey's multiple comparisons test	Mean Diff.	95.00% CI of diff.	Significant?	Summary	Adjusted P Value
								Brp>GAL4 vs. Syt1>GAL4	678.6	62.87 to 1294	Yes	*	0.0306	A-B
								Brp>GAL4 vs. nSyb>GAL4	805.4	189.7 to 1421	Yes	*	0.0111	A-C
								Syt1>GAL4 vs. nSyb>GAL4	126.8	-516.3 to 769.9	No	ns	0.8627	B-C
								Test details	Mean 1	Mean 2	Mean Diff.	SE of diff.	n1	n2	q	DF
								Brp>GAL4 vs. Syt1>GAL4	10776	10097	678.6	233.2	6	5	4.115	13
								Brp>GAL4 vs. nSyb>GAL4	10776	9971	805.4	233.2	6	5	4.884	13
								Syt1>GAL4 vs. nSyb>GAL4	10097	9971	126.8	243.6	5	5	0.7362	13
