# Supplementary material for: Intact Drosophila central nervous system cellular quantitation reveals sexual dimorphism
Source: eLife. 2022 Jul 8;11:e74968. doi: 10.7554/eLife.74968 (PMC9270032; doi:10.7554/eLife.74968)
Supplement: Figure 3—source data 1. [file elife-74968-fig3-data1.xlsx]

## Sheet: Fig. 3
Fig.3
e.	Brp>GAL4	Syt1>GAL4	nSyb>GAL4	Repo>GAL4				Table Analyzed	neuronal-statistics-male
	10179	9131	9119	3927				Data sets analyzed	A : Brp>GAL4	B : Syt1>GAL4	C : nSyb>GAL4
	10190	9031	9534	4036
	9765	9381	8628	4072				ANOVA summary
	9863	9069	9967	4059				F	6.49
	9444	8449	9183	4091				P value	0.0123
				3903				P value summary	*
								Significant diff. among means (P < 0.05)?	Yes
								R square	0.5196
Number of values	5	5	5	6
								Brown-Forsythe test
Minimum	9444	8449	8628	3903				F (DFn, DFd)	0.4284 (2, 12)
25% Percentile	9605	8740	8874	3921				P value	0.6612
Median	9863	9069	9183	4048				P value summary	ns
75% Percentile	10185	9256	9751	4077				Are SDs significantly different (P < 0.05)?	No
Maximum	10190	9381	9967	4091
								Bartlett's test
Mean	9888	9012	9286	4015				Bartlett's statistic (corrected)	0.9404
Std. Deviation	311.8	343.1	499.2	79.61				P value	0.6249
Std. Error of Mean	139.4	153.4	223.2	32.5				P value summary	ns
								Are SDs significantly different (P < 0.05)?	No
Lower 95% CI of mean	9501	8586	8666	3931
Upper 95% CI of mean	10275	9438	9906	4098				ANOVA table	SS	DF	MS	F (DFn, DFd)	P value
								Treatment (between columns)	2008093	2	1004047	F (2, 12) = 6.49	P=0.0123
Sum	49441	45061	46431	24088				Residual (within columns)	1856402	12	154700
								Total	3864496	14
								Data summary
								Number of treatments (columns)	3
								Number of values (total)	15
								Number of families	1
								Number of comparisons per family	3
								Alpha	0.05
								Tukey's multiple comparisons test	Mean Diff.	95.00% CI of diff.	Significant?	Summary	Adjusted P Value
								Brp>GAL4 vs. Syt1>GAL4	876	212.4 to 1540	Yes	*	0.0109	A-B
								Brp>GAL4 vs. nSyb>GAL4	602	-61.65 to 1266	No	ns	0.0769	A-C
								Syt1>GAL4 vs. nSyb>GAL4	-274	-937.6 to 389.6	No	ns	0.5312	B-C
								Test details	Mean 1	Mean 2	Mean Diff.	SE of diff.	n1	n2	q	DF
								Brp>GAL4 vs. Syt1>GAL4	9888	9012	876	248.8	5	5	4.98	12
								Brp>GAL4 vs. nSyb>GAL4	9888	9286	602	248.8	5	5	3.422	12
								Syt1>GAL4 vs. nSyb>GAL4	9012	9286	-274	248.8	5	5	1.558	12
