# Supplementary material for: Intact Drosophila central nervous system cellular quantitation reveals sexual dimorphism
Source: eLife. 2022 Jul 8;11:e74968. doi: 10.7554/eLife.74968 (PMC9270032; doi:10.7554/eLife.74968)
Supplement: Figure 4—source data 1. [file elife-74968-fig4-data1.xlsx]

## Sheet: Fig. 4
Fig.4
e.	Sh>GAL4	Shal>GAL4	Shab>GAL4	Shaw>GAL4
	8421	8437	3244	1773
	8869	8243	3525	1898
	7674	8577	3018	1696
	8686	8120	3106	1711
	8540	7926	2841	1796
	7649		3095	1797
	8352		2979	1652
	7663		2667	1713
	8402		2819	1637
	7788		3273	1699
				1735
Number of values	10	5	10	11
Minimum	7649	7926	2667	1637
25% Percentile	7671	8023	2836	1696
Median	8377	8243	3057	1713
75% Percentile	8577	8507	3251	1796
Maximum	8869	8577	3525	1898
Mean	8204	8261	3057	1737
Std. Deviation	465.5	256.5	251.1	74.77
Std. Error of Mean	147.2	114.7	79.41	22.54
Lower 95% CI of mean	7871	7942	2877	1687
Upper 95% CI of mean	8537	8579	3236	1787
Sum	82044	41303	30567	19107
