# Supplementary material for: Intact Drosophila central nervous system cellular quantitation reveals sexual dimorphism
Source: eLife. 2022 Jul 8;11:e74968. doi: 10.7554/eLife.74968 (PMC9270032; doi:10.7554/eLife.74968)
Supplement: Supplementary file 1. [file elife-74968-supp1.xlsx]

## Sheet: BrpG4_female
BrpG4_2				BrpG4_3				BrpG4_4				BrpG4_5				BrpG4_6				BrpG4_7
X, Center of Geometry (µm)	Y, Center of Geometry (µm)	Z, Center of Geometry (µm)		X, Center of Geometry (µm)	Y, Center of Geometry (µm)	Z, Center of Geometry (µm)		X, Center of Geometry (µm)	Y, Center of Geometry (µm)	Z, Center of Geometry (µm)		X, Center of Geometry (µm)	Y, Center of Geometry (µm)	Z, Center of Geometry (µm)		X, Center of Geometry (µm)	Y, Center of Geometry (µm)	Z, Center of Geometry (µm)		X, Center of Geometry (µm)	Y, Center of Geometry (µm)	Z, Center of Geometry (µm)
366.194	29.0095	134.587		345.734	303.072	48.3073		384.129	40.2777	222.348		29.8152	315.356	86.188		358.846	304.24	28.3412		340.153	29.0563	173.961
347.399	11.7823	161.938		339.819	292.938	49.172		400.481	372.697	237.245		33.3175	308.519	91.9532		350.074	323.614	45.4761		344.077	26.3046	174.523
343.069	11.6464	141.913		345.256	298.729	48.5031		400.974	389.552	246.224		16.3416	302.116	73.287		343.08	338.916	35.2442		348.874	6.70366	210.006
339.92	12.3769	166.491		346.295	294.21	54.6359		399.947	367.593	228.314		24.3482	299.282	86.9248		346.957	312.826	35.8429		171.069	148.511	148.615
343.665	11.8559	149.149		362.439	294.319	61.8751		394.67	374.833	235.569		25.1323	321.354	73.2767		356.098	319.981	59.1952		172.37	154.368	159.961
343.449	11.036	168.423		367.89	293.064	69.8069		381.007	19.8094	189.19		35.6356	315.532	86.5315		362.078	296.116	48.3985		178.06	153.406	161.802
346.636	10.7595	169.934		354.561	293.576	39.9104		389.926	15.9244	188.935		26.1168	298.789	81.6067		339.839	336.596	36.3327		190.224	152.461	147.855
343.398	11.8329	153.701		344.007	293.134	40.2858		390.943	9.31179	170.88		26.0111	307.487	73.6063		368.099	296.72	50.1502		340.602	18.9132	221.886
354.444	5.50657	153.042		360.59	300.502	56.5984		385.456	25.0969	200.524		20.5362	304.799	81.0427		347.897	332.89	49.0569		347.761	15.3474	222.761
357.184	8.10429	171.393		368.999	297.263	56.6762		382.457	12.8873	174.179		30.8958	322.608	77.4908		364.09	302.597	66.5713		351.997	17.1196	226.884
357.363	5.17594	153.992		347.711	297.764	43.0629		395.466	23.4422	200.051		32.4168	313.372	80.7769		345.17	313.471	41.6568		341.409	24.4752	229.208
352.197	10.038	170.361		350.666	293.19	57.0211		366.072	25.1333	190.066		30.2039	303.455	92.9533		344.203	319.799	43.3455		340.019	26.4351	232.454
348.781	10.5754	155.26		173.153	136.35	38.6082		400.215	28.335	209.107		26.8042	316.347	78.2485		357.733	295.331	69.761		348.92	32.4888	240.968
346.15	12.7934	173.922		202.558	136.32	50.3215		384.831	15.7858	148.444		19.1605	312.23	74.417		184.195	140.754	225.066		338.756	41.9554	244.243
247.195	134.254	51.9873		200.301	125.952	61.5815		394.701	28.6934	209.682		27.1222	302.574	87.8716		197.154	141.022	235.933		365.448	342.877	223.268
223.176	119.584	52.3628		201.093	128.785	39.9614		377.676	13.7185	175.651		25.1254	309.94	83.8113		183.16	132.875	225.794		359.92	349.619	224.121
225.935	128.097	40.0479		197.757	131.43	61.6454		397.833	17.1386	190.064		35.0014	313.799	94.1481		192.536	133.208	229.952		368.102	335.215	254.528
232.452	135.243	43.7782		193.926	115.251	61.5145		390.182	25.4905	201.454		17.5441	297.556	78.9277		199.764	134.983	231.298		356.124	393.691	229.971
222.898	131.877	44.5438		178.536	129.448	61.0727		373.19	14.7738	178.073		29.4303	310.612	79.043		177.925	139.708	226.203		363.51	342.351	232.259
237.3	126.432	56.7663		179.576	139.988	52.3658		395.308	31.7077	212.649		34.4741	305.948	94.3395		197.277	126.392	247.62		368.811	344.346	217.604
249.619	129.927	52.9787		203.283	97.1482	63.1081		388.081	8.13531	155.37		21.5963	301.761	75.8889		191.537	129.886	224.772		361.903	353.623	217.908
221.787	133.491	52.2509		198.07	118.72	55.2994		392.991	13.4652	179.911		19.3276	306.008	75.3697		196.89	111.473	224.908		360.954	345.028	238.701
249.516	120.921	49.5006		201.196	137.462	43.2697		388.054	17.9083	191.481		23.4594	304.969	85.1121		348.962	20.634	80.034		352.382	337.633	245.005
213.135	134.159	61.4086		194.974	125.691	72.0693		374.355	31.4336	202.216		30.3149	312.818	91.1266		351.07	10.0501	104.989		336.515	321.47	220.059
236.276	134.304	58.8332		203.118	129.534	65.6119		373.19	10.3555	160.885		34.4676	300.06	96.1888		341.766	20.4089	82.5691		363.509	339.214	192.807
241.716	133.481	53.4756		201.176	110.639	66.6511		392.031	8.12861	161.143		31.9021	299.317	91.1912		357.831	18.9634	83.7669		369.555	323.122	181.628
243.018	124.897	45.0837		360.316	292.443	237.004		391.63	13.9812	183.683		323.687	12.5903	124.707		334.506	11.9221	116.076		345.86	345.663	160.255
223.988	125.156	57.9556		360.392	306.855	265.615		376.805	16.5579	183.408		327.184	13.4985	128.342		349.401	14.2573	88.8178		354.596	343.238	160.58
244.508	131.057	29.538		370.595	293.346	242.415		369.308	33.8208	203.416		318.795	19.4717	84.1092		352.939	8.31718	119.322		363.659	328.819	208.76
231.894	130.378	58.8381		365.62	311.991	256.201		394.062	18.6381	194.163		314.932	14.0882	86.4051		343.762	8.93761	121.584		342.644	330.996	160.791
218.773	120.186	58.1031		344.672	318.034	242.944		377.778	24.8733	195.255		318.363	12.067	89.0936		334.21	12.2403	122.565		369.828	358.831	210.704
199.592	122.497	59.4971		364.568	317.456	243.669		374.077	35.676	204.034		172.216	138.815	175.988		342.619	13.8397	94.907		356.857	340.315	202.849
237.523	133.355	31.3058		359.474	297.732	271.719		384.896	21.3166	195.221		182.655	142.773	146.712		342.582	9.36779	131.753		369.701	345.57	203.18
234.07	131.878	50.1836		357.077	303.131	259.051		385.548	9.03629	167.129		185.798	140.032	150.788		365.72	27.8836	132.363		360.766	355.061	210.943
211.347	114.178	40.6867		347.644	315.709	244.466		378.232	18.8405	185.33		187.119	141.195	170.101		344.02	12.3463	98.4668		365.157	321.672	187.725
231.856	135.359	62.05		361.714	322.253	238.786		388.054	28.5601	207.28		320.617	68.8928	43.1691		360.618	23.341	133.803		353.303	342.991	152.438
237.417	131.09	41.8264		354.852	295.041	274.405		369.172	38.2062	206.414		315.145	59.2314	64.4401		345.604	14.3626	100.451		362.903	320.524	145.414
212.51	111.064	53.1375		352.898	310.495	251.555		374.875	11.3843	168.401		343.301	298.246	57.1188		172.063	137.074	140.195		369.73	332.252	198.802
220.714	126.316	53.2386		356.801	317.975	245.673		366.735	21.8629	186.64		344.904	304.189	57.5875		187.951	138.867	131.009		371.044	324.169	204.758
246.941	135.632	34.3843		361.997	314.041	251.73		365.62	37.6428	206.859		323.868	317.42	62.5917		171.454	126.187	134.105		346.121	338.963	170.317
247.871	131.332	58.948		343.726	293.756	263.591		378.782	27.7093	199.728		342.167	320.203	58.1537		193.324	140.129	140.763		370.081	321.051	146.805
214.236	134.489	50.9228		342.67	323.905	231.2		367.871	323.667	189.806		346.178	332.837	61.5549		183.133	136.676	133.99		335.635	331.552	171.767
209.089	111.392	47.9219		369.818	300.42	265.052		380.678	348.546	150.35		347.64	309.47	46.4423		176.557	141.036	131.869		359.129	351.437	146.448
233.184	97.6345	51.4546		370.662	294.718	232.351		388.822	356.023	149.807		335.045	313.522	32.8249		197.274	139.099	136.979		370.543	324.171	189.919
228.976	134.062	48.3116		349.457	316.195	236.116		381.441	342.748	168.185		319.47	305.536	54.6676		175.849	141.58	137.256		339.608	326.245	155.378
222.294	135.65	38.4599		338.566	317.784	236.009		396.769	323.621	180.302		334.425	298.677	46.8575		194.43	135.558	132.605		347.882	348.134	155.455
223.258	114.736	48.4974		345.027	304.155	168.538		393.558	325.468	190.305		326.142	304.834	54.7044		168.303	130.944	138.657		367.003	351.517	205.309
216.32	110.433	48.0011		357.782	308.063	159.909		396.953	325.15	164.014		348.608	315.265	64.5294		177.613	133.55	142.121		355.018	347.289	147.362
229.616	120.589	43.5531		351.02	303.486	198.045		387.539	325.014	170.472		326.841	296.765	54.7408		175.324	134.197	135.044		339.248	340.422	201.357
189.918	127.142	138.382		335.533	323.058	219.931		390.087	323.059	164.339		318.865	334.819	64.0015		193.496	139.042	128.978		341.41	342.67	173.399
188.448	126.004	147.214		366.304	299.388	156.49		369.717	327.781	199.194		336.026	303.945	63.575		201.629	135.254	134.995		370.358	320.844	201.424
197.068	129.943	138.178		363.468	321.446	159.592		399.88	329.64	181.752		347.7	312.422	36.6048		182.212	137.952	143.645		357.069	322.889	30.2071
194.309	134.976	143.539		366.993	308.645	155.836		379.71	326.93	153.072		339.134	311.008	50.6217		177.585	126.619	133.137		365.528	323.772	59.6983
190.908	123.776	156.906		341.427	294.564	169.315		405.199	324.359	193.13		324.182	296.641	37.6645		203.027	127.727	142.429		341.314	326.64	60.1715
184.728	128.414	138.473		368.61	316.359	160.558		374.051	336.59	165.215		328.333	308.585	64.9582		181.85	130.653	130.361		341.347	325.726	44.3295
178.974	134.804	177.93		364.489	294.314	212.244		395.041	328.747	185.427		338.323	301.152	37.5906		362.986	293.737	103.356		351.746	330.441	60.5364
184.475	136.73	177.761		347.302	300.029	220.739		366.262	333.128	166.144		331.797	298.602	60.7766		345.534	305.217	120.626		362.683	329.097	31.3373
196.617	132.866	166.037		353.081	308.208	155.905		377.455	335.697	173.492		315.043	326.305	59.3463		364.606	327.529	129.404		345.708	323.595	60.6616
216.367	135.844	157.018		366.948	292.181	181.514		397.308	328.947	174.098		320.943	300.77	51.0672		344.548	313.879	103.488		363.723	326.104	38.6455
188.722	129.703	135.189		339.293	305.824	170.313		368.793	332.015	194.22		316.768	320.208	52.4007		352.452	312.475	131.766		362.867	323.591	44.9573
180.544	130.595	134.874		346.672	291.413	164.552		381.555	337.08	154.827		330.105	315.919	43.3702		346.844	302.353	131.546		366.892	332.717	39.2821
178.958	135.851	157.781		368.371	304.524	225.654		371.039	336.474	206.542		319.438	302.104	64.7152		358.063	309.426	140.851		346.195	324.723	65.7391
173.345	133.272	178.697		335.552	307.342	182.279		376.677	338.007	185.931		342.556	312.604	44.7181		356.471	300.279	141.256		354.276	327.627	50.3388
179.528	122.074	144.862		337.867	310.255	182.225		396.849	329.373	166.797		315.697	339.814	57.6347		370.482	331.709	123.758		369.975	325.178	25.5198
195.18	132.311	135.105		357.982	310.718	172.348		384.473	325.152	155.924		341.598	313.922	56.637		367.71	295.843	108.052		362.294	329.481	49.94
186.238	134.043	135.354		361.681	299.318	221.802		394.161	321.564	196.132		334.338	320.43	57.6391		335.997	308.346	132.372		358.487	327.327	55.9389
197.283	133.664	148.281		336.73	293.746	172.952		366.213	322.995	210.074		348.476	322.727	52.5812		362.572	296.807	125.03		357.679	323.317	41.137
171.713	134.516	158.567		341.078	297.268	164.253		385.155	333.04	148.581		328.925	299.567	225.707		367.068	293.543	85.2147		367.653	325.619	34.3711
196.54	128.029	152.977		351.452	309.259	172.802		399.838	323.083	196.371		345.692	296.245	213.78		360.112	322.237	134.062		361.434	325.505	26.6893
178.231	121.434	149.321		353.954	293.376	160.984		190.149	151.562	68.2022		319.532	297.495	215.502		353.851	312.584	110.952		367.597	328.707	47.4591
183.622	134.858	169.116		352.501	300.56	161.071		221.214	137.592	68.9983		326.512	298.235	217.258		357.934	298.304	136.339		363.823	323.176	51.9486
177.32	129.18	140.543		356.88	305.725	221.622		213.916	150.181	64.2454		332.446	307.355	239.669		337.761	310.188	111.559		358.653	332.06	47.7256
192.627	133.837	153.103		353.566	302.261	215.661		203.62	154.284	64.9642		338.929	328.852	156.048		337.971	312.368	94.5091		370.84	329.751	36.1867
176.018	135.02	140.317		342.784	296.843	154.671		204.498	131.033	58.6151		322.758	309.304	162.116		358.842	305.032	136.953		348.953	333.64	57.2354
171.515	125.277	169.701		353.343	294.97	216.954		196.519	145.525	68.0599		322.576	310.717	153.282		338.578	294.089	126.589		357.924	330.876	61.7958
180.159	125.396	135.924		353.491	293.899	192.572		215.973	151.334	58.4543		327.66	309.172	158.01		343.917	311.232	117.775		370.912	323.644	57.5523
223.874	132.33	149.427		352.12	312.359	166.093		222.813	139.263	66.5557		326.431	299.431	164.755		351.608	317.317	127.026		351.872	321.614	59.3857
215.186	132.437	140.751		355.616	293.475	155.038		212.543	153.81	59.318		346.31	300.777	165.554		345.725	308.122	101.581		355.199	334.782	53.3154
192.512	128.91	149.324		353.229	299.47	155.252		217.33	147.589	67.4396		344.234	317.431	153.702		354.633	303.335	232.442		343.151	327.149	48.7557
178.695	118.477	154.151		348.24	311.051	158.749		195.24	153.086	61.0429		319.098	308.16	158.303		350.911	315.648	229.935		345.392	337.532	53.4462
185.289	123.862	160.008		350.028	290.646	210.433		219.262	150.871	61.9092		324.073	316.877	148.472		347.877	297.655	240.539		367.962	323.613	41.98
181.255	126.275	141.887		371.018	291.236	210.414		390.121	333.586	41.0683		319.238	303.392	153.757		351.555	302.516	236.453		349.916	323.67	53.8478
195.585	136.699	171.482		360.55	290.08	194.148		389.427	366.115	53.3859		324.482	297.643	158.48		337.488	296.189	245.36		358.567	321.481	58.9237
175.704	124.54	149.898		362.736	306.922	118.127		370.577	337.447	31.1014		336.784	333.318	148.299		357.992	298.622	241.628		344.865	334.685	62.9943
195.166	136.841	160.196		364.88	292.972	132.715		402.513	325.544	36.1009		317.853	320.326	153.552		348.645	294.865	227.879		354.948	324.989	63.493
173.884	129.714	149.548		365.289	311.133	133.2		401.802	333.986	41.2959		335.658	310.023	187.385		355.444	313.439	224.232		365.315	325.912	28.8187
173.275	136.556	171.823		363.868	292.529	144.073		403.028	328.303	63.3914		327.532	311.836	148.945		357.865	300.552	237.143		371.318	331.081	87.8279
212.409	128.059	142.185		362.545	294.536	126.194		392.118	326.059	48.1594		339.293	314.469	159.332		361.65	294.703	233.795		365.198	322.927	87.6834
194.871	126.772	160.903		366.043	293.026	87.7238		366.912	336.582	55.1994		341.114	296.212	163.145		352.932	298.151	241.573		356.935	325.502	77.8233
204.842	137.194	153.321		358.909	301.946	125.306		372.183	336.33	54.1585		321.212	297.813	163.361		348.449	295.444	235.228		363.261	322.346	114.484
171.159	135.505	145.513		360.428	293.558	103.609		366.422	327.474	45.0328		320.467	304.186	162.885		351.745	303.272	228.519		370.591	327.377	77.7463
179.67	137.017	171.823		366.91	299.484	112.182		376.73	341.227	54.1336		333.429	340.438	149.079		367.801	302.857	229.458		367.542	343.767	139.408
195.687	124.579	141.554		369.427	298.971	118.52		383.462	340.226	63.4556		348.401	306.339	166.888		362.678	297.608	225.798		351.321	333.064	83.3033
216.101	131.291	145.93		368.73	299.315	82.0047		391.972	345.913	53.8908		327.177	318.079	154.901		346.792	302.605	229.591		364.833	327.577	92.9509
193.782	130.83	141.977		356.658	294.021	146.366		404.435	338.222	36.9613		327.789	302.314	159.419		363.35	301.571	234.301		370.799	322.417	115.303
181.028	125.136	151.13		358.235	296.698	97.6158		390.894	321.804	64.5015		327.735	331.186	143.452		368.881	294.743	248.323		369.852	335.991	78.1873
237.524	130.594	142.86		369.31	311.321	118.735		404.714	335.304	68.4935		348.953	323.846	150.232		338.331	298.31	238.549		367.141	331.886	127.201
190.835	135.591	137.008		362.312	305.013	146.319		366.531	324.119	63.847		335.332	295.884	193.194		355.2	322.867	232.058		366.685	334.796	84.4958
190.215	130.122	162.602		362.857	296.85	119.378		382.002	324.69	58.3077		339.169	308.857	193.278		340.847	307.718	229.37		345.525	326.466	93.6866
171.985	128.003	137.629		370.85	301.924	104.331		378.897	336.04	26.5603		319.453	303.347	178.488		345.591	301.695	235.335		370.058	322.879	84.2458
187.11	128.895	151.374		341.634	292.071	105.4		384.388	328.746	60.6034		336.81	309.952	160.687		336.223	298.516	231.817		337.249	323.077	84.0017
188.78	121.437	133.887		363.507	299.07	104.638		397.632	332.57	68.5473		338.667	316.64	167.267		363.065	297.883	239.89		354.647	333.587	79.0353
172.828	119.764	143.287		336.411	309.797	113.901		374.07	329.336	65.766		345.533	346.048	149.906		361.274	305.24	230.247		368.437	330.764	131.891
183.336	132.391	150.522		365.525	296.348	147.643		396.755	323.551	41.5332		348.85	314.593	161.368		369.034	297.026	243.585		352.052	323.571	94.2958
201.644	133.118	137.597		368.699	316.992	135.322		373.396	361.389	58.5167		345.311	340.384	145.83		367.387	293.609	238.42		368.128	321.781	109.766
182.329	126.442	146.434		340.751	291.873	90.5376		384.359	324.2	68.6201		343.521	308.853	161.534		352.836	307.332	225.89		347.262	332.337	78.8001
218.819	133.696	150.849		369.469	295.139	95.3385		377.811	337.628	63.8277		342.497	313.865	195.635		341.201	301.692	232.782		366.709	337.165	136.795
214.057	126.759	137.88		371.081	315.075	115.033		389.294	332.031	61.0445		322.696	307.85	146.284		343.301	300.846	239.544		351.887	329.653	89.5769
175.221	131.64	174.886		345.05	293.046	141.547		366.124	341.577	49.2226		346.879	318.114	181.892		357.89	299.155	229.735		349.921	323.347	89.9649
187.216	130.139	143.503		358.962	292.168	91.0282		375.771	321.495	28.6908		347.895	335.588	181.029		342.593	298.544	244.147		356.25	322.436	136.799
175.968	126.409	163.852		368.931	295.267	123.339		385.55	322.578	49.5153		345.329	327.801	155.843		341.618	298.828	227.036		345.613	321.145	80.1565
178.515	129.059	150.728		354.609	318.938	141.192		380.236	328.816	66.1441		332.824	301.883	161.834		18.3882	210.91	77.3839		361.483	324.216	85.868
224.723	135.386	143.59		338.495	292.03	100.115		403.751	322.828	61.4931		332.467	335.089	146.745		37.3633	198.721	93.0119		358.808	320.676	132.657
197.006	128.958	147.018		362.548	311.247	117.347		386.226	340.117	28.1636		328.682	305.529	165.143		33.6312	210.308	86.2997		336.171	326.956	90.4399
182.067	113.55	144.138		371.266	316.838	107.711		368.495	328.659	38.7945		342.151	337.091	163.544		35.0406	210.123	92.7342		351.546	326.346	81.0622
172.748	131.343	163.286		369.727	291.765	117.062		368.09	325.611	34.0716		348.163	321.322	162.109		22.3978	213.172	80.6436		338.643	330.176	86.5062
177.648	133.915	147.2		368.91	303.611	132.93		391.49	346.825	66.5887		325.143	304.215	152.79		37.9275	207.602	89.2287		366.693	327.903	113.402
176.43	114.134	144.054		369.961	294.561	137.723		391.48	360.661	66.1263		322.215	301.151	147.332		30.3482	190.875	86.6073		351.133	332.586	74.9519
204.652	135.778	134.482		37.0647	168.238	223.266		388.4	327.882	55.1966		335.512	297.203	162.263		32.4335	202.2	90.0902		366.226	324.724	104.938
180.98	137.354	134.234		37.058	158.525	224.091		389.35	339.392	46.6299		343.917	334.566	152.586		38.1603	181.618	89.7278		359.553	329.77	81.9333
397.269	285.241	30.6041		202.227	127.369	175.248		396.431	342.194	62.7479		32.3077	298.227	27.1921		20.8763	206.862	78.3185		370.814	334.994	133.833
397.001	293.186	59.0728		171.632	110.362	168.346		400.848	329.083	39.6268		13.2193	316.161	54.5596		37.984	180.322	78.9408		342.667	323.555	87.4258
387.426	300.324	49.0831		171.806	100.873	159.198		371.809	327.699	56.6773		17.6915	301.586	30.086		37.3166	185.87	87.7108		352.828	334.572	133.684
370.541	285.205	35.5792		175.565	115.98	189.15		386.597	342.256	55.0523		23.7778	298.222	21.6179		22.1322	202.438	79.4431		358.256	340.744	133.598
388.885	287.765	39.7999		174.988	103.107	165.823		387.192	325.513	44.2772		10.9509	314.421	41.7485		37.0157	178.583	84.632		346.88	329.311	87.1202
388.17	293.67	59.1581		186.054	116.997	162.185		403.506	344.498	64.6453		21.5945	321.875	38.8204		37.7783	203.505	90.9292		363.373	324.796	134.616
395.907	290.631	40.1964		203.387	119.84	156.752		383.123	344.957	59.4064		19.4955	314.943	44.6441		33.3478	188.754	84.1516		366.336	334.494	106.157
410.965	322.539	39.4294		179.893	111.376	192.602		368.504	334.708	46.7645		23.0088	324.036	42.1819		29.5571	195.912	84.3703		360.724	325.409	96.6298
381.935	287.212	59.0805		196.147	123.367	168.217		391.471	328.049	30.1065		15.6895	319.787	51.9456		32.6611	180.648	82.1671		342.516	328.752	81.913
397.706	300.387	49.5084		195.468	120.954	183.442		386.338	328.879	65.3981		24.1456	299.255	30.3089		37.4194	183.486	82.5259		357.32	325.031	91.5683
379.874	298.446	52.5344		183.858	120.838	189.238		396.26	367.849	50.377		34.9058	327.841	41.9644		30.9007	184.379	82.0209		363.007	321.209	125.159
402.65	292.491	31.825		170.742	96.1953	183.598		367.844	330.397	64.7114		34.4709	330.891	49.0373		26.8951	187.711	80.0567		362.025	345.449	134.878
371.342	296.371	32.0619		173.577	94.7479	159.693		401.746	331.144	47.6343		24.7691	328.675	52.074		34.0188	194.48	88.0089		192.456	148.589	67.7315
406.154	301.628	40.3208		191.333	112.112	166.772		382.532	334.743	62.7987		31.7673	316.857	37.0903		23.9179	209.027	81.8689		180.749	141.291	112.137
399.377	298.273	27.644		181.687	127.372	198.127		396.156	330.236	44.5283		19.6202	297.049	65.2924		21.2939	198.051	77.304		191.149	154.191	86.1799
399.08	290.302	36.1086		173.111	111.942	162.988		368.438	337.643	63.2484		23.4144	312.887	63.9677		29.3984	210.71	79.847		199.968	139.936	74.1202
371.918	290.844	40.6199		180.04	121.288	199.401		367.446	329.393	51.5556		27.6768	330.403	55.3258		27.0237	214.17	82.233		179.632	148.313	74.5142
373.37	296.437	40.5512		175.994	119.689	204.167		388.588	331.725	51.0283		8.02333	306.267	42.4526		27.8746	200.079	86.0604		200.038	141.882	114.453
387.14	293.41	28.093		172.486	100.28	176.392		378.437	329.398	53.8814		16.8851	308.453	30.3678		30.416	214.556	85.6787		199.899	149.227	75.3395
374.838	293.624	54.6752		174.128	101.164	184.336		389.398	337.334	53.5246		26.9776	304.917	22.0372		25.5263	195.663	80.4416		192.898	147.56	76.2293
351.172	284.883	42.3524		185.629	104.418	160.344		402.919	356.147	131.597		21.2719	310.611	27.0429		364.033	161.771	17.6769		196.251	150.132	138.515
400.782	287.595	42.4737		202.069	111.065	168.777		386.866	343.443	115.097		20.638	326.133	52.6727		357.001	151.767	66.1414		200.372	140.556	104.749
378.788	287.828	43.0328		201.81	121.492	162.411		402.386	345.448	114.995		17.2549	310.304	54.8125		369.183	159.687	66.4558		205.297	138.767	105.494
377.623	288.837	57.4733		172.6	104.424	171.817		375.798	327.491	85.0463		18.9087	300.96	59.508		341.262	153.329	36.5639		187.417	145.707	78.1157
371.2	289.755	52.711		175.852	90.2685	167.55		405.234	350.509	111.623		22.758	308.011	65.317		363.579	162.706	57.6434		205.361	153.091	78.1888
392.446	289.535	55.1		175.613	106.386	160.07		384.905	334.701	81.5791		30.5586	320.957	59.5705		366.208	150.406	68.2082		203.309	155.162	91.2315
344.517	286.17	50.2294		187.028	114.259	168.223		390.893	335.69	77.4776		10.8141	312.095	48.9964		342.06	161.373	59.6432		171.435	153.174	116.504
376.889	289.169	47.7729		181.388	95.7701	167.345		393.723	332.385	115.446		31.3561	323.789	39.9982		367.417	306.776	162.115		169.889	145.704	139.231
397.892	295.922	32.8848		172.367	103.287	190.338		388.063	330.533	119.833		31.3726	311.515	27.5246		363.307	324.387	209.915		199.812	149.084	108.123
409.27	307.22	36.4687		176.586	125.09	205.117		395.696	331.036	91.2029		34.1753	306.552	23.5561		345.289	293.901	169.955		196.067	154.005	81.8844
343.108	285.109	44.1101		203.083	113.407	163.116		392.401	352.801	104.172		14.2974	309.599	42.6576		360.971	312.599	213.119		191.134	151.04	127.311
367.842	285.353	47.4148		177.153	105.985	190.384		384.602	321.32	91.8492		22.2435	304.327	39.1222		361.226	301.116	162.117		202.873	153.437	98.147
357.231	286.624	32.7546		200.961	122.119	176.377		388.441	350.833	86.272		15.9995	299.691	34.4597		366.669	302.607	203.432		171.005	150.814	110.836
372.659	287.209	44.1773		191.962	124.108	187.101		389.466	359.726	112.315		31.5817	322.893	34.465		370.034	294.88	203.393		175.397	148.157	135.556
416.514	288.285	43.0327		176.567	115.033	199.919		380.618	327.367	120.309		27.023	309.665	23.5726		365.429	307.97	184.324		202.663	151.882	84.3873
386.956	286.002	61.4872		178.074	112.592	155.383		383.031	327.59	135.179		33.5358	322.948	50.2457		352.616	303.832	212.668		194.272	138.765	100.646
403.336	296.011	55.779		169.214	105.454	178.553		375.988	331.946	116.375		17.1957	320.975	37.8053		369.937	301.974	184.822		201.199	152.209	128.294
394.186	287.672	45.1492		192.112	119.008	169.84		395.548	325.403	91.9226		17.294	304.68	38.2191		367.526	308.217	178.791		24.6165	232.121	209.389
397.608	297.718	43.1201		172.16	94.8943	167.587		375.309	327.314	92.3127		32.7998	328.333	53.7093		363.639	295.211	203.869		35.1918	227.514	197.58
390.167	292.26	35.1796		181.743	117.362	156.974		374.006	321.11	86.2818		30.7087	314.307	50.6701		336.609	296.659	189.899		24.6422	233.227	204.104
398.318	293.951	47.9623		183.175	106.048	176.392		365.922	347.844	112.442		25.1853	319.006	47.0325		345.951	302.471	213.54		33.7392	218.91	198.241
342.197	290.085	55.624		184.818	111.448	184.749		367.86	330.375	92.4494		8.65877	296.899	61.9681		355.899	309.148	207.398		30.6358	228.653	198.684
394.435	297.216	55.721		170.726	106.141	155.603		399.452	369.124	112.728		31.7062	325.386	57.5165		350.847	295.263	164.464		28.4502	234.696	199.037
393.54	285.7	36.7511		191.449	117.099	185.342		383.653	324.878	78.9548		20.1639	305.714	24.7204		354.157	300.125	154.956		36.7802	227.828	191.462
358.72	287.491	37.3855		197.364	120.405	163.725		401.28	330.343	98.3433		10.816	304.457	38.0614		349.547	295.398	155.206		27.5048	228.372	205.453
365.272	286.093	31.4246		185.544	112.483	180.8		384.762	328.841	142.632		28.8488	330.714	62.3347		345.827	303.207	172.764		33.7176	215.673	205.84
354.645	285.918	58.6886		171.195	117.142	205.709		365.693	339.078	80.1613		20.3661	318.54	47.9613		361.899	318.69	192.722		37.3283	222.462	195.567
409.355	298.352	43.5545		189.4	114.707	180.997		368.487	323.06	108.626		15.7109	320.514	44.0982		360.555	297.603	198.049		33.6975	231.258	194.682
386.701	288.829	45.13		168.895	100.812	170.158		383.73	325.75	122.362		28.3357	324.533	51.1515		342.962	296.311	173.633		31.739	224.213	201.578
409.311	297.945	214.315		197.369	117.761	178.65		400.328	354.865	136.184		16.3211	298.153	25.3645		341.12	308.736	194.727		31.6041	232.758	208.299
416.855	284.941	205.711		175.501	87.6169	156.317		386.594	341.465	79.9546		24.6952	328.751	47.4816		348.761	295.886	211.31		32.2235	229.291	203.266
416.609	320.482	199.762		197.54	131.919	184.554		400.665	328.597	76.008		24.9121	327.799	62.5244		361.184	298.572	208.781		37.2268	212.039	203.478
367.34	314.609	237.125		177.725	98.7035	179.786		374.635	321.988	76.8148		21.9375	307.677	31.8748		359.627	308.017	179.694		37.9053	224.308	203.355
361.898	307.809	206.019		190.157	90.4253	156.38		387.181	337.416	113.707		12.8655	302.252	63.4928		364.358	305.663	173.622		37.4603	214.971	210.21
417.406	301.504	219.882		187.209	116.184	187.811		392.475	349.525	125.334		6.22322	297.683	51.5252		368.592	300.218	164.848		30.8644	216.945	209.515
409.274	293.966	204.132		187.759	111.923	174.507		367.433	342.689	84.0678		20.2491	326.11	47.6269		369.5	295.096	191.307		16.4815	231.677	227.997
411.208	331.357	205.836		186.252	110.053	170.257		370.332	330.175	100.975		26.8126	303.383	36.3479		336.793	295.787	196.263		35.4502	225.895	241.06
353.114	319.426	209.939		194.36	108.71	168.846		382.633	323.99	84.0867		35.701	319.593	29.3362		365.38	301.184	195.947		20.4041	226.862	220.101
415.528	320.483	209.757		174.586	115.149	174.345		369.104	323.612	80.5381		12.5276	308.748	35.9884		356.999	299.118	191.549		18.3264	234.715	241.523
395.488	338.938	205.699		180.29	106.171	185.632		397.866	331.607	84.0846		27.1119	318.408	51.8606		359.854	314.955	187.793		37.3171	223.897	235.785
418.28	320.395	213.58		172.441	91.7569	174.356		382.75	360.609	113.519		22.7804	307.784	57.9821		364.6	303.318	211.651		35.8221	225.926	245.912
350.208	318.967	199.412		181.182	111.856	176.862		400.831	351.682	107.369		27.3033	309.19	32.6961		352.112	300.526	217.412		23.5715	223.29	222.593
383.922	342.298	202.17		200.117	127.233	179.609		391.145	324.278	77.2023		9.74115	299.377	39.1047		356.63	302.876	166.713		20.8583	232.836	246.351
412.566	300.25	241.485		195.177	113.03	176.987		371.114	333.383	80.5147		321.037	176.517	52.7042		363.995	297.126	191.994		17.7879	232.376	222.64
406.694	299.188	231.407		178.778	127.748	201.651		403.922	354.741	83.3436		341.184	152.54	53.7016		345.863	296.837	181.875		28.6601	218.567	223.031
390.827	312.96	218.088		170.184	109.505	201.401		390.154	325.024	114.052		338.592	160.642	55.2123		350.378	299.807	168.126		27.6036	227.551	236.265
406.523	292.887	239.066		171.37	97.2219	154.615		393.2	340.081	114.3		330.748	157.352	58.0509		355.135	300.034	202.037		23.5433	229.789	242.709
364.297	327.982	206.333		169.477	101.367	194.868		380.563	323.088	137.895		321.878	150.859	62.7705		355.214	298.723	209.964		29.9127	228.507	242.949
404.701	336.504	203.272		183.7	111.247	189.062		369.136	327.741	107.297		161.139	249.583	65.1384		339.415	317.062	202.418		27.6354	229.685	247.644
343.014	332.547	199.448		170.097	112.762	185.744		386.799	328.154	88.4263		336.54	298.109	84.7055		340.53	302.963	182.377		28.1425	220.369	230.574
385.245	331.45	209.823		189.957	101.598	156.528		395.107	328.886	76.876		324.947	300.274	126.818		342.268	294.549	214.517		25.2648	224.49	243.264
416.031	309.914	226.75		176.782	97.7608	165.105		392.999	353.998	129.627		324.665	328.56	126.25		357.903	306.106	211.715		31.0717	221.825	237.715
396.239	334.293	210.844		171.202	106.128	161.271		381.582	337.693	117.738		335.806	334.238	72.002		355.616	315.538	209.356		19.1582	228.558	231.685
393.454	340.231	201.072		169.546	114.075	158.424		385.632	330.56	84.7939		332.418	305.01	73.3222		365.253	317.938	177.34		23.9449	222.896	238.111
362.222	295.423	214.512		176.21	103.535	156.202		388.891	343.641	138.995		345.912	315.593	73.2817		367.437	312.519	160.136		36.1527	219.917	231.13
384.501	308.082	202.28		188.193	104.697	167.748		372.407	330.951	110.714		346.928	303.677	73.4909		334.771	302.479	210.023		26.0775	223.809	217.713
404.442	295.816	200.649		196.562	115.03	167.383		375.254	338.62	107.726		329.976	330.987	129.616		367.282	322.164	197.454		31.3518	220.393	217.112
374.615	307.339	213.253		185.369	108.447	182.236		377.88	333.16	138.944		325.467	301.381	112.744		338.704	302.589	188.877		23.0967	229.542	226.133
371.817	300.478	200.742		180.184	87.1619	159.047		396.91	327.426	111.295		325.182	298.737	86.3487		369.823	294.474	198.248		33.9387	213.917	226.239
408.259	322.735	213.439		180.56	115.714	186.181		392.119	322.255	88.7397		333.954	323.075	73.4149		338.718	294.393	203.09		29.339	234.585	227.285
405.55	289.183	241.013		184.258	89.6209	156.735		400.978	357.65	96.5052		343.2	318.013	76.8034		350.752	301.142	205.394		32.4293	214.553	219
403.528	291.855	233.537		191.322	109.479	180.644		40.4791	171.034	205.962		334.946	297.651	89.6459		340.614	302.108	210.218		17.2173	230.083	240.583
381.182	312.399	257.748		170.952	100.78	165.323		38.4769	177.971	205.886		335.479	297.642	78.6061		344.93	314.245	197.439		22.9253	224.589	233.285
345.44	318.836	203.48		185.251	109.618	154.799		35.3055	185.46	212.231		323.132	328.691	131.95		333.995	161.476	162.559		370.312	162.119	220.656
340.582	322.337	204.19		171.464	123.76	208.757		30.5072	174.706	212.967		314.893	324.14	118.315		340.967	173.691	152.295		360.176	184.221	247.353
410.184	299.841	226.254		172.342	110.804	175.106		32.9326	180.38	212.956		330.527	300.054	81.8785		341.8	149.429	174.458		338.515	169.129	248.029
413.51	304.108	222.96		188.532	121.747	189.124		39.398	191.153	212.955		321.255	298.296	123.608		339.14	168.354	154.923		340.581	163.1	117.094
375.96	307.757	220.457		173.85	109.84	191.81		28.0537	167.351	213.224		319.881	324.204	123.946		339.035	177.709	155.406		342.182	161.852	125.673
386.221	299.275	207.672		183.519	117.027	192.348		34.8423	177.125	207.854		329.426	300.778	103.116		189.645	130.137	209.988		196.353	273.815	48.6446
390.633	332.345	209.877		189.007	98.615	168.478		36.8783	164.822	209.34		329.878	307.383	83.04		174.327	137.729	151.56		187.97	278.155	53.4901
415.864	305.318	215.107		345.304	149.405	258.935		40.0745	187.186	208.74		330.926	298.27	76.8001		181.726	138.059	210.144		191.368	300.23	62.5105
417.161	313.66	225.798		366.04	174.765	243.779		37.9551	182.329	208.995		341.488	307.559	76.5484		189.07	140.685	210.116		174.981	285.649	63.691
414.37	292.392	215.036		369.564	168.658	253.233		33.6217	169.021	210.214		175.118	274.413	82.4928		169.984	131.979	159.604		178.289	259.549	62.9521
413.747	313.484	242.014		347.687	156.084	118.389		32.3241	162.689	211.793		162.115	255.745	72.9886		188.587	135.619	184.162		201.365	286.229	64.8571
398.528	309.95	210.972		338.08	158.807	99.3625		400.577	168.508	224.78		176.522	248.757	84.3295		174.109	130.722	166.134		195.365	242.708	59.9408
413.912	312.564	231.637		337.556	157.489	118.588		367.104	177.333	246.225		188.15	266.877	96.0144		189.448	139.689	203.295		191.079	282.296	60.6196
418.784	314.51	201.13		353.344	147.241	118.752		203.886	276.418	69.4846		171.694	247.02	76.647		180.141	132.876	156.727		191.652	296.427	60.0002
412.097	287.685	234.497		338.773	158.27	106.444		213.615	271.259	36.7499		178.108	267.303	85.4433		203.806	124.728	211.379		182.759	284.111	60.4889
407.432	335.403	200.763		362.268	153.691	86.0405		218.601	270.933	67.7644		190.877	258.288	98.0051		190.582	128.423	176.347		198.649	262.822	65.1919
418.163	298.723	215.488		358.644	155.923	86.0512		209.298	276.251	39.7991		170.489	252.713	79.5862		185.142	128.973	167.27		196.062	266.675	61.0037
414.894	288.97	248.881		344.757	153.246	100.975		223.031	268.211	41.7173		169.312	267.41	79.766		203.532	135.285	151.997		198.371	279.97	67.0918
362.322	319.683	215.918		345.511	152.195	93.9264		200.081	277.592	67.0556		160.691	260.193	81.2458		175.464	122.044	167.114		197.068	277.348	61.8087
382.989	290.068	201.051		341.42	151.116	120.206		217.204	261.225	60.4371		190.029	235.294	91.8913		196.943	111.405	192.424		193.085	261.311	66.1177
410.784	296.98	209.332		358.63	147.91	120.309		203.077	260.393	55.2197		182.695	242.151	92.0635		180.151	120.35	176.686		365.716	172.751	198.499
373.24	321.438	226.997		358.232	150.734	108.516		205.171	261.315	67.5645		325.326	149.697	179.629		185.698	132.356	204.64		357.243	178.639	172.575
362.744	323.904	204.264		363.324	151.589	102.717		195.602	250.52	61.2621		336.528	150.368	187.078		190.427	124.35	192.597		353.21	172.484	184.902
371.727	284.604	244.836		349.488	154.592	102.727		196.087	245.949	45.5757		322.711	161.227	186.683		185.968	132.596	151.996		362.597	178.13	184.873
393.291	294.429	200.778		361.153	155.929	78.6119		191.924	255.491	45.6455		338.492	156.308	180.525		171.468	111.471	176.784		363.419	182.904	192.414
406.878	288.93	247.244		362.363	153.026	95.5255		208.841	262.684	56.7476		341.917	168.886	203.687		183.719	127.588	177.005		339.151	169.356	193.441
406.453	296.585	218.023		349.237	150.458	88.7974		211.063	252.547	59.9527		322.751	155.957	180.735		173.104	132.347	176.37		346.368	170.013	164.169
393.619	304.247	208.657		344.09	147.495	88.824		189.208	262.903	46.8197		324.238	151.859	167.33		168.8	136.446	160.895		369.571	165.106	164.77
401.627	295.208	224.653		345.003	157.249	124.179		209.589	277.989	68.931		321.545	161.002	166.856		189.762	132.891	167.874		366.333	177.09	193.05
404.545	298.638	225.958		367.102	149.488	96.7167		207.825	282.865	69.1093		330.976	153.862	187.349		187.278	125.661	156.541		349.453	171.228	156.417
393.637	312.914	216.953		350.442	154.624	96.6112		207.264	292.341	50.4778		335.207	167.609	192.745		203.026	131.67	212.477		371.997	176.998	193.173
398.71	318.163	227.608		344.076	153.803	129.158		206.8	270.676	56.8873		325.495	155.363	186.805		200.549	127.304	193.107		362.783	178.119	164.512
381.282	332.358	205.313		358.702	147.588	97.576		195.018	263.189	49.4956		347.689	170.433	203.84		192.414	135.189	193.126		366.683	171.25	164.925
419.641	296.937	234.31		345.977	153.173	83.0723		222.875	271.813	58.0158		323.506	156.363	200.294		184.548	135.893	178.041		354.872	175.319	146.592
405.208	291.227	216.872		336.073	149.756	89.5346		206.612	268.694	50.0835		330.744	161.651	196.903		170.78	140.971	157.761		353.079	191.34	146.148
407.965	288.518	205.439		351.699	148.242	112.609		217.172	284.062	65.4395		335.658	165.968	200.781		181.934	136.866	168.771		365.482	168.098	186.141
410.983	288.769	221.328		354.668	152.682	97.6235		205.589	253.768	61.8042		334.566	157.626	169.103		176.526	133.705	205.487		360.267	172.676	164.665
368.706	304.384	205.803		345.013	150.642	112.771		220.793	254.817	66.1802		334.418	149.51	181.399		202.244	126.495	161.98		345.971	161.78	158.186
409.448	304.401	235.651		368.548	156.177	83.8085		200.804	248.242	65.98		323.906	159.135	174.628		185.503	126.905	162.01		361.304	167.874	157.292
370.089	302.14	212.538		365.787	148.114	83.972		221.695	278.869	59.1466		331.983	150.478	193.154		202.943	142.469	212.642		339.151	165.886	186.684
369.925	310.055	202.363		367.988	153.194	90.8168		214.363	281.39	68.6877		339.251	163.032	197.117		174.786	137.692	198.526		366.709	179.873	202.068
414.894	296.488	246.416		345.486	154.849	137.766		216.391	276.015	59.019		318.896	157.734	169.354		188.832	121.069	152.963		371.761	177.098	180.965
406.335	288.339	213.933		362.145	149.406	90.7652		201.117	267.197	51.6819		315.632	152.218	182.453		189.38	132.68	198.65		364.926	172.347	181.099
417.227	287.664	238.874		356.995	150.506	114.634		206.884	260.08	61.7188		340.382	156.606	169.935		185.788	123.861	186.612		355.478	169.854	157.41
411.153	288.623	210.966		337.152	152.105	114.867		201.297	261.328	62.1507		335.595	156.884	198.092		194.591	123.694	187.566		358.66	183.201	147.654
367.316	288.433	211.684		347.635	147.429	142.214		221.32	249.305	59.8336		336.252	152.836	161.853		169.904	120.043	168.74		341.236	170.683	166.973
381.808	297.585	206.159		354.197	149.83	105.367		200.121	268.576	58.8767		337.098	151.956	201.947		194.947	135.519	207.446		351.031	167.525	188.622
411.333	304.261	229.887		354.056	149.24	91.8469		213.029	247.451	53.9569		324.91	162.612	198.085		179.672	125.685	162.55		362.713	163.832	166.917
391.737	311.019	248.022		337.768	147.489	105.727		203.315	281.842	63.0273		322.181	154.014	175.894		182.83	122.062	215.388		367.058	186.939	194.934
366.252	294.196	199.904		352.041	146.053	146.409		215.121	270.592	53.7497		318.734	157.867	162.036		191.954	135.428	214.147		368.175	163.027	182.353
361.486	295.571	199.374		348.435	155.479	147.47		197.735	275.602	69.0724		326.301	150.172	194.164		174.843	126.965	158.927		353.595	169.542	203.57
383.467	299.756	199.637		175.429	243.016	72.2354		19.4038	178.917	249.049		317.537	159.207	202.425		183.977	138.634	159.073		357.912	172.256	182.086
378.49	311.807	248.501		182.631	251.204	54.3145		24.984	172.161	267.031		325.248	158.369	203.72		167.962	136.976	169.729		362.603	189.163	148.319
413.698	294.147	248.478		203.82	281.4	68.2305		36.9587	178.54	264.597		331.876	159.931	202.866		175.864	138.223	188.106		371.926	182.846	189.698
406.89	328.861	208.762		174.24	226.606	70.4065		16.0097	171.545	257.24		318.259	158.295	185.155		189.655	119.996	187.741		344.458	173.715	158.455
231.114	95.4782	100.397		201.34	229.555	63.5119		29.6358	180.246	264.121		320.038	152.895	202.56		197.058	118.144	215.466		357.917	173.458	189.994
235.377	119.905	96.6118		176.611	242.132	67.5548		26.937	178.535	253.695		345.462	149.89	199.459		180.576	133.338	163.541		367.46	200.871	148.313
215.853	132.534	85.6072		192.17	255.782	49.913		30.8133	189.857	249.08		335.791	158.115	164.028		181.679	134.821	207.475		343.297	171.719	206.048
237.495	113.413	74.9264		193.547	234.087	53.549		39.575	164.922	272.732		327.665	156.928	194.878		197.758	137.713	215.198		370.849	170.247	190.388
196.738	126.782	125.036		198.293	238.626	58.6755		25.228	169.589	259.833		321.736	157.578	194.895		185.818	133.049	172.349		349.749	165.986	168.244
203.236	126.409	120.024		186.599	235.718	71.858		25.6606	174.585	234.588		320.715	151.296	191.442		174.914	135.725	159.443		367.976	181.99	196.056
184.266	135.094	124.053		199.274	265.125	72.8951		18.1701	171.638	230.529		343.204	154.351	191.424		180.531	123.145	207.559		353.1	169.534	150.871
223.157	104.937	96.5926		191.488	268.9	72.2153		21.8728	183.134	244.323		344.67	152.885	172.926		170.345	127.022	154.486		360.731	169.999	169.285
217.985	131.25	79.3038		193.391	223.938	50.5721		41.4579	205.148	238.242		329.438	149.305	203.122		179.742	125.545	173.083		350.745	167.792	197.274
222.432	99.4702	75.6088		190.223	245.151	68.7322		38.726	168.143	266.994		336.304	152.089	173.113		200.116	125.398	199.818		366.713	170.133	171.671
228.271	113.32	79.784		201.624	238.144	71.9689		11.0172	162.693	241.016		338.472	150.51	165.903		177.656	136.491	215.456		351.365	161.244	191.354
202.469	115.412	124.025		194.025	245.914	49.9155		31.1739	179.179	238.425		328.559	152.97	173.279		188.472	122.374	179.516		352.567	172.847	162.393
220.652	108.946	74.4766		192.384	260.22	70.925		25.5845	170.209	230.938		189.884	239.819	218.797		191.655	111.814	189.144		361.622	178.539	191.31
202.332	136.651	96.4768		173.697	232.303	58.5795		23.9999	179.081	228.156		165.141	285.388	215.462		201.901	119.996	195.775		358.624	165.557	162.234
206.815	112.303	114.38		182.424	264.972	71.2994		23.771	169.726	221.135		178.386	286.524	223.527		198.093	138.948	200.283		362.228	190.079	198.184
247.389	121.802	92.1374		199.224	262.856	68.0818		26.8778	184.719	228.126		184.366	264.816	217.188		192.54	135.116	163.746		352.618	165.164	155.38
190.222	133.767	124.819		181.362	245.5	44.7279		25.83	183.041	235.151		191.047	267.559	216.914		203.609	127.281	173.694		366.638	189.514	155.607
241.773	120.202	86.3872		200.345	256.203	54.6365		26.631	178.36	221.709		192.075	271.389	236.769		180.271	134.011	194.936		351.208	194.852	12.8278
197.651	134.195	100.722		178.784	255.379	73.2335		20.3841	166.544	231.743		177.848	272.638	223.272		174.338	122.276	174.172		353.871	196.811	23.0259
241.687	122.37	97.1559		191.161	241.482	46.1331		42.4959	173.32	274.817		182.597	254.196	216.545		174.122	139.767	164.547		342.433	227.422	27.8336
243.578	103.523	75.4129		188.952	235.789	55.7047		40.969	191.048	246.043		169.556	251.764	212.394		181.738	108.067	200.515		358.747	220.989	46.3227
242.065	123.476	92.1825		204	224.317	46.3349		28.6012	164.961	238.725		191.184	239.165	242.285		169.179	115.33	150.382		336.101	210.592	33.4897
242.906	115.657	96.376		198.385	242.122	71.1922		25.9712	169.134	252.958		185.635	269.595	241.008		170.523	123.337	164.373		359.424	168.101	27.9323
216.792	125.194	75.2552		186.41	251.833	67.8255		20.5948	167.42	266.073		181.897	278.158	221.973		177.224	129.138	209.03		360.541	188.914	36.6953
221.591	116.456	80.8937		199.322	261.328	60.3905		22.5476	170.863	238.5		183.928	283.398	213.959		173.904	139.729	180.044		349.585	168.784	27.7733
227.815	123.735	81.5469		184.76	239.444	65.4472		20.0074	176.424	228.562		163.256	291.04	217.219		180.227	127.071	196.114		365.563	225.073	33.9965
224.772	115.836	75.0342		183.453	258.891	63.1672		22.3531	172.798	257.244		189.318	235.581	222.276		178.872	133.285	173.876		356.297	175.616	27.7021
196.514	121.389	115.37		197.595	244.236	64.9253		19.2902	179.426	238.472		189.206	234.229	212.018		174.113	129.161	195.859		335.794	193.121	30.6652
188.838	125.747	92.7799		199.279	248.796	68.9783		34.6513	186.33	246.645		187.119	272.517	231.096		168.618	132.848	173.896		339.172	215.829	25.9119
208.214	120.003	75.6754		181.937	219.048	66.6659		36.6438	183.706	257.722		192.022	255.671	217.972		204.338	136.3	216.197		367.223	193.255	38.6347
198.706	114.611	110.025		200.726	238.435	46.7626		25.5742	188.817	246.926		188.713	279.342	225.575		169.047	116.748	175.105		338.98	178.669	33.6804
182.639	114.589	125.857		179.1	235.957	62.8159		20.2279	171.007	225.099		185.983	272.946	222.979		184.694	126.522	191.204		358.98	182.851	15.0612
222.895	135.464	81.936		183.297	271.034	72.5198		24.8956	187.901	241.056		160.385	270.599	219.72		197.133	132.173	190.991		369.339	207.466	34.2484
229.194	107.932	81.8145		201.635	274.621	72.8262		29.8313	174.831	231.768		184.608	239.452	222.967		179.726	122.112	155.951		355.725	176.584	19.8831
203.238	123.137	100.803		187.357	263.009	67.5232		27.0476	169.091	235.973		171.133	283.95	214.692		194.039	124.038	154.685		368.196	214.501	45.9715
209.267	131.996	125.845		202.935	259.482	48.771		31.5745	181.064	221.971		185.593	226.537	215.549		182.644	136.007	216.062		349.676	178.654	19.6033
235.357	123.544	81.9051		202.364	229.512	53.2816		37.0498	193.85	225.048		189.678	262.365	217.827		198.835	118.702	190.455		350.72	201.473	15.3236
198.765	126.881	102.128		191.103	250.144	53.4256		37.1697	171.239	275.915		163.272	273.5	223.469		170.063	133.947	150.811		352.976	213.601	15.1451
220.134	116.482	121.568		181.38	257.577	68.5373		24.8642	175.973	264.904		184.911	234.631	215.886		191.006	126.661	182.486		366.223	204.682	42.3621
194.504	119.738	109.514		189.249	226.71	62.2019		32.768	192.471	222.53		186.451	288.098	224.221		187.696	138.135	190.351		366.135	218.531	42.6158
202.067	123.86	87.6928		201.032	220.846	61.6399		17.0966	166.035	226.128		325.072	160.936	105.098		175.977	121.134	160.48		365.217	198.57	15.9671
199.374	124.332	82.4783		179.984	238.55	54.6678		19.2017	162.457	222.591		329.093	186.448	94.0379		170.269	116.269	156.706		347.613	233.336	42.4328
218.445	107.332	110.553		182.271	230.927	71.7202		40.3836	204.055	231.934		333.354	156.956	100.902		187.892	137.78	197.298		357.122	208.761	19.294
182.671	125.373	126.04		195.102	223.29	70.3699		28.725	162.955	223.236		337.109	157.473	90.8967		21.2858	188.962	57.2797		343.846	178.398	25.0063
232.527	128.975	88.1978		196.432	250.471	63.0045		38.5541	202.31	228.845		317.933	151.306	120.25		20.7132	206.468	54.7692		338.829	178.044	15.7223
218.379	107.789	115.9		193.582	259.571	55.1485		37.3678	197.91	226.18		320.199	183.013	105.007		18.6966	211.785	55.2683		337.275	178.68	42.697
233.081	127.978	98.0477		174.548	249.797	67.2679		40.8266	173.596	261.873		322.819	165.207	101.161		31.0668	198.941	23.8913		370.07	175.906	34.4161
205.963	116.921	116.356		191.441	239.799	61.7407		32.5373	185.863	232.65		322.09	168.116	110.245		19.2112	202.659	50.9646		371.272	223.053	23.4855
192.455	128.387	97.8307		197.533	232.505	70.263		28.0105	184.233	222.664		322.483	180.449	90.6858		6.72702	201.802	36.5978		371.664	199.408	33.8342
220.26	120.322	82.5272		189.887	245.514	61.8792		34.2067	165.668	269.044		332.167	170.942	86.2586		15.4091	209.231	30.8641		360.253	193.158	25.6929
180.412	132.691	97.9731		193.775	271.647	67.0421		37.8294	191.241	258.515		324.75	150.206	80.7285		34.4423	181.484	70.2898		337.918	203.84	15.2059
237.982	113.687	110.035		184.11	250.71	48.3186		31.0499	170.779	226.356		317.566	168.386	121.504		18.8524	211.394	23.5969		349.711	163.556	20.0183
186.571	136.721	97.8753		189.817	240.513	70.3759		14.2543	170.669	246.479		332.048	186.61	88.6872		19.0104	189.131	63.5269		338.794	228.249	42.3127
214.387	122.501	93.9004		178.706	267.656	64.5136		19.3104	178.566	255.867		325.403	155.402	77.6117		34.6649	194.659	21.4762		367.244	178.497	20.0793
219.212	111.043	98.6252		174.071	241.44	57.3778		29.6551	179.068	227.067		333.484	155.544	82.8129		21.5932	187.843	43.2312		344.444	204.472	15.631
205.782	124.028	93.0231		195.543	254.442	57.9391		41.4756	192.444	226.527		342.433	181.475	95.3543		11.9304	212.3	65.7183		339.22	164.581	43.7049
222.063	111.905	82.8887		199.808	248.245	55.6423		18.6059	166.874	258.663		331.298	185.456	101.634		24.891	203.587	51.504		361.466	208.576	16.2426
248.284	112.459	69.6917		182.437	258.344	73.4574		15.1004	165.352	262.951		330.31	174.143	91.0759		6.24006	205.882	45.495		340.301	174.087	43.1475
217.12	120.247	99.011		190.349	263.509	61.0642		26.1887	185.714	251.427		337.8	177.546	88.769		25.2134	210.706	14.6306		352.407	185.813	34.4192
244.663	132.311	125.95		199.94	252.188	48.807		36.5172	201.159	235.716		320.977	160.473	116.817		26.935	184.661	57.0552		339.943	186.764	34.4689
171.473	127.854	98.5924		183.172	248.515	63.5637		28.5675	184.697	256.651		318.525	168.856	116.891		23.8788	181.012	48.7252		362.906	167.982	36.9291
178.981	116.936	111.577		352.608	185.248	168.352		18.6978	163.53	236.516		328.618	180.659	91.2002		32.7103	203.682	21.7214		364.453	196.84	34.6206
192.77	122.593	122.884		352.473	146.879	216.511		38.415	190.391	237.464		336.546	188.608	95.4069		21.9877	188.933	49.1933		370.921	200.359	23.309
234.233	124.071	123.219		370.317	146.953	196.036		14.4963	163.306	256.598		347.217	190.084	95.5177		5.80698	205.917	40.135		365.575	215.616	23.2555
224.719	126.465	93.4422		362.844	161.695	209.473		17.4818	175.048	239.767		330.822	162.243	84.1217		36.2678	212.321	15.747		365.551	217.559	34.1038
196.319	132.662	122.718		354.998	148.775	173.908		23.5047	181.981	255.932		327.559	176.843	107.749		27.756	175.247	51.7993		354.886	226.961	34.6221
234.641	99.7852	103.347		350.942	151.844	158.25		34.3736	194.927	252.283		325.736	164.368	111.9		13.7359	212.216	24.5546		346.814	172.827	16.9049
202.417	110.785	112.089		349.422	147.971	186.028		30.4506	194.126	242.178		325.196	185.344	106.919		28.7285	188.044	27.9715		370.197	164.467	35.0445
219.944	119.677	94.7288		345.354	150.22	189.984		24.9628	181.485	248.629		329.116	160.92	95.0511		21.9141	203.238	59.6501		341.058	172.851	35.1623
229.895	119.015	111.82		347.658	156.577	178.756		28.1792	164.651	253.02		320.819	150.408	128.234		12.7846	196.556	43.6433		354.914	194.483	40.3479
216.973	119.284	123.138		359.813	184.042	163.597		32.2883	185.69	263.432		316.273	150.195	103.157		23.4074	202.88	43.0005		340.531	188.896	28.9605
224.104	130.701	77.0913		358.955	161.739	196.49		40.4952	188.28	266.134		334.86	164.966	94.8902		12.2073	207.987	59.7877		370.395	200.955	39.8365
176.097	124.809	102.713		351.513	181.793	163.547		42.0706	188.31	251.961		323.24	155.37	102.931		6.41443	210.296	43.2203		363.879	197.625	43.4401
190.299	129.147	123.312		344.363	149.023	217.991		16.4127	166.753	240.566		324.67	175.296	84.4551		20.2811	202.139	66.0397		350.238	197.22	29.2816
202.813	129.287	93.4215		357.153	154.537	190.753		38.4335	199.919	242.15		316.438	156.749	112.537		23.8008	188.149	27.9574		360.773	201.95	36.8137
207.141	110.229	123.723		359.367	150.711	196.851		31.3676	168.725	233.158		323.604	180.166	108.061		37.9067	200.487	28.1746		362.611	212.282	29.097
240.885	116.422	71.7937		353.441	155.203	169.929		38.863	199.485	251.662		326.196	165.595	97.2638		33.1223	180.134	35.3737		347.86	175.568	32.0071
229.25	133.143	98.5404		364.018	182.41	169.831		31.1572	192.226	228.069		325.028	170.504	91.4447		27.7515	174.931	59.6049		371.175	219.002	37.0136
174.82	111.137	117.099		365.512	163.458	191.161		30.4564	174.022	266.523		317.565	163.386	73.8325		16.1056	188.516	52.1238		353.283	178.63	31.8582
206.425	123.414	72.0162		350.132	158.778	164.783		21.0919	179.721	233.087		321.51	183.436	96.4204		16.6741	207.904	64.3979		348.809	229.908	36.9142
227.195	134.865	90.1127		367.543	169.012	186.145		28.2492	173.473	241.287		327.807	158.414	99.506		24.2981	210.028	64.297		349.809	187.199	40.4227
233.956	118.439	117.438		365.264	178.333	176.597		32.3242	176.647	249.945		333.326	169.856	92.9085		10.0147	213.683	61.156		354.083	223.955	48.7622
239.85	135.874	123.781		358.189	146.651	184.39		40.452	197.254	229.942		316.079	153.51	133.691		27.9082	185.898	48.3932		344.999	234.622	48.6248
217.919	124.036	127.278		363.229	166.727	184.1		14.5163	162.185	230.271		329.291	157.048	108.963		11.4539	202.295	59.0988		361.424	210.251	35.331
215.166	125.649	90.4294		351.196	152.705	177.149		37.5384	196.307	236.69		339.974	179.555	99.2813		19.8278	213.37	49.4858		345.857	215.918	40.6617
224.367	114.45	123.776		347.814	163.012	154.668		36.0581	170.903	264.339		319.869	182.93	112.904		31.9246	170.731	58.3801		368.25	195.751	26.7897
215.866	132.424	72.6179		366.465	165.002	180.292		20.2232	173.862	234.394		317.083	156.597	118.459		25.0058	196.119	58.6307		360.564	201.072	17.2665
234.025	120.687	90.9431		343.057	152.761	206.825		23.7979	163.796	240.74		341.617	152.106	75.2552		16.8563	194.856	64.714		357.465	219.997	40.923
197.894	131.484	90.7378		352.793	163.327	170.909		24.5599	163.833	228.023		329.902	181.259	103.751		25.9158	202.336	63.9274		336.324	230.004	48.8013
185.15	127.739	112.069		340.875	153.987	219.842		390.06	168.677	92.5901		322.844	155.24	85.3115		35.4682	174.009	47.0385		365.1	228.482	40.3573
232.804	129.018	123.688		364.461	172.296	177.143		384.765	167.779	112.269		334.875	181.712	89.3159		36.0378	167.617	63.0866		357.671	161.553	40.8113
244.546	124.994	103.755		358.199	179.824	165.408		390.687	169.279	112.142		341.193	184.249	89.4212		35.6863	175.663	37.7844		368.997	217.878	26.5215
178.193	132.334	112.494		346.31	156.74	155.127		371.548	164.777	112.51		320.223	163.884	113.158		14.4099	200.561	61.8768		366.183	212.896	17.5403
191.201	125.678	104.947		354.222	166.96	181.064		400.216	164.599	77.561		331.964	151.915	91.5356		37.6178	171.635	41.3762		354.387	214.146	36.8613
237.122	102.589	90.7216		352.075	160.264	177.333		375.401	173.801	122.264		338.013	152.766	95.5889		25.5664	208.84	22.8239		358.923	231.051	17.2975
223.68	110.618	104.928		369.954	165.12	221.371		383.946	165.609	93.4588		336.584	186.921	85.1492		34.015	179.811	66.4174		357.666	187.5	21.0782
199.492	118.229	89.7824		354.186	173.972	185.047		365.727	182.488	122.702		348.483	185.394	81.5791		15.2906	193.049	35.6559		349.891	221.277	37.4054
185.394	127.698	99.4296		355.561	159.237	181.352		368.737	169.774	113.037		324.669	185.116	99.5537		33.7983	195.326	36.1235		370.534	227.786	37.3725
219.974	127.582	84.158		361.138	160.527	177.399		366.742	166.719	78.4664		346.78	192.177	75.7802		30.3227	206.745	17.741		344.522	199.836	40.7136
200.001	130.695	99.1798		368.356	165.383	186.918		378.813	167.011	106.631		343.01	149.694	90.4031		22.2317	185.444	32.8739		355.044	203.377	32.0697
237.489	117.415	84.3616		364.47	156.411	181.778		381.949	163.187	106.629		315.174	161.753	118.97		24.014	192.491	67.0653		344.85	167.02	29.8355
194.786	135.738	104.793		354.628	161.694	187.729		370.459	168.24	106.68		323.466	157.706	109.996		21.613	202.706	35.9504		348.562	191.969	35.1377
212.283	122.828	124.097		361.074	165.274	214.826		379.018	162.219	85.3495		329.635	156.468	89.9191		27.523	191.181	46.3694		353.329	187.15	26.7851
217.693	111.766	105.363		359.861	171.735	172.36		380.538	166.941	124.703		328.214	176.942	96.1246		36.5171	178.665	58.5818		349.87	179.071	37.7227
186.105	128.37	84.4162		348.618	169.161	184.739		365.747	165.321	86.3567		342.435	170.546	219.087		31.6422	180.596	49.8898		371.228	192.384	21.1788
201.912	120.106	113.192		363.257	158.297	194.776		374.737	171.039	79.9238		334.7	179.252	235.18		15.0039	206.186	69.44		366.948	187.101	18.3961
214.748	113.753	99.8318		356.816	160.055	172.562		384.249	170.827	95.6517		325.525	207.868	242.046		19.4472	184.06	53.2927		340.797	226.869	50.3103
204.211	100.415	95.8071		345.013	151.476	181.967		394.405	164.051	79.8285		318.964	207.057	238.526		33.8586	188.355	25.9841		350.687	181.402	24.3594
181.54	109.661	119.312		355.991	172.966	178.056		383.69	165.697	86.7355		318.219	168.768	228.255		6.97147	200.892	47.4114		367.757	232.129	27.4165
215.373	104.534	95.1747		349.271	148.371	200.647		374.657	177.252	127.244		325.556	168.166	232.065		7.64308	206.735	56.3071		358.117	190.199	32.3216
221.639	111.696	119.143		370.056	153.494	223.369		405.51	168.32	95.8787		331.225	171.333	222.201		27.4024	186.332	36.4095		345.006	163.433	35.4163
221.585	122.766	91.2235		358.452	153.053	208.4		370.503	182.654	126.925		325.207	172.903	222.328		13.8193	207.062	47.5869		340.445	195.3	24.5814
226.563	127.691	85.1854		338.19	154.187	207.633		377.28	164.576	114.257		327.678	167.47	219.112		7.24854	212.357	56.3831		343.172	184.483	41.6394
236.009	120.794	73.8772		351.804	170.04	173.102		373.744	168.649	86.9922		331.68	182.697	232.054		18.2234	186.089	38.6506		352.743	196.051	18.2434
183.643	117.24	119.318		355.603	169.345	167.249		374.627	174.178	114.902		345.067	205.028	219.779		28.3121	188.252	42.3303		347.025	224.626	32.5943
241.994	118.784	112.853		353.724	153.028	185.246		365.028	174.16	107.592		315.695	214.993	232.979		12.0375	197.787	33.5226		336.892	165.865	21.3721
193.72	134.274	84.1793		349.454	156.541	185.442		404.582	168.252	87.9308		321.91	195.586	225.825		14.6144	198.183	56.1512		341.376	229.169	32.7759
249.707	132.964	113.986		359.163	155.888	185.16		400.655	170.14	98.0739		316.58	210.649	241.496		25.7541	200.118	69.8148		360.527	198.605	29.8655
213.698	121.063	74.0012		352.84	148.938	168.101		379.482	169.874	87.4699		334.525	168.573	236.076		28.227	200.317	18.8053		351.279	201.042	37.7672
201.88	118.554	119.273		350.794	165.289	188.792		402.981	166.573	81.9476		341.217	149.372	214.8		25.5469	182.814	65.7258		338.369	221.96	30.0538
211.068	109.395	113.169		367.927	157.729	202.265		389.444	164.1	99.207		336.181	170.671	232.438		24.3806	203.43	18.5723		337.665	210.3	38.2899
193.937	120.9	95.8714		366.899	155.783	188.833		389.321	162.721	82.2766		343.051	152.81	222.35		20.9683	211.22	29.8545		361.739	197.424	21.9866
211.573	134.783	84.3835		362.401	179.246	182.25		385.677	165.119	137.084		324.965	164.166	214.735		13.0451	189.824	39.1585		350.652	229.38	29.9011
228.824	107.528	74.3741		365.804	151.072	202.861		371.403	165.126	82.6972		320.149	150.422	227.94		27.4518	179.928	42.317		345.702	201.069	20.9478
361.121	149.358	99.3451		366.669	186.46	168.287		390.201	164.012	109.889		324.509	152.263	227.973		18.4556	212.556	60.8099		346.918	172.562	24.303
385.056	145.736	77.4767		356.092	164.847	209.077		367.282	175.875	117.228		325.922	172.858	238.756		29.7326	199.531	38.96		354.284	228.16	41.4512
361.576	157.001	121.173		353.964	149.303	156.592		395.722	169.135	75.8654		325.102	152.368	233.825		21.0387	208.774	18.2934		340.761	233.784	41.1397
358.307	144.735	122.586		360.956	147.127	178.53		383.097	169.262	101.053		319.663	198.878	238.898		13.3248	201.279	39.0679		355.313	232.358	27.2262
366.618	147.714	100.045		198.186	243.324	173.054		380.707	176.981	141.115		326.549	178.072	225.78		30.8685	171.61	63.0802		365.754	190.072	25.0214
379.343	146.544	78.0398		169.208	238.169	176.096		386.793	170.571	82.9728		324.353	171.681	228.402		8.5088	201.899	54.4287		361.195	176.439	18.3857
380.308	147.553	74.0478		169.981	247.735	164.528		376.652	181.103	142.504		333.34	210.759	230.239		36.7887	198.296	21.191		360.612	206.23	24.8507
352.813	144.869	85.7591		173.661	228.567	198.62		392.083	163.74	90.0886		322.357	164.947	236.755		37.6277	202.304	18.9251		344.954	191.617	41.5238
365.095	153.114	123.886		193.893	240.544	175.8		388.873	163.761	142.855		337.982	207.665	220.427		36.8116	169.242	59.4641		368.451	205.831	18.4949
372.899	145.535	74.1674		174.968	261.253	154.526		376.242	169.401	102.366		323.762	149.353	220.173		26.6154	210.614	57.461		351.627	217.269	44.8122
370.79	148.529	92.4941		200.828	238.318	173.614		370.334	175.057	102.649		330.608	161.058	214.979		33.9677	184.527	31.1694		336.131	229.304	25.0347
375.439	147.333	80.9227		174.84	236.599	185.063		190.85	115.237	179.746		341.846	167.186	215.171		18.9666	189.865	30.7723		348.799	225.13	45.0162
365.792	144.934	72.0852		183.843	263.781	162.002		222.81	131.662	176.112		327.326	155.764	236.454		33.3015	196.547	30.7837		340.991	197.713	30.5147
363.414	158.48	127		171.563	266.427	155.016		194.639	108.187	152.753		344.212	211.209	221.396		26.3485	177.028	64.0675		345.832	172.462	37.7631
382.844	150.189	69.539		175.686	222.656	199.294		199.123	127.455	185.876		341.292	215.36	220.392		200.858	266.103	234.041		345.42	163.964	25.5728
372.502	146.39	87.2049		200.83	247.971	170.725		193.584	133.79	193.362		331.073	173.322	233.522		187.48	243.357	226.923		364.036	183.38	22.5567
358.302	151.368	95.278		174.392	248.505	184.782		210.608	131.045	186.353		321.598	155.987	221.053		200.747	240.632	224.389		337.105	187.173	25.4675
360.306	154.89	103.518		200.218	254.824	164.729		214.276	120.703	152.616		337.154	174.59	239.305		202.513	221.894	242.812		341.013	219.632	44.9925
351.552	147.543	95.8561		191.35	246.68	167.281		211.039	129.838	173.266		334.575	159.758	220.568		181.855	250.226	241.496		346.735	188.273	25.4743
377.104	150.545	69.8464		171.951	260.555	170.662		213.989	156.09	192.669		320.994	208.422	233.552		202.806	276.966	238.623		352.146	184.798	19.2823
358.015	145.611	72.3026		186.691	242.368	173.821		193.297	153.92	213.538		339.205	187.204	239.801		198.862	244.768	234.687		357.106	203.604	22.1185
350.789	156.767	104.829		179.847	236.299	190.066		214.435	138.235	186.032		318.806	162.009	224.425		203.272	227.279	225.174		339.565	225.095	37.9435
366.997	145.109	83.0213		196.248	255.064	158.308		217.782	128.948	179.5		326.626	164.044	224.583		186.601	258.643	227.979		342.728	232.947	22.4378
386.989	147.009	70.3817		184.959	262.455	155.897		185.68	131.796	166.99		324.072	216.164	239.975		192.469	253.467	224.786		368.347	208.609	25.685
364.708	148.825	112.575		181.078	255.653	158.072		185.742	120.614	154.462		335.623	166.847	216.063		177.932	254.148	224.959		353.762	210.128	33.4261
362.623	146.967	79.8109		200.671	248.724	164.828		208.93	136.154	189.296		316.358	202.408	243.588		199.23	253.898	235.084		371.578	169.377	30.4557
363.713	153.806	114.719		195.944	247.929	167.545		189.881	116.222	167.074		333.823	189.195	228.602		196.61	222.095	226.502		357.026	234.776	22.7624
392.159	144.796	73.2038		189.806	239.671	180.347		200.73	137.138	154.397		327.268	192.683	228.835		204.491	267.574	246.502		361.51	173.439	30.457
364.132	146.082	90.2334		179.164	245.018	156.5		194.448	122.115	155.865		320.903	196.489	231.273		194.995	267.646	242.793		365.732	170.016	22.5552
343.407	147.621	99.1188		196.247	259.788	160.88		186.192	103.922	163.013		318.325	198.023	222.749		196.672	272.821	247.425		342.884	221.196	35.5305
348.006	151.04	98.8616		171.093	240.344	160.957		205.971	138.248	193.566		331.228	215.599	243.833		199.946	270.019	239.288		344.423	209.087	46.0066
392.092	183.161	217.693		168.849	243.691	177.167		186.622	102.927	158.601		328.306	201.02	222.911		177.804	245.857	230.078		202.88	308.587	151.018
382.288	163.184	221.512		193.527	247.218	173.998		187.941	108.702	158.251		321.666	204.397	224.662		202.011	259.925	242.814		185.145	299.734	156.729
404.514	154.152	205.547		189.059	248.589	171.179		207.327	121.078	155.916		318.161	175.001	234.046		191.111	230.689	225.116		204.341	254.035	186.591
412.797	157.685	225.615		195.228	253.261	168.971		211.191	134.206	153.693		331.523	163.241	236.305		197.19	280.393	240.37		192.515	305.367	192.19
404.309	150.284	215.234		202.988	242.93	169.107		196.838	119.901	189.821		328.659	211.037	224.267		187.092	284.245	240.093		172.963	289.988	208.841
409.595	149.392	213.594		187.404	232.883	186.94		201.141	127.401	176.754		315.954	214.17	222.591		202.208	251.426	224.596		196.506	309.45	162.423
406.116	147.816	223.073		184.352	244.297	182.058		203.49	133.44	174.006		341.642	215.852	230.911		195.224	242.982	228.497		179.507	309.901	170.005
416.416	150.934	227.938		179.155	246.753	165.4		211.495	135.894	173.896		329.605	168.505	236.555		189.454	242.251	232.747		191.157	304.293	170.291
406.372	148.738	200.397		175.916	241.92	181.689		195.053	125.085	163.157		319.603	170.946	236.252		197.774	257.217	226.316		196.955	300.831	191.978
391.932	163.594	218.332		175.904	233.21	193.671		198.097	132.389	189.752		324.364	163.324	220.507		204.72	232.124	233.035		197.611	304.301	178.744
409.802	153.312	211.595		185.554	257.022	158.233		184.109	111.263	167.814		338.107	214.982	238.591		198.572	232.393	233.944		179.516	308.116	163.141
415.388	150.99	236.069		168.342	238.563	155.749		222.908	115.212	149.658		328.089	156.383	230.951		201.591	222.065	231.419		193.239	311.538	157.344
414.054	150.068	215.708		193.921	253.295	163.021		218.072	134.087	176.68		344.854	164.025	220.557		191.027	284.472	236.708		187.475	295.162	152.249
417.196	151.545	232.132		169.325	245.358	155.882		186.79	130.858	200.922		343.405	157.518	216.608		350.319	166.503	79.1088		180.416	312.951	186.383
394.515	176.235	200.79		169.876	238.673	194.525		196.41	128.249	193.577		341.394	197.416	237.29		356.998	187.308	135.068		190.524	298.077	157.562
414.398	145.92	234.424		187.684	248.606	177.379		191.556	119.334	174.34		317.863	179.885	226.8		361.415	148.624	100.499		173.201	296.063	209.319
417.715	156.316	210.178		169.426	224.862	202.22		187.883	122.842	171.004		327.396	209.834	236.935		340.424	158.366	88.0281		183.045	311.433	197.68
359.948	144.052	199.997		173.831	242.057	169.397		197.748	121.114	177.193		319.605	207.486	244.686		345.573	172.428	135.416		185.889	306.528	171.065
390.849	180.228	210.286		188.014	226.758	187.872		198.515	114.051	152.995		328.682	190.207	224.411		338.689	161.481	92.498		189.805	311.076	162.93
416.418	152.115	204.236		175.061	253.248	169.921		200.302	123.451	152.919		339.915	188.992	225.816		358.118	162.713	125.788		188.355	309.228	179.781
401.781	170.435	205.601		201.03	250.467	159.378		214.479	114.695	164.032		324.686	179.754	231.386		349.473	149.561	93.3016		181.067	296.541	157.177
411.32	150.556	219.132		184.456	239.387	178.337		205.196	107.329	160.557		335.099	215.338	238.353		358.378	162.531	96.4798		175.476	303.988	180.999
402.576	152.891	218.87		184.145	251.5	157.204		201.316	130.431	155.906		334.347	200.285	228.954		348.126	157.038	126.646		182.011	302.547	187.164
412.654	148.475	210.718		181.087	219.78	196.098		205.056	126.846	181.087		329.026	206.724	226.56		363.256	156.757	83.8533		169.78	300.906	171.659
417.189	147.137	212.55		177.013	235.984	178.876		219.712	139.633	177.055		346.116	209.667	227.104		361.102	163.383	135.966		184.012	305.274	146.166
411.605	145.593	236.937		192.962	263.21	161.462		194.838	121.965	181.259		318.617	169.21	221.213		364.16	151.408	109.345		179.053	308.297	198.745
414.013	145.78	220.699		190.669	252.014	172.473		210.875	140.84	190.364		336.769	171.583	227.465		358.593	150.809	127.294		196.666	300.498	162.723
412.934	147.417	226.057		189.199	266.538	159.766		212.712	120.341	174.498		318.341	201.675	234.449		359.241	156.39	143.252		188.614	256.219	193.738
415.869	155.046	199.813		170.547	233.061	197.568		204.843	133.772	152.702		337.71	171.66	221.09		354.711	151.999	101.926		169.507	309.152	180.223
417.142	153.296	212.373		190.775	245.442	161.715		203.089	123.741	160.609		322.338	160.805	228.635		368.354	167.96	88.8364		190.714	304.716	146.015
407.757	147.663	229.938		190.522	224.705	184.343		217.709	122.45	163.569		328.56	162.411	229.302		350.747	167.2	142.649		177.329	308.423	157.507
390.323	158.258	207.931		180.204	250.617	160.109		208.149	117.367	150.116		336.497	193.568	225.162		367.644	189.056	132.585		185.84	304.564	199.561
392.981	173.584	212.323		37.6391	177.23	278.808		221.898	110.69	152.877		331.479	206.418	231.93		364.354	149.155	127.327		177.657	313.915	163.756
405.678	151.181	224.352		28.4541	180.402	263.595		206.418	125.436	151.152		344.924	207.061	232.13		347.565	162.099	97.5841		204.2	297.146	187.949
401.795	146.006	208.766		26.8879	184.709	268.682		190.332	128.436	174.384		327.55	184.663	227.132		346.042	159.234	81.4892		182.027	306.663	181.05
383.679	166.009	238.241		32.9061	186.994	238.575		185.418	107.357	172.274		335.83	206.284	225.084		358.233	175.141	132.566		186.48	309.102	187.884
409.827	146.651	233.971		22.2625	176.492	259.149		191.694	132.352	158.608		348.22	166.942	217.991		346.995	151.718	102.434		187.434	310.115	146.389
414.238	157.953	220.047		27.0116	187.082	259.105		191.049	112.766	153.415		323.376	203.528	229.877		344.256	162.762	93.6724		179.011	302.778	158.677
400.679	168.035	200.046		27.4766	164.547	254.8		197.126	104.188	150.613		318.636	188.068	246.398		351.516	155.012	132.982		178.468	245.256	188.425
409.079	149.653	239.035		21.2072	161.433	245.069		192.175	138.226	204.289		315.411	210.846	246.776		354.432	152.304	93.8736		169.779	301.344	153.029
355.69	148.058	215.399		26.7294	168.193	287.659		215.526	124.705	177.527		339.465	201.822	225.09		344.098	155.671	132.89		181.264	303.528	152.527
416.447	157.027	221.924		36.4743	169.152	287.823		190.206	115.345	158.775		321.528	157.312	235.025		368.076	158.474	116.694		175.343	256.756	201.949
374.58	147.722	202.346		37.1453	188.799	238.444		218.061	129.248	156.317		327.18	160.681	235.154		344.792	158.143	98.2993		176.746	312.877	193.377
411.609	149.676	235.115		16.4228	165.506	274.184		202.193	113.728	171.673		315.52	176.166	229.717		358.03	166.241	116.056		179.557	297.605	147.83
417.448	156.269	226.022		10.7128	157.664	264.913		185.907	104.023	168.585		334.503	178.778	227.379		339.842	161.485	81.3607		200.327	248.745	189.324
397.82	170.146	213.34		24.9085	163.439	264.554		191.028	131.258	150.686		346.964	174.854	221.472		345.586	172.28	144.102		185.276	297.932	147.671
397.689	186.964	211.792		24.4632	176.04	250.749		188.662	134.238	205.308		345.694	168.96	225.198		366.939	157.309	111.746		199.046	307.645	172.532
409.878	153.482	216.108		35.0021	151.767	234.049		186.299	114.468	187.57		316.64	158.791	213.265		357.755	156.379	137.305		196.363	293.928	194.208
385.594	158.86	220.648		23.4498	159.208	239.121		223.226	130.586	149.742		339.242	162.5	213.523		365.332	153.004	103.55		193.617	299.51	193.984
403.147	144.351	234.543		23.7545	161.544	233.654		192.986	139.831	153.047		321.523	154.984	214.26		366.049	163.889	121.798		170.307	292.602	154.206
385.52	159.173	200.786		25.6743	154.645	279.386		190.103	119.368	191.699		328.879	149.753	219		356.724	151.12	112.305		197.995	311.324	181.582
396.475	160.067	205.111		37.1973	179.441	274.197		187.846	144.651	152.702		184.899	246.291	179.58		346.595	151.241	128.408		176.318	308.35	148.028
411.865	153.993	205.518		29.9224	161.311	233.786		192.735	143.71	205.134		172.185	251.506	173.476		369.691	158.451	82.0008		171.873	307.248	153.642
411.27	155.322	232.35		17.502	162.802	282.811		200.17	124.502	191.951		174.618	266.581	179.607		369.554	180.537	128.352		184.166	309.291	159.121
398.789	166.222	204.457		25.4799	158.262	274.277		205.777	127.266	187.558		167.193	253.988	169.51		358.036	162.139	85.0795		184.683	290.339	203.508
411.378	148.241	204.373		16.6438	148.003	251.263		201.944	104.436	156.496		161.455	271.675	190.021		369.618	159.656	103.823		193.057	312.844	182.449
246.535	221.549	42.4407		19.6411	165.555	264.453		187.409	128.605	187.319		162.43	262.059	197.184		348.02	154.989	94.2494		182.123	310.752	154.11
221.056	247.791	49.2206		16.4441	169.968	278.801		212.642	147.922	191.843		175.102	246.042	183.358		366.458	157.049	90.6047		203.022	299.746	173.026
210.603	252.673	36.016		32.1458	171.176	278.944		204.828	113.882	153.607		172.502	262.48	197.536		348.503	163.392	85.142		198.896	308.561	189.441
217.753	254.426	35.8747		11.7959	155.132	283.076		215.391	146.231	187.398		170.425	282.065	179.435		353.198	159.465	90.4849		186.396	304.4	159.999
233.795	235.979	53.0238		19.0613	164.88	254.748		185.836	129.746	161.135		162.794	289.709	197.527		350.089	163.305	138.704		201.756	308.313	159.429
233.031	248.408	56.0133		20.343	173.294	251.462		186.915	124.698	192.059		162.916	250.353	192.411		361.716	160.426	113.132		190.276	304.989	154.398
242.469	224.12	37.8135		20.1281	150.747	265.159		193.629	126.241	187.591		185.439	278.54	181.122		361.05	161.734	117.768		172.246	310.862	165.982
177.811	221.127	48.5109		32.0262	192.837	251.402		186.824	123.682	183.573		171.581	265.728	184.022		361.354	150.813	139.277		181.044	296.253	204.555
210.998	245.828	36.7837		24.9641	149.741	234.821		188.777	131.614	192.106		191.109	280.774	181.595		349.352	187.76	139.571		176.321	299.571	204.477
242.57	215.138	56.9645		31.5934	172.42	269.094		212.775	121.176	159.486		182.913	257.357	203.587		367.087	166.133	117.965		180.156	290.011	204.426
228.907	241.112	59.0547		18.5328	160.92	288.674		186.968	127.169	153.135		172.553	250.315	194.749		363.979	160.623	78.6833		172.586	311.011	195.27
238.219	250.287	16.6942		29.8931	150.975	296.737		193.469	137.708	157.452		178.257	249.549	200.2		367.729	166.032	82.278		187.068	313.271	194.911
221.596	229.496	57.7553		19.3878	175.314	275.364		190.06	110.12	168.903		181.976	255.875	194.736		355.334	150.333	134.628		199.701	302.867	189.625
250.076	252.988	44.3199		22.794	167.576	259.847		213.774	111.918	156.945		188.48	247.389	190.907		363.519	185.459	134.368		200.808	301.787	183.631
227.475	260.451	59.1302		35.4411	184.114	279.755		205.994	128.46	159.196		172	246.971	173.713		352.499	153.698	78.6829		185.63	303.257	189.635
220.656	230.709	53.1261		12.9427	165.128	265.142		215.092	135.609	151.185		164.608	259.89	174.242		350.3	173.34	139.835		189.174	301.355	195.87
248.777	247.411	43.3882		26.8945	170.791	265.325		195.52	128.97	159.291		161.809	273.264	195.261		361.806	156.375	118.426		177.474	299.098	155.167
212.745	214.57	59.1454		25.497	166.611	235.177		223.372	135.417	165.329		182.147	257.504	189.957		361.916	187.271	130.83		200.425	294.753	190.192
245.358	224.145	56.211		23.6354	162.469	251.871		196.376	132.333	154.513		160.437	264.321	176.674		185.289	284.275	111.778		170.686	311.758	159.861
210.79	238.345	21.1517		9.71967	151.062	265.52		189.032	131.722	184.323		187.503	287.041	204.223		189.377	283.77	124.825		188.581	308.172	195.867
231.056	233.513	38.0247		27.9849	184.895	274.942		185.875	137.471	153.13		161.733	241.015	179.308		194.263	280.047	102.608		203.743	311.629	184.015
244.899	215.884	50.3198		18.8431	171.782	260.158		207.565	134.184	159.149		162.471	285.614	165.197		189.514	265.246	91.2834		174.703	312.778	183.53
245.689	237.732	59.7044		31.2694	154.849	235.331		223.465	127.335	172.602		167.638	269.697	190.436		168.815	263.942	83.5525		183.296	303.213	166.339
249.603	215.483	29.4189		28.955	156.507	252.857		188.484	135.589	157.251		179.636	255.14	181.92		168.943	264.697	141.976		174.441	294.67	149.434
198.946	222.676	48.6103		20.7405	169.703	284.066		201.98	138.003	196.587		180.928	224.485	173.91		178.283	270.146	99.1452		188.758	305.277	174.395
228.025	223.061	43.9304		26.5291	156.532	260.441		184.52	131.258	207.431		170.585	228.171	176.62		173.574	276.257	117.18		185.691	298.081	196.545
221.218	254.712	44.2152		14.355	157.521	252.08		188.677	122.115	197.335		178.048	261.681	184.496		175.13	265.917	134.384		181.151	284.427	206.211
247.237	229.232	28.5614		24.1805	180.075	275.819		198.937	133.266	196.721		182.468	247.21	185.376		171.995	278.609	131.106		182.09	303.254	196.009
245.596	239.45	53.4493		26.9298	177.282	271.244		189.344	106.226	153.571		177.262	285.38	181.727		179.647	277.265	91.2151		174.008	301.244	149.575
197.762	245.258	28.8214		19.1297	158.511	256.46		200.119	120.799	169.575		185.815	236.876	197.709		199.112	278.736	134.388		170.014	256.179	207.772
238.811	247.337	53.3801		25.2712	173.907	284.121		218.172	120.861	169.749		162.951	228.422	160.191		176.756	280.803	117.161		170.179	264.667	207.521
243.637	277.502	46.7158		23.0453	171.337	247.165		209.304	115.282	157.005		181.123	267.506	200.787		171.012	284.344	117.15		198.714	312.786	155.523
229.309	230.802	61.6942		35.6975	184.055	235.362		187.488	99.2857	154.796		176.614	251.624	185.535		180.148	222.312	91.9148		171.765	303.959	161.164
245.667	232.936	57.3067		18.576	151.994	242.662		209.832	132.767	165.702		184.683	226.401	180.113		194.576	265.74	96.1743		191.839	310.861	149.672
248.09	222.837	29.6038		23.4982	162.691	289.942		188.512	141.419	208.056		176.358	225.879	179.954		196.481	274.27	102.704		190.442	295.063	196.541
245.716	241.183	44.4456		27.9368	166.005	242.246		194.768	116.742	185.174		162.844	277.118	174.555		177.057	267.325	96.0235		173.155	302.917	175.964
208.79	216.209	57.531		21.6366	152.729	271.657		202.388	121.553	184.972		166.246	235.471	170.599		191.577	284.038	141.576		173.444	313.572	155.33
216.278	230.046	59.1676		13.6203	156.433	260.87		193.153	125.737	197.893		166.929	240.364	170.517		191.296	272.086	96.3342		196.078	306.603	185.218
243.232	233.787	44.438		29.5562	183.701	248.241		210.403	114.307	169.634		175.103	287.356	193.129		169.053	270.992	112.737		171.28	308.089	185.756
234.188	250.493	44.5264		20.3396	177.852	271.627		212.38	127.954	159.667		163.901	270.658	165.87		169.405	283.173	139.058		173.666	311.496	176.286
242.871	238.584	38.969		22.1159	151.842	256.937		196.404	128.649	178.493		181.167	226.271	192.64		186.07	271.891	105.919		197.03	304.367	156.099
205.048	265.368	43.5737		27.5072	178.729	280.314		194.291	115.317	165.129		160.769	271.763	154.649		190.808	274.349	105.889		193.724	249.243	192.333
207.704	235.669	50.6021		30.2151	158.139	247.563		219.149	128.7	166.29		170.055	227.774	192.903		171.989	281.544	102.769		181.458	293.823	151.157
217.523	248.905	38.7701		23.7081	160.219	261.13		186.661	139.549	157.684		165.016	271.247	181.213		182.963	278.468	95.9851		192.867	311.233	191.67
247.769	237.802	50.5773		30.0541	189.932	266.122		189.552	116.966	149.436		175.296	256.955	174.66		169.271	271.241	131.194		177.497	291.953	207.713
222.981	227.163	52.929		34.985	182.269	253.285		221.797	132.846	159.611		167.696	267.235	174.755		175.468	283.826	96.0484		172.813	302.705	207.968
204.595	229.739	54.0705		16.563	149.236	280.846		189.547	147.98	208.304		173.384	270.297	177.274		193.218	260.378	96.42		197.021	258.459	192.347
243.297	256.074	50.8392		37.3402	177.35	284.516		202.406	117.274	149.037		163.132	223.557	171.341		194.765	275.712	139.451		183.104	299.664	191.794
233.252	239.134	45.0941		36.4272	153.496	230.891		206.184	117.961	173.309		179.764	280.288	184.801		172.124	262.199	135.211		203.008	306.53	186.053
227.004	244.296	45.1516		33.6285	165.223	290.476		204.065	131.419	192.932		166.133	243.615	191.31		204.397	281.25	138.641		194.746	310.181	104.973
189.395	226.314	57.3937		25.9357	172.868	236.089		221.376	134.046	153.416		167.954	224.301	175.107		201.345	222.823	113.486		181.117	274.506	116.622
214.53	249.445	51.0339		18.9328	159.677	248.975		194.101	124.244	173.55		163.871	266.302	201.163		198.392	257.805	99.2922		174.279	257.775	110.358
225.526	247.91	54.3024		12.3603	158.089	276.837		220.277	126.268	150.911		174.306	235.501	175.142		188.403	279.271	106.195		194.23	279.921	116.651
248.328	215.726	45.4445		30.9603	182.144	242.647		216.117	135.426	169.932		170.231	243.197	181.347		183.626	251.627	84.9787		198.459	258.429	81.3619
217.446	221.753	45.3038		31.5166	175.983	231.288		217.831	129.327	173.023		179.228	231.419	171.825		182.337	284.421	117.662		193.024	312.308	121.872
194.172	242.027	31.4706		32.8718	180.918	231.396		220.787	139.687	169.994		175.312	239.392	171.633		185.99	284.386	142.172		203.701	261.763	81.0152
235.035	215.418	54.5548		25.9329	171.289	253.35		195.373	130.457	198.392		186.876	265.668	191.366		197.695	276.703	125.724		181.962	262.941	105.438
208.349	277.071	46.6973		9.86763	152.095	272.176		199.538	118.729	158.104		164.704	249.014	174.872		174.532	282.572	112.792		199.235	306.769	135.191
236.753	216.178	48.1294		35.287	187.326	265.879		184.632	117.772	193.443		191.775	240.511	184.825		177.411	268.955	141.762		194.599	308.387	99.6438
236.128	237.844	40.4974		25.9872	154.182	243.796		184.111	118.426	166.324		168.558	260.962	201.376		200.757	268.754	103.937		171.951	249.655	136.137
238.423	236.937	32.6733		16.8267	164.296	248.905		189.771	124.446	157.978		167.371	278.998	194.739		181.513	277.284	140.085		195.574	303.533	95.3156
214.989	245.969	44.8852		23.7938	174.542	243.234		202.731	132.701	185.386		164.046	234.475	189.151		198.418	272.243	122.843		199.845	290.564	88.4633
234.395	236.173	57.8888		19.2851	156.879	284.829		193.534	123.298	193.428		164.995	270.072	160.951		171.589	257.327	76.8395		175.962	283.115	135.926
234.009	225.967	59.8445		37.4667	198.121	261.27		198.632	134.762	161.764		170.216	254.885	184.593		194.731	254.494	96.8749		181.433	284.747	130.373
247.572	230.639	52.0683		15.6612	150.544	258.361		370.192	188.487	173.417		169.806	229.551	171.613		178.769	284.88	103.518		183.847	245.986	88.7381
247.651	250.941	58.4333		21.3333	166.674	249.158		404.59	193.644	191.601		163.602	285.898	156.011		174.537	270.296	106.992		194.902	288.865	100.053
209.547	232.838	60.3916		23.069	180.862	253.738		398.715	168.278	159.557		173.172	263.36	174.979		169.951	284.896	92.2838		179.386	250.259	89.0627
204.275	224.605	57.9769		19.1825	173.273	267.263		397.213	166.917	153.348		160.382	228.922	171.951		180.442	277.062	123.162		171.456	280.151	105.413
247.478	231.191	40.1847		29.1263	172.165	231.339		385.368	185.154	200.444		186.125	268.565	205.078		168.398	278.323	135.532		189.44	309.566	135.448
226.675	224.973	58.077		32.9569	179.728	285.445		382.287	189.792	163.33		173.266	279.44	183.025		175.152	270.324	128.737		198.264	272.994	88.8972
230.416	219.285	48.3652		17.3867	155.234	277.614		389.952	186.282	196.557		172.272	232.564	171.592		172.484	262.597	78.4278		173.669	303.441	99.9557
247.959	270.796	32.7166		22.3898	156.592	253.577		387.595	167.21	160.244		176.152	250.89	177.953		192.56	279.166	128.967		202.764	247.454	96.3952
250.9	237.534	33.002		23.3228	161.295	280.655		404.504	169.222	211.853		173.778	266.496	189.552		182.418	283.051	129.009		189.588	295.689	88.7329
204.807	232.014	58.6794		29.0935	176.226	258.303		398.127	162.266	192.518		165.359	257.537	193.195		200.277	256.618	103.798		204.164	308.852	100.428
232.259	251.067	48.8499		34.7567	194.262	257.384		386	170.68	164.323		161.106	238.097	166.689		179.398	270.374	88.0805		195.795	312.822	110.966
200.45	268.149	39.7833		36.9294	150.912	292.606		401.833	184.271	192.41		176.511	244.897	191.446		189.071	268.033	99.7383		188.914	251.286	97.0138
222.017	218.791	52.1966		30.9879	176.784	243.932		395.419	173.494	160.032		186.66	247.416	196.856		174.087	277.334	88.3503		180.004	292.703	130.671
214.3	255.253	48.0118		12.9775	152.22	278.025		382.632	174.683	160.304		181.012	275.27	177.891		171.675	272.598	136.383		174.265	312.248	123.358
228.896	229.954	51.6298		36.7384	182.641	244.064		401.639	164.622	212.902		170.703	250.49	191		185.621	283.02	136.484		170.924	302.968	129.98
238.686	258.86	56.8268		28.3718	168.75	249.731		403.645	171.018	180.92		177.179	253.762	195.648		194.418	283.927	136.026		173.375	290.032	135.904
243.647	267.738	34.7823		12.4013	153.618	253.965		401.823	198.267	183.45		159.458	283.571	172.361		196.093	269.312	100.217		191.282	258.112	111.778
241.246	227.007	60.1168		29.9246	175.226	249.445		404.187	167.386	203.161		191.819	263.976	202.309		181.032	262.825	93.7919		187.385	306.355	130.778
214.617	253.9	52.51		35.7207	162.044	282.088		397.692	162.274	156.666		176.796	258.823	195.421		175.018	276.69	126.507		205.736	297.752	81.7824
197.606	228.013	58.4995		31.4419	180.41	237.15		387.63	181.503	203.416		166.919	240.079	182.7		180.118	266.549	132.963		195.311	250.487	89.678
250.577	235.339	60.7157		22.845	181.588	262.32		387.522	173.968	193.171		166.425	289.21	149.82		177.932	274.253	132.963		170.596	265.336	130.646
205.224	261.564	54.0852		11.5465	163.073	273.33		396.379	177.833	175.782		170.157	278.481	201.095		183.44	283.888	123.758		174.717	259.168	118.211
247.892	261.905	35.7676		36.879	174.124	272.847		388.598	174.518	156.649		171.312	274.201	195.621		172.691	268.71	80.0596		190.854	298.009	104.807
238.477	222.091	55.1946		13.3254	161.89	258.841		379.975	184.14	184.697		185.428	280.175	201.943		186.678	261.69	89.3635		178.202	260.453	124.536
243.102	259.489	45.9738		15.0532	168.016	258.688		390.45	177.773	198.029		168.938	237.039	178.639		180.985	274.884	114.582		179.745	308.35	104.642
239.215	253.746	34.7652		22.7605	178.212	267.989		400.618	169.521	189.507		161.494	238.756	172.333		176.172	259.03	80.9315		189.441	295.866	118.208
218.916	242.348	41.3034		22.6953	166.949	287.126		393.623	176.708	203.502		187.044	239.313	189.304		168.261	266.996	136.868		204.045	313.9	104.7
242.639	268.115	58.5487		21.6872	166.715	244.255		393.107	165.466	147.953		174.624	285.942	187.168		182.931	276.658	130.059		184.654	301.292	117.889
246.387	257.611	41.9511		26.6957	178.058	237.895		400.585	165.551	184.651		166.509	226.669	180.855		185.879	282.157	119.191		189.584	258.103	106.106
214.792	232.704	55.6575		33.5929	147.962	294.836		403.39	187.824	176.158		169.116	257.805	178.413		181.028	264.988	89.8553		172.084	294.096	96.6099
195.911	235.727	52.2137		28.0363	186.363	253.908		367.668	191.026	157.413		161.482	255.341	162.455		184.738	270.224	94.6515		169.911	270.124	118.993
179.484	245.241	58.562		12.3605	162.85	278.544		386.193	175.363	178.623		188.693	246.949	185.147		179.153	273.384	94.4437		170.196	275.153	100.774
250.262	249.362	52.6624		22.5612	158.895	267.736		387.915	181.856	157.874		172.558	226.865	167.19		173.59	261.565	141.332		173.022	273.313	111.585
243.199	246.249	56.0299		18.3121	152.757	250.766		396.699	169.432	198.8		162.59	227.689	186.615		172.104	266.431	129.849		199.741	300.257	81.3528
414.336	316.809	110.598		21.9993	167.157	238.603		392.252	171.042	165.176		166.464	243.453	167.439		177.137	240.406	81.5637		177.74	306.965	96.2692
418.072	322.867	120.9		34.6309	154.712	294.711		391.244	181.559	178.98		181.809	268.872	189.377		192.69	223.237	101.909		176.448	246.639	124.363
382.5	323.649	120.353		18.9495	176.353	263.492		374.838	172.838	158.535		183.151	287.99	191.598		185.061	268.911	89.978		177.73	251.438	124.304
362.661	325.483	120.917		20.9066	166.222	278.675		387.941	163.73	149.382		161.111	229.198	178.126		202.227	282.254	130.485		193.221	243.15	96.5731
372.404	309.904	105.734		180.802	90.5972	149.212		392.083	173.074	185.12		182.729	225.366	202.771		168.629	283.955	130.341		174.662	271.258	105.598
387.029	313.019	106.229		172.312	97.2799	109.83		401.684	199.017	189.733		164.473	246.025	157.727		188.787	287.075	131.101		172.326	264.532	125.161
416.587	291.193	95.2835		197.995	134.63	94.6441		388.042	190.998	179.367		180.354	262.382	193.515		200.257	282.783	124.361		178.527	271.583	124.508
414.285	330.45	82.2647		194.121	140.381	89.8072		393.38	195.989	198.511		162.334	255.37	156.979		202.278	263.618	104.829		198.354	273.789	96.8134
352.869	331.146	110.633		181.74	87.7067	111.404		396.911	174.166	194.088		176.946	225.807	167.703		168.994	280.131	109.457		185.369	298.711	131.173
413.986	310.789	75.1584		199.43	113.9	144.752		399.471	189.088	190.445		167.04	280.25	157.805		191.897	268.824	104.92		195.13	287.066	88.4777
368.549	286.828	106.302		172.893	136.557	128.809		386.122	186.781	182.102		165.665	234.247	183.489		199.732	268.308	115.715		169.744	285.887	96.7944
408.634	298.155	100.002		172.554	126.344	140.848		378.234	181.627	172.061		168.837	284.818	185.198		188.386	278.041	98.1034		192.304	277.095	81.6657
364.681	294.776	111.553		172.768	115.447	123.898		376.404	189.008	179.822		180.61	251.598	189.105		176.95	276.185	101.335		191.01	289.129	112.298
402.716	297.628	88.2793		180.008	122.298	145.175		384.821	187.545	158.287		187.724	269.092	187.282		181.907	269.365	124.825		195.675	270.433	102.074
386.855	318.484	122.136		175.953	122.837	148.913		399.977	187.37	171.253		163.065	254.297	189.446		177.615	263.859	82.5235		175.545	303.68	111.966
373.652	294.922	103.547		193.505	120.865	136.987		394.278	177.263	191.025		175.049	271.301	186.983		188.199	256.037	90.8631		204.437	312.532	95.6446
415.886	318.335	99.8159		182.447	94.9754	146.131		392.436	164.346	162.507		189.06	264.122	198.966		170.296	272.49	120.494		193.803	307.608	82.5128
385.541	307.709	95.8175		199.481	111.076	123.634		392.513	177.797	182.931		186.126	225.598	168.603		183.395	269.543	101.784		179.127	295.3	124.582
397.34	284.872	88.606		178.818	105.578	111.669		399.378	175.472	180.324		167.777	269.445	199.056		193.123	285.224	126.275		178.353	270.819	118.75
408.179	307.128	83.2037		198.593	106.036	84.6953		390.534	185.588	162.298		159.842	279.686	163.69		168.297	266.187	91.2375		188.271	287.487	132.035
383.867	314.648	115.594		200.53	109.335	145.938		374.381	190.536	191.12		169.774	227.402	185.418		201.138	275.856	138.259		200.049	246.716	101.709
406.136	333.45	110.974		173.398	128.79	133.458		382.461	179.934	151.708		173.309	279.914	189.86		196.585	263.37	102.36		174.371	288.764	117.953
408.115	305.109	103.875		181.315	103.347	133.464		386.315	177.019	166.958		185.783	279.97	189.649		177.491	286.728	125.686		195.073	254.527	96.3974
409.125	322.062	122.383		177.808	93.6172	112.218		400.593	184.155	179.82		190.655	229.825	196.772		179.923	246.399	83.1793		201.453	272.783	101.823
417.138	317.14	115.098		173.928	102.385	133.729		394.552	201.934	204.673		168.88	280.266	175.367		184.68	272.22	120.398		184.777	269.715	106.593
415.675	338.009	110.522		188.93	122.496	84.7995		385.594	173.776	172.918		159.526	272.733	163.337		169.551	281.168	95.3173		191.701	281.314	97.0655
384.382	341.963	110.73		179.423	98.1764	129.743		398.23	162.201	163.029		186.817	265.193	181.586		180.944	258.039	82.8534		194.353	305.522	131.33
381.771	292.883	96.6009		175.003	106.382	130.47		395.468	182.776	185.904		187.887	286.418	183.134		183.261	277.567	105.4		188.895	294.947	96.9079
417.565	330.974	122.321		180.568	113.516	129.465		404.62	192.928	179.792		167.556	227.917	163.687		188.597	227.853	95.8819		178.92	311.037	130.71
391.432	321.814	103.863		192.469	118.054	90.4434		394.826	172.598	152.197		161.748	284.672	191.513		187.441	275.017	138.566		172.988	248.913	119.081
400.429	322.571	103.668		202.18	102.425	137.815		392.838	183.731	172.72		174.63	276.195	178.585		168.836	266.743	124.981		185.038	309.887	97.5816
358.947	307.255	123.24		173.432	100.55	124.649		384.143	180.693	162.998		165.633	249.601	185.297		186.556	270.647	124.482		184.233	294.807	112.6
412.587	338.732	105.54		189.306	108.013	134.324		385.849	184.878	167.525		162.212	223.489	183.232		171.765	271.539	90.9409		190.993	283.54	124.817
414.69	324.561	115.876		177.317	109.694	141.15		380.579	186.207	167.433		163.152	244.971	199.4		177.756	283.87	138.532		170.941	278.773	131.807
389.971	286.71	97.0937		189.667	108.245	145.748		395.482	162.122	183.328		163.851	257.396	185.555		169.79	275.281	125.532		177.104	306.178	125.117
401.597	300.9	92.6661		170.522	129.437	124.308		395.453	182.212	194.48		180.678	233.912	192.629		340.455	151.089	268.121		180.761	245.072	102.172
380.777	304.561	92.3237		176.683	138.225	84.9955		397.594	193.767	186.149		175.727	272.612	203.307		343.75	158.516	272.115		197.139	281.118	73.6597
398.428	343.492	126.067		182.715	95.8305	138.113		392.413	167.831	169.112		163.006	229.199	152.207		352.006	203.984	246.468		201.949	262.803	101.568
414.608	291.293	88.6305		188.331	140.83	84.8487		401.045	171.927	207.255		170.344	258.991	173.312		340.04	159.774	263.733		184.014	245.879	107.161
384.134	285.259	84.1259		175.046	141.114	100.527		393.731	181.242	159.515		161.773	260.986	158.484		354.995	180.317	270.905		202.069	256.055	75.0079
399.277	335.736	115.308		200.649	108.176	138.621		213.029	135.667	85.0796		162.31	267.967	169.34		349.458	181.457	263.757		198.194	260.68	74.7393
397.289	338.28	111.229		185.823	115.195	94.9283		203.1	131.128	117.412		160.662	249.114	164.403		361.459	174.005	259.099		180.232	248.866	119.579
396.775	326.034	88.9931		177.626	116.619	90.3419		194.697	130.347	126.772		166.349	287.527	189.869		359.237	158.618	252.687		184.397	286.361	101.826
389.33	319.78	96.8233		181.952	136.441	85.5581		189.071	135.065	117.57		170.995	223.34	169.045		347.482	166.291	248.778		176.985	298.738	137.449
409.863	337.792	95.8872		198.469	94.5029	134.71		201.464	109.678	137.188		170.349	255.816	197.205		352.027	188.86	265.457		188.266	276.556	90.3834
376.214	285.737	100.546		176.911	96.4832	124.938		214.677	116.325	101.031		188.453	274.971	183.366		365.942	192.246	265.62		186.437	271.298	120.192
371.263	286.018	71.8179		203.3	131.538	95.2592		209.072	121.041	133.173		181.693	245.683	194.336		342.196	157.325	244.275		193.001	253.418	83.8048
395.826	284.187	93.3056		183.321	97.595	119.191		222.991	116.434	101.216		181.455	267.611	181.802		341.722	162.624	256.918		190.418	281.539	113.33
411.939	291.737	84.4866		173.555	122.379	129.639		193.387	130.785	107.826		161.138	282.754	178.749		345.368	158.579	260.272		184.764	300.748	97.4265
394.308	326.243	121.847		185.42	106.142	146.187		201.986	133.719	108.436		164.763	278.309	181.154		340.829	174.467	251.637		191.449	259.675	83.0622
414.99	291.091	77.1402		196.092	106.901	119.707		184.249	118.878	100.752		175.808	229.661	176.36		339.767	155.162	250.465		169.789	308.233	125.501
380.949	289.546	101.14		202.365	117.957	149.615		190.745	122.733	138.037		185.202	259.792	193.923		335.634	177.886	242.958		186.755	269.461	83.4633
408.26	299.133	89.0597		171.513	122.757	119.634		195.299	126.198	137.67		160.767	280.097	197.073		359.057	168.554	260.829		191.283	264.052	101.812
374.201	302.778	104.237		183.732	97.3633	142.18		185.625	110.991	126.716		178.639	281.986	194.099		335.209	210.617	258.717		182.518	310.953	113.101
407.414	319.871	112.548		179.07	126.88	129.828		213.263	133.677	101.869		170.572	239.6	172.959		368.057	185.583	251.733		184.182	268.753	75.0539
400.831	299.475	97.5554		178.698	112.47	134.511		200.35	121.385	118.149		160.447	279.272	157.823		353.398	149.52	259.351		182.422	296.594	137.225
395.701	309.004	103.924		201.885	116.703	134.229		197.983	150.447	85.8467		215.073	138.934	211.91		356.998	188.262	262.127		187.264	254.781	90.7644
370.045	322.81	127.428		195.128	124.219	85.5427		211.086	125.336	118.367		225.674	137.654	223.633		333.73	150.925	258.547		177.075	263.267	113.724
397.428	323.106	96.9749		178.304	94.1248	138.868		214.621	126.324	126.442		228.402	138.613	215.707		343.849	176.198	264.007		186.393	301.204	73.9272
371.911	328.192	115.974		172.887	125.563	78.0708		197.66	99.0392	141.553		198.606	135.294	217.213		349.233	151.344	245.963		193.887	310.873	137.206
411.63	293.277	71.4408		169.948	116.797	145.607		223.418	136.624	86.3303		219.195	132.198	216.952		341.552	175.074	277.678		175.516	252.354	119.536
392.94	305.322	93.1504		200.497	127.205	85.712		189.779	149.987	137.086		373.14	70.3767	44.579		349.961	200.579	268.461		178.448	265.498	125.625
373.905	316.54	112.553		198.41	132.325	85.6945		214.557	139.932	94.7379		224.235	144.05	144.556		337.117	212.582	242.434		187.215	255.62	83.8308
403.32	319.138	93.4879		188.986	96.278	113.563		206.382	143.756	93.9439		228.816	132.669	182.503		343.305	175.315	271.111		183.186	294.146	102.042
413.376	296.72	79.0574		196.145	128.423	90.9136		212.588	154.274	95.1948		214.861	143.421	145.922		338.965	167.388	259.384		197.841	297.055	101.683
417.418	316.619	72.2731		174.515	94.2888	130.266		197.816	128.069	132.91		229.353	141.623	173.112		334.362	156.167	246.743		178.443	284.108	119.916
348.542	286.188	88.6048		193.628	122.519	78.9756		215.863	149.585	85.4972		219.484	142.081	148.525		349.564	178.736	258.944		198.979	297.375	137.76
410.022	290.634	78.4729		176.622	111.913	102.545		213.402	131.395	132.84		224.4	134.73	184.399		351.937	163.172	246.983		185.906	290.043	125.892
396.261	303.684	85.5334		175.911	124.395	102.351		187.411	131.89	133.08		215.869	139.392	185.177		349.995	208.442	252.245		200.272	304.987	102.198
412.573	287.709	72.2422		172.003	92.6803	138.912		222.453	120.91	125.586		220.34	136.111	197.35		357.315	165.993	249.316		193.651	297.424	138.741
389.294	294.04	89.785		169.474	119.893	138.884		188.09	136.377	103.939		229.586	134.8	177.291		350.592	172.076	248.768		173.496	276.414	91.1554
407.488	293.042	93.523		181.787	112.38	103.659		204.728	142.413	86.617		215.632	142.173	178.309		349.148	164.298	273.196		204.11	291.477	97.5415
384.967	305.365	101.783		196.157	121.482	91.6637		211.107	136.017	137.963		211.304	129.27	189.079		365.596	162.693	254.779		185.515	304.061	138.208
399.799	329.65	123.935		197.419	107.828	142.367		221.001	139.525	141.871		372.775	300.58	222.095		346.695	171.398	254.971		188.944	243.924	102.435
398.076	330.046	117.22		176.525	88.3268	147.181		194.443	114.684	109.05		381.181	298.991	213.441		355.893	199.238	265.304		192.479	304.488	137.946
401.072	313.584	101.297		196.161	97.4943	130.88		198.229	120.883	133.283		363.05	297.355	223.577		359.665	175.994	253.91		198.14	280.345	106.879
407.976	335.13	126.665		169.784	116.758	102.843		197.118	132.338	95.6716		354.363	308.392	222.821		351.688	191.494	274.053		189.316	290.829	107.214
416.44	314.543	104.931		181.173	99.2206	146.285		202.934	127.835	109.666		359.078	307.466	215.903		360.257	179.399	269.194		200.299	314.007	82.9964
407.659	308.708	97.571		187.546	139.127	92.3356		222.19	120.312	138.044		381.362	303.531	215.904		334.635	149.07	262.619		178.801	312.486	118.674
371.56	322.947	117.393		195.211	118.961	141.965		191.71	128.581	133.11		362.794	298.205	229.339		336.639	196.674	254.747		175.773	289.086	132.519
392.809	288.8	90.4791		191.045	101.432	114.513		200.826	119.528	102.021		384.302	301.245	229.407		353.11	174.732	242.853		171.272	252.872	125.47
411.512	305.321	79.462		184.781	111.411	121.039		202.221	140.39	127.311		361.027	296.894	234.794		366.466	197.977	249.875		184.341	281.966	113.304
360.679	288.064	104.915		177.947	133.425	126.173		204.479	120.367	109.848		67.9171	209.604	49.3642		340.043	152.703	260.711		183.017	286.587	138.289
362.09	294.139	118.67		177.196	115.446	114.749		186.324	146.993	133.309		58.6967	212.262	63.9775		354.571	212.235	255.62		171.63	263.199	107.686
395.49	290.04	86.0011		191.038	133.986	92.5809		192.944	133.114	89.0249		66.2729	209.945	53.9007		348.928	209.959	268.82		179.005	312.197	97.7523
395.535	296.497	90.6177		173.307	135.89	96.7255		192.749	142.765	87.5363		62.6209	208.984	60.8585		341.28	210.905	247.803		171.579	291.449	114.269
402.225	303.64	86.0002		178.199	103.701	126.229		217.401	134.246	86.6654		56.7903	216.056	44.6366		366.95	149.486	231.761		169.719	262.303	120.384
347.579	287.902	80.0773		173.061	88.5821	97.7898		192.75	125.029	102.587		73.0741	213.964	40.3538		358.693	212.948	242.541		202.385	280.796	102.951
385.047	334.546	117.751		182.006	108.268	126.125		184.858	146.705	127.124		72.2702	204.666	63.5434		359.545	181.826	262.818		180.467	256.177	91.5499
372.758	321.538	123.896		174.09	112.109	80.4552		188.451	152.376	102.836		65.5269	216.098	39.9042		340.771	149.619	255.921		185.01	264.258	114.62
386.712	291.306	94.8294		177.442	111.134	121.128		194.009	144.612	119.005		52.8529	215.668	61.3185		359.446	150.677	245.036		186.31	270.135	113.999
416.327	321.214	105.282		177.617	101.109	135.701		199.154	113.792	127.621		63.4424	214.641	46.6063		362.654	188.926	262.099		182.842	294.429	120.166
368.517	332.418	107.5		202.346	97.4616	139.855		187.671	149.917	96.522		60.4738	213.241	51.3556		357.467	161.778	244.823		192.946	264.939	84.1412
404.244	299.288	101.915		177.243	119.307	126.447		204.804	135.575	138.528		70.7727	206.923	54.3619		345.046	198.212	264.163		178.864	283.506	114.295
409.916	324.374	105.531		200.109	121.325	131.083		187.079	140.794	138.459		55.6638	216.871	57.093		335.671	159.144	240.11		181.472	241.117	91.7453
398.479	302.919	102.042		172.234	114.743	93.0407		193.843	144.764	138.576		64.6586	213.563	58.9943		361.529	204.095	240.294		169.826	287.565	132.446
375.118	315.621	118.953		178.67	102.423	121.735		201.203	99.983	95.6883		73.4543	215.318	62.0994		350.298	214.816	273.241		173.673	311.914	107.921
406.592	340.432	107.877		179.065	104.919	96.8837		201.172	147.206	133.833		70.0097	207.747	60.0677		347.438	179.475	244.648		187.431	249.313	84.8913
415.096	297.887	74.2955		178.488	127.409	93.2713		218.58	121.262	96.4131		58.3919	213.611	59.2684		351.813	187.038	244.896		180.134	300.906	91.7556
370.501	291.827	105.281		185.129	129.748	87.5684		189.826	137.093	95.7463		66.9368	211.729	41.7725		357.029	206.983	262.853		185.821	312.907	138.574
391.818	300.992	98.5734		176.454	99.5342	106.043		222.025	132.017	90.1786		64.3819	215.193	62.0802		346.981	189.463	255.733		186.381	255.015	115.01
364.607	292.484	105.644		171.245	137.574	87.5885		218.106	103.43	142.613		63.4558	209.134	65.4476		356.189	163.729	256.927		185.676	311.755	75.4634
404.688	325.859	94.5739		179.564	137.927	97.622		201.781	115.005	133.892		65.7214	208.37	57.7749		361.631	192.26	256.446		175.966	261.356	85.1557
409.9	303.525	86.5148		202.596	140.337	97.5161		195.246	128.886	110.41		71.5452	211.59	51.9413		351.932	193.886	268.937		190.773	289.317	120.958
411.328	318.255	105.46		194.207	106.591	93.0903		202.516	147.448	75.8434		54.9452	216.407	52.2176		342.037	168.597	242.919		178.06	292.073	138.492
392.702	296.891	95.1821		185.515	120.095	127.142		187.787	131.466	139.332		61.6657	211.984	55.1492		363.74	213.039	263.359		197.335	249.243	97.9731
405.315	289.618	90.8415		191.966	110.939	131.207		221.995	129.662	76.3588		68.0399	214.199	55.2858		366.424	153.346	247.218		184.842	293.836	77.0683
357.456	316.647	125.024		188.842	86.87	135.461		209.422	134.564	75.974		74.1776	201.027	74.5124		341.365	201.185	254.943		187.133	259.228	98.2317
389.226	289.08	86.6347		172.705	112.708	130.91		185.725	123.836	95.8651		72.6767	207.139	73.9194		339.322	181.487	249.198		171.83	297.56	139.113
414.265	310.256	98.7732		188.404	123.113	93.7273		196.705	121.184	111.125		56.1934	216.396	84.823		336.739	197.507	260.721		202.293	268.184	98.4352
382.35	312.837	101.602		181.173	120.407	130.858		198.906	136.56	138.809		59.6721	210.165	79.8263		349.438	165.699	264.345		180.332	300.035	114.702
393.962	319.346	109.637		177.196	133.839	81.5452		205.303	139.425	75.7807		59.8841	210.946	87.9777		366.714	153.341	253.161		173.149	292.377	127.04
377.777	318.162	101.878		173.799	98.2641	116.768		194.413	117.491	119.799		58.8161	215.192	79.3668		341.738	203.778	259.821		192.386	306.362	108.424
416.175	295.84	68.9332		197.223	101.792	147.559		206.072	152.599	76.2623		61.9957	213.456	91.5734		354.984	194.446	251.453		199.598	307.319	108.128
364.348	289.441	109.594		172.369	135.922	122.179		198.549	154.759	127.838		69.7297	212.224	85.7677		355.618	211.462	269.662		178.695	277.575	133.854
349.691	316.553	109.057		173.023	80.5015	143.875		218.422	151.925	76.8719		63.9094	214.341	85.9362		369.772	191.119	257.339		170.117	254.768	114.61
383.291	317.694	110.149		171.615	111.565	139.795		191.329	154.015	111.545		61.5575	211.459	75.6567		357.673	188.557	249.439		174.965	274.577	120.909
415.2	285.9	87.2375		172.441	95.4138	148.452		213.042	148.448	96.8712		69.8137	205.618	92.0908		342.94	210.454	259.238		197.124	265.838	77.2381
348.044	288.609	74.4212		183.282	100.913	127.945		189.734	112.612	111.273		70.8491	205.827	80.9383		356.352	197.386	257.985		169.231	278.498	120.842
399.715	307.452	99.4076		180.185	120.89	135.752		219.835	151.807	96.9462		74.9002	215.277	91.4465		367.094	185.948	264.416		179.373	269.223	114.777
406.896	300.34	95.7414		191.546	128.799	82.4141		187.746	154.387	138.459		65.1786	214.016	99.0721		362.237	205.231	258.107		177.521	267.052	108.626
399.005	291.087	90.754		182.658	127.04	98.1367		184.013	127.69	110.732		70.4487	208.839	99.2388		349.274	194.84	263.754		171.431	293.921	132.582
358.556	288.599	125.288		177.999	135.857	122.097		209.923	115.027	119.952		57.3614	212.396	72.6922		348.4	172.026	266.206		199.152	291.571	76.8272
357.74	287.804	99.1798		184.548	125.898	128.08		191.29	138.033	134.281		68.1412	209.62	75.4721		369.15	212.575	257.362		177.594	298.506	132.908
382.791	328.325	80.1895		172.387	131.058	93.3409		216.047	134.022	95.9545		65.7461	207.207	86.3243		345.183	202.449	247.649		177.804	278.031	126.829
414.677	335.84	119.713		172.247	97.7755	135.78		201.365	131.042	88.679		66.6914	214.944	78.3636		363.974	203.35	247.076		171.9	286.428	108.999
396.433	328.963	110.019		174.768	130.616	127.835		205.303	113.983	128.721		56.6137	215.338	76.2043		361.211	208.722	247.534		178.273	289.725	121.354
399.451	323.326	73.5635		175.128	116.762	143.975		203.125	139.902	103.971		70.1356	215.129	93.3087		355.592	205.127	241.037		181.617	303.657	133.881
391.295	348.22	125.963		171.688	99.1696	139.847		187.194	118.933	128.276		69.7107	212.806	96.9491		359.845	194.54	266.655		171.419	297.693	107.775
363.779	293.612	160.452		174.006	116.324	135.713		199.561	113.436	121.125		72.9281	212.703	100.157		355.544	177.108	261.522		199.997	313.373	133.414
406.019	344.177	135.845		186.286	112.491	140.328		199.664	144.452	88.8274		73.875	214.765	104.552		356.312	188.527	270.341		192.895	263.147	77.738
415.977	334.588	153.721		179.968	107.665	117.083		187.643	147.214	89.1751		64.4761	207.106	75.7599		354.755	186.268	255.631		185.239	310.332	126.532
367.709	292.681	184.592		176.128	120.503	98.2337		220.289	102.313	111.862		64.621	213.448	81.7436		356.693	204.528	253.314		197.344	284.089	78.1227
386.511	335.895	137.706		168.64	93.966	122.399		191.338	144.121	77.9984		59.0546	212.006	83.1815		365.182	198.889	267.531		187.451	248.903	92.9457
416.897	338.421	186.812		169.058	110.431	148.243		211.276	113.835	103.36		62.6533	207.664	84.4491		351.118	191.494	261.284		180.675	300.934	102.062
354.313	315.738	189.224		171.037	109.173	144.326		223.627	148.402	76.8885		70.5521	209.415	94.2238		342.847	193.39	257.058		204.042	247.36	78.171
401.357	342.34	187.336		202.458	125.27	94.4453		212.118	122.354	112.35		65.336	210.094	89.831		336.311	166.287	240.548		171.82	268.03	98.7939
367.042	293.518	153.512		174.845	111.459	108.867		207.032	125.01	103.566		70.1339	203.238	87.5751		337.964	191.268	259.993		177.924	283.451	109.033
386.727	290.865	171.615		201.67	138.501	88.64		211.013	112.488	96.8127		374.415	162.156	76.2105		350.926	157.489	271.335		169.594	277.318	127.569
347.537	307.093	152.67		170.74	106.174	136.125		204.524	111.149	112.376		372.581	151.195	74.6547		340.55	166.195	250.877		193.817	298.847	133.622
415.955	339.252	161.98		176.048	107.81	136.03		190.076	147.965	104.021		371.765	156.989	79.1659		365.741	166.526	247.667		192.024	273.2	115.304
352.883	310.459	137.543		202.16	102.092	117.529		203.262	132.759	134.394		365.527	163.847	79.6665		341.581	205.962	241.315		181.192	256.119	103.892
378.118	308.371	185.274		169.525	122.808	144.049		203.583	139.915	97.8427		356.692	161.463	82.6105		348.353	197.258	274.693		188.089	307.697	92.272
387.864	287.077	181.941		193.821	91.9008	148.631		200.594	131.959	129.125		358.909	185.146	82.8869		334.572	158.659	273.724		186.937	264.146	103.964
383.173	290.221	180.972		201.541	108.062	128.802		206.157	142.32	134.128		367.503	155.19	83.3711		337.28	162.783	246.016		186.962	262.233	78.9641
341.637	296.591	143.906		178.801	126.383	123.073		196.453	143.984	134.404		354.457	179.558	77.1258		369.518	205.098	258.293		203.744	280.579	78.6925
376.798	306.072	180.968		171.061	88.8155	144.951		202.607	147.539	128.998		355.355	152.987	75.6039		338.169	159.209	269.75		175.828	276.592	109.091
358.298	285.916	154.234		181.398	114.746	140.753		210.967	150.447	90.4161		361.324	153.103	77.5659		350.89	184.698	272.16		204.665	287.775	86.5345
375.722	286.008	179.38		194.073	112.814	144.456		193.076	122.432	129.211		359.637	155.842	84.1638		335.141	213.468	247.925		204.222	248.791	86.1326
408.327	338.582	138.134		179.997	102.41	141.198		188.845	139.383	90.2983		357.433	192.653	81.3529		351.064	156.455	241.234		188.307	312.621	103.052
401.509	340.15	137.508		169.674	102.492	109.18		188.716	141.99	129.503		366.85	338.651	55.2789		358.176	156.276	260.065		171.138	257.457	127.315
416.853	312.944	185.081		362.721	205.549	30.6908		223.772	111.795	139.283		382.181	306.68	46.7868		355.995	197.813	272.504		174.408	276.384	115.589
417.891	330.687	137.827		361.225	160.993	52.4659		204.826	124.37	122.094		369.408	297.372	14.1548		334.26	156.57	261.222		184.92	287.503	114.798
376.187	303.074	187.612		362.348	153.646	28.8881		194.151	149.466	90.7072		378.505	337.973	55.1669		346.05	160.445	264.94		183.586	303.822	85.5409
355.373	316.254	193.134		351.072	160.325	32.8794		193.214	106.661	129.145		379.866	315.301	41.8582		340.495	175.301	241.205		190.437	250.594	110.226
409.359	324.609	163.92		350.061	152.698	38.8709		202.679	150.169	90.2042		378.775	314.374	50.9164		337.126	185.607	241.638		182.861	260.034	109.942
350.049	308	145.1		338.609	180.986	23.2204		201.8	128.784	139.534		373.612	305.957	41.0442		348.993	199.027	254.213		175.727	269.839	93.8912
364.19	298.888	190.622		363.153	193.716	44.0744		209.49	145.663	78.74		362.548	316.598	62.1264		358.503	200.025	249.906		199.583	261.146	86.5531
397.508	306.923	185.049		337.492	192.316	19.6767		221.603	115.732	129.647		381.022	308.213	14.1522		354.522	214.447	245.634		180.577	270.092	108.937
415.228	338.509	138.7		359.608	177.164	26.3844		205.263	133.636	103.84		375.463	317.035	40.327		342.122	169.225	274.469		174.236	304.829	134.69
384.62	299.769	189.032		348.236	158.392	37.5001		187.576	127.01	90.7881		356.166	315.376	62.6787		343.854	205.69	269.94		194.45	294.2	86.4941
368.604	292.473	172.987		354.728	159.59	43.9723		210.992	135.108	90.0011		374.851	311.712	47.1763		336.146	201.547	236.103		183.764	276.976	110.263
355.862	304.529	174.017		362.87	198.272	26.6201		200.25	139.073	90.5996		381.589	334.197	55.3533		341.74	181.289	258.609		191.21	300.633	86.6014
410.353	345.681	184.449		343.967	147.218	52.6272		188.992	106.393	113.187		378.808	310.288	21.9312		344.4	173.982	247.597		173.151	299.109	103.172
362.463	299.654	176.581		336.307	184.85	39.6693		223.38	142.402	90.9698		374.744	314.923	28.0404		337.897	201.282	248.461		174.068	271.745	134.724
394.349	303.338	181.846		338.907	202.665	20.0197		217.569	120.331	121.991		369.291	329.849	46.3321		363.257	174.316	267.254		190.74	272.023	86.8941
342.367	323.214	187.854		344.907	204.473	20.1155		196.429	152.062	105.287		375.749	332.733	46.3703		335.725	150.146	253.574		190.682	288.51	93.1971
387.692	339.259	187.614		351.392	166.012	35.6237		220.327	142.971	78.0372		376.784	303.135	15.8649		362.319	187.431	268.707		194.595	251.326	104.573
392.021	339.828	181.943		343.802	207.121	26.1172		189.203	141.93	122.83		379.271	297.38	46.3043		356.196	149.669	249.516		187.266	278.501	122.452
359.252	290.884	147.495		341.852	191.536	30.8261		191.495	141.573	113.562		366.666	307.027	31.0628		368.565	208.296	248.879		179.999	255.872	116.594
390.181	349.339	187.587		364.176	174.703	37.8311		217.424	116.774	138.815		377.387	346.396	62.2973		352.51	165.925	241.534		192.685	246.485	94.1542
407.735	325.668	178.249		336.331	194.121	35.2635		185.852	113.743	97.4081		363.173	327.898	46.4668		349.765	213.67	265.086		172.222	283.449	129.036
387.152	340.753	177.53		364.88	161.039	58.1576		207.486	125.31	129.857		385.554	319.769	40.9641		358.878	198.616	244.155		191.109	282.693	104.051
411.339	340.605	147.148		339.851	147.756	47.1294		193.287	109.649	122.735		387.16	309.952	55.6118		349.915	203.853	261.735		194.854	289.164	129.074
403.665	309.901	184.878		338.692	174.738	23.5812		197.332	120.881	139.973		362.443	300.516	26.587		346.852	183.057	254.185		204.239	293.055	103.996
358.445	297.688	165.197		351.903	204.148	20.3135		206.046	130.303	130.068		358.671	302.24	34.1284		344.15	158.743	250.036		190.359	298.123	79.1556
392.556	348.149	147.228		363.972	199.546	38.4555		221.702	113.776	78.6965		376.378	309.445	25.0596		346.77	187.442	241.228		175.986	271.963	129.235
365.066	296.006	181.289		345.574	163.459	41.4211		187.618	117.034	122.66		377.217	306.508	56.4872		337.34	207.946	254.102		182.067	266.623	79.8049
378.483	291.534	178.456		355.098	209.657	39.6568		196.779	143.013	104.217		365.753	308.662	43.1244		352.526	171.98	258.441		196.286	293.368	95.1785
385.863	339.291	147.815		337.798	165.979	26.2359		191.012	129.382	122.498		368.952	303.491	25.3261		349.211	178.409	268.172		183.9	276.822	129.252
407.307	306.76	188.57		339.779	187.474	13.3885		197.787	125.666	91.5849		368.847	309.649	35.3974		367.705	177.813	250.117		181.264	314.689	86.3549
342.77	308.954	154.768		367.66	199.868	51.0355		186.446	120.154	113.342		356.016	299.412	35.9945		336.853	150.278	235.411		184.943	286.577	122.555
348.998	285.662	139.792		345.642	153.385	44.1542		197.546	149.588	123.347		384.325	314.484	66.125		365.42	166.348	260.063		175.524	261.153	104.43
368.877	306.893	188.862		364.094	168.569	33.2601		209.591	128.129	79.0211		359.998	338.642	52.6769		354.601	180.871	250		172.808	302.209	122.485
348.87	332.165	181.058		359.101	161.321	29.7846		206.906	155.382	98.976		360.536	298.147	48.5635		346.171	183.451	248.957		175.739	311.444	135.017
343.675	303.014	139.505		336.072	212.67	30.9603		208.414	119.239	114.774		372.379	304.833	53.1806		351.492	208.186	236.555		180.025	301.032	129.03
416.737	347.64	172.536		352.722	187.108	41.5697		195.797	150.172	134.571		366.067	321.721	29.2128		336.769	187.836	248.813		171.822	310.307	129.563
401.923	312.65	188.598		369.595	154.763	35.8134		221.188	132.959	80.4804		363.15	300.522	18.4695		361.845	198.85	262.96		184.133	265.166	98.8269
403.353	320.614	189.062		358.778	189.85	29.6308		215.322	145.403	80.9501		383.256	310.608	20.7891		342.12	194.895	250.987		201.415	253.564	94.7164
404.022	314.727	177.933		358.513	201.949	29.7745		197.661	136.752	105.923		380.134	315.104	36.1219		345.565	152.403	270.351		191.138	306.973	122.618
359.292	308.106	185.086		358.593	146.815	47.4875		193.882	149.883	99.5273		368.511	308.835	45.4582		346.846	186.808	262.394		179.026	277.125	104.822
361.986	286.497	179.28		364.294	160.477	27.3539		215.97	122.85	139.968		360.289	303.66	39.1573		366.777	199.69	261.553		174.919	251.752	129.737
410.177	310.907	185.856		342.538	194.224	14.3577		209.202	124.278	140.14		355.007	296.988	31.4289		344.919	164.403	269.545		174.567	242.839	122.433
408.159	293.155	188.825		344.68	198.716	50.1076		194.529	113.499	115.133		371.686	307.876	25.5243		335.516	192.703	242.046		169.581	243.576	122.564
397.62	341.146	183.256		344.87	198.442	20.8315		202.826	122.995	131.047		384.096	319.051	44.2998		358.384	150.675	267.674		169.545	271.131	130.096
382.595	285.826	167.319		369.64	202.496	36.3779		198.226	118.001	114.866		372.461	338.8	57.9706		340.128	198.72	244.1		172.398	256.255	122.475
389.611	344.782	166.871		342.482	156.059	29.6864		204.055	138.582	80.4775		375.232	303.076	36.0176		346.616	170.951	270.379		183.429	273.205	94.4642
414.528	305.595	188.801		361.376	183.807	47.8593		189.637	135.69	123.916		371.323	309.352	49.6409		188.84	252.141	216.304		191.601	293.606	135.764
405.593	346.439	156.06		365.01	171.235	44.6788		204.809	143.291	140.488		387.393	335.78	58.1133		190.747	237.606	198.926		201.858	302.066	135.034
415.052	345.581	148.283		368.017	202.175	31.1534		186.833	108.108	99.4972		356.762	311.752	54.0463		201.056	260.299	216.069		201.099	287.032	80.2608
383.39	296.161	182.301		368.23	155.062	60.0066		185.248	137.544	115.104		381.699	312.227	53.8959		173.682	255.418	158.456		191.611	302.837	99.0806
418.48	332.636	178.931		352.863	175.672	45.1752		218.948	113.972	106.629		355.55	315.983	36.0811		188.986	222.993	189.584		201.315	256.574	87.8983
385.37	306.598	183.078		351.627	212.148	47.6161		193.598	116.963	140.623		361.282	302.636	30.8685		178.559	241.695	211.7		189.668	294.357	129.596
408.622	296.806	186.03		341.433	191.954	41.884		206.522	154.668	91.9954		387.637	313.668	18.2348		186.499	271.053	158.78		195.964	296.379	129.21
418.278	342.342	173.786		342.206	160.744	26.9489		207.487	137.747	135.343		359.409	303.367	44.4958		183.94	240.612	207.056		202.174	253.725	81.0146
417.751	337.065	167.884		369.649	203.068	41.9385		210.631	138.347	81.8527		364.038	304.107	48.7917		178.104	277.652	170.683		183.277	253.927	95.2891
416.052	335.688	158.531		335.762	188.394	33.4009		199.22	150.618	131.466		373.4	314.682	31.3742		198.65	284.661	216.065		177.501	297.089	110.136
390.31	340.474	158.462		355.756	150.96	39.9039		195	146.57	82.6332		358.459	298.121	27.0358		168.931	245.814	184.188		195.937	262.906	100.136
350.497	319.859	191.642		365.685	209.884	45.1872		184.317	122.149	106.398		368.87	302.872	20.4008		170.729	228.118	165.979		75.0776	320.631	199.143
396.246	317.464	184.147		366.805	148.925	50.8926		188.962	115.431	115.443		384.606	316.89	50.6628		171.116	257.276	153.156		406.002	350.336	229.192
395.904	298.692	179.436		348.191	209.397	21.3076		191.915	155.463	83.2836		361.756	332.983	48.9691		192.507	232.681	194.467		402.296	325.854	224.363
370.857	286.856	169.062		346.131	150.384	24.1109		184.485	143.096	100.193		384.779	316.281	59.0747		182.554	262.853	158.736		411.532	360.111	223.649
365.243	292.149	168.787		351.785	196.895	29.8257		213.564	119.128	106.983		378.764	309.389	53.9159		199.865	275.324	198.571		377.893	336.584	247.997
415.482	345.621	158.031		340.839	181.097	15.7782		210.678	141.447	139.815		361.779	295.754	26.0584		181.626	231.169	184.52		404.614	320.853	224.146
363.627	289.528	174.905		344.625	197.141	36.3359		185.376	128.15	123.353		370.696	310.255	38.8495		168.323	224.597	172.193		379.387	335.074	250.323
391.322	343.963	150.63		345.684	163.211	51.0009		189.959	123.426	108.611		377.909	309.022	31.8396		178.018	284.459	198.476		413.787	356.054	219.724
348.793	327.056	191.218		351.716	158.678	22.0493		214.133	129.669	82.9313		374.892	307.291	60.541		168.903	255.827	184.418		391.009	356.935	219.963
359.108	286.205	142.482		336.777	177.451	39.7337		207.261	134.399	83.0239		381.802	305.185	27.425		179.648	278.293	194.482		396.101	340.061	254.426
402.591	305.344	183.546		342.173	210.872	27.6494		207.446	150.485	83.0448		386.469	307.22	21.0561		170.004	267.489	207.124		383.968	328.386	220.058
398.452	343.13	142.117		335.822	168.844	21.3373		216.63	148.26	92.7808		365.863	341.889	61.0853		194.077	281.536	215.876		404.382	352.589	236.329
405.739	287.637	191.698		342.327	177.835	21.5642		198.931	108.925	131.383		375.498	308.236	21.2396		180.876	244.815	203.011		387.492	340.993	262.179
405.902	344.535	141.775		347.103	156.26	53.9887		210.247	145.696	101.021		367.834	150.33	61.0231		177.848	234.48	212.544		397.912	320.855	226.956
391.132	341.224	134.567		344.409	149.256	37.9084		188.88	116.975	141.069		379.189	152.345	60.7343		179.257	252.244	172.708		397.881	340.913	263.292
381.625	291.476	192.247		339.042	204.897	31.7243		207.317	115.074	106.765		369.186	160.678	64.9462		180.775	244.205	166.495		383.503	334.046	263.044
418.919	343.781	135.19		335.498	207.49	39.8776		192.844	120.393	124.454		356.293	172.371	38.2722		203.735	263.306	202.934		395.238	354.886	216.923
402.833	349.272	142.006		358.308	209.929	54.2316		193.413	127.85	116.282		375.584	167.439	50.3753		194.384	286.086	152.826		380.597	335.015	239.714
395.115	343.08	134.863		336.663	172.299	33.7288		189.657	110.567	106.908		372.56	185.742	49.2837		183.423	236.582	179.03		405.551	351.578	221.417
382.007	290.342	174.607		370.639	150.125	62.5579		193.467	131.924	100.665		362.013	164.043	44.0022		174.693	264.842	166.804		389.629	323.566	221.576
411.898	349.342	149.98		360.801	184.026	27.7447		190.386	151.289	125.072		380.153	162.397	46.4158		190.386	228.287	216.724		399.882	340.214	240.229
358.091	288.425	185.765		359.32	155.597	47.8546		214.453	131.436	141.033		363.113	169.844	53.1525		171.4	285.382	165.687		396.524	350.635	227.496
415.247	341.514	180.024		337.358	179.209	33.5394		223.43	137.553	92.9634		387.777	157.308	50.3075		196.978	223.74	207.487		403.154	329.701	218.424
410.578	337.101	191.154		355.73	202.088	37.0317		187.176	126.551	116.967		354.362	174.557	55.708		168.483	282.505	202.24		401.756	339.26	264.104
415.973	321.644	175.426		354.636	201.587	51.4116		205.443	128.192	136.38		355.957	177.334	59.5026		178.961	240.054	184.869		384.24	357.337	222.204
413.231	345.433	135.712		339.921	210.451	36.5497		189.232	123.48	132.121		379.266	154.731	56.9539		180.452	283.031	178.345		407.611	335.077	228.197
392.961	342.865	191.05		340.039	160.411	39.9958		201.292	141.479	136.336		372.547	154.567	46.8077		174.291	224.888	203.412		413.02	343.649	218.319
383.115	311.394	188.779		368.928	165.489	43.0261		186.887	104.561	107.454		364.652	167.629	32.8338		183.422	262.313	185.055		392.213	337.244	266.197
389.685	287.243	175.186		347.099	191.599	38.3537		187.647	102.794	100.138		364.693	160.321	39.2636		185.475	229.801	212.807		402.819	344.093	228.751
412.817	327.379	170.317		367.194	211.648	54.9392		191.401	153.079	132.055		359.851	171.34	32.396		174.297	272.852	216.876		408.906	340.225	222.938
378.516	301.458	192.551		365.167	178.96	27.7872		206.592	133.115	92.7005		360.73	156.928	61.6244		181.056	274.94	158.889		408.414	338.408	271.591
409.548	319.076	174.692		363.779	196.659	30.5833		210.332	126.934	108.444		367.156	163.082	59.0503		178.625	283.177	172.252		382.514	327.75	51.8537
408.746	324.499	189.544		338.217	182.319	28.1423		194.703	131.801	136.548		385.176	167.669	57.4956		193.829	253.069	190.365		401.14	330.249	44.7385
386.532	339.629	151.199		358.338	148.186	64.9178		203.971	120.193	116.973		362.905	167.976	61.2613		201.619	242.424	195.273		386.013	321.854	21.1774
372.574	285.329	187.088		341.732	172.182	17.467		203.993	104.35	118.166		358.999	175.411	47.1324		198.521	245.573	212.723		397.373	332.24	61.3689
413.381	343.074	189.447		368.128	164.864	36.7093		221.132	106.229	136.678		370.547	180.404	55.6782		174.808	264.55	194.098		410.535	326.468	32.8293
378.619	292.419	185.959		339.396	203.682	38.2287		194.492	154.702	118.202		373.4	161.426	45.0194		173.73	243.279	185.214		378.751	335.483	49.3722
366.574	290.205	143.489		352.923	195.926	42.3776		207.665	132.906	141.632		367.93	164.696	35.4438		192.422	272.208	195.643		402.408	336.25	49.0068
78.9087	144.573	191.028		349.882	197.38	17.6737		195.79	141.013	126.097		359.547	164.117	35.4104		174.403	271.473	154.34		403.552	320.649	57.2063
70.5106	161.457	189.819		345.917	199.981	28.3378		217.669	133.353	136.335		379.626	171.115	60.7897		187.148	272.041	185.169		380.316	330.446	62.055
64.223	162.884	189.175		341.632	154.447	65.4394		217.023	154.28	100.629		373.332	154.925	41.1899		196.056	227.271	213.068		382.166	323.885	42.0737
73.409	175.735	166.101		354.554	207.781	28.02		209.719	117.221	125.845		368.687	170.149	63.0451		200.032	282.415	153.175		396.887	324.047	42.5954
56.3448	187.449	176.058		350.07	166.313	22.5529		209.62	128.018	125.825		361.958	174.768	57.841		179.85	247.459	191.085		397.948	328.064	35.5659
68.7049	194.388	171.734		348.517	209.829	55.1254		205.244	265.43	178.07		357.866	159.453	54.6051		190.761	244.209	199.28		393.358	323.248	53.6135
75.0122	168.314	163.231		341.235	146.721	38.1733		204.879	257.103	189.377		363.44	159.135	55.386		199.944	253.202	190.597		382.567	332.997	56.9353
62.7487	151.311	185.067		352.541	152.732	24.7739		201.667	280.127	179.865		360.623	158.988	47.8802		168.536	258.733	159.822		412.717	321.985	42.9919
80.3832	172.567	163.807		341.286	207.973	17.6176		188.835	285.674	164.747		380.371	160.611	55.273		183.422	260.712	154.454		383.593	322.129	49.4849
76.6225	170.887	157.442		357.48	148.27	30.3261		194.57	263.365	164.989		360.285	169.541	45.0644		193.918	252.851	212.247		389.63	327.454	54.2528
72.6825	179.416	163.531		339.438	209.053	48.4149		207.21	270.31	182.063		364.606	175.572	47.3895		189.908	271.428	190.503		383.316	320.342	58.6203
77.608	181.317	156.778		356.05	202.433	45.7705		202.275	274.665	172.986		354.449	179.032	43.2021		191.912	228.271	208.305		404.171	347.267	42.6011
62.6655	159.038	175.64		368.874	211.067	37.4908		186.628	275.636	178.739		360.693	165.672	55.598		202.101	251.012	203.816		378.247	324.863	23.583
61.9445	164.398	184.254		350.512	152.655	32.3777		203.24	278.221	185.325		375.813	175.47	61.8193		187.207	285.521	154.071		378.622	327.452	58.6622
39.331	173.246	191.476		357.571	160.215	55.6763		185.032	281.269	182.235		364.894	171.507	41.3237		178.936	245.354	185.697		404.033	330.694	55.3201
45.5655	170.111	184.362		361.24	150.908	34.305		212.253	255.17	184.913		356.953	153.715	55.8008		199.397	260.423	208.226		399.03	333.861	55.093
64.4118	188.693	168.989		365.968	207.522	52.2991		201.028	270.7	165.084		378.087	155.093	65.7629		176.042	248.664	167.571		407.103	322.253	50.6507
36.1221	202.074	182.672		340.097	153.693	32.351		192.508	249.03	199.928		362.275	156.518	42.2108		193.136	265.072	196.116		405.859	332.623	60.0838
78.4931	161.589	166.792		369.336	161.044	32.5382		203.515	262.621	182.533		370.018	168.131	43.0811		192.204	286.822	167.22		389.344	324.27	59.4716
78.7422	168.365	178.613		359.339	164.524	38.8117		194.077	287.648	161.767		378.863	153.565	46.7793		173.444	277.944	195.855		383.508	335.983	43.5657
44.9904	168.524	188.048		355.247	152.895	48.3762		192.404	273.827	157.149		372.243	161.616	37.1881		182.113	223.14	203.903		390.309	331.265	38.8367
71.7665	147.466	183.401		337.639	209.196	24.6326		195.234	273.563	170.175		363.288	165.061	38.1417		202.773	228.141	207.956		402.562	334.551	24.5264
70.2239	153.997	189.079		348.101	168.964	40.8145		200.016	270.889	182.128		359.742	165.019	49.2933		170.552	273.152	160.332		386.296	326.526	39.3756
80.0962	167.588	164.199		347.666	174.673	32.4443		207.78	264.684	161.871		362.988	182.042	60.5087		196.594	237.631	204.43		385.178	325.302	64.3071
63.3424	179.766	166.497		350.608	146.426	51.6475		184.875	269.192	150.036		362.221	153.341	49.7086		172.653	276.64	173.677		387.089	330.211	44.0568
80.9734	149.59	181.39		357.102	181.019	30.7992		207.82	269.207	175.659		387.459	188.495	61.5651		196.676	246.487	191.569		386.115	330.02	55.3283
75.9485	152.832	180.834		345.162	184.736	40.2194		203.999	268.068	184.903		383.76	191.127	60.6119		183.887	227.437	180.419		395.185	327.226	65.2334
80.7281	165.205	168.714		358.308	153.434	69.4261		201.042	269.827	175.803		372.663	155.745	63.8979		171.649	249.509	154.987		397.855	322.147	48.7535
75.8216	160.983	180.839		355.13	190.683	40.8445		214.758	281.719	157.183		381.694	157.262	42.4775		176.892	262.547	161.129		401.301	331.561	65.2552
73.6902	150.96	191.29		357.496	158.215	37.3565		188.928	268.136	178.905		356.084	153.103	49.8733		169.267	265.746	161.155		380.156	329.566	44.2257
75.1789	157.692	183		366.302	157.343	51.9877		186.711	262.227	162.747		198.197	231.573	99.2873		175.398	268.727	160.831		391.878	342.131	51.5373
56.9668	162.686	180.976		358.703	206.135	40.5485		190.471	278.336	180.457		219.565	224.862	117.927		188.564	285.93	217.021		405.298	329.924	48.3233
66.5875	172.262	161.11		338.045	146.745	28.8579		200.382	275.576	178.992		215.661	246.414	129.417		176.491	247.269	180.367		232.916	152.663	44.6287
78.9496	147.04	184.856		336.275	189.743	24.8576		187.668	267.475	168.999		216.834	242.459	123.498		173.238	260.361	190.743		230.946	152.138	66.4047
58.2356	159.876	191.425		362.846	167.762	37.5888		222.169	273.256	150.002		204.456	287.664	116.526		173.319	264.351	154.52		222.621	145.418	55.5132
54.9999	185.09	169.061		357.025	183.025	37.2389		212.338	274.587	171.734		222.587	246.728	130.404		201.01	223.415	213.477		212.431	146.915	87.1122
41.3825	188.825	180.784		341.003	164.754	18.469		186.634	253.021	200.997		211.81	286.892	130.06		199.059	263.087	191.389		224.038	152.731	108.396
76.0401	176.739	157.841		339.608	202.197	24.9169		208.94	264.869	185.359		212.318	256.508	118.842		183.296	263.74	191.552		210.728	148.678	129.378
50.4259	162.665	191.12		366.288	208.98	30.7488		194.038	268.424	190.255		218.904	252.631	124.254		179.398	236.513	174.346		212.194	153.324	122.736
70.4965	178.472	158.055		365.79	206.815	37.39		212.467	270.538	157.774		223.794	280.118	134.428		195.079	261.344	199.454		218.751	146.504	83.3094
53.7128	164.386	192.101		337.628	150.306	25.3555		186.792	274.997	157.62		224.612	224.44	125.113		183.876	236.864	195.733		229.709	135.919	75.7976
59.7901	166.665	191.965		363.253	152.889	46.3928		202.761	245.315	196.808		213.371	249.013	119.466		172.966	237.807	208.918		222.566	151.945	83.1888
42.716	170.651	191.198		368.153	157.964	40.96		220.93	262.362	171.243		198.267	257.919	104.274		198.006	248.32	208.535		221.744	153.039	98.1573
72.2909	163.452	178.253		355.555	156.868	32.4906		214.468	268.397	153.076		207.064	252.451	113.724		169.706	271.563	167.725		214.148	148.56	76.1694
66.5364	169.17	163.943		340.347	155.76	22.8199		198.15	251.409	196.772		202.587	233.464	109.429		181.636	270.682	180.437		233.097	155.737	110.807
67.8661	163.434	167.149		336.02	162.952	18.7779		196.113	262.258	179.341		200.678	252.177	115.128		190.153	264.221	203.339		238.769	152.775	123.952
68.4409	167.039	185.131		365.072	172.968	32.5099		185.486	259.821	197.206		211.554	227.324	110.194		175.462	278.547	161.444		223.975	148.025	76.8453
76.4274	192.125	157.945		346.139	161.539	22.5631		194.915	262.391	189.989		201.161	258.382	109.686		177.22	235.878	180.545		232.45	150.058	114.197
61.053	169.126	184.681		358.348	177.5	41.5634		217.465	270.651	167.026		229.726	245.423	134.158		173.585	282.806	202.987		231.561	146.905	76.8233
31.6489	184.619	187.199		363.299	182.576	41.3248		194.723	267.323	174.123		42.2752	333.618	51.5316		174.943	257.677	174.91		218.615	147.345	126.004
75.854	174.144	176.184		339.366	158.461	28.7967		211.432	270.391	173.747		46.7264	313.35	37.6779		178.734	267.417	186.796		216.293	153.11	126.546
60.6184	176.55	169.717		355.069	207.366	34.3926		217.026	269.736	174.398		46.2454	335.003	63.9252		173.214	241.118	191.082		213.628	150.723	115.728
62.0121	149.495	190.432		349.753	160.824	43.2596		213.179	267.001	179.582		59.9168	317.123	34.6755		203.399	245.92	213.886		221.509	149.313	116.854
64.6692	152.896	181.697		347.319	205.227	41.0197		207.425	271.748	169.094		52.6184	298.646	35.1521		181.609	260.391	199.869		235.214	150.766	128.029
78.6346	181.552	167.061		348.294	208.003	32.5991		219.704	263.357	176.834		59.2752	302.515	32.3176		200.025	281.263	197.168		226.845	149.614	85.5305
65.2924	183.563	166.926		338.525	197.705	25.5267		201.184	270.172	153.183		67.9737	312.269	34.8835		178.551	257.426	186.733		230.41	149.379	119.577
29.6739	200.089	185.135		337.772	160.298	46.2397		196.566	246.127	197.399		55.0434	323.854	39.4198		189.236	286.157	161.723		232.6	150.781	92.4961
59.526	184.518	166.941		356.477	202.159	23.4019		192.987	268.759	155.619		53.2577	321.55	43.8127		177.433	265.027	214.268		228.249	154.089	94.8867
77.294	177.655	162.086		341.506	186.318	34.7299		207.825	269.642	155.955		59.5042	323.553	42.6102		195.646	270.24	199.106		411.332	325.296	207.946
67.432	179.137	160.99		349.386	205.778	25.6227		207.319	278.08	177.22		52.7881	321.292	34.8066		181.514	230.203	196.882		378.753	322.743	195.626
48.0816	194.826	178.669		356.359	194.93	35.2858		186.949	260.51	184.796		71.436	327.836	52.1754		186.304	233.136	196.226		401.215	360.338	148.63
61.389	196.443	176.517		349.52	169.101	46.6452		192.153	260.343	153.486		49.0241	302.062	35.0281		188.813	265.372	155.543		410.577	365.096	177.618
58.5793	192.376	169.84		345.13	199.207	43.5327		210.956	288.727	152.35		44.3334	318.618	32.4244		186.449	260.407	161.591		412.832	355.429	208.325
53.6606	161.676	187.374		346.603	188.463	46.1791		214.931	258.304	181.215		62.3429	334.156	45.3666		191.57	249.399	197.053		381.1	334.369	200.065
75.3429	151.728	172.202		363.304	212.192	39.3533		204.325	276.208	167.307		49.6371	324.697	38.0816		183.348	253.632	197.085		407.734	330.307	200.162
67.4486	157.857	176.31		362.515	197.376	46.4978		188.173	275.271	169.659		58.8354	328.955	39.8577		168.642	278.77	155.559		395.688	331.767	195.558
66.9392	147.207	186.229		171.903	220.596	86.3556		200.112	266.661	167.917		47.7455	325.935	49.7817		192.882	245.391	210.582		397.491	360.048	208.545
64.5236	158.272	183.43		173.121	276.627	87.2521		190.751	254.175	188.069		47.2126	323.462	44.1119		169.741	236.204	191.914		393.374	361.918	160.597
37.2391	191.858	187.308		170.779	221.014	115.133		184.144	243.467	209.218		54.1906	336.939	60.7383		173.213	237.391	175.654		397.07	330.671	185.051
42.4581	183.279	181.452		191.117	267.481	139.881		191.93	260.46	183.316		66.2378	320.479	40.4402		184.99	240.712	187.434		395.708	362.205	151.047
75.0491	157.743	170.015		186.225	270.158	79.1532		187.631	268.507	158.014		54.2673	313.782	33.2162		175.693	247.285	175.339		403.223	329.852	185.364
41.6685	193.312	187.754		191.158	252.693	91.6179		219.085	270.931	156.322		56.6912	319.357	33.2869		193.106	286.64	204.673		400.75	322.63	191.729
35.6152	182.602	189.994		168.97	253.293	91.5861		197.283	279.723	159.855		47.3775	334.815	49.7004		172.573	221.068	180.944		412.929	336.386	204.816
80.8724	161.063	169.755		171.821	261.608	105.241		210.725	278.326	166.009		69.9765	329.39	43.8083		201.886	266.477	196.964		393.324	331.808	205.737
58.189	161.951	185.344		179.224	277.416	114.999		186.151	264.054	151.778		71.8763	323.957	46.2082		183.187	266.961	217.259		379.843	330.998	209.74
26.0232	206.723	187.007		183.88	271.467	97.0628		208.558	259.673	185.727		44.0896	323.167	40.871		186.713	247.546	187.35		409.782	356.74	195.865
78.5758	179.306	153.159		180.254	273.875	121.207		208.926	253.089	188.732		59.0803	333.139	53.8791		169.72	268.225	175.596		403.251	364.919	166.888
74.3226	178.745	170.445		184.056	282.49	87.8979		190.948	274.767	184.268		73.9467	313.677	38.4762		176.465	280.537	182.069		387.794	361.899	155.787
28.0482	188.238	191.781		178.66	247.99	86.0818		193.177	278.345	163.848		73.5866	317.221	35.3154		178.222	260.459	156.229		409.418	343.801	157.049
58.6829	180.092	176.915		193.979	275.113	121.932		209.242	279.668	172.352		67.9572	332.789	63.5655		189.956	286.596	181.342		412.881	350.612	155.671
79.6241	166.037	153.156		191.949	248.963	86.3341		192.5	254.981	198.254		61.5839	319.747	38.7313		195.752	239.456	217.805		398.159	334.694	196.29
79.7756	154.685	164.873		199.048	275.996	109.496		190.888	269.319	186.034		48.6529	301.756	30.5292		198.713	232.419	209.573		413.519	360.391	169.255
79.6339	196.369	171.324		188.341	259.853	86.0453		217.004	285.347	148.189		50.8857	326.061	65.4866		197.816	286.217	192.502		407.278	357.673	156.549
61.7166	164.536	174.588		170.673	253.509	147.604		201.49	264.897	188.805		55.2838	328.92	62.9692		170.097	246.313	205.046		400.499	369.877	168.903
33.0232	191.788	183.178		195.552	237.129	97.1998		197.013	263.83	184.759		60.5007	333.112	62.5086		185.743	243.97	197.352		390.189	367.804	156.591
52.2481	192.789	176.788		187.327	277.15	83.2712		189.979	263.774	154.15		50.333	312.845	30.5967		170.673	255.763	169.322		395.166	322.704	196.975
69.032	193.122	162.423		169.092	235.392	136.697		195.595	273.181	179.073		45.0119	313.33	30.6989		169.317	255.548	175.88		400.394	327.32	193.183
40.9028	195.196	179.109		193.127	262.907	139.999		187.94	259.127	178.702		64.5645	315.129	33.9524		173.293	260.824	205.874		397.133	327.263	203.655
43.271	194.489	184.116		188.845	221.533	83.6689		221.833	277.023	156.713		64.3389	328.871	41.3844		198.798	269.608	205.283		402.49	356.219	210.384
75.4414	193.739	162.291		182.067	238.201	79.7838		191.63	263.309	170.247		61.4106	325.123	47.4894		191.842	258.834	209.705		386.104	333.973	203.665
70.5188	187.701	158.584		170.323	237.601	130.588		188.53	258.083	152.26		48.5468	317.231	30.7498		203.382	275.839	205.255		379.133	353.191	145.956
68.0948	149.182	181.628		177.107	231.96	89.1577		187.978	245.232	204.883		66.511	322.96	44.793		178.03	262.228	208.433		395.705	323.261	206.706
43.6235	206.203	183.666		175.875	246.695	91.3479		197.442	257.492	186.67		58.3554	338.247	62.8565		169.333	283.584	181.666		410.116	335.736	202.553
67.8757	174.182	165.276		178.096	247.265	79.9691		186.696	255.155	193.82		46.6573	307.704	31.6363		171.104	223.693	213.516		410.842	325.608	188.182
71.1476	186.102	167.864		169.259	234.842	140.873		218.087	276.426	164.644		51.3439	327.291	44.3695		186.898	277.014	187.459		409.683	366.133	156.988
70.5927	155.294	182.197		198.824	235.176	89.4447		374.456	213.248	15.2756		68.7464	318.388	35.7653		178.836	229.486	175.473		407.542	363.69	197.944
68.9133	176.51	175.06		173.875	225.212	99.772		382.687	165.772	30.3177		54.6775	333.136	63.4294		168.968	226.776	187.923		409.605	335.165	189.982
78.3868	162.571	162.15		178.289	260.159	97.4787		388.123	231.591	28.1231		47.6286	322.625	34.013		196.181	243.344	201.234		412.06	333.936	207.167
68.2743	148.176	192.801		192.079	236.31	89.3606		365.296	168.704	47.3192		46.2593	330.237	58.205		185.921	278.811	150.19		408.104	321.054	198.451
78.4973	205.153	165.55		200.107	261.219	148.199		387.581	173.334	22.7289		52.7804	334.436	51.1923		173.843	252.494	182.321		413.452	336.578	175.96
51.6883	170.226	182.15		199.597	219.318	86.1956		402.016	176.346	63.3057		68.6849	300.473	34.8208		175.672	260.793	182.321		401.558	323.376	208.011
80.5521	169.535	170.506		186.735	242.3	93.6526		392.134	173.396	25.3682		59.2428	325.878	63.7803		189.209	226.454	197.635		395.608	369.267	157.11
72.291	150.986	185.194		190.301	264.501	92.2462		376.273	173.831	25.4887		64.6311	333.13	58.6712		196.322	275.034	150.627		387.064	342.165	97.4499
64.0107	176.348	161.912		176.14	267.932	90.996		372.837	225.231	16.2568		59.6095	326.282	58.5062		176.709	268.16	204.82		388.82	335.483	117.743
47.4808	174.02	181.903		203.224	269.19	106.484		400.878	166.298	63.2287		68.8208	328.036	48.3537		188.211	221.761	215.082		389.623	332.988	108.274
74.3473	172.118	170.47		175.118	235.77	97.7749		396.235	177.733	63.6696		54.8217	327.497	58.7478		192.72	268.335	151.177		378.57	339.918	126.307
71.6532	158.439	165.304		180.147	248.504	148.998		385.98	176.976	54.0075		380.936	343.68	120.253		175.726	227.148	182.954		405.465	321.881	87.2514
24.409	204.91	190.219		185.505	261.889	131.147		390.161	180.21	33.5324		379.734	362.599	132.869		169.399	274.057	150.615		387.655	340.68	127.468
75.5961	148.41	187.373		195.801	273.187	89.7266		371.963	221.196	25.715		373.694	345.072	79.3433		170.386	247.203	169.848		395.55	333.199	114.222
46.6427	191.288	176.814		179.262	236.999	86.9113		383.634	168.205	41.5476		384.516	325.856	134.906		203.499	237.169	213.722		382.125	332.872	115.391
77.9437	185.846	162.347		171.748	265.043	130.908		368.374	170.266	23.3455		376.569	324.779	83.9159		177.353	240.948	200.472		407.301	351.374	128.174
81.2497	161.345	158.428		199.803	251.9	148.682		395.802	172.002	38.5058		365.707	344.616	134.425		180.399	255.206	176.697		387.788	349.408	115.357
69.4489	149.935	188.315		181.145	228.098	92.7046		381.926	171.803	23.085		375.935	319.198	80.4308		186.156	270.009	197.262		382.995	352.897	137.058
71.7676	171.213	165.181		183.829	235.096	92.6671		368.221	172.527	55.0263		355.415	320.705	79.41		176.315	260.65	169.674		412.652	322.674	91.1808
66.3065	164.358	174.816		200.232	278.991	79.9218		391.729	230.551	36.1525		361.424	348.526	94.9168		186.156	271.863	152.171		413.755	332.531	91.094
76.4669	157.462	176.684		202.243	239.835	92.1476		388.275	227.27	33.2395		378.988	338.589	135.07		179.338	263.643	176.42		409.858	341.883	137.922
77.643	175.44	153.976		202.344	271.051	87.6112		380.371	169.822	55.6378		356.054	305.484	80.5956		176.647	283.059	187.346		412.66	324.318	76.9338
37.3016	179.27	185.303		189.004	253.283	148.853		399.678	185.625	38.871		388.164	338.64	101.988		174.904	278.748	151.774		397.212	359.832	127.735
44.8505	175.045	183.56		194.983	260.005	97.5898		387.984	175.855	33.1545		375.311	351.204	122.135		172.474	241.852	170.054		391.441	346.894	108.587
62.3557	201.088	170.353		188.817	221.5	89.6683		380.289	178.136	33.1887		361.082	340.796	72.0705		173.885	230.093	188.854		407.963	342.144	115.24
64.4345	162.524	177.797		176.262	239.439	81.9255		368.974	215.521	23.6826		378.293	330.998	135.496		177.493	236.105	188.107		403.492	352.215	100.01
54.9333	170.161	174.619		173.496	255.978	138.034		367.427	216.5	17.8725		370.645	353.863	105.097		186.714	282.115	199.534		381.551	338.656	92.6688
75.1643	197.278	165.992		180.829	262.989	86.5915		387.08	212.076	36.1262		366.617	347.374	96.4917		171.592	228.567	176.864		382.25	334.364	109.702
43.9949	200.508	185.758		198.314	254.859	92.4942		397.691	193.031	31.4032		380.999	336.354	115.994		186.494	278.439	193.666		406.456	352.066	138.898
39.4127	176.875	188.437		187.847	275.186	116.189		384.06	190.804	33.3725		381.484	347.744	73.1885		187.959	263.496	210.152		408.416	323.654	109.863
70.6506	153.699	173.443		179.904	263.24	132.068		375.918	185.082	28.0461		386.973	333.954	96.9076		177.193	257.144	151.584		403.13	321.951	102.215
70.4119	167.162	163.143		171.051	272.973	99.276		391.943	168.471	23.1346		362.487	306.51	77.4376		177.087	286.098	192.011		412.596	343.446	121.175
33.1135	179.501	187.966		176.661	244.625	138.091		381.568	224.276	31.5022		360.073	317.319	77.6677		174.689	247.469	196.795		384.677	327.363	110.505
71.7428	159.799	172.369		184.118	267.751	92.4194		366.525	227.025	44.7148		383.737	355.971	86.3012		174.571	272.681	182.553		403.082	332.554	93.4299
57.3684	169.569	179.504		170.443	245.969	141.337		369.73	172.706	41.3392		363.18	348.86	125.578		180.831	268.676	163.575		411.662	349.779	131.04
73.8274	191.608	167.91		191.634	271.199	90.1402		365.634	228.838	31.0701		370.277	353.585	117.076		198.769	255.286	198.143		379.677	338.527	104.1
65.8259	173.186	179.691		168.944	280.741	110.697		369.834	222.423	18.6218		375.218	352.802	98.0837		189.227	260.673	193.566		382.276	345.057	121.951
51.524	176.157	174.536		173.435	225.017	92.5193		384.23	231.939	43.8546		380.088	357.116	106.634		191.116	255.997	198.002		389.784	358.993	139.618
48.5591	181.301	177.464		184.381	219.852	97.8651		376.888	163.626	35.8055		377.861	355.871	126.453		189.936	240.421	205.878		409.187	333.476	93.5124
50.9676	175.712	179.781		170.692	274.153	110.812		398.76	169.898	56.0179		386.187	354.971	117.906		185.78	230.105	188.942		407.543	354.718	132.247
55.2862	174.852	172.515		172.388	246.16	132.548		366.223	206.366	27.6329		375.045	351.561	127.034		199.865	270.311	193.629		393.302	328.126	105.112
50.4763	186.515	177.102		192.15	275.579	111.446		372.051	232.965	19.1435		364.172	350.849	118.144		178.874	284.593	156.761		387.851	338	110.978
38.6203	190.874	179.204		197.701	247.238	92.7276		397.778	174.098	23.6241		382.86	361.664	127.328		182.79	260.768	171.016		382.004	336.397	132.672
35.7945	197.113	190.603		184.776	248.569	86.7797		374.984	229.768	29.9947		358.65	350.664	119.309		187.334	283.068	170.888		407.695	338.819	122.753
61.9513	182.489	162.81		200.827	280.689	102.629		368.472	167.606	66.3716		383.684	317.378	74.4916		172.518	239.59	183.059		382.283	341.61	111.385
80.2188	191.797	155.384		184.766	241.938	99.9347		393.241	180.057	22.9503		383.345	353.488	129.845		196.13	237.199	194.107		391.689	344.625	123.014
67.8791	179.593	170.38		190.531	248.368	97.7197		380.8	193.175	19.0811		383.882	321.018	82.3612		188.675	239.711	193.585		397.773	351.05	132.713
41.792	178.208	182.123		204.274	234.114	90.0395		377.262	171.668	45.459		384.086	348.068	82.1912		178.67	221.44	211.018		403.178	339.288	110.706
55.9728	201.476	173.153		196.783	251.073	82.3026		374.557	182.899	38.5483		358.192	304.864	74.8245		168.099	240.825	163.561		384.306	358.281	116.157
73.7026	163.798	168.057		177.639	259.304	81.4492		393.828	186.718	25.4296		370.457	350.781	129.539		194.675	279.635	201.474		411.813	330.973	85.1926
71.0901	145.73	190.342		175.252	243.09	143.446		390.699	168.382	48.8512		380.825	326.59	93.376		175.239	226.411	215.74		384.103	336.814	123.525
56.3395	168.891	185.79		181.299	224.609	98.9539		377.413	203.717	36.0662		368.244	343.698	82.8671		193.441	234.392	211.411		410.266	336.029	84.8764
37.1093	195.022	182.002		201.335	271.957	81.7457		371.394	176.531	33.8735		376.958	355.58	93.1648		181.618	277.145	177.143		405.243	345.104	133.88
77.7877	190.661	165.158		172.261	248.261	144.231		388.459	168.052	66.6268		360.99	347.058	74.8805		189.23	240.299	211.515		408.412	334.63	107.11
74.0901	205.483	170.669		178.559	269.13	84.4683		367.215	173.808	31.2446		370.541	355.924	120.882		188.996	270.986	215.042		378.471	332.402	95.741
80.9103	165.162	160.31		171.35	264.705	112.307		400.626	183.419	48.8905		365.377	313.77	79.7224		193.505	253.066	206.508		392.044	351.494	134.326
33.4365	188.961	188.41		172.431	244.946	103.33		399.123	179.806	67.3565		387.352	327.591	94.1588		195.579	276.525	193.973		378.838	338.784	117.437
58.8407	169.197	172.828		197.35	222.858	90.3841		389.363	187.645	34.094		359.981	317.438	84.3667		169.385	278.278	194.127		403.075	328.703	107.471
71.2552	169.083	159.631		179.775	242.606	98.3481		402.858	176.078	57.3389		366.558	348.856	101.147		203.04	287.396	215.085		393.126	322.88	107.552
70.8227	173.495	159.133		187.18	241.528	87.4093		404.61	184.065	56.4675		358.745	345.135	131.565		185.443	253.591	189.15		394.065	353.613	124.44
72.2389	186.48	162.92		191.657	259.849	133.22		369.735	206.629	32.5284		385.83	342.592	113.286		192.523	222.559	193.733		410.621	170.936	78.3354
40.1193	200.393	179.904		171.028	225.818	125.389		401.549	204.401	28.7073		378.204	333.138	145.777		190.742	280.726	205.933		51.3518	209.706	232.713
63.0087	181.955	173.248		192.838	244.892	92.8652		371.935	169.675	26.4759		360.812	321.224	167.156		201.022	285.494	206.043		49.6691	228.253	254.334
69.8663	182.515	173.489		172.841	277.21	117.853		390.422	173.513	42.2545		369.665	296.117	189.448		180.326	269.23	170.796		71.6418	212.413	237.733
76.4627	167.04	170.548		180.994	221.788	88.4007		368.657	175.403	19.5661		372.796	307.535	159.825		194.349	223.035	202.425		65.5805	218.103	237.923
72.3142	182.15	160.034		205.21	277.518	117.299		382.408	172.352	67.1321		371.503	308.993	167.952		184.105	223.379	210.911		77.7774	228.52	244.161
76.7728	145.769	180.213		196.409	237.172	82.5086		370.783	170.874	49.1417		356.817	305.966	160.833		200.581	232.062	202.35		70.862	194.86	218.317
80.6972	148.123	168.301		171.9	268.891	106.818		370.91	194.54	33.5023		362.803	324.538	147.766		180.366	276.585	152.477		61.4955	224.944	244.182
80.3895	187.451	159.99		181.695	248.677	138.812		369.146	214.009	29.0146		358.908	322.643	176.484		181.089	266.176	198.316		70.2367	230.941	249.153
76.8593	152.733	168.862		180.11	266.374	97.7545		388.574	175.9	67.2982		387.275	341.894	154.651		203.113	240.887	202.243		78.819	204.738	217.593
67.9138	156.706	169.725		183.375	243.829	82.2394		398.737	210.97	31.3511		354.989	309.931	191.916		172.779	241.499	164.943		67.2745	204.422	226.148
65.1517	166.42	166.24		176.113	264.39	99.7601		397.274	217.974	34.3151		357.266	349.367	147.338		168.735	271.311	197.697		49.1781	206.112	217.798
66.1093	172.812	171.876		170.655	260.758	126.018		382.835	178.916	26.355		388.095	325.515	147.99		188.587	280.184	215.223		59.6426	208.286	218.174
76.714	155.334	160.314		169.908	231.156	94.4036		405.06	172.428	44.6448		361.055	300.331	161.897		177.023	272.881	198.433		57.7231	216.676	233.61
80.5535	157.587	159.904		185.094	236.586	98.7112		369.014	224.247	33.4575		369.597	306.524	192.194		174.49	232.525	183.737		55.6562	211.165	221.561
59.8854	162.016	177.955		175.75	232.174	103.835		381	228.303	20.2674		383.187	326.856	148.458		192.065	231.15	190.02		51.6905	224.016	244.384
51.1269	165.502	186.696		199.298	253.591	100.154		383.553	198.019	36.3754		381.541	340.737	178.942		182.549	277.581	202.043		79.1007	195.722	218.494
61.59	169.198	168.283		176.55	256.772	101.06		381.373	233.606	32.1055		374.428	298.421	161.545		198.143	270.896	211.721		59.4916	207.201	229.429
70.9662	160.705	182.838		180.661	248.239	98.6421		393.206	180.15	29.1394		368.15	302.948	162.074		173.07	274.108	205.337		44.5605	229.621	255.923
53.3723	165.615	182.312		196.183	231.121	84.813		398.608	180.525	23.775		384.791	322.579	169.116		182.928	267.087	152.939		74.7168	200.433	222.467
75.2874	164.858	183.731		175.612	282.241	112.937		399.5	171.705	67.0977		384.673	340.749	169.655		181.919	276.427	183.975		56.0243	204.65	222.491
78.2144	187.968	171.292		192.902	260.256	90.7214		394.294	221.579	38.4733		370.393	295.825	162.105		171.95	269.945	187.971		67.2825	198.598	223.062
56.8604	180.373	167.987		171.381	239.453	139.402		393.682	171.825	67.4488		370.509	310.87	155.598		196.853	278.377	206.749		59.1958	202.012	229.541
33.082	195.628	186.69		176.652	240.444	92.8052		401.9	186.317	24.3753		359.196	296.566	178.795		181.085	258.737	165.368		45.0624	217.492	234.154
74.7036	148.716	175.913		174.287	268.725	120.783		386.974	192.835	20.0917		366.681	303.961	179.222		225.904	131.281	240.429		53.6947	213.544	227.405
27.8148	191.992	188.724		198.759	243.557	85.2121		379.757	196.802	26.9516		377.454	337.577	149.386		232.063	123.432	237.266		46.8982	205.217	222.68
36.9174	184.559	182.271		185.065	248.993	95.6136		372.865	165.95	35.0918		365.698	300.721	193.496		234.74	133.652	235.145		51.7993	211.538	218.253
59.9035	173.783	173.384		178.675	253.537	139.299		373.509	226.767	39.307		370.799	300.121	194.804		233.604	141.429	237.309		66.34	204.649	230.522
78.2027	198.221	160.848		191.058	235.244	98.6461		376.839	232.429	39.4011		361.601	332.571	148.767		237.579	113.347	226.31		62.7407	227.864	250.955
51.289	180.865	173.298		182.33	273.199	104.021		371.266	220.211	36.3158		361.069	312.341	162.489		239.797	127.645	232.022		58.025	209.376	234.878
73.5728	161.53	163.375		190.997	241.05	82.5797		366.941	231.442	24.2851		366.415	323.182	179.82		242.678	119.026	226.21		67.0663	225.106	246.159
76.1006	184.925	156.472		188.969	227.932	85.5555		402.077	172.299	49.8373		374.832	305.851	195.691		238.524	141.085	247.386		73.9646	231.667	245.918
71.9192	153.494	177.571		172.587	267.18	100.799		385.386	172.543	44.7007		379.475	337.021	157.156		224.286	125.281	229.719		47.0722	207.097	228.283
73.211	149.728	180.666		176.751	254.575	145.209		377.222	167.557	67.6942		380.93	310.684	150.241		214.611	140.784	234.861		79.3744	223.735	246.434
34.4125	174.87	190.751		184.668	278.111	100.893		390.464	189.018	20.3611		370.068	332.346	157.32		245.384	140.151	230.254		48.206	214.916	228.735
69.1101	162.713	170.792		198.039	278.872	86.3972		389.167	166.063	29.9304		369.692	338.964	150.52		237.165	120.654	235.907		67.4979	229.084	251.344
56.0244	166.232	175.855		202.976	262.229	107.732		381.494	165.16	36.5784		376.942	303.911	157.842		227.371	140.077	250.421		77.0272	196.299	228.312
75.5205	156.184	165.941		171.164	250.467	84.9507		397.083	180.448	57.8946		364.081	296.679	181.052		227.089	124.551	235.262		56.0822	221.829	241.208
71.1665	164.524	160.393		197.861	267.003	89.281		386.961	220.641	39.2804		363.494	306.224	157.907		232.481	134.981	241.848		59.6819	200.195	224.592
77.5154	152.29	186.063		187.717	267.869	85.7184		389.051	178.143	26.6699		356.981	316.128	164.215		214.597	115.403	229.4		51.4027	216.625	232.23
57.9595	154.372	187.015		178.471	219.391	96.4928		383.396	226.846	39.4917		357.461	313.46	157.916		239.454	138.984	237.512		74.8535	226.139	247.592
67.4055	167.451	178.52		188.509	224.395	95.7843		399.186	173.861	42.1182		362.505	298.768	170.611		233.552	137.313	251.598		56.3832	208.602	225.304
72.7426	169.881	178.238		198.852	258.19	134.789		381.436	189.901	26.357		372.246	334.613	150.355		221.411	131.887	232.547		45.571	212.005	224.473
44.9878	180.331	180.444		184.485	251.675	99.4535		368.847	192.411	42.6166		369.034	345.533	142.258		242.167	117.43	230.535		77.8661	211.931	236.83
63.5533	156.687	189.565		195.067	253.883	98.9429		390.096	233.829	39.3271		355.15	339.986	156.899		225.257	138.345	227.575		49.1485	219.392	236.571
78.443	159.106	189.373		201.42	242.928	96.5215		399.34	190.102	26.7741		384.373	352.43	156.718		234.586	136.319	224.364		67.7687	217.163	247.619
46.6054	176.235	177.648		172.704	243.892	79.4334		374.094	176.485	50.4753		369.413	324.265	171.562		229.509	132.111	227.695		71.1307	223.867	242.94
365.894	159.34	159.487		171.916	244.503	95.4853		381.845	176.026	50.3254		379.336	312.252	157.752		221.311	125.88	236.068		73.8729	200.465	228.482
360.001	148.117	153.114		197.76	248.972	101.145		375.826	219.085	29.1927		362.599	307.589	164.732		410.812	302.807	50.8293		77.4874	192.313	225.685
350.483	151.791	168.552		184.607	276.55	108.491		391.73	169.54	57.8058		375.201	297.99	198.48		388.236	318.966	41.162		57.7001	225.759	247.831
400.721	159.315	185.444		198.606	260.931	79.2176		399.652	224.226	37.3895		364.374	303.014	183.719		403.443	326.737	50.9287		53.5276	205.301	228.589
410.451	159.674	190.561		186.504	259.322	96.1789		398.07	176.592	34.3912		357.117	306.742	183.157		386.611	308.887	29.568		61.4671	214.097	232.649
371.671	170.552	145.305		201.395	231.653	81.0808		378.548	185.466	32.4428		363.738	311.005	171.536		411.196	331.864	66.8179		56.2823	227.955	253.432
359.169	145.915	163.55		179.194	283.015	104.713		369.41	175.968	45.6151		367.351	304.735	198.71		381.14	294.118	62.0694		63.2062	203.888	220.506
383.987	181.174	145.131		175.521	259.037	135.054		382.221	187.969	39.6337		366.42	297.981	158.455		379.217	315.461	42.9798		396.267	163.082	229.29
369.969	147.429	164.131		184.217	264.496	78.7751		372.163	163.107	29.705		371.974	335.794	142.844		392.106	308.608	31.2005		395.712	171.21	236.722
383.807	155.402	174.047		191.372	271.732	121.112		403.318	178.569	45.3773		367.644	321.182	165.282		379.13	299.772	68.6736		406.269	183.439	221.662
374.465	157.205	159.804		189.535	235.425	81.3727		375.703	169.129	29.8877		382.52	327.502	158.47		405.688	298.585	64.3843		392.682	176.221	236.111
402.542	154.984	190.855		200.753	270.088	101.122		368.705	201.93	39.9154		377.96	337.201	165.229		393.482	321.246	44.194		413.018	167.317	236.792
387.676	157.897	185.155		171.481	239.372	87.6368		396.157	181.741	43.2248		380.914	299.474	158.964		375.193	303.042	65.6867		395.727	161.717	236.561
387.051	164.95	159.73		192.391	281.143	78.8172		388.712	182.839	42.5729		361.621	298.785	200.541		405.708	309.619	68.9536		391.521	182.281	230.475
414.541	184.162	174.674		185.375	225.157	79.3303		377.56	182.673	20.5584		367.633	299.908	184.812		400.888	294.379	56.7822		398.983	169.062	229.437
408.954	168.715	185.057		180.83	255.195	81.3804		395.414	184.769	30.4603		371.557	336.111	165.921		390.066	314.212	35.0048		401.942	175.612	229.577
372.371	181.92	189.492		181.165	270.709	81.0087		385.903	164.515	58.4948		387.412	314.943	151.975		389.072	297.547	69.5632		392.506	182.801	223.215
404.478	188.526	190.845		175.193	271.708	115.077		391.933	193.308	29.8266		360.652	324.842	185.419		394.16	330.406	46.995		397.736	165.905	222.617
375.951	157.04	174.209		174.117	248.846	139.967		387.71	183.66	27.2655		382.245	336.074	152.101		411.038	325.797	47.9756		395.585	185.029	222.476
383.375	158.542	164.394		190.986	254.167	79.3074		403.975	196.646	34.5929		371.478	299.154	202.508		395.421	316.82	36.8261		410.111	164.553	237.386
391.088	150.131	185.713		196.976	241.677	98.9731		390.253	221.83	34.8466		377.831	325.583	152.761		374.904	311.62	37.7542		395.788	173.022	230.318
381.925	151.329	185.861		410.431	67.869	103.315		386.832	187.062	24.0411		364.149	337.033	165.962		378.192	299.096	50.9045		399.133	180.364	223.434
412.518	191.685	175		404.893	66.8206	148.21		374.297	163.944	58.4679		357.92	335.924	144.813		217.718	139.631	141.596		406.396	172.775	238.972
362.185	161.115	169.195		399.303	68.5287	157.396		370.576	234.916	32.2074		361.772	334.138	159.447		211.839	139.866	135.89		395.628	172.969	223.187
369.626	160.857	169.271		400.755	67.9596	165.894		380.116	179.05	44.9208		365.89	305.128	188.188		211.92	134.977	137.922		399.643	163.605	238.641
379.371	156.68	160.383		380.537	297.198	53.5569		371.361	164.368	39.5921		360.486	300.932	167.526		377.764	299.795	225.7		404.461	166.964	223.601
357.379	163.564	165.004		389.76	298.824	55.026		373.912	229.904	34.9034		354.499	303.192	167.583		406.025	314.525	228.305		395.023	163.115	240.408
401.097	158.045	179.247		400.065	302.648	55.7249		383.99	182.169	45.5277		380.824	308.94	167.541		392.497	324.757	235.45		402.794	163.959	239.172
362.885	151.222	146.555		380.484	292.883	57.3462		375.73	168.72	40.2		377.269	324.959	146.051		398.819	295.519	247.573		398.518	173.398	231.195
405.277	163.554	191.766		397.648	293.82	63.7456		397.777	233.304	37.8625		359.722	297.662	188.066		381.639	295.099	232.364		398.867	165.929	241.347
415.153	149.337	186.373		404.607	308.261	63.5365		365.385	165.437	52.9184		380.641	317.306	153.701		404.394	296.04	230.577		392.643	170.401	232.215
411.885	197.601	154.915		403.873	308.751	57.7309		383.007	234.568	27.0836		361.113	300.246	175.45		382.238	306.785	230.024		392.546	175.563	232.311
389.735	182.987	146.986		401.63	301.939	70.2491		385.23	168.94	51.4194		370.433	301.132	189.084		390.301	318.424	225.234		405.998	165.63	242.153
397.752	161.704	169.902		382.934	294.154	65.5115		367.4	186.068	43.0978		369.141	168.313	215.692		390.834	295.787	232.95		388.925	178.372	231.961
354.807	147.826	160.802		388.837	294.014	65.8107		373.614	216.098	21.1774		375.691	159.859	218.622		387.11	295.488	225.072		388.838	176.411	225.164
349.793	150.079	160.636		227.548	129.949	26.261		392.303	172.561	30.555		366.239	182.182	215.72		404.777	313.164	233.488		393.023	178.521	225.575
375.55	150.232	160.501		218.28	121.914	72.4361		387.513	183.502	37.4392		355.254	199.289	223.223		396.725	293.933	230.089		395.051	177.478	217.649
386.158	150.407	161.042		215.419	134.393	48.8797		383.993	183.808	21.1934		357.039	169.5	216.049		388.928	303.81	233.652		406.148	165.966	232.482
385.438	146.401	186.578		216.555	115.64	73.0725		382.033	208.257	31.2906		362.673	187.274	213.725		400.461	314.488	227.093		398.469	173.816	225.838
362.142	160.702	175.069		212.472	123.802	72.9855		378.499	163.297	43.368		356.357	185.566	220.035		396.606	305.496	225.922		400.232	180.039	217.573
370.641	184.8	133.981		229.319	137.976	56.2454		373.056	176.644	21.9186		368.283	174.575	213.363		377.937	305.419	225.374		396.054	183.055	227.151
378.885	160.869	155.365		218.999	138.311	56.5599		373.28	232.848	45.8295		354.705	164.809	220.936		402.077	308.778	225.014		405.231	171.565	245.247
394.768	172.195	191.416		235.347	118.583	49.6315		376.145	209.821	30.4473		359.937	170.364	221.188		394.576	312.26	225.706		400.156	167.827	244.442
388.147	178.624	154.795		241.429	109.772	39.1949		388.753	179.744	22.1099		356.981	191.499	220.553		400.843	306.232	230.994		389.505	174.379	226.962
372.948	156.573	165.032		235.911	136.235	61.6213		368.714	162.44	46.8123		356.457	176.012	213.639		408.632	299.603	228.294		393.844	169.098	228.067
376.897	154.351	147.206		240.843	121.684	43.3415		378.698	171.503	60.5021		356.171	197.62	217.285		409.476	319.212	228.963		399.4	174.017	218.123
392.944	157.516	186.766		212.921	122.533	67.4578		394.557	174.788	52.0939		357.496	182.328	224.232		412.212	300.546	78.4471		402.444	167.128	247.482
376.634	166.141	160.618		226.805	127.848	44.3903		379.19	230.752	24.7736		372.092	160.783	213.893		399.341	312.806	82.8017		409.988	169.196	246.172
412.882	166.914	180.457		212.153	111.205	68.166		393.679	232.339	30.5736		358.495	153.29	218.552		390.272	330.916	141.28		392.225	179.472	218.745
374.233	152.185	175.548		236.728	99.7863	57.7515		393.769	174.954	60.7618		355.799	151.858	225.218		385.483	323.535	141.722		395.958	167.514	235.186
404.129	146.048	192.087		228.131	121.026	63.7925		396.596	166.903	61.1252		354.65	189.151	226.316		390.525	334.174	135.41		404.883	167.686	234.524
376.991	151.009	180.417		244.041	125.471	51.2284		380.931	174.133	37.7765		370.069	160.46	219.259		389.371	338.648	116.677		389.394	179.464	228.723
412.331	163.93	170.188		225.565	120.494	45.5714		399.529	177.74	52.3033		380.762	158.479	215.519		394.903	313.229	79.5549		404.87	171.042	228.799
408.182	155.631	187.342		215.379	138.521	63.8607		373.855	173.54	37.0133		361.264	173.636	226.653		401.124	338.597	109.789		225.035	290.878	59.3452
397.163	177.257	191.67		222.489	128.41	64.1215		383.985	173.006	29.769		357.506	158.325	222.569		384.072	337.156	110.507		245.914	248.932	24.4908
373.504	154.049	170.037		224.895	97.9468	65.0169		366.272	180.351	23.842		368.526	159.66	187.604		396.703	341.303	110.229		218.252	302.857	59.8793
401.145	166.364	186.827		243.835	136.524	52.7123		392.48	179.927	37.9509		356.924	201.204	198.741		398.026	298.219	80.0287		229.996	286.29	55.2111
374.528	185.265	136.943		229.657	114.549	70.5164		387.112	170.079	34.8793		355.901	157.027	198.687		409.246	325.8	118.772		225.207	289.681	66.5717
366.852	155.884	170.238		229.882	126.6	59.648		385.998	171.329	61.4518		366.925	156.852	199.061		390.829	346.484	112.161		240.414	267.684	44.7924
395.884	152.816	192.35		237.924	138.771	54.1389		404.938	187.92	37.8211		371.393	192.452	182.803		408.014	344.61	130.108		240.386	252.881	58.636
384.42	173.866	186.93		210.804	137.276	59.7278		370.556	179.973	43.3408		360.66	189.597	187.084		380.342	323.241	143.186		214.078	292.484	55.3548
365.317	154.562	155.499		240.279	120.603	60.2385		387.364	166.967	25.45		377.276	177.883	191.98		391.656	328.319	130.8		235.669	286.26	58.2153
375.972	144.653	137.431		393.903	314.118	248.578		394.428	163.722	47.79		370.935	189.607	190.006		401.132	329.603	125.845		223.379	281.79	62.9412
400.904	179.798	187.115		397.319	301.203	260.732		382.202	164.827	47.5625		360.415	198.37	190.212		394.479	331.126	125.48		235.345	289.964	50.7624
406.787	164.865	175.298		394.834	308.734	245.076		404.526	166.535	47.3219		370.62	191.099	199.064		408.66	325.35	111.503		230.964	287.62	63.7409
413.319	158.126	181.891		387.443	321.735	238.687		396.313	191.669	22.4606		371.208	174.333	193.888		409.486	344.12	112.541		221.695	293.007	56.2666
364.259	168.802	166.514		399.45	302.166	233.184		391.231	177.207	47.7265		371.887	155.501	201.41		383.723	335.935	119.833		226.929	299.007	63.5136
395.06	146.459	169.703		396.093	298.436	256.217		365.847	211.659	44.1129		369.181	150.6	192.78		401.589	337.898	84.8132		237.018	283.344	51.1529
372.226	147.698	155.6		406.911	311.299	242.122		386.339	192.147	27.5862		380.337	183.773	183.266		411.862	325.788	126.112		241.101	283.228	45.7786
372.218	144.189	149.061		389.489	315.404	242.372		374.492	180.777	25.2295		377.211	158.484	190.285		406.481	325.87	126.337		231.434	294.291	66.579
381.611	153.406	156.09		400.621	313.77	232.95		376.226	222.528	22.2511		378.467	162.392	198.665		408.616	314.693	76.8435		240.359	244.264	57.1398
361.316	144.932	148.575		392.95	319.166	241.956		188.451	258.291	79.3277		365.268	155.857	192.598		385.938	335.858	103.586		210.868	303.305	67.6231
395.472	154.74	181.638		397.848	313.809	256.182		195.713	299.126	102.83		384.4	152.761	164.578		375.562	332.112	126.601		235.713	291.867	64.8429
376.302	177.491	138.321		382.329	322.141	241.308		219.17	299.651	103.143		371.504	158.485	192.816		407.186	296.38	77.4779		246.78	300.199	64.6395
383.216	147.883	166.625		406.274	312.356	249.087		209.87	272.406	79.8959		366.654	169.789	192.31		392.78	340.887	104.111		221.958	264.015	63.386
388.772	153.776	175.92		412.855	302.753	235.911		223.283	274.065	80.0904		382.41	178.623	168.711		376.013	326.424	138.102		245.923	272.985	37.4113
360.437	163.96	161.135		397.172	323.258	236.318		221.772	265.375	98.7318		384.061	192.102	166.996		390.172	306.63	81.9824		235.363	262.283	47.7876
382.098	144.497	181.962		399.434	301.133	267.515		200.612	280.369	94.4663		357.016	170.203	201.805		395.25	342.484	86.702		216.302	245.319	53.3112
353.737	155.549	166.101		391.944	300.945	253.281		222.349	291.968	115.248		378.299	155.757	168.649		403.537	313.443	77.8845		238.66	248.104	52.4554
384.818	173.52	149.363		381.954	298.617	235.15		206.23	292.345	126.483		377.951	189.736	192.839		396.395	336.044	120.647		225.802	253.637	61.4016
408.343	149.953	192.54		377.418	291.759	282.298		196.539	256.343	108.833		372.067	167.105	190.364		405.51	314.862	88.3038		214.785	251.03	53.1011
356.387	147.536	182.294		397.952	300.651	246.361		186.065	274.116	141.906		365.46	188.478	184.356		409.405	317.055	82.1145		244.184	262.952	52.8027
366.944	157.953	139.395		401.24	304.901	254.451		198.336	307.285	114.498		362.985	173.53	194.828		404.808	339.21	87.9179		239.535	300.334	65.9973
378.46	172.476	149.835		382.678	323.588	234.649		184.483	248.873	87.5389		380.412	153.228	181.542		410.85	345.158	138.403		213.066	304.848	62.5763
403.312	161.753	172.097		380.061	315.619	249.493		185.811	264.059	108.635		380.874	170.018	196.256		409.426	332.842	116.616		221.012	306.046	65.5274
401.859	188.171	175.624		386.442	314.989	247.163		197.296	300.367	98.1791		379.321	184.606	165.608		384.382	324.768	134.057		235.228	248.902	57.0108
405.735	171.968	182.844		391.712	299.004	262.228		202.648	302.245	93.8789		372.608	172.604	199.556		404.482	341.794	115.624		234.178	253.529	63.5165
378.472	144.161	176.667		406.985	298.557	237.542		189.638	277.849	141.954		365.708	150.546	177.015		410.812	331.831	108.354		233.806	250.352	67.6888
402.699	153.139	171.38		391.013	303.724	254.647		214.502	279.031	103.372		363.677	195.225	180.853		410.284	180.554	198.673		218.58	294.536	61.6385
401.127	145.64	182.82		390.345	299.37	242.505		222.991	274.373	142.115		357.199	149.949	174.96		405.682	192.182	208.652		243.058	267.819	49.2358
404.612	161.623	166.504		394.842	295.138	262.486		222.548	283.876	127.319		358.559	188.622	200.186		409.662	175.477	212.787		223.166	271.522	63.4108
369.043	146.183	139.953		381.767	312.27	250.708		203.238	250.605	108.722		380.537	182.689	190.295		399.612	155.945	35.3958		231.971	278.596	63.4347
372.903	174.465	140.038		401.972	301.391	240.843		215.839	272.716	80.2064		378.771	151.592	174.549		392.052	153.897	17.2676		229.23	281.816	67.2557
372.5	155.052	188.135		405.583	310.504	239.906		214.225	254.613	108.452		376.178	171.705	188.413		399.625	176.659	58.9205		241.711	245.515	65.9452
398.735	147.158	176.804		399.749	308.605	237.532		222.196	280.955	94.5779		375.384	166.485	202.902		395.744	157.212	48.6138		228.67	246.678	57.4169
341.932	146.66	150.523		384.918	318.616	240.296		186.827	245.055	128.017		384.078	180.902	188.167		401.391	156.692	61.7931		240.697	276.316	49.0799
406.264	152.172	183.758		389.064	292.657	247.515		212.152	268.382	104.352		355.633	150.577	168.745		401.289	156.676	57.27		233.996	286.105	43.2224
413.423	155.279	177.506		387.357	292.909	257.828		218.742	310.294	94.0577		374.711	153.752	176.961		390.905	172.136	26.5576		216.135	294.934	42.4561
359.233	171.058	167.133		384.256	324.812	247.385		204.516	274.056	98.4833		385.762	154.33	169.691		377.61	170.922	43.2978		214.421	309.574	67.1209
359.487	153.781	157.268		408.983	317.117	240.037		194.249	298.898	115.708		367.325	196.166	188.541		386.305	170.979	68.837		242.298	279.635	54.029
385.726	183.45	151.434		386.773	294.646	238.487		213.911	242.546	104.867		383.171	190.892	172.458		391.359	175.061	27.806		221.159	303.414	54.6096
405.911	194.735	151.239		383.496	297.367	258.889		193.402	287.825	86.9566		359.361	165.778	197.192		401.462	182.074	61.9007		242.882	274.91	43.5887
365.242	148.098	151.116		400.203	296.301	236.011		215.527	299.934	86.8653		375.345	153.09	184.87		392.114	159.022	42.9794		234.008	244.648	62.1226
357.427	158.996	162.17		386.598	301.941	263.815		192.001	271.066	104.908		362.127	150.814	171.581		380.087	167.485	59.0657		239.323	266.442	62.0451
378.195	189.418	141.548		405.398	320.483	233.867		192.334	251.337	99.4388		381.157	177.332	181.598		396.801	155.344	68.3824		233.675	268.234	66.1287
412.95	150.666	177.754		383.944	292.096	244.22		188.043	256.142	98.3856		379.075	182.748	174.327		385.573	161.454	56.8974		240.572	271.335	67.5128
404.849	190.727	158.047		402.881	307.062	231.898		216.364	297.394	93.9729		384.301	161.788	172.122		393.579	167.101	52.8508		245.784	281.948	66.3197
363.602	149.359	157.793		377.9	297.088	272.624		214.21	285.832	104.248		384.333	170.635	172.167		388.69	173.77	52.9551		246.403	240.97	49.9302
411.142	161.827	177.478		394.795	294.632	232.682		200.199	264.84	99.2512		362.571	155.174	202.326		394.642	188.142	45.2409		216.066	250.79	58.2839
367.959	168.241	158.365		401.852	334.752	189.731		222.416	250.519	95.2404		358.1	186.687	194.879		375.385	175.65	28.7682		216.34	299.724	66.0252
363.648	154.04	162.476		398.786	332.422	203.081		196.721	291.51	116.394		371.672	183.863	197.327		379.103	172.739	29.2152		381.415	208.468	41.3733
369.324	145.007	158.81		381.322	330.366	163.933		214.216	270.708	95.4079		373.23	162.902	178.858		400.973	155.616	52.3843		383.416	200.598	38.0108
369.181	150.314	151.851		407.311	336.961	163.268		211.226	276.682	95.4502		364.292	195.593	196.84		397.019	166.741	47.2442		379.095	183.215	31.4132
353.676	151.274	152.04		387.979	332.106	175.919		210.351	267.44	109.263		359.653	175.931	202.617		402.618	154.449	41.5263		402.418	165.313	53.5776
379.433	146.665	172.383		410.411	310.633	204.753		193.342	290.473	129.382		363.091	160.738	197.554		412.048	161.77	64.451		384.326	169.588	34.0705
364.964	170.426	162.693		404.773	304.055	214.15		202.977	255.104	81.6054		371.188	155.872	181.903		398.766	169.402	43.0648		378.314	210.887	38.2628
383.678	154.377	189.225		410.433	321.325	190.922		184.774	278.884	117.581		357.793	151.296	188.88		381.813	159.194	67.1972		410.079	162.233	42.8821
407.453	160.297	184.181		408.213	330.704	190.858		221.837	290.621	109.173		371.278	184.667	182.56		410.865	151.103	33.4303		394.715	179.721	34.7756
416.37	159.89	190.127		377.247	327.512	164.54		184.696	256.964	130.092		378.209	185.202	200.144		374.868	173.193	32.0808		388.01	190.475	35.7724
407.87	159.268	173.316		405.95	341.837	190.659		213.102	264.04	81.4864		376.162	165.883	195.531		407.683	156.733	68.2988		391.67	169.818	27.4021
360.111	148.858	168.252		394.669	331.951	205.167		184.702	275.412	130.743		381.521	174.508	177.875		394.818	167.818	43.4583		383.587	184.439	35.0666
388.055	154.357	162.658		405.431	324.349	221.127		206.463	276.921	104.811		358.508	160.645	203.002		381.014	171.709	49.5307		393.789	168.636	32.2344
368.86	156.193	162.664		390.735	332.616	191.859		212.513	304.154	94.7705		377.863	149.885	166.166		406.065	154.369	55.0865		405.253	161.482	55.8369
394.153	155.454	168.179		389.064	326.605	221.141		216.859	292.704	129.844		384.944	183.877	178.475		407.111	152.292	40.712		390.964	175.495	31.7855
411.719	152.66	189.773		404.224	337.875	164.215		193.425	279	104.901		378.249	160.082	172.698		408.218	157.384	61.1378		385.5	175.969	32.1878
395.665	160.25	189.634		394.462	328.325	214.7		193.115	246.502	80.733		384.416	185.381	195.062		376.818	161.322	69.4032		380.576	226.153	39.9033
354.015	177.66	168.214		406.222	314.367	157.94		220.983	285.476	105.346		388.006	165.085	199.372		391.35	177.049	67.9756		393.639	162.026	28.897
383.114	147.435	177.61		392.569	297.781	221.285		216.336	247.912	96.1593		370.439	176.69	183.795		411.585	166.854	69.6759		377.066	197.908	35.0642
403.74	170.349	189.641		411.279	342.211	191.473		209.287	294.018	87.7391		387.806	168.594	188.126		404.326	154.228	47.9603		411.53	165.784	59.298
405.475	152.703	177.878		405.457	341.975	179.685		209.947	258.464	105.238		364.467	179.793	189.691		405.261	153.065	34.4719		387.591	163.802	29.2385
408.241	157.309	168.889		403.106	334.439	158.245		199.214	275.211	80.9087		380.058	151.68	191.706		384.239	163.525	41.4078		379.479	203.039	29.3618
369.476	163.869	163.28		400.44	346.524	192.745		213.919	260.064	88.4953		385.801	159.432	166.605		380.494	176.012	66.4393		405.255	180.152	60.9318
359.131	145.518	144.052		385.781	331.544	165.622		211.251	295.594	81.2893		368.354	150.233	186.469		402.012	165.495	59.0504		380.351	195.792	30.3241
380.418	176.521	143.794		396.03	339.376	170.007		200.633	298.867	118.22		357.002	192.183	193.28		407.266	159.928	50.8092		402.586	163.295	47.9818
375.617	144.614	173.071		409.273	311.119	222.085		207.128	272.379	105.41		369.986	170.732	186.579		399.851	178.628	66.5272		410.693	169.381	50.9665
418.598	164.536	184.623		399.834	308.726	208.744		183.348	257.786	80.7344		376.264	177.519	173.445		376.203	173.205	48.4132		381.963	190.871	37.1389
412.854	193.011	159.726		409.765	327.752	160.87		219.288	289.204	88.6171		382.043	190.732	178.231		410.113	148.829	60.9546		390.588	196.172	194.887
363.948	147.301	163.098		390.643	328.18	160.45		208.186	303.62	89.3324		375.714	187.616	172.974		411.946	155.378	66.8599		386.954	201.662	194.873
378.543	166.771	144.372		398.942	320.85	166.45		196.55	268.957	110.749		362.399	150.598	191.903		409.536	155.581	51.2518		383.875	181.692	189.541
379.736	146.267	159.687		388.393	333.546	160.405		216.737	272.009	109.95		378.412	189.663	186.951		405.434	165.374	69.8203		376.929	203.787	155.416
217.519	262.811	134.446		394.381	319.617	161.449		201.788	291.298	131.46		369.18	192.272	175.355		398.669	159.114	63.9828		387.993	184.304	189.644
246.364	222.795	135.41		404.528	343.342	182.189		184.99	291.406	105.268		371.909	159.041	173.437		386.562	175.18	64.0748		381.329	176.955	181.658
205.238	253.275	153.021		393.999	336.471	165.934		210.098	251.802	110.637		369.548	178.161	188.415		223.237	139.298	180.573		400.815	167.715	195.685
178.549	262.088	158.053		382.72	326.461	171.932		189.136	282.476	119.29		382.473	173.944	192.242		228.121	137.72	189.338		406.836	168.35	195.906
173.248	249.985	182.406		411.041	336.164	194.838		206.406	297.143	119.008		365.116	185.405	194.05		216.272	140.415	163.628		398.912	175.816	190.127
183.025	254.771	172.615		393.217	332.077	209.15		212.649	295.667	130.41		370.104	151.39	178.992		231.722	123.398	182.221		405.737	185.394	182.132
172.347	277.05	152.767		402.204	336.044	170.937		209.244	246.435	105.666		358.642	180.522	196.205		229.469	130.537	172.131		400.474	187.871	181.57
216.72	223.58	158.715		406.921	329.915	183.597		187.226	243.409	120.424		384.241	179.41	173.651		210.294	136.688	214.531		388.595	187.938	195.589
198.201	253.835	165.744		410.513	347.926	195.844		204.661	276.662	81.8383		375.093	179.908	195.456		212.184	138.173	205.709		402.113	183.825	190.571
214.338	253.278	153.537		402.69	325.595	216.839		203.322	242.772	96.291		375.526	160.243	184.15		231.543	130.533	164.098		408.068	217.323	190.257
182.306	268.027	134.49		404.696	313.638	172.013		195.903	246.421	96.0745		210.404	282.135	213.53		234.734	128.237	182.201		402.107	165.039	203.001
177.402	256.264	153.275		400.785	329.485	209.709		188.14	295.385	109.868		229.714	248.98	229.683		209.86	128.527	205.924		397.264	201.089	181.836
181.743	261.593	153.649		391.517	332.609	183.848		222.675	260.711	105.302		204.788	241.473	227.184		209.302	130.14	155.714		379.818	196.952	159.516
189.589	255.573	173.474		404.568	341.412	197.811		215.603	249.771	90.1049		216.986	241.55	227.083		223.87	121.191	183.131		411.182	190.368	202.939
202.413	248.081	166.385		405.554	338.846	184.565		201.339	259.631	82.9926		204.626	237.21	232.497		243.329	138.69	173.024		380.368	206.64	160.551
176.088	263.574	173.785		393.442	333.395	198.486		207.298	271.28	96.1145		211.706	271.786	258.673		215.497	122.653	182.477		388.456	175.442	203.236
227.945	256.233	138.687		407.348	336.13	198.509		203.122	271.711	76.3959		203.678	260.992	229.537		221.98	131.574	181.914		399.767	187.135	195.811
186.322	254.276	138.905		401.427	333.296	184.705		196.633	284.509	101.452		218.545	273.784	258.987		243.139	127.348	205.755		402.279	193.155	182.537
179.42	276.727	145.205		406.105	333.857	210.124		199.216	287.893	95.1376		220.689	235.774	221.507		216.188	132.868	183.069		393.606	234.755	161.045
171.496	255.119	184.057		398.514	314.643	168.006		188.66	254.466	75.8527		217.486	271.652	241.702		242.135	126.279	198.549		410.177	167.872	202.759
184.437	275.583	153.641		396.075	304.198	223.32		216.57	287.402	82.1465		213.876	267.016	232.17		218.567	137.275	215.088		408.97	186.501	191.159
208.236	255.696	158.699		408.941	340.228	173.757		208.225	253.17	101.689		218.179	256.269	227.615		235.73	139.316	157.074		395.349	195.058	191.303
181.548	244.408	135.194		395.66	331.316	174.999		207.211	263.434	75.4735		199.097	266.586	227.538		220.115	128.621	172.595		390.045	180.206	182.814
187.803	257.831	135.13		392.109	337.021	174.064		219.942	267.163	89.2409		203.622	266.293	241.921		236.608	132.603	190.558		387.26	186.089	182.679
221.621	257.968	142.664		396.893	327.719	168.381		199.681	271.285	99.9037		199.102	267.991	242.964		233.833	127.62	207.398		376.936	193.743	161.906
232.662	246.671	139.159		411.805	344.075	154.905		220.226	284.322	76.6539		215.58	237.257	232.817		228.602	130.356	199.519		388.136	203.091	162.379
189.459	263.714	166.826		406.015	312.206	223.617		209.356	276.972	101.217		199.826	253.555	238.515		220.692	133.748	165.264		394.913	169.447	191.94
178.031	252.485	138.691		404.988	329.735	175.074		217.777	290.388	76.4907		205.378	280.299	221.198		235.604	133.76	166.045		395.245	196.364	204.041
190.128	260.06	154.383		410.644	324.859	219.327		217.338	259.76	105.966		210.309	251.211	219.714		213.529	135.482	157.801		406.325	162.67	192.294
217.905	251.488	149.042		385.12	319.217	156.154		193.938	248.775	110.95		215.079	269.53	261.154		219.168	136.848	200.933		387.106	164.421	192.194
179.852	264.542	135.08		388.341	295.095	224.5		206.371	261.764	106.134		224.874	228.191	214.672		235.875	118.714	191.168		383.869	195.441	163.909
195.065	269.585	145.298		401.485	297.467	220.235		185.152	267.869	133.731		219.024	280.445	241.814		242.809	137.114	166.076		403.102	176.683	183.934
190.396	266.857	154.438		411.389	318.306	168.55		223.864	248.373	83.6372		205.072	251.164	237.926		224.893	133.413	200.249		395.045	205.707	163.89
206.6	273.244	142.443		399.357	335.787	201.007		215.543	255.845	101.666		224.37	273.346	237.486		243.008	122.955	216.535		403.797	195.657	192.205
205.064	261.676	138.909		409.194	314.353	214.233		198.224	288.553	82.7488		208.036	264.606	226.461		242.727	134.747	200.706		382.602	175.523	204.667
175.429	250.13	175.155		409.3	354.237	162.986		190.813	245.669	134.503		218.767	232.766	215.434		209.54	138.362	150.098		386.021	163.338	197.651
207.663	251.777	159.827		395.833	317.331	156.617		214.946	297.211	101.376		207.829	273.007	227.955		229.476	140.668	183.091		383.686	172.904	192.645
190.495	267.947	148.904		406.217	326.688	168.782		217.572	306.003	119.525		230.263	265.558	230.875		228.195	141.84	158.17		413.56	184.046	192.558
184.067	265.063	168.068		399.808	326.467	224.453		208.189	295.791	76.7178		210.792	241.057	212.656		230.058	112.017	215.859		407.377	182.321	197.675
174.306	242.5	190.071		404.631	346.315	187.369		192.054	261.462	112.118		199.611	241.6	238.189		235.42	138.426	151.004		405.519	190.389	192.122
176.343	273.528	148.732		410.841	346.664	174.836		221.703	246.947	77.5559		198.026	268.161	213.647		210.464	132.28	150.865		398.722	200.047	197.924
225.694	260.41	135.906		407.085	326.27	212.98		196.218	277.086	89.3934		228.594	277.014	229.517		225.007	129.262	175.467		409.507	217.294	183.607
174.678	236.629	190.959		404.801	316.582	163.162		203.176	256.088	102.254		222.579	258.463	217.808		212.933	128.428	202.091		410.64	180.415	205.527
181.499	249.569	175.689		404.668	350.436	188.473		212.392	277.429	111.964		231.106	256.584	248.7		225.273	124.527	176.031		389.074	206.545	192.479
179.338	270.586	145.864		390.457	299.237	214.415		216.621	263.937	101.651		212.352	234.622	229.493		215.612	130.09	208.226		401.712	183.814	197.594
177.902	246.405	139.089		399.223	291.578	220.647		212.606	267.114	76.4366		212.459	287.01	216.579		215.535	120.662	192.155		396.882	179.323	183.872
193.374	254.471	167.903		214.424	126.117	160.846		190.875	243.672	90.7684		227.809	231.378	243.995		240.553	140.315	151.648		400.851	212.91	167.694
187.982	271.199	154.412		212.004	112.814	155.986		187.035	287.549	112.618		222.267	264.746	237.402		230.226	127.746	177.275		410.245	171.309	192.6
203.735	259.099	159.818		219.928	124.718	155.616		222.84	281.416	133.768		227.976	289.117	249.162		221.475	137.782	160.15		413.79	173.66	198.683
215.602	256.424	142.631		211.567	118.995	162.582		188.269	251.07	112.757		201.941	260.464	221.973		216.166	131.342	152.666		388.898	207.915	185.121
179.777	259.483	176.279		218.69	130.579	155.349		205.519	305.592	83.9446		226.087	235.794	225.739		235.437	132.471	177.495		387.474	164.918	207.126
186.99	258.637	167.788		211.074	122.407	166.236		191.461	285.432	134.635		211.917	262.786	221.826		230.265	115.455	202.009		412.045	164.697	207.282
178.348	253.425	145.274		216.176	119.839	156.947		186.982	253.209	91.1033		210.199	239.743	225.087		236.646	125.465	216.995		399.939	207.742	185.617
182.446	267.76	149.061		410.322	149.364	259.252		195.131	278.971	95.6019		225.786	234.913	218.044		224.743	132.393	159.878		380.809	167.762	208.158
212.756	271.761	136.019		395.862	148.988	258.411		219.846	246.78	102.519		210.715	236.899	216.836		232.599	127.76	202.017		397.981	211.303	173.627
201.628	243.511	168.636		396.661	152.11	246.427		201.867	259.145	106.785		204.817	268.431	214.808		226.534	111.442	194.056		394.358	189.781	199.626
185.781	250.758	176.945		404.842	148.826	236.092		187.914	249.793	102.421		212.372	280.33	222.569		214.254	129.777	194.773		413.363	179.396	186.378
173.871	263.263	155.278		392.821	148.124	239.536		198.572	251.665	102.161		203.659	241.774	212.98		229.352	132.335	194.241		398.254	194.447	185.996
176.672	277.434	149.482		399.244	176.587	236.584		219.11	301.226	91.6765		226.927	241.96	218.204		209.285	120.197	184.837		408.758	175.018	208.612
237.959	247.311	136.815		394.755	180.549	232.704		193.992	302.962	77.259		202.6	271.966	229.848		241.368	139.474	186.182		390.538	167.65	186.48
174.713	253.794	143.254		381.486	155.917	259.184		220.518	275.719	121.011		220.179	243.214	212.978		240.727	128.18	168.419		407.962	170.521	186.581
171.213	251.069	136.096		409.676	164.009	233.241		184.808	300.261	111.559		212.492	270.166	219.885		219.004	136.191	176.818		400.416	192.757	200.63
174.016	231.15	192.14		386.021	161.234	243.653		187.932	242.382	95.5395		222.86	248.123	211.988		232.019	134.065	160.228		381.261	179.625	186.927
177.632	257.988	143.325		405.757	190.289	240.029		211.435	286.894	76.9101		198.612	260.512	234.291		213.01	130.15	168.556		401.962	173.261	200.071
205.046	260.183	143.747		402.924	167.339	243.686		202.786	258.779	90.3053		205.781	235.017	221.903		231.314	115.361	194.998		387.117	181.818	200.435
214.078	259.627	150.031		380.257	167.109	236.874		208.814	263.05	85.1625		214.081	259.558	212.71		214.662	141.412	153.504		405.247	207.027	174.774
200.556	261.933	136.525		408.307	153.108	233.165		210.461	244.426	97.0885		211.655	247.263	222.228		220.563	130.08	202.563		403.255	178.594	193.689
206.11	256.201	146.262		407.709	162.559	240.632		217.393	289.745	134.235		231.052	289.716	219.888		226.015	136.259	217.774		406.716	200.978	175.341
172.821	273.613	136.196		403.095	153.832	233.042		190.084	285.684	106.371		223.394	268.919	217.708		220.124	139.67	185.987		394.615	178.695	201.2
189.945	242.529	177.97		411.798	160.587	244.372		207.378	284.078	90.9066		230.676	229.06	233.319		220.289	126.056	177.817		413.729	181.671	209.098
173.071	248.381	143.821		393.105	155.257	260.209		205.593	257.545	95.891		209.851	230.823	234.473		237.978	137.941	161.673		377.625	184.08	201.08
180.522	255.35	178.128		400.035	148.703	244.697		200.066	242.106	106.633		213.259	228.705	250.699		219.139	124.79	168.099		406.891	178.892	187.534
184.256	249.021	143.507		385.049	159.358	236.77		184.676	273.629	135.977		208.605	252.052	215.364		216.016	131.235	161.708		404.856	175.754	209.507
220.705	250.767	143.678		378.134	160.775	230.91		220.402	255.435	106.551		198.366	258.687	215.262		235.339	139.08	178.997		390.005	194.177	201.16
175.691	267.279	168.813		409.145	147.718	240.465		186.646	301.672	100.977		204.515	281.634	244.819		245.247	141.717	161.639		394.383	183.045	187.832
184.012	259.714	139.745		398.569	170.276	243.837		219.216	261.926	113.268		207.891	223.288	245.906		219.126	137.621	155.086		380.796	167.59	177.877
190.033	277.04	146.993		383.826	158.574	252.217		215.633	255.763	85.9465		205.249	277.224	215.345		229.779	115.344	210.383		378.71	164.841	188.047
188.831	256.421	143.66		392.507	157.729	231.57		205.718	297.142	96.6915		214.784	241.222	238.278		235.548	130.254	196.721		395.255	180.068	194.347
218.638	268.754	139.279		405.953	149.176	261.793		189.309	272.362	113.95		228.652	249.291	213.202		219.024	119.811	187.918		398.801	193.06	194.541
199.871	254.39	155.186		405.211	151.135	253.331		221.489	267.962	106.843		224.16	282.738	251.445		240.926	137.542	180.482		400.478	189.933	187.64
223.509	265.977	136.58		400.079	151.788	240.555		205.784	267.935	85.9067		211.187	257.883	218.275		233.853	137.307	188.456		408.382	174.909	179.038
177.17	270.698	136.645		404.898	147.651	272.486		212.764	244.416	91.7631		207.232	255.444	231.347		221.782	128.932	155.112		395.129	165.68	202.14
195.586	257.631	155.324		379.731	158.905	237.562		194.538	284.681	113.276		215.577	269.808	252.292		230.466	135.51	170.775		392.149	209.676	188.508
189.24	263.01	143.872		410.917	148.122	263.383		220.032	279.388	106.765		226.194	267.69	226.131		239.168	130.99	204.189		401.399	166.236	210.141
183.301	261.841	144.523		398.854	163.689	234.552		212.964	252.911	77.9955		221.975	269.748	233.085		214.013	118.574	188.502		65.2646	212.382	168.945
178.377	271.886	161.123		396.229	154.7	234.956		204.973	268.02	103.069		200.687	277.548	225.878		225.084	130.346	213.84		54.9654	217.218	175.983
173.886	244.723	139.005		396.375	149.417	275.122		219.344	273.204	102.754		225.298	230.162	235.226		404.27	299.19	190.534		52.5939	212.807	198.67
199.68	269.727	146.586		393.727	184.587	253.388		199.464	264.078	78.8932		208.391	228.137	218.51		393.339	313.852	176.247		78.1952	197.986	166.105
186.438	272.523	146.7		392.965	152.715	263.096		214.487	294.22	84.0122		231.071	268.054	239.335		409.129	339.965	158.944		69.5173	195.481	178.773
194.148	270.873	155.206		393.769	150.945	278.738		200.151	271.944	91.5673		211.146	248.83	229.232		380.472	293.849	181.883		75.7436	196.173	186.306
176.566	250.489	179.142		385.941	164.533	235.688		214.012	283.647	78.3543		213.832	253.251	226.078		403.994	314.949	176.49		64.3849	200.163	178.454
183.826	260.232	162.209		398.875	184.629	235.617		215.929	295.876	123.264		198.858	255.632	228.027		385.876	304.957	167.68		54.0029	219.683	189.48
173.517	251.753	147.736		410.686	147.335	235.513		184.41	246.137	107.685		224.748	259.932	233.847		408.588	301.923	176.452		76.5377	228.8	156.66
185.09	263.621	136.734		392.688	151.717	282.145		207.9	281.822	97.6306		199.751	235.175	222.833		406.778	318.822	181.665		72.9313	228.867	176.609
211.549	256.103	146.897		390.36	154.911	249.784		205.925	262.817	91.5309		226.828	249.677	218.742		396.519	296.99	199.262		72.5553	203.166	162.297
179.589	248.857	144.092		397.786	168.062	231.797		209.552	294.663	102.339		217.002	245.472	222.884		385.521	317.286	197.929		68.4625	216.588	186.474
188.42	267.059	136.827		406.134	149.215	250.34		220.338	286.876	135.883		217.811	251.448	218.362		398.95	317.289	159.647		45.9475	217.831	185.819
171.974	268.831	136.044		379.396	292.592	128.69		222.264	293.158	85.362		218.285	270.295	217.627		411.527	321.04	198.69		73.2216	193.899	194.416
173.85	266.717	146.974		397.416	293.171	108.954		212.304	286.912	136.753		223.139	277.746	212.943		388.714	306.704	176.611		49.7025	221.329	185.927
225.684	220.341	151.426		393.422	313.114	137.322		187.222	274.366	107.613		210.65	257.706	238.983		396.675	297.19	192.727		69.2789	208.927	176.541
190.727	220.574	179.883		402.301	294.693	91.2333		215.092	289.91	92.4438		219.051	280.3	218.309		402.985	301.544	198.94		75.259	191.469	166.448
173.283	258.862	150.928		382.887	312.885	133.404		200.881	293.588	92.3727		202.97	284.247	213.166		397.041	320.069	211.119		77.9931	185.361	199.244
180.813	247.823	180.115		404.811	339.45	141.734		204.779	304.576	78.1623		199.97	235.019	231.643		400.879	307.963	198.918		69.595	205.27	166.104
196.126	249.686	170.154		404.47	335.155	116.063		200.001	259.984	97.0164		213.819	233.216	218.147		405.677	322.823	161.07		61.5696	215.384	175.743
243.636	216.157	137.664		408.927	298.266	117.087		189.478	274.071	136.795		209.588	256.55	223.894		410.627	308.563	193.234		58.7841	195.088	204.986
175.24	257.079	179.543		393.827	318.357	129.462		213.33	273.736	102.672		220.747	243.875	218.877		404.493	309.54	160.881		74.5308	188.55	185.839
198.656	267.083	156.143		405.302	302.407	133.939		186.081	264.642	92.8469		203.631	254.471	221.269		378.258	314.007	211.499		52.0543	198.582	204.969
178.923	267.651	162.954		410.67	308.039	109.838		221.463	292.062	97.3782		209.806	272.16	215.459		411.128	325.933	150.468		76.3079	199.582	162.853
183.338	267.299	163.192		403.323	302.068	117.74		203.005	303.898	113.507		215.497	231.79	224.008		406.396	317.513	204.638		72.3396	201.552	204.767
185.663	245.227	180.093		392.202	335.6	149.888		214.922	307.649	97.5737		206.457	233.783	227.259		405.303	305.853	193.46		74.8545	194.901	199.532
219.959	217.162	156.568		400.473	306.569	138.567		197.852	290.661	124.674		230.93	242.876	226.829		382.153	307.117	177.965		77.2736	221.503	176.908
173.972	270.985	163.406		393.102	319.895	116.944		208.422	250.425	78.276		215.256	243.323	215.729		378.189	308.964	199.167		77.7147	198.688	190.472
207.729	266.819	137.499		378.175	309.524	142.443		220.132	250.864	86.5188		218.018	263.411	224.49		379.353	301.698	204.748		68.8307	211.738	162.55
174.112	253.375	170.471		406.332	294.507	117.831		191.008	280.022	113.197		209.447	274.03	223.202		382.298	310.116	204.978		73.2087	223.637	169.525
175.347	258.713	170.845		399.534	298.444	97.6366		219.451	251.223	79.1796		215.226	239.208	220.266		377.955	300.801	193.505		79.2346	219.339	151.298
213.822	247.601	156.52		403.793	332.421	138.565		194.698	269.58	93.6253		217.988	264.162	215.786		405.779	312.908	193.947		63.3662	204.447	209.854
181.69	261.096	170.283		392.601	304.673	134.797		195.227	244.14	102.194		223.95	253.316	213.872		410.206	308.598	184.34		48.0164	215.289	194.378
209.927	249.733	156.464		400.647	304.041	110.84		196.325	300.078	93.3829		206.689	279.906	227.42		401.533	336.168	168.33		65.5833	194.891	182.134
190.07	275.11	151.851		382.263	302.969	135.476		221.369	256.35	97.0441		230.039	282.461	227.004		405.718	293.589	185.24		70.4463	202.351	182.601
178.891	262.212	164.215		406.285	299.452	82.7434		204.486	266.991	79.7688		215.485	283.997	240.98		397.122	308.513	169.594		62.3896	194.837	190.223
213	261.028	138.33		396.734	308.652	143.496		204.559	284.793	86.5169		212.827	277.943	216.601		398.79	314.785	178.484		56.9524	220.515	172.178
198.545	245.219	170.488		397.96	330.14	134.835		211.619	253.782	94.162		229.172	268.05	246.39		376.04	324.449	178.47		78.7617	200.399	208.909
183.945	266.173	152.638		392.433	332.25	118.72		213.953	260.345	93.7561		56.4703	316.439	104.028		402.974	341.901	152.639		54.864	207.811	205.203
182.478	255.034	147.602		388.589	315.753	124.624		222.824	303.778	125.287		68.9697	311.741	126.107		398.646	301.22	185.291		58.2189	204.535	199.337
192.294	253.24	157.051		396.998	319.289	99.9302		186.472	297.68	86.4918		65.4091	324.563	114.427		396.688	333.714	161.352		70.2699	212.917	178.554
219.135	261.46	140.751		381.425	296.403	93.0949		184.819	271.112	102.589		67.1741	308.445	106.271		386.36	330.372	211.354		77.7388	226.423	151.436
184.184	263.101	148.283		388.112	306.891	139.01		187.84	263.654	115.012		52.8283	334.246	81.4251		379.892	294.809	206.061		62.3808	223.278	170.185
182.75	269.249	140.928		391.334	327.876	129.116		214.131	284.15	97.5568		72.3903	336.821	91.0124		406.925	329.135	178.554		50.454	220.629	179.146
174.807	271.379	140.96		394.774	309.064	119.514		204.914	244.656	108.243		68.9904	304.625	130.08		385.793	310.137	170.952		57.4345	225.473	170.037
185.538	259.211	172.115		385.143	309.09	144.991		187.17	250.746	138.349		68.5448	302.504	116.667		377.117	318.624	153.981		55.7561	206.935	182.674
179.334	265.914	147.788		382.513	296.719	126.007		208.613	274.497	87.4279		66.3631	308.265	119.287		397.243	308.021	163.078		55.3837	230.608	170.09
171.016	260.945	144.526		399.911	291.336	101.495		184.811	275.212	86.2032		68.3708	314.15	116.691		399.83	318.56	205.707		63.2719	232.009	166.886
174.59	275.742	144.261		384.955	305.447	111.292		220.036	283.168	86.2287		61.8576	333.564	95.4232		407.85	307.171	178.718		78.4577	184.088	191.178
214.833	258.296	134.489		393.338	298.334	111.492		193.782	257.244	94.7507		72.1924	332.213	103.966		404.449	306.285	186.062		71.9791	232.993	167.076
211.379	264.691	133.874		408.132	310.736	138.678		200.492	286.253	78.4941		46.4869	296.53	112.142		410.634	329.268	185.862		74.3606	211.164	162.977
175.608	264.989	140.871		406.314	304.042	112.012		201.438	272.07	107.22		68.5966	335.715	103.93		402.515	326.8	171.092		61.2179	212.495	182.686
189.948	259.421	164.919		402.834	313.973	125.36		202.531	241.537	87.5524		61.5217	328.277	98.6246		398.575	333.939	154.467		47.8411	227.972	179.191
201.127	254.929	148.313		397.427	302.232	135.976		190.63	250.068	86.2233		67.4939	320.943	106.79		407.056	312.624	200.993		55.9979	225.968	176.46
218.475	256.034	148.312		395.804	321.113	146.073		210.789	295.151	93.673		61.8375	312.246	122.764		380.867	310.334	163.403		69.6116	202.846	191.01
216.919	246.422	152.854		412.049	299.044	84.7883		185.14	245.996	115.628		45.2273	308.515	98.9749		391.425	298.731	213.558		46.5844	223.339	182.62
191.123	253.566	134.237		411.223	331.982	139.013		208.644	254.356	87.329		55.1932	321.932	109.788		401.682	300.454	179.101		72.6685	197.721	173.131
181.156	270.82	157.433		383.005	319.637	138.621		187.467	282.961	126.389		46.6434	309.082	109.163		406.211	319.157	155.163		57.7316	232.081	177.382
18.6873	181.637	234.487		401.771	300.907	87.6192		198.763	292.59	139.865		69.2565	299.253	131.662		393.331	308.454	172.396		60.046	210.766	190.758
52.4788	177.898	240.269		410.534	291.528	127.58		441.397	327.358	238.015		47.4718	313.7	108.067		411.38	315.797	163.945		57.9111	200.244	210.044
80.4173	160.098	216.252		396.618	307.501	112.932		432.103	359.744	238.36		63.8186	336.481	91.4291		404.189	294.629	201.063		73.3833	201.426	167.723
33.6399	169.946	204.657		396.553	292.12	94.3056		426.282	362.168	230.357		67.246	300.431	122.991		411.077	293.645	206.674		53.2136	206.875	195.845
26.1484	202.911	248.625		376.493	307.806	126.569		443.856	357.524	239.281		71.7806	300.089	119.621		383.493	319.193	155.35		77.667	194.317	177.13
31.3062	205.124	248.733		404.139	297.603	122.559		420.712	344.095	240.852		56.3473	313.433	117.394		402.319	295.216	195.37		72.1695	214.126	158.757
35.3428	166.222	221.226		398.37	303.293	127.502		416.895	354.734	234.675		72.6661	313.382	113.677		387.983	315.019	164.051		75.1896	215.953	170.331
76.4378	186.406	240.624		397.892	315.829	147.501		449.926	352.353	236.285		44.8064	313.758	95.9165		380.976	299.707	179.65		61.9946	197.068	182.485
77.9842	150.193	200.178		393.236	300.153	129.956		446.848	347.492	228.155		75.0496	315.449	91.3935		397.457	318.235	173.088		72.116	210.902	167.068
61.2495	176.082	237.335		391.403	339.583	127.171		424.493	348.276	244.888		49.1208	313.927	112.614		399.756	296.154	207.38		57.2182	214.047	172.764
30.7629	169.429	220.107		389.299	296.131	128.055		426.766	341.291	223.454		74.5167	313.231	104.851		393.916	301.362	173.893		57.2247	197.773	191.023
71.888	179.305	243.879		413.373	305.029	139.271		257.852	145.01	48.4063		68.0327	315.244	104.565		398.396	312.589	201.123		62.3422	212.085	186.909
25.6235	174.413	231.325		392.046	300.669	105.479		243.104	135.511	69.7952		52.9733	303.826	102.161		399.275	310.304	173.707		60.511	219.016	170.259
18.103	186.087	219.532		407.998	347.732	130.451		261.602	146.611	60.9583		72.9438	338.75	87.6004		390.296	297.796	202.223		72.5131	234.949	158.196
15.8755	194.162	205.134		385.525	303.266	105.574		244.136	148.974	60.6788		55.2143	321.847	95.7196		406.27	298.949	208.971		77.1996	220.965	167.833
57.1704	180.321	244.248		401.203	308.428	106.349		233.084	139.845	60.6363		73.0999	320.173	87.7415		381.977	316.799	215.371		72.4108	190.991	179.261
9.51139	207.622	225.26		409.662	297.351	123.329		237.603	147.139	60.2171		72.6579	320.472	104.434		409.329	301.542	188.122		63.8264	202.899	191.267
25.4342	186.852	213.423		400.761	318.756	136.486		259.822	138.768	70.0232		72.1715	306.499	130.681		378.531	295.118	197.422		59.1134	224.285	183.125
16.5646	183.937	231.39		392.708	324.19	137.19		258.403	146.595	66.0417		65.492	336.315	95.3871		409.259	299.406	197.118		63.9729	209.418	199.918
15.1483	202.212	219.45		400.573	299.474	132.331		234.574	127.648	68.3385		42.4718	328.214	82.8317		411.076	314.403	187.921		77.5077	219.145	158.384
29.1364	188.302	246.63		406.848	319.016	113.064		260.028	150.94	54.2264		70.1292	338.623	95.6819		385.094	301.169	208.108		76.3487	218.422	163.097
45.0439	190.117	246.986		381.307	298.034	132.473		246.775	152.64	54.5838		62.9353	323.519	102.468		410.277	302.537	202.363		77.9887	205.701	205.9
26.3585	190.56	216.643		411.031	298.562	137.064		230.6	143.199	68.3182		67.081	337.633	87.9088		394.611	305.855	202.224		76.1398	190.975	191.281
34.6011	186.905	244.324		406.323	322.574	140.893		241.851	132.777	56.609		72.3671	327.503	76.6123		388.451	314.073	180.347		66.7003	204.77	170.802
23.0703	182.486	234.659		378.601	304.961	127.963		256.93	152.262	63.975		73.8621	299.425	114.612		392.171	308.317	165.777		52.5639	211.354	187.092
52.0123	165.007	203.097		406.895	305.163	140.885		252.599	130.178	64.9739		50.4169	321.323	83.1048		404.568	340.464	196.941		67.0894	209.084	167.254
30.183	184.874	234.925		405.537	316.817	148.252		234.46	140.585	65.2222		60.2692	306.031	117.789		394.631	320.293	180.507		76.7432	213.645	158.994
73.8791	153.196	222.053		405.173	297.521	128.521		237.822	132.872	65.428		58.8181	299.316	123.158		380.212	295.166	175.007		50.3306	203.739	200.092
22.6493	199.404	244.558		398.703	306.971	90.8298		249.721	150.739	57.9703		60.948	323.076	106.935		381.916	315.893	165.82		76.7484	209.984	167.888
75.9855	164.053	228.514		378.292	322.522	148.409		248.315	148.635	65.4503		63.1444	299.868	109.23		375.903	308.561	208.177		57.1451	202.775	191.332
67.2075	158.833	221.559		377.769	308.282	148.624		428.457	329.399	66.4127		72.6104	321.287	92.276		407.169	296.225	180.725		77.6393	227.464	167.289
74.6162	159.954	219.839		405.064	305.724	128.723		449.45	322.235	52.7346		71.3803	307.595	123.422		398.659	310.607	165.915		78.6659	184.975	174.328
38.4585	175.236	231.625		381	315.667	137.265		446.013	321.366	69.5323		71.4369	314.777	132.15		389.089	296.673	175.311		48.7884	210.762	191.837
77.4361	147.115	211.304		385.002	290.737	107.375		430.47	338.433	54.0947		72.8463	307.294	109.372		391.129	318.386	157.307		62.4291	228.266	171.14
47.8028	156.395	213.55		393.069	304.6	124.601		428.221	342.767	60.9313		59.2638	303.556	113.25		405.496	321.763	216.683		54.41	212.071	177.423
54.0976	157.895	213.667		395.043	315.835	108.294		425.004	323.789	61.0479		50.3264	304.492	112.478		381.048	304.186	166.427		79.6261	221.527	163.589
73.7685	150.295	210.403		408.533	177.629	100.93		412.526	323.704	45.1283		63.4954	312.011	127.178		385.187	315.818	175.132		66.9597	190.844	197.124
19.0972	178.558	219.793		397.196	147.291	78.8752		436.436	337.756	55.0249		66.7358	312.277	120.004		403.386	295.244	216.184		78.7789	196.047	196.478
80.3492	154.514	200.278		409.788	149.602	84.664		423.288	337.991	46.2638		57.621	321.924	114.674		404.008	321.86	175.448		78.7461	203.412	167.533
12.3832	188.736	219.399		388.245	152.924	78.7187		423.051	331.058	67.554		53.3005	325.905	88.4514		384.514	297.675	198.193		53.0758	199.958	200.827
58.1236	157.764	201.452		409.77	172.126	111.972		432.531	344.759	55.816		58.7725	333.372	78.1648		400.798	317.891	166.776		50.6402	233.558	173.637
23.7509	179.832	237.969		408.415	157.49	84.9108		419.484	336.849	68.481		72.0006	334.587	78.1589		70.94	174.036	42.9491		51.0388	213.591	205.676
77.3363	152.976	211.152		396.965	163.005	82.4911		424.167	357.923	36.1254		56.3584	307.834	112.293		46.6946	173.899	67.5629		66.063	225.191	184.003
76.6851	158.279	201.489		403.786	168.395	82.6203		435.44	339.252	68.9431		48.3551	317.664	105.438		65.4263	160.637	57.3714		68.8593	219.382	159.373
62.5956	179.651	244.642		411.256	158.529	79.8972		444.792	322.49	56.6896		69.4526	317.238	96.9486		55.9509	195.26	21.9506		64.1517	199.612	197.005
27.0086	177.156	235.814		406.446	175.481	106.186		430.873	329.012	57.5459		69.1549	319.87	119.851		76.6187	167.456	48.1536		67.6546	208.058	196.839
58.5367	159.364	228.939		401.323	159.108	80.0594		413.754	328.661	48.4094		61.6288	296.522	117.748		56.2772	198.836	29.7205		67.2323	224.641	168.146
39.835	182.862	244.573		411.325	181.897	95.9552		411.859	325.181	39.3968		58.5194	324.603	78.3786		51.09	163.454	69.7957		46.0828	209.201	196.851
80.2704	168.099	231.688		402.569	154.324	80.954		413.272	325.673	69.0175		58.9973	336.105	88.7829		59.5894	185.583	29.798		63.3682	202.77	173.832
15.8725	182.886	222.194		396.853	152.712	80.696		416.815	338.3	41.9238		70.0246	300.918	127.232		67.4225	163.306	67.8306		77.4806	213.251	154.4
59.2273	171.104	232.304		409.601	152.841	90.5774		420.644	325.15	66.1087		66.0891	313.726	112.069		48.2217	173.262	53.3074		53.7838	207.789	191.541
77.4953	155.091	225.453		410.722	175.133	90.1413		429.55	335.896	66.5065		68.7675	324.073	104.09		76.2202	165.307	67.642		54.9091	219.044	183.827
55.4048	188.469	244.615		213.735	247.627	158.171		429.561	378.836	157.036		63.4727	330.781	104.675		77.3159	207.577	32.1574		71.1916	207.961	160.137
58.4835	153.17	213.755		216.788	242.547	156.121		443.733	338.531	210.91		58.4783	321.442	89.1017		64.5759	156.056	69.7673		77.5677	233.125	171.227
54.9213	194.011	244.357		404.228	188.938	202.544		429.184	343.257	211.025		43.3134	313.359	102.388		49.6556	173.934	57.709		80.0356	194.375	168.335
21.9187	178.148	232.168		403.219	163.514	221.474		449.071	330.78	199.65		74.0293	336.716	95.9925		56.7194	177.976	37.1693		72.328	231.495	155.071
68.0047	145.344	201.979		400.248	173.374	221.266		430.573	339.1	206.475		68.9449	325.174	109.25		70.5779	208.192	29.6626		66.4515	193.09	188.294
51.5057	171.97	229.066		397.001	167.861	209.451		419.595	352.127	213.835		63.6849	321.821	117.84		79.8809	166.7	65.3046		65.8447	213.716	177.374
41.8547	172.72	228.541		392.522	157.1	204.867		425.919	344.342	204.26		50.2661	330.389	88.9578		47.0716	167.013	49.4057		78.7766	206.857	184.196
79.4906	163.474	225.666		399.221	149.682	218.058		435.046	346.907	197.85		69.3399	311.622	97.0141		51.3957	181.716	32.1547		71.8359	193.491	188.524
78.8478	161.451	220.143		405.12	183.068	197.62		421.163	322.226	189.911		64.5148	333.569	102.034		44.8955	178.688	40.1346		77.0727	200.719	180.029
45.1112	165.971	225.471		408.63	210.494	198.18		418.95	328.309	190.027		55.4505	312.608	97.0584		57.4959	160.163	65.4425		75.2844	214.293	178.054
53.6687	162.849	219.29		380.656	177.321	185.582		429.369	328.567	211.681		69.0552	318.974	123.9		50.6603	194.264	27.3061		59.4636	202.219	179.723
57.9737	160.812	207.886		381.148	149.773	209.948		414.014	331.597	204.364		60.1922	317.949	114.813		47.2438	208.585	25.3569		68.7773	198.338	187.888
48.3115	192.727	249.193		389.235	154.163	210.796		416.328	326.022	214.307		67.8146	332.654	106.491		75.5113	183.574	37.7485		48.6616	201.834	207.415
32.3518	175.99	228.934		405.069	185.196	215.45		420.188	338.944	207.043		74.6338	336.567	107.176		49.6414	207.47	18.4029		56.4148	202.827	207.014
63.8415	201.686	241.473		397.034	150.543	212.591		436.954	386.928	149.087		50.839	317.203	88.916		63.08	174.491	44.5369		74.9953	208.345	197.086
52.5952	193.276	247.221		379.723	187.59	185.946		442.078	339.773	204.659		51.5393	312.582	104.733		44.3463	168.299	54.1139		74.6625	205.477	188.401
60.2391	166.552	220.425		410.629	147.272	224.661		446.536	379.687	150.33		67.2779	337.165	100.298		78.9032	190.928	34.6626		53.6335	226.138	184.154
51.5266	156.625	217.124		399.014	155.75	212.825		410.622	325.627	211.479		72.158	322.609	120.77		46.2725	174.192	61.8542		64.0666	226.621	178.115
77.1338	170.121	235.378		409.491	156.704	211.107		446.349	351.375	198.281		60.5243	339.66	78.6149		71.1089	175.174	35.1099		47.7686	213.686	188.032
24.2029	199.221	203.517		380.672	149.646	199.415		416.996	334.518	196.403		72.5757	325.931	96.7097		57.651	205.322	25.939		61.2766	219.621	180.068
51.3536	203.539	246.896		393.612	172.493	216.467		438.482	337.863	196.315		47.333	302.302	103.005		63.2354	210.574	30.7026		70.6649	190.765	184.317
79.3419	156.654	211.308		408.854	162.855	222.373		427.229	347.086	196.358		43.4547	305.975	107.404		75.4399	186.303	32.5872		67.2087	229.689	164.519
50.1768	163.394	229.197		404.665	166.706	221.962		444.887	339.141	198.519		50.1447	301.281	115.182		74.2813	191.863	32.4942		63.5006	197.062	207.171
31.319	187.797	201.641		386.282	161.531	204.352		445.689	375.922	191.312		60.6731	330.983	89.0211		73.7807	187.907	28.3936		76.9332	189.032	197.005
75.9191	179.498	241.849		382.797	175.461	191.604		413.668	328.756	200.343		59.6589	318.076	93.0155		60.6144	176.805	41.0403		58.5554	199.68	184.4
62.6635	170.239	238.138		387.648	160.932	224.881		448.09	374.066	153.324		54.7236	307.568	103.091		58.5206	168.726	62.9086		66.785	216.561	171.48
79.2626	144.525	204.582		382.025	163.003	218.716		449.4	339.917	212.151		60.6363	335.574	84.0836		46.151	183.364	31.0923		47.0309	205.208	201.825
22.043	196.166	213.713		410.625	207.811	205.288		450.304	379.565	176.399		61.379	313.386	117.77		67.225	181.582	34.9791		47.5522	233.31	177.82
35.7973	181.724	241.458		392.732	172.056	225.083		440.976	380.28	153.727		65.9884	307.249	127.74		68.8495	207.311	23.6545		67.1596	189.09	191.784
23.8357	193.122	201.391		393.965	157.211	213.712		418.583	346.515	208.773		58.3632	314.423	111.515		58.2538	162.008	55.264		76.4774	223.261	155.674
31.9596	197.643	206.026		396.98	148.555	207.16		448.935	357.438	180.381		53.4534	315.573	106.98		54.8787	166.386	50.9839		45.8452	207.737	207.289
18.4218	184.643	238.49		383.019	157.405	213.436		411.459	341.474	205.368		65.5745	320.801	93.2789		47.4436	200.693	28.4751		59.5061	205.763	174.676
57.0488	155.375	220.394		386.151	161.112	217.047		444.527	375.339	205.022		42.8279	320.344	84.2736		55.8125	162.834	59.5254		57.3188	212.179	202.337
39.6796	166.13	208.408		399.956	172.102	210.794		433.705	383.671	153.431		71.091	326.586	92.7833		62.0366	165.555	51.9139		73.5826	198.669	177.488
53.5719	163.05	232.757		380.17	150.223	218.877		436.238	338.034	201.679		70.4247	333.279	93.2046		53.1091	209.828	23.8808		58.8352	210.206	174.754
33.6728	183.898	229.109		399.473	146.957	225.294		414.476	324.714	193.889		56.7673	324.622	84.4038		49.9596	162.032	59.6708		65.1366	191.696	207.689
52.8543	154.827	203.999		401.693	151.585	205.33		418.459	322.93	209.952		61.329	318.987	102.672		50.8104	179.698	38.5731		54.8448	196.272	207.947
27.2047	195.084	235.831		403.249	155.211	217.333		445.72	380.178	182.927		67.1785	325.889	99.7629		56.5199	213.337	30.8068		52.9276	222.841	174.86
73.9359	145.744	205.967		387.119	154.819	219.506		425.514	347.652	210.353		74.736	320.034	115.872		56.8948	168.672	55.8403		71.8285	215.905	164.371
24.3508	200.014	208.622		380.158	153.75	224.888		442.946	356.656	185.393		66.3998	330.285	111.265		53.4391	173.324	51.6795		72.9948	226.181	155.586
70.7173	202.773	238.626		402.998	148.893	220.247		443.433	344.333	199.417		53.4755	321.974	102.743		76.4265	174.459	38.8666		66.6859	208.095	188.679
74.4004	151.185	217.291		405.594	212.533	193.953		449.556	356.753	193.985		51.3954	320.363	107.587		73.6647	155.824	59.9508		69.8498	209.681	184.936
40.8936	194.744	249.494		404.685	167.063	216.786		445.088	206.997	225.89		71.5799	334.682	99.5588		73.3755	169.996	45.9815		78.3432	210.298	172.33
47.8679	167.267	203.727		407.225	156.463	221.276		419.515	166.969	233.522		70.3562	328.002	102.4		63.8779	184.574	31.4864		71.0975	212.735	171.89
19.0661	189.33	203.958		384.243	154.785	202.015		442.179	192.531	242.267		53.9509	299.737	118.108		48.8558	201.239	20.1047		62.2477	212.529	171.396
48.1605	159.571	206.746		384.396	148.88	225.555		441.402	187.576	229.518		74.0532	330.242	115.131		74.3588	151.498	66.6151		51.7873	210.405	208.478
27.4941	196.29	214.78		407.943	169.911	214.223		438.095	189.527	232.58		74.9172	335.788	102.399		67.8908	156.438	63.7464		71.5162	198.368	197.814
57.608	160.402	211.998		395.616	189.413	194.927		411.912	227.794	233.97		57.6037	302.628	118.643		57.2773	194.266	26.9866		45.9435	217.917	203.164
79.4766	161.03	212.103		402.843	170.611	214.772		442.741	194.461	248.178		71.403	324.252	84.5801		48.8561	164.268	52.5031		75.5176	188.592	208.312
59.8464	162.584	201.396		394.385	149.866	220.972		447.514	191.265	240.875		64.816	310.004	99.8982		54.3894	174.078	55.7326		72.757	219.411	156.16
45.9692	167.957	211.812		399.734	158.694	205.826		444.615	199.967	237.339		70.0963	338.315	84.3774		51.8371	173.709	46.5405		79.9608	195.218	207.852
28.138	172.183	211.75		406.023	167.72	208.574		447.22	206.072	233.504		44.2157	297.554	107.41		69.8371	192.947	29.2722		71.0166	223.194	174.939
36.9095	175.119	201.733		399.378	153.353	223.612		441.419	178.46	249.749		64.1367	304.582	121.449		54.022	200.373	24.3486		50.6673	214.376	180.639
25.8462	185.9	205.957		394.001	174.749	221.059		439.814	196.354	228.737		52.5354	310.475	112.261		44.9222	194.639	20.7281		69.5537	230.148	177.915
48.0312	197.782	244.274		240.263	136.696	134.413		442.794	232.233	229.302		62.9232	317.652	117.977		46.2202	166.852	63.8096		67.0722	234.614	168.908
20.4811	192.195	208.831		234.378	122.229	124.878		447.414	190.293	250.749		61.4341	310.798	103.282		56.1251	186.661	26.4789		63.2891	198.88	188.475
66.5831	178.097	241.859		212.945	117.639	125.582		447.495	193.029	234.616		61.9472	311.451	110.823		79.8406	153.227	69.5414		71.4247	219.991	180.799
78.622	150.063	220.588		218.919	122.494	95.5579		436.486	203.086	235.682		60.8912	308.779	121.051		64.0373	190.672	26.8783		72.2285	223.111	160.941
11.3128	191.128	225.849		240.18	128.073	117.464		438.298	205.492	229.993		55.8771	325.037	105.288		51.5557	187.148	24.7131		71.2286	227.998	164.91
18.4998	194.021	201.715		225.072	113.192	86.3638		435.21	195.86	239.454		65.9044	315.624	124.152		77.1592	156.403	68.8744		74.4096	206.162	175.948
15.7859	197.975	202.341		218.902	118.026	86.2487		447.755	174.297	240.855		67.0397	318.28	111.628		75.6074	160.944	64.2269		77.2246	205.397	161.399
73.4031	168.058	233.079		213.277	112.446	126.038		426.179	196.458	221.067		52.0868	326.526	93.9632		45.4828	187.757	25.0457		67.257	207.04	204.015
29.1629	182.171	214.643		230.444	123.832	104.631		446.273	184.018	236.188		64.6807	302.772	128.204		62.5118	178.566	36.34		44.8452	212.318	204.214
12.6293	205.558	206.264		219.49	131.152	95.9841		444.45	188.978	239.598		57.424	330.296	93.7784		60.7347	158.537	69.0476		78.4341	190.373	171.483
42.6021	188.431	242.048		212.689	107.207	146.336		445.992	179.077	226.815		58.5808	324.736	111.561		52.7353	171.928	66.9067		66.8779	215.532	161.423
75.7686	155.701	208.066		229.637	104.607	105.104		449.848	202.91	221.773		43.2614	297.256	100.987		62.7502	199.573	27.0381		70.9277	187.238	193.919
77.9551	180.24	238.523		214.555	117.977	146.185		432.581	197.983	224.456		49.4383	323.369	97.6107		68.5552	186.668	31.525		51.619	227.965	175.41
61.9838	157.172	220.275		221.838	126.333	96.044		440.551	198.514	245.133		65.2991	299.066	118.656		50.394	196.363	21.8682		76.8904	194.168	171.358
49.2661	180.917	245.279		212.109	114.094	119.779		418.124	203.265	240.359		61.9085	302.494	124.564		51.5886	161.304	64.8506		71.8517	209.684	181.256
10.3177	205.794	214.99		228.363	102.361	87.6421		414.528	161.95	275.585		74.5811	324.982	90.3825		52.9219	173.808	60.8714		76.9578	200.941	172.368
25.0902	201.499	235.857		224.978	127.906	138.839		440.452	193.052	235.98		65.509	339.912	73.5608		68.4701	177.469	39.9417		77.7342	189.642	203.547
50.4534	158.352	223.783		232.115	125.596	119.451		443.257	173.973	222.287		74.339	302.714	133.631		408.165	177.371	82.8376		66.8873	194.746	193.82
76.9413	149.454	214.693		237.816	125.553	126.091		442.55	205.663	238.016		70.691	306.535	118.294		396.425	167.853	94.5488		75.9017	203.51	198.506
25.7105	191.403	209.302		217.874	125.483	87.407		441.907	185.894	222.337		55.9974	331.586	74.6346		398.028	174.69	101.587		73.8606	200.038	193.381
33.1587	186.715	233.353		222.268	115.633	91.5311		420.045	202.107	231.32		54.0675	312.844	109.192		376.768	151.866	86.8014		73.9233	227.347	161.402
64.4879	156.811	206.163		221.564	114.457	79.8093		437.78	201.423	222.314		48.9599	311.514	100.19		410.201	164.079	90.8538		67.6266	203.071	175.845
18.6141	203.767	209.214		228.595	137.301	146.77		440.698	201.573	241.411		74.8904	325.683	124.486		398.392	163.162	81.7789		63.5241	204.689	178.053
43.7385	167.131	219.951		219.028	125.227	126.778		442.795	374.192	118.875		70.0805	304.176	121.621		406.216	168.464	90.9062		64.8134	211.97	193.687
40.9687	169.63	222.906		217.978	119.996	139.214		440.51	331.156	81.2178		53.7578	333.058	85.4957		389.966	161.631	87.9742		74.9715	213.401	185.362
50.3322	187.82	242.407		217.193	118.682	79.662		415.182	340.743	101.299		57.5016	318.506	109.342		404.638	149.273	91.9235		63.4199	209.447	175.646
51.2797	187.702	247.941		216.026	122.895	147.405		425.388	374.513	136.774		46.0502	302.645	111.576		393.571	190.19	111.813		51.0699	216.724	185.413
78.8696	160.922	206.258		229.401	128.245	120.501		445.763	325.734	82.559		67.3313	303.275	111.632		410.808	173.512	104.313		64.8632	221.348	175.908
49.105	162.473	214.594		214.398	118.78	92.0053		423.946	358.548	81.5636		65.3214	334.845	74.3832		393.5	194.156	105.659		72.4698	211.207	189.572
47.3692	157.013	202.486		230.412	130.218	126.733		448.615	377.805	128.325		70.2077	313.563	121.381		401.019	168.45	86.5218		78.2844	184.76	181.205
23.7849	177.419	214.998		240.325	130.089	106.208		434.356	361.101	138.429		60.3036	305.42	107.853		407.052	166.644	95.8943		72.8931	188.449	199.008
58.118	204.269	243.031		242.303	123.054	88.2507		421.434	324.643	81.9964		68.0797	318.724	116.16		399.424	181.984	97.5702		63.5245	217.078	189.201
35.7599	174.974	212.174		212.74	97.2189	93.1022		412.32	348.103	112.495		53.2634	319.633	90.4075		395.96	159.994	102.107		60.3186	207.755	181.151
18.1629	207.104	245.777		214.511	124.241	80.3394		417.652	332.78	101.77		70.3851	321.909	115.99		392.184	185.398	81.802		79.3852	201.412	194.335
20.0103	183.165	214.565		245.329	136.183	120.182		435.37	323.667	82.1608		66.1093	296.332	129.79		386.785	170.992	91.4647		70.2248	229.008	171.861
19.04	188.599	212.155		219.323	125.877	107.251		437.2	379.877	118.659		45.1984	326.777	90.3686		397.694	179.794	87.1527		46.6896	229.514	185.445
32.1509	176.973	206.564		217.508	107.425	93.4213		425.798	337.305	87.1931		56.2201	306.679	119.077		390.91	184.24	87.4366		57.1431	195.897	198.988
31.3556	185.724	208.217		229.182	122.684	89.0762		419.904	336.768	87.698		69.3793	300.691	104.079		390.323	163.435	78.8279		70.5575	187.388	189.285
70.0934	157.033	226.704		225.22	131.827	148.323		436.619	330.394	94.8222		70.0017	327.075	81.2611		396.863	164.42	106.409		56.9306	215.438	194.454
13.6014	197.634	209.16		224.086	120.585	148.889		422.76	333.963	81.5449		49.7768	332.004	75.1168		384.764	167.528	104.571		70.3531	193.653	204.453
72.6362	184.44	242.308		225.268	127.778	129.462		426.214	324.506	87.8107		64.3324	303.613	104.182		403.275	155.286	97.4638		77.9322	232.387	161.958
76.7301	149.433	204.264		245.204	118.94	93.9847		444.767	385.749	112.085		63.4804	308.782	113.666		395.261	194.492	115.347		70.2221	219.888	165.704
56.0174	161.81	223.609		223.855	108.157	82.2948		413.917	373.762	138.527		64.4514	307.046	124.069		404.461	162.724	106.584		66.0084	217.613	181.679
19.9105	203.046	220.56		218.663	128.64	149.187		426.114	345.253	102.54		57.0771	299.168	106.545		404.622	162.151	80.5112		241.721	294.142	159.369
20.2065	193.416	233.605		223.246	121.897	93.439		419.765	383.796	102.346		48.0565	314.932	97.5323		386.928	159.463	105.254		242.41	247.957	157.126
20.6676	182.11	225.653		227.407	114.126	110.065		421.711	360.097	129.28		63.218	327.704	107.967		390.143	168.804	86.8539		232.009	286.569	166.185
44.58	183.732	245.726		217.965	112.472	99.8569		428.016	393.348	107.575		47.9128	308.85	104.246		384.042	171.639	86.7196		234.987	258.55	163.124
69.5493	183.401	245.919		216.307	120.302	131.439		431.515	351.571	102.973		53.0494	327.728	80.7598		404.37	173.579	103.243		238.773	302.925	150.058
23.5102	200.08	224.087		236.212	119.405	112.325		444.484	327.316	95.8065		49.1397	319.463	100.859		380.751	158.714	107.592		234.781	296.071	162.745
70.6321	152.605	212.129		220.884	123.85	141.339		436.529	342.656	107.87		46.8245	332.18	80.8503		378.511	190.38	87.3774		239.571	289.516	160.351
56.8975	162.196	204.562		237.019	128.702	131.807		419.556	362.793	140.338		68.5502	319.778	101.374		395.843	149.917	77.2904		214.117	302.322	162.662
72.5309	145.584	200.043		221.195	135.359	101.172		415.966	329.497	82.4358		66.3541	337.973	80.5531		386.67	172.863	78.8272		236.107	296.609	151.449
64.0362	156.82	212.461		245.401	110.995	90.3587		422.05	338.746	103.197		68.3567	297.024	111.711		399.293	177.403	91.8328		233.332	248.511	160.822
63.8336	151.354	199.427		225.233	120.361	84.6106		438.055	321.842	90.6948		51.5243	298.229	108.902		405.904	177.708	91.9779		221.438	256.497	175.295
45.2374	179.051	239.554		224.598	126.014	102.137		413.087	328.716	96.0959		73.582	331.714	86.2074		396.483	184.675	92.5486		223.343	306.283	168.117
12.3804	191.396	230.505		243.163	131.718	113.558		421.415	344.201	90.4249		61.4797	315.051	106.078		398.201	160.643	93.675		238.672	254.873	157.915
51.9697	154.085	210.152		211.701	114.035	144.831		433.453	370.477	141.398		60.7525	299.282	114.136		380.655	184.959	123.664		226.19	300.935	168.606
65.1242	152.208	218.231		228.789	131.145	144.08		419.649	333.594	90.8186		51.4118	317.912	95.5631		390.911	165.439	94.0168		239.623	291.666	152.731
25.7401	195.084	250.709		226.05	108.014	103.406		414.217	336.325	96.7278		54.594	304.065	111.697		402.434	162.469	100.287		244.544	259.926	158.133
12.8175	197.682	229.936		220.393	110.278	85.9711		419.657	348.547	114.48		62.0893	315.641	98.4434		378.842	168.098	84.4842		221.403	300.159	163.643
36.1567	190.085	248.121		237.672	221.714	62.9771		440.592	362.844	141.804		51.8242	307.629	108.781		395.752	156.654	88.8089		228.239	296.289	160.854
66.0883	184.883	242.743		218.963	248.664	55.634		419.739	341.965	96.7703		58.9446	303.063	101.178		397.967	157.734	77.2622		217.204	299.681	176.661
72.4916	159.176	199.692		242.189	251.6	59.125		449.691	351.162	114.461		71.4085	314.975	125.927		395.426	165.026	87.6557		231.767	301.655	160.272
47.2606	160.88	199.37		217.721	253.334	59.2907		414.711	358.344	121.324		73.4135	321.689	129.778		381.038	164.181	97.3177		218.616	306.281	163.515
68.4272	170.053	236.341		243.421	273.062	34.4906		448.437	367.821	141.748		74.608	318.542	98.6401		385.301	150.28	100.281		227.427	253.263	164.824
31.2412	193.32	248.248		240.692	225.552	34.4195		440.525	367.293	131.252		58.3882	320.216	98.3272		403.711	175.445	98.082		212.393	308.27	160.804
36.789	206.734	246.063		232.632	252.824	16.1829		415.162	373.806	114.129		61.4843	328.414	81.4923		396.908	148.686	95.6287		237.212	300.388	158.164
52.5314	161.923	209.132		232.478	267.556	70.5535		428.605	330.9	83.4746		75.0463	315.422	117.403		411.281	178.613	97.7841		233.431	299.791	146.134
30.2235	189.366	212.404		214.256	277.067	60.9309		425.628	342.553	82.9778		47.6933	325.535	76.3758		394.681	167.504	82.7941		217.239	302.002	157.686
80.3013	155.735	215.283		222.777	244.762	56.9644		412.479	341.884	109.072		73.7109	308.489	104.396		397.907	175.093	81.0637		222.202	297.409	170.595
16.3558	204.258	200.062		229.442	250.358	67.9018		446.556	368.312	121.734		72.2115	321.201	111.626		382.959	163.677	90.323		226.736	300.179	146.702
28.8489	178.894	223.91		221.725	267.123	58.71		412.224	357.105	104.314		71.0334	330.238	108.237		402.914	157.689	85.0623		215.024	255.775	178.604
34.7135	165.474	209.737		243.604	245.903	63.4672		413.322	324.224	97.6066		218.323	239.035	200.067		395.674	181.298	81.3556		242.342	300.508	146.717
29.8574	208.311	243.031		232.146	262.182	16.5897		435.223	347.902	109.464		213.445	245.21	199.917		400.003	165.461	77.7802		220.681	308.193	158.456
12.5322	197.319	234.025		217.985	232.379	65.1914		428.372	347.345	109.664		220.224	267.678	202.505		379.112	157.073	79.7175		226.915	257.21	171.016
35.6057	179.018	236.29		230.857	236.221	69.1245		433.274	380.346	104.582		227.053	271.619	202.796		410.186	180.43	87.9144		215.717	302.973	170.967
67.743	160.108	203.99		242.722	220.277	52.5311		447.256	367.882	115.013		199.623	234.148	195.281		380.959	170.483	77.865		243.772	296.23	153.963
68.5703	153.762	223.922		235.231	251.593	17.7776		446.966	359.363	122.914		205.049	247.701	200.84		382.035	194.67	126.671		221.468	311.508	164.437
36.3407	165.006	215.305		244.503	224.579	46.9494		423.275	364.346	122.806		207.171	237.133	196.498		383.398	152.186	90.9706		223.983	302.998	158.734
67.3454	147.559	210.741		228.184	279.97	72.7047		417.829	337.668	91.6857		214.83	234.171	203.205		383.701	161.726	85.4103		219.023	311.686	154.752
52.4852	158.509	199.985		217.76	225.527	63.735		444.067	374.076	133.769		206.71	242.858	203.082		388.822	152.688	90.6769		217.807	247.599	172.522
52.144	167.953	219.221		219.417	219.657	68.3012		419.187	365.942	134.478		199.048	223.26	201.82		399.439	174.194	109.512		231	304.569	154.081
15.6889	184.097	215.457		226.225	230.681	68.3508		439.919	326.125	99.0678		200.813	230.498	200.853		409.7	165.558	79.8481		216.081	304.297	148.545
45.3408	166.85	234.807		240.421	229.624	54.9253		423.013	333.695	98.3565		207.537	236.85	201.413		375.886	163.224	81.1047		217.145	296.197	172.686
19.5023	192.586	215.751		224.805	236.615	67.8464		417.245	352.992	98.7999		218.512	263.685	202.834		402.102	172.984	92.3002		212.255	294.976	182.831
52.3354	174.243	234.596		224.126	259.316	62.0273		422.254	379.626	98.5384		213.497	265.003	203.244		381.462	168.547	94.6926		244.267	289.668	149.256
42.9614	198.878	246.421		241.184	246.371	55.2346		417.176	351.554	110.082		200.467	224.311	197.626		405.147	153.226	85.7678		212.63	313.344	155.51
81.4247	189.1	239.217		216.815	275.479	65.117		448.437	324.799	99.1492		204.623	228.845	197.33		386.338	154.377	77.8628		246.235	289.313	155.906
77.7271	202.808	236.884		235.894	261.973	61.9923		419.136	339.412	83.3199		198.336	256.953	201.557		410.153	162.48	103.126		215.285	298.9	166.942
15.8024	199.936	240.009		237.643	278.896	39.2512		422.69	327.993	92.0011		205.588	223.308	201.893		392.759	201.135	109.344		424.413	75.8088	114.856
50.7332	160.819	220.634		243.065	256.794	18.6432		424.362	340.896	76.0807		203.061	241.141	198.5		382.81	154.978	85.8889		425.375	323.83	220.328
44.0399	160.851	221.34		244.044	253.308	28.8372		425.777	366.634	115.972		202.011	251.051	198.871		384.46	165.919	81.1443		452.899	323.249	223.899
64.8437	159.896	228.365		235.01	243.921	19.4719		449.616	326.471	92.8173		210.142	258.423	202.546		406.527	167.037	100.983		443.692	325.078	228.98
44.5783	164.829	230.613		211.617	237.435	70.8548		448.931	372.659	116.023		218.361	227.044	201.805		389.98	168.156	100.694		425.111	326.815	229.756
44.7767	162.465	227.411		228.012	242.033	72.2664		443.336	364.094	135.497		206.7	233.668	193.433		388.65	199.181	100.699		428.471	329.776	217.317
47.7823	156.726	218.982		239.137	277.948	53.8576		418.968	348.962	105.323		223.494	234.586	202.68		376.035	162.052	86.3612		422.342	331.813	217.992
25.4777	178.121	205.093		235.943	256.823	42.1467		416.838	351.239	84.102		201.049	239.185	202.681		391.071	148.891	95.2198		441.073	320.857	219.952
26.1137	198.477	247.893		225.498	264.344	70.5016		448.842	357.539	110.838		219.58	227.337	194.249		379.793	149.613	83.0101		422.548	333.244	238.534
58.2773	164.232	216.284		238.813	263.488	19.2916		425.221	387.532	110.004		266.913	141.237	221.783		378.861	153.396	94.6614		241.055	255.76	75.7662
35.7602	196.425	249.478		244.718	280.429	55.703		417.072	361.734	124.243		252.292	140.233	214.516		386.707	182.745	80.2294		227.774	261.763	75.8559
59.544	183.912	243.723		244.508	229.147	47.9177		449.572	373.231	124.797		240.231	141.497	226.343		394.423	173.56	86.3252		211.5	244.411	90.346
24.7687	198.366	218.841		214.14	236.32	62.5896		437.835	376.664	135.095		240.246	140.302	218.119		384.19	185.305	87.6978		222.735	301.469	79.4846
31.501	199.447	251.101		244.143	237.667	50.9627		426.888	326.667	78.7157		239.631	142.545	200.704		389.995	158.082	96.788		218.883	292.159	76.0371
52.8106	166.258	215.717		227.11	219.794	68.4115		415.65	377.81	84.6819		256.258	137.041	182.9		401.762	165.166	95.1548		215.457	243.051	80.3988
27.5532	192.98	205.1		222.857	223.987	72.3975		441.001	356.251	100.486		257.239	138.468	176.847		404.397	156.92	77.8886		220.532	284.693	84.7729
63.2537	147.344	203.35		241.453	257.531	30.1051		432.579	359.389	118.096		264.377	134.821	194.388		376.631	163.659	93.0559		215.795	275.537	79.4028
27.6786	179.182	230.788		225.861	268.14	47.6136		414.711	379.789	106.022		264.102	140.584	184.139		216.945	269.972	119.761		218.254	250.427	76.3253
32.7651	168.853	215.917		225.007	248.832	50.5024		432.157	325.748	86.0114		254.866	142.734	179.656		217.003	285.898	130.605		221.555	271.636	96.2873
62.3671	156.994	224.644		236.166	226.54	35.4811		416.006	345.333	93.266		241.515	141.96	185.85		226.543	272.493	130.972		216.912	266.191	79.8694
72.9657	155.331	202.902		218.173	255.807	51.2007		415.942	334.197	79.5832		267.105	138.364	174.559		210.331	268.308	120.285		219.947	278.003	86.3964
53.1306	182.728	246.231		212.597	242.833	48.6928		442.854	350.164	111.034		248.671	141.87	186.144		212.865	284.735	126.527		231.606	312.379	96.4632
60.151	192.453	243.888		232.439	222.945	65.5885		444.991	368.112	126.963		256.29	139.047	205.632		234.109	236.541	134.163		213.407	283.829	103.505
31.5418	199.455	242.222		211.048	251.825	55.0471		433.527	331.987	80.5139		242.437	140.679	181.326		214.198	280.65	131.193		220.414	290.022	85.9626
80.741	144.514	200.442		241.252	259.679	35.6373		410.81	376.377	110.866		253.117	140.22	198.086		216.375	262.986	120.485		224.48	291.628	103.641
31.3722	177.414	236.615		235.559	260.156	70.1983		429.251	329.198	93.8305		255.659	134.355	198.673		221.733	266.194	130.748		214.757	250.868	80.3459
43.2632	176.201	234.407		232.769	264.933	48.8096		450.161	364.098	136.79		254.283	133.695	192.309		213.743	279.923	137.146		214.839	245.247	97.112
79.704	154.987	203.947		234.841	266.09	64.4		446.422	362.372	118.607		256.56	135.364	187.619		214.104	279.009	123.988		214.281	256.608	86.0362
63.9133	185.903	246.847		239.664	268.73	64.9471		442.157	361.198	127.587		266.215	134.687	187.476		236.879	245.958	137.578		214.424	265.406	92.1393
14.6733	188.258	234.217		245.685	268.751	69.9354		431.29	371.359	119.224		248.922	139.931	169.792		227.205	223.555	134.77		211.773	279.96	74.5307
25.2962	189.513	234.808		229.96	261.618	66.5129		440.318	165.757	75.4968		256.779	141.426	170.155		218.325	266.269	124.269		219.796	291.759	103.94
69.247	149.136	205.781		238.419	239.867	60.2225		444.226	177.459	84.1378		110.962	212.604	39.1039		216.175	282.704	142.679		242.136	247.69	76.4846
58.7705	151.913	205.433		215.854	246.134	43.6263		450.121	202.666	84.2875		93.2656	215.513	31.0742		212.315	267.292	115.785		243.501	280.935	74.207
43.9979	163.332	202.484		244.229	258.857	68.426		450.094	179.167	77.6481		90.7921	208.902	54.5797		221.453	259.831	124.469		223.247	247.671	80.2065
65.1489	168.465	230.985		238.804	262.737	31.0344		436.967	207.386	81.1116		106.768	203.777	58.5682		219.938	273.887	137.001		241.63	287.16	74.9869
27.2208	173.278	219.271		228.076	238.287	48.8663		435.54	223.172	75.556		93.801	211.55	64.4531		232.6	275.256	140.635		217.108	291.618	92.9002
72.4117	151.226	200.399		231.305	251.104	20.1031		449.641	164.001	75.6857		89.9651	210.241	48.9479		219.339	282.868	133.989		229.022	303.693	103.887
39.413	169.108	234.826		243.301	264.951	60.7505		414.54	163.076	91.3574		81.3408	211.249	58.0938		221.008	280.351	138.791		220.247	256.85	76.8233
36.282	169.121	227.726		229.256	273.207	68.8325		447.957	169.192	91.6977		104.262	212.719	63.7893		234.45	226.98	138.878		216.729	311.132	92.6421
10.0681	200.349	219.568		245.527	280.703	62.4458		449.129	174.466	84.762		89.103	215.48	31.8722		220.185	229.581	125.859		215.024	288.311	104.242
41.7981	160.133	205.64		238.227	273.941	60.7977		446.974	172.945	78.6054		97.1184	205.156	62.249		236.055	279.794	143.528		223.842	306.542	74.2237
18.4903	196.695	210.404		218.144	264.083	54.5403		420.896	162.533	92.6376		104.884	194.972	55.3433		227.187	274.663	138.802		219.091	262.511	87.3295
45.2408	204.717	246.477		229.965	219.036	45.9654		444.306	184.025	79.1048		99.3434	197.539	55.6627		217.289	271.84	125.273		222.877	304.236	104.679
30.4044	170.349	228.226		217.213	231.1	44.429		434.827	163.895	76.1178		108.427	208.636	61.5495		210.298	277.728	117.514		211.281	269.177	81.425
34.8341	172.884	234.56		237.232	230.721	62.4798		448.121	165.825	86.3225		112.757	193.669	58.8203		209.875	282.696	140.791		214.685	283.455	81.2415
24.6992	184.038	200.736		235.081	248.544	60.5351		448.041	198.749	79.8214		111.664	212.659	61.7964		213.055	274.616	143.755		214.084	258.409	77.067
21.8744	189.196	200.409		246.074	220.267	57.1647		435.37	210.875	75.9556		96.4259	203.371	55.4044		234.829	262.534	138.863		233.118	271.988	77.1632
11.1148	195.693	227.571		240.227	255.237	61.0823		444.836	215.842	82.7187		91.4686	212.079	44.8272		221.132	275.596	128.727		233.704	279.784	77.4091
55.9841	157.427	224.937		233.346	244.794	52.3982		442.836	222.02	77.0678		108.524	216.826	55.2598		213.227	227.806	118.31		220.363	295.043	97.9663
180.654	263.265	123.155		235.502	268.107	36.9105		438.81	173.354	82.1228		112.36	206.241	49.1197		212.419	273.944	121.873		240.445	300.453	137.619
191.39	234.702	91.6551		238.345	270.361	23.5777		437.726	164.192	86.2141		95.1447	215.092	44.8031		220.953	224.243	133.14		215.547	300.622	93.8435
173.814	233.144	122.976		239.282	256.129	73.136		447.637	166.321	80.3355		106.201	202.263	62.6963		241.438	237.415	141.727		236.414	310.673	138.017
188.163	262.305	116.747		213.099	243.597	58.8691		434.363	168.113	80.3271		90.7128	204.268	52.7919		229.14	264.708	133.131		214.086	250.983	87.8787
203.563	255.331	127.512		232	255.953	70.0032		438.393	214.137	83.2631		99.8343	206.148	52.4979		227.61	282.821	139.305		223.354	312.25	138.149
194.992	247.47	122.88		218.967	280.515	63.8298		442.44	165.901	83.724		100.762	213.092	52.489		223.009	268.584	126.31		223.753	265.926	77.5899
219.426	240.383	83.9937		239.115	252.736	23.369		430.231	162.278	80.3401		81.1197	214.741	61.7037		222.448	278.178	133.292		230.288	265.961	77.4616
179.088	266.012	127.398		221.076	230.789	54.453		442.791	170.711	88.3345		93.2932	199.592	59.4752		230.133	238.811	247.268		218.181	305.286	87.4679
212.004	233.583	78.008		234.218	267.487	56.4846		446.017	208.64	78.3093		84.0378	215.104	45.2565		221.601	269.579	253.471		224.984	284.604	75.1447
176.256	245.359	109.42		239.456	248.326	68.6885		445.682	177.764	89.8198		95.8473	208.154	49.4423		236.72	273.935	257.758		217.904	285.456	98.8093
195.176	260.964	123.128		225.39	220.531	48.762		237.066	140.974	164.38		100.606	215.355	39.7505		238.463	283.645	226.382		210.559	294.105	80.6923
176.776	225.845	91.3726		226.612	273.631	44.1068		241.229	146.343	164.957		95.3003	200.798	65.0374		215.387	228.984	233.072		216.697	251.812	94.1755
187.657	262.426	110.514		237.974	222.465	51.52		233.939	124.334	159.475		92.1627	214.611	49.2743		235.78	282.435	266.282		224.964	311.237	94.0756
240.343	264.75	110.729		218.877	236.904	71.3508		246.628	134.969	155.209		109.715	193.448	55.8296		233.436	241.558	236.094		225.61	310.511	81.8542
194.415	220.636	102.47		244.505	261.135	58.1566		234.036	125.795	153.703		85.6347	209.462	52.876		224.256	240.773	242.425		240.378	265.57	75.2379
198.834	271.405	110.113		227.743	227.342	52.0901		235.85	148.985	171.56		112.382	209.305	53.3905		244.47	264.056	234.531		211.354	274.721	94.9726
190.655	244.705	91.905		241.613	239.924	66.4462		230.015	136.382	172.015		81.2795	211.594	53.1366		244.432	237.907	267.192		220.415	285.486	94.6607
224.238	270.553	101.827		237.363	262.644	24.4595		245.712	145.084	159.721		102.293	192.18	59.7773		217.347	241.507	240.321		228.676	301.088	78.0975
183.36	268.414	127.426		234.812	226.332	56.1151		251.366	147.816	149.544		100.556	212.579	62.1686		229.106	227.25	247.283		228.972	314.72	76.9348
191.294	225.655	101.386		239.034	265.482	54.6808		229.56	142.224	172.425		89.1232	214.361	62.1925		222.198	271.07	231.826		241.091	311.189	75.3635
179.42	230.082	102.399		234.058	259.255	37.8571		247.401	140.042	157.134		86.902	215.093	49.4427		241.22	279.512	258.075		223.821	300.078	108.017
180.855	234.038	123.403		218.38	264.961	67.104		234.282	134.715	166.811		106.107	214.568	52.4293		217.093	282.755	230.479		225.041	308.536	100.132
186.007	272.031	102.469		241.04	248.39	49.2983		231.279	129.352	157.415		84.7438	204.188	50.2375		213.369	260.193	240.881		214.459	311.355	100.846
183.889	215.453	102.35		238.425	248.856	24.0453		254.325	152.292	154.292		94.6529	214.049	34.9436		218.944	253.814	235.618		237.262	299.527	109.733
182.909	232.543	117.529		226.129	261.613	38.4787		244.767	127.122	153.864		100.924	214.911	34.503		237.736	221.601	227.567		225.844	248.161	75.9221
171.744	254.296	85.193		238.23	245.919	44.5153		234.826	142.136	154.516		110.737	203.107	46.3023		218.397	246.279	229.317		227.79	309.957	89.1842
172.171	241.194	116.854		218.841	262.158	38.1081		232.293	137.118	161.538		106.413	216.759	34.4685		225.891	264.351	240.03		220.261	309.678	78.3275
206.358	240.082	78.4467		232.98	233.925	56.2636		231.285	147.316	175.024		91.877	200.172	50.0826		224.482	250.122	229.826		218.993	307.185	100.949
188.804	254.849	122.913		233.363	239.31	33.2377		234.46	135.668	151.675		107.734	190.753	63.1519		209.522	227.566	225.151		220.689	254.306	83.003
179.097	244.094	78.2517		233.43	260.363	52.9556		235.951	133.734	158.096		91.3278	196.841	63.1531		212.48	260.063	235.298		215.811	273.905	89.7962
173.463	245.352	117.092		246.814	274.501	68.0433		247.367	143.737	152.241		90.4009	204.334	46.7685		216.078	282.358	239.567		211.052	290.683	89.7258
199.6	257.384	123.9		228.604	270.076	64.5589		234.942	144.946	168.371		85.6311	205.162	46.772		244.218	257.621	244.44		222.516	286.143	101.347
244.247	256.973	123.591		220.88	259.835	44		248.677	149.614	155.326		111.334	201.037	62.841		237.59	284.824	242.108		224.471	295.088	77.8783
190.863	237.791	110.41		235.737	222.453	46.2562		238.292	140.91	158.885		99.2803	214.925	65.721		245.722	232.744	234.444		220.882	246.65	90.3679
213.986	262.726	123.312		217.301	274.294	53.9325		238.791	133.447	163.439		81.4757	201.356	57.0802		240.703	226.984	241.069		232.063	310.199	112.571
210.127	235.694	84.8439		229.765	226.662	70.2218		235.01	139.717	169.35		104.854	210.336	57.1874		211.301	232.402	240.536		220.089	270.847	83.1851
213.68	266.8	117.48		223.992	241.444	62.4441		432.569	181.186	207.092		84.8282	197.153	60.5719		227.546	259.534	253.713		218.06	278.102	95.7126
190.836	229.855	103.062		232.224	274.572	44.3224		430.444	181.047	199.355		98.3031	191.819	63.1481		233.452	282.676	248.89		211.652	301.488	83.5828
183.982	239.069	103.009		239.915	233.937	38.5493		410.264	181.452	199.219		89.3521	215.2	41.7553		240.842	234.092	238.06		215.48	299.118	102.285
199.408	223.722	78.2949		237.896	259.251	56.2002		416.017	182.713	207.248		108.365	202.716	51.4021		229.546	274.043	227.35		241.582	296.39	120.771
184.323	219.573	92.2591		233.581	276.032	49.8915		412.777	194.838	184.231		104.02	213.876	47.3052		220.912	281.107	227.069		221.432	253.838	90.6266
176.934	225.346	123.775		239.099	243.833	38.4208		444.381	185.363	203.086		102.072	206.58	60.3749		210.859	265.586	224.456		211.324	293.739	103.065
197.805	225.846	72.4483		229.912	229.902	33.4597		420.828	186.876	207.323		98.5826	206.698	57.7199		224.785	223.376	241.35		115.173	325.412	207.249
180.032	271.783	103.144		243.314	227.667	60.5221		442.769	182.157	196.723		101.412	211.13	36.9283		227.477	267.604	225.16		88.9463	320.91	186.206
186.818	215.316	110.668		236.496	272.215	71.6273		413.554	184.247	190.207		105.666	213.394	37.0084		217.072	251.95	240.041		117.35	325.248	170.416
206.03	244.325	85.3055		244.171	238.95	60.9382		429.289	176.598	185.094		95.5812	202.013	47.8643		240.077	222.296	250.01		96.6135	322.634	164.702
237.2	271.901	102.96		242.975	241.437	52.6517		422.411	180.868	184.725		106.224	198.567	58.0866		241.427	275.071	268.508		108.23	327.471	164.772
205.646	259.797	72.8231		231.122	257.683	46.784		446.804	196.186	184.425		98.9761	198.286	60.8512		224.448	222.198	227.127		91.6079	323.176	200.252
219.372	267.215	72.547		232.087	241.408	44.8901		423.188	178.079	199.664		89.9522	207.09	43.5295		232.033	262.066	247.482		117.061	320.618	157.18
199.925	262.352	92.828		227.129	241.637	66.8602		430.009	192.059	204.827		85.3813	214.053	57.7129		243.76	269.717	269.692		103.869	326.514	164.772
221.434	265.919	78.6839		242.001	229.86	40.7011		437.947	174.41	203.775		85.728	207.604	61.1471		243.744	231.567	254.618		107.458	326.84	170.897
247.69	257.044	103.096		236.63	251.726	67.0354		435.356	185.114	197.107		108.774	212.558	48.268		241.059	229.797	225.727		108.994	320.811	177.919
178.228	214.802	92.7826		221.831	276.809	58.5547		432.901	170.906	194.017		86.7518	201.387	64.5526		244.722	247.743	268.746		119.685	324.077	147.544
176.773	219.241	110.943		215.011	255.89	70.4996		413.607	188.602	193.77		102.197	200.972	48.6593		219.206	262.743	236.304		88.5589	324.718	209.409
189.817	233.669	111.29		242.638	221.521	33.508		425.49	179.798	190.794		96.5219	215.615	38.5401		236.009	253.64	228.121		95.9959	325.096	209.602
187.589	222.983	85.8896		230.76	270.781	53.0158		445.173	193.084	190.209		95.7589	213.267	58.4225		210.659	257.431	229.17		93.2056	322.185	183.485
209.947	228.059	86.4154		217.214	226.759	58.2004		411.221	178.766	191.313		100.849	214.139	44.6532		208.947	254.922	226.547		114.511	324.376	158.862
181.23	237.224	111.338		218.708	258.451	65.3652		440.318	188.779	197.103		105.039	208.782	38.7943		245.179	256.768	228.021		104.721	324.488	178.338
193.655	262.231	111.18		219.815	271.806	66.9734		416.415	206.602	207.794		90.8365	197.888	55.3708		229.556	271.004	269.27		118.691	334.133	183.221
172.924	239.173	123.476		227.579	239.26	34.0373		411.4	181.946	180.284		102.837	216.183	58.1474		234.129	263.507	229.988		94.151	327.266	178.234
204.294	266.47	93.2254		241.898	278.97	25.6312		450.528	164.207	204.134		85.3109	203.528	55.229		237.955	247.976	239.142		113.826	329.956	194.578
249.865	248.428	124.548		225.66	265.842	60.562		412.434	195.71	190.822		82.1767	210.722	39.1713		238.492	248.945	268.787		105.307	322.014	171.977
243.979	263.201	118.755		228.393	219.615	52.6173		413.91	210.795	214.229		308.159	373.189	62.6797		245.306	284.717	236.388		108.374	333.009	183.705
238.384	256.165	103.566		237.941	277.752	44.6541		419.982	170.443	185.839		410.992	150.626	32.7552		223.388	264.757	247.742		107.449	324.108	194.876
214.283	267.343	78.6904		220.441	248.438	38.9054		435.538	176.51	201.148		397.035	184.853	66.8945		231.343	222.204	232.887		112.403	322.478	172.889
181.884	224.271	92.7835		244.753	277.998	45.4582		425.448	190.614	188.056		402.076	157.756	61.5329		239.396	257.47	235.212		107.76	322.565	159.656
205.607	238.858	86.0765		217.097	277.377	73.4897		434.346	196.925	181.44		396.278	158.897	58.0011		220.995	223.264	231.853		115.238	328.243	166.507
175.501	269.863	117.608		221.024	254.847	38.5707		450.382	201.007	182.068		396.588	182.087	53.4288		239.823	278.416	249.231		95.29	322.788	173.773
190.495	261.297	124.417		223.754	232.126	61.3616		414.204	169.774	182.656		419.913	152.192	64.1858		238.783	260.418	245.274		117.296	325.449	189.02
174.985	243.062	93.1378		238.877	267.426	41.4783		423.031	176.89	205.858		424.137	175.935	63.805		211.267	249.895	241.371		92.0903	322.694	195.502
175.343	233.421	112.564		217.391	258.677	57.4515		415.99	164.017	186.339		407.614	183.47	64.218		238.961	277.208	238.827		121.786	332.093	166.244
175.662	263.379	125.339		237.561	273.007	40.7778		427.479	175.589	194.836		404.904	154.89	55.2138		219.132	230.439	229.194		107.784	326.319	202.722
212.862	245.02	86.314		224.287	251.954	67.4924		438.981	196.272	205.879		410.33	166.964	64.4103		225.42	258.076	260.618		114.943	328.882	202.663
213.387	225.059	73.1155		228.02	247.108	61.5953		448.931	195.999	197.48		422.248	148.771	62.1416		236.593	273.219	245.61		103.341	327.392	173.975
189.396	239.42	118.377		223.247	246.241	45.3416		420.992	188.985	182.488		401.533	180.645	55.6646		245.358	264.228	239.978		120.806	332.67	173.204
182.154	257.22	111.968		244.431	231.274	65.1107		447.987	166.536	201.564		401.118	151.916	51.233		231.352	254.994	250.769		106.888	327.935	188.772
204.991	234.051	79.2833		244.721	240.658	26.9594		424.078	189.252	214.647		402.132	149.887	60.4702		237.986	276.773	261.618		97.0362	326.483	203.097
197.444	239.474	73.4299		222.197	278.723	69.4768		433.835	198.277	211.332		410.294	154.959	60.046		230.829	279.016	241.167		87.6734	323.497	203.953
196.949	267.631	123.434		230.751	276.912	53.7479		442.682	183.142	208.437		395.588	172.978	51.5032		231.233	247.684	262.657		97.0075	325.001	195.902
203.308	228.567	86.6496		223.205	278.06	41.5654		438.382	184.115	203.901		96.0536	327.169	62.5694		214.946	245.246	247.468		110.41	329.411	174.023
247.631	265.287	111.858		218.024	229.136	70.515		417.837	197.423	206.16		95.3595	304.817	42.4427		227.752	261.574	230.273		118.782	322.108	167.112
172.637	267.368	118.255		69.5397	188.629	214.106		425.748	187.747	204.171		95.4954	321.967	58.6848		216.396	221.567	231.459		98.6191	326.058	184.673
185.415	237.641	93.6194		73.0862	194.821	218.779		440.27	194.762	185.776		91.0006	324.867	52.9377		223.868	267.405	236.377		91.7232	327.88	184.903
227.342	217.731	73.8688		68.0918	185.271	201.918		435.179	188.2	208.804		83.2443	315.74	42.8416		241.483	239.504	235.027		101.876	321.328	174.89
172.969	225.525	118.792		50.1781	169.753	211.174		444.358	174.626	209.39		87.0101	332.347	61.8548		222.31	237.793	232.867		120.914	327.541	166.779
220.567	249.081	86.7791		67.4139	202.656	218.886		418.221	189.248	202.45		96.5975	320.159	49.111		225.486	227.716	228.419		101.865	324.202	196.224
174.387	226.4	111.532		60.4973	207.67	218.321		426.716	182.831	206.804		85.8369	320.602	42.8001		237.85	268.892	270.517		120.098	325.521	151.961
177.219	228.772	118.287		66.1944	188.563	206.705		424.751	199.113	195.641		104.279	327.292	65.5425		229.636	233.844	226.423		114.736	329.683	179.572
177.323	238.336	118.203		76.4479	193.699	206.829		446.807	194.369	208.984		101.086	312.042	46.3833		244.694	243.245	230.747		113.736	329.178	160.854
210.918	264.092	86.6493		52.9746	203.051	223.486		421.397	194.593	209.619		92.8294	300.013	38.5459		243.825	270.542	241.023		101.181	323.318	166.923
210.689	214.913	87.1224		64.732	203.153	210.368		435.096	192.507	202.194		101.844	316.994	49.6984		234.346	255.248	271.799		107.589	323.147	152.383
183.937	230.785	93.9795		45.2362	191.398	218.98		435.856	209.935	186.238		88.1269	326.852	49.7818		244.378	255.16	272.108		114.005	323.258	152.222
209.639	221.777	86.8713		67.6621	212.565	223.71		421.98	198.974	202.248		92.2081	331.018	63.0359		215.785	274.681	240.161		118.424	323.249	161.815
226.586	255.103	93.8172		66.3492	195.595	199.047		430.442	191.484	195.643		90.3944	320.718	46.7762		237.03	276.207	232.759		110.955	325.525	186.051
217.607	235.159	74.9684		57.7801	180.134	214.657		417.546	176.855	187.121		102.483	326.616	59.861		224.258	241.142	248.845		102.945	329.512	190.71
215.055	242.762	79.5805		54.5315	200.614	219.168		443	168.82	202.942		94.5562	312.05	44.7094		233.065	232.029	243.649		116.955	329.168	174.272
212.917	250.571	79.8123		60.3651	190.444	223.857		419.506	187.146	212.903		109.488	321.217	64.0118		212.135	277.93	234.848		102.35	322.233	191.132
224.904	255.167	73.9033		57.2426	194.358	224.004		451.153	212.218	209.45		86.0451	325.927	56.4424		218.323	257.676	228.284		119.5	322.249	197.592
192.594	214.584	104.14		78.0795	210.034	189.615		429.774	193.227	212.922		96.7481	334.666	63.8311		232.906	268.686	227.568		120.249	328.586	161.851
180.93	221.903	104.419		51.2289	160.941	219.213		449.96	171.811	210.099		89.5916	315.807	45.0014		240.274	258.366	226.299		98.5819	325.163	190.821
227.191	262.216	75.1448		62.9652	188.92	195.496		411.575	189.179	202.72		91.1386	323.408	57.0198		237.713	270.854	228.518		91.4733	325.692	191.664
182.526	218.359	112.396		73.7108	195.538	195.277		444.573	204.573	195.858		98.2834	329.134	57.2687		244.061	269.722	228.434		110.938	328.705	190.987
243.694	274.847	74.3739		50.3435	193.711	219.254		421.457	188.487	192.33		97.6026	316.046	51.575		228.053	264.042	263.281		110.071	329.58	197.254
190.618	229.609	79.0619		75.8746	190.476	199.632		426.05	178.882	213.28		105.398	323.535	60.7534		237.459	222.519	233.375		101.147	329.03	180.503
189.945	249.372	87.0154		72.7975	184.11	207.394		423.909	183.516	198.917		85.7873	323.409	47.9556		210.219	273.251	230.262		113.225	332.463	185.527
177.934	253.438	112.518		69.1184	209.162	203.099		244.548	267.283	160.723		81.52	329.223	48.1367		229.604	221.403	239.51		119.076	320.963	152.84
248.236	256.17	119.108		70.2721	191.604	206.913		255.587	269.94	154.972		85.3851	326.585	64.7968		221.615	257.018	232.979		101.553	325.388	205.376
203.755	268.847	87.3524		48.5296	153.072	219.456		231.668	266.74	161.795		83.8499	328.329	60.9666		234.506	266.993	248.652		92.3869	325.481	205.386
213.836	239.696	74.8931		68.6895	194.129	224.826		250.734	275.774	149.656		111.199	318.352	57.8548		245.591	242.153	224.453		88.1998	321.415	180.351
177.372	251.912	79.4954		47.439	194.588	223.997		245.427	275.724	156.106		99.4036	306.471	45.3277		235.425	224.145	239.79		121.643	326.753	181.315
182.22	263.375	118.928		77.3528	202.575	183.91		235.242	263.348	168.338		91.6094	320.952	52.0559		241.18	240.461	252.071		110.438	331.234	168.509
226.514	263.198	79.9969		58.5566	199.017	214.959		239.621	265.726	164.144		84.0728	296.873	41.432		226.689	279.315	231.754		119.261	320.79	205.801
173.844	216.543	94.2893		49.7241	176.615	211.197		248.39	281.728	151.256		109.267	322.572	58.1476		245.802	267.523	250.293		107.607	328.233	181.215
197.496	265.922	112.349		60.9262	184.706	199.874		238.399	265.796	158.81		94.1166	315.906	48.4093		220.274	224.041	243.33		119.324	330.963	198.21
181.736	239.295	125.183		68.9207	179.125	195.811		250.77	265.22	159.527		82.6726	324.538	45.2256		239.768	266.52	239.357		112.786	321.303	206.455
175.657	241.528	124.511		65.7108	193.691	202.954		267.473	270.749	151.665		82.5514	327.044	52.8994		237.681	252.457	246.407		85.8034	324.92	198.317
214.538	231.725	86.8767		78.3426	202.053	203.553		235.403	270.873	164.791		89.8381	325.308	61.9198		215.268	268.596	238.58		99.2026	320.405	163.061
176.444	253.899	124.715		64.6309	205.641	224.952		233.523	260.22	165.454		259.877	277.907	114.428		230.384	241.652	229.036		118.296	324.219	176.262
212.93	237.737	86.723		72.9036	205.127	219.406		235.235	281.521	147.667		151.915	296.334	214.169		238.881	241.292	228.993		100.182	321.875	170.005
221.599	242.694	87.0435		72.5995	210.059	210.999		264.012	266.739	56.3361		153.59	301.63	215.942		214.834	268.098	224.374		98.8255	327.492	199.616
186.502	256.518	94.7075		66.8112	210.707	211.331		257.805	263.317	49.2125		395.522	322.114	65.9871		241.342	228.431	233.712		116.514	332.573	169.229
193.514	243.481	79.9492		67.4368	199.588	214.992		259.619	263.379	19.4442		401.867	304.575	12.3148		238.614	278.782	224.259		113.537	323.697	199.146
211.207	247.166	75.1236		65.9805	163.237	211.318		255.151	260.773	19.3019		396.047	309.082	62.5229		233.993	286.297	255.669		117.688	335.148	175.496
208.589	259.436	80.4034		76.638	211.697	215.347		267.481	304.253	48.703		408.497	298.615	41.7159		243.121	221.506	237.216		86.9348	325.116	186.581
209.405	263.673	74.564		52.5458	192.051	224.189		257.711	259.768	41.5766		412.909	302.919	39.9193		234.006	280.434	272.83		85.7632	325.803	192.43
212.893	272.457	74.7315		76.4421	180.363	199.753		236.317	290.45	62.5029		425.99	304.381	53.5813		235.424	263.453	235.752		110.226	323.616	182.176
219.919	271.101	119.426		58.303	188.409	203.637		252.591	269.223	66.2199		394.767	300.493	11.5341		231.378	256.766	230.776		105.045	321.424	164.374
179.665	219.261	87.5381		70.0501	194.171	212.142		265.598	259.207	61.1431		412.869	314.673	63.2005		240.176	237.357	257.617		117.628	327.529	154.962
203.599	269.233	125.671		58.0157	197.423	219.58		247.242	277.19	49.3481		403.622	304.201	18.217		227.96	246.075	245.607		101.417	327.215	169.616
180.934	266.211	113.01		51.1933	198.88	224.699		266.442	273.038	41.8333		416.073	301.234	45.4318		225.066	240.674	224.336		105.203	330.759	176.725
182.98	239.123	119.445		50.1909	192.57	215.85		244.137	288.305	40.7501		398.764	319.293	23.3058		242.587	223.801	257.959		437.151	328.008	41.7957
188.993	274.861	104.788		75.3468	200.585	224.591		263.491	271.136	53.0573		399.712	319.337	63.1476		241.709	274.218	251.605		427.023	324.307	67.6196
206.721	220.948	74.8364		66.8941	189.847	200.07		261.131	256.832	26.5014		396.956	323.721	26.409		236.405	248.781	224.454		421.017	331.213	46.4661
174.197	253.705	119.097		70.8073	201.914	211.132		261.603	265.983	26.2595		397.292	308.338	55.7732		243.856	226.914	252.087		451.745	323.477	52.0663
186.454	257.198	119.342		75.1407	182.492	186.081		258.485	242.76	66.505		406.968	313.207	56.206		221.161	245.839	235.433		254.729	152.066	56.3433
222.295	260.709	119.357		75.5656	176.752	196.863		238.813	287.788	56.5773		410.662	300.911	52.9385		245.61	249.793	235.767		264.239	153.603	42.3244
217.334	255.215	75.2281		72.0864	188.069	191.497		264.091	265.755	66.4805		403.232	299.296	40.5246		213.498	251.494	233.69		256.633	152.472	44.9401
239.094	255.229	125.26		46.2164	163.39	215.842		242.023	253.842	52.7331		401.14	303.322	27.0991		236.617	243.804	246.846		256.996	137.715	66.1567
190.219	225.617	68.4764		63.7786	184.977	195.672		253.469	258.94	63.3011		395.314	296.54	11.597		228.115	264.972	258.03		256.971	153.789	50.8576
213.758	269.381	87.7354		74.382	207.471	191.286		258.64	242.107	28.9106		416.114	300.992	50.7866		229.125	269.242	252.372		279.247	155.022	99.819
178.898	240.745	95.735		57.7412	146.952	212.017		232.181	286.67	52.8985		405.425	299.879	51.694		227.249	244.784	237.786		282.709	151.773	76.1928
186.303	263.12	104.792		72.0638	176.265	204.028		254.017	275.601	61.1848		420.94	319.044	31.9837		245.194	222.961	227.486		257.5	150.561	89.042
223.68	263.771	68.1999		56.3583	202.925	215.704		261.874	294.121	49.2012		395.339	304.209	15.7633		232.234	225.481	227.059		254.538	153.44	108.372
220.938	223.843	80.8402		75.2381	189.048	186.565		268.542	256.749	68.7747		395.402	335.348	62.9089		216.276	269.348	249.16		286.619	153.4	80.1875
227.156	262.203	125.017		73.6066	203.27	208.095		241.618	270.666	69.0723		395.96	313.759	53.221		239.968	282.331	233.591		256.291	146.466	92.5295
181.553	228.339	113.54		67.6672	205.402	215.872		256.266	280.701	58.5773		420.724	295.591	63.6623		231.37	273.563	246.596		258.27	153.72	112.826
189.047	242.313	113.418		76.4363	170.393	200.985		254.183	283.075	53.0203		401.278	324.066	53.8482		232.219	284.973	231.249		252.655	147.287	82.3462
189.14	250.668	96.5504		47.2051	184.613	224.867		252.24	304.582	60.9273		419.032	302.204	63.843		390.27	154.563	241.985		257.28	145.266	82.7179
225.101	255.704	80.9452		73.3156	184.4	191.716		234.72	288.425	68.5606		398.886	318.254	56.7352		393.603	169.385	250.105		282.298	153.178	96.8739
213.197	250.532	87.9334		70.1323	211.739	215.48		258.526	279.903	30.567		412.777	306.002	48.4317		407.873	170.974	241.58		441.465	345.855	136.682
187.171	224.665	95.8117		66.4856	183.704	212.311		264.5	244.026	67.233		410.931	332.456	56.8948		405.055	185.814	231.168		422.105	347.555	123.083
229.35	272.239	80.8884		48.4591	198.012	220.04		268.092	300.617	68.6861		407.291	305.446	19.2024		390.403	160.82	251.103		430.603	353.584	122.137
208.804	255.299	75.7989		61.8195	187.652	211.767		243.263	275.254	54.7381		399.856	306.458	48.976		384.022	149.223	228.011		431.518	339.434	135.965
224.656	272.151	69.2593		68.5518	196.861	203.585		267.351	290.359	57.2978		406.445	299.819	13.4332		379.175	153.104	231.444		424.428	351.864	112.044
216.953	274.409	75.9459		50.3481	190.055	211.999		260.976	290.776	32.718		406.187	307.201	56.9315		388.375	177.926	250.64		448.021	343.719	120.479
207.769	225.083	81.0472		65.9375	192.378	215.756		241.838	249.847	44.5442		407.189	325.636	46.1773		388.468	152.379	260.166		437.678	339.716	134.629
190.116	252.075	113.805		55.096	185.845	208.125		255.387	308.466	61.3852		404.082	302.957	67.0638		405.445	154.297	239.691		425.95	336.573	121.092
224.119	258.447	125.41		68.3583	204.781	211.626		264.183	302.29	54.7631		411.78	304.914	22.0519		378.992	192.977	246.459		420.104	337.588	104.422
250.3	259.031	113.8		70.3425	192.097	199.912		263.514	259.752	43.6298		409.679	302.167	64.5031		395.631	158.1	228.284		426.267	358.689	123.634
182.773	244.959	120.064		56.886	192.494	208.542		262.553	284.393	43.0428		421.336	317.254	25.0369		404.671	152.478	230.681		451.031	347.436	129.451
188.146	250.554	120.257		45.0673	159.454	220.55		256.967	282.25	34.2008		414.798	303.064	59.984		388.896	185.037	248.732		429.764	343.881	127.016
198.451	246.987	81.1865		79.0476	211.068	199.951		250.66	244.367	64.4946		422.413	302.889	48.3387		393.913	174.263	254.342		450.084	327.818	132.825
183.335	250.854	120.1		71.6241	169.918	208.775		230.444	284.529	49.6455		420.041	299.322	57.509		383.467	155.954	238.53		454.459	345.078	121.157
212.897	220.854	76.1149		51.9444	179.79	216.468		246.973	272.149	62.3664		421.543	324.855	64.277		402.527	156.344	225.584		439.73	330.016	132.762
185.334	264.348	125.28		77.3157	201.965	178.353		268.328	270.707	55.2149		421.929	302.193	54.2159		408.994	174.885	225.67		419.269	345.507	121.013
205.335	271.591	113.792		67.8526	180.15	209.172		233.825	257.484	63.6255		400.4	299.07	12.97		410.175	148.937	243.785		428.251	346.15	90.9657
221.52	223.772	75.8426		79.0325	194.641	192.807		246.972	313.288	57.0238		396.588	304.346	48.7425		410.704	147.968	237.984		434.109	360.855	126.722
203.163	225.532	75.3935		64.8076	182.006	200.669		260.691	298.57	49.3945		395.338	315.982	60.2423		400.163	154.565	256.895		429.873	336.784	132.498
243.811	271.694	69.2157		64.3319	192.344	208.676		265.094	265.473	34.9616		412.936	304.036	18.315		384.042	156.106	231.746		443.759	324.62	135.563
201.445	242.124	81.1803		68.4935	194.887	208.475		240.994	268.931	51.182		412.702	313.46	34.4052		378.695	149.941	261.671		433.857	326.201	112.302
189.22	220.785	96.4525		53.5257	196.268	212.634		267.106	309.916	54.8661		417.235	315.764	30.2334		403.326	156.021	246.669		427.601	347.273	133.073
219.386	234.814	88.2809		76.7425	181.152	192.585		238.71	292.733	34.7405		409.551	298.634	51.4178		383.912	190.216	247.7		450.49	325.723	75.2146
247.52	268.217	105.626		78.3106	179.886	179.283		263.863	281.292	44.6227		415.485	311.947	37.5993		391.022	167.773	257.6		427.539	342.963	121.896
185.525	269.099	105.878		66.8377	187.577	192.718		263.637	244.647	51.7977		403.938	301.612	61.3735		387.141	165.187	251.998		419.29	328.895	116.154
203.913	254.168	81.2996		62.8689	201.431	204.412		267.605	295.049	67.4711		423.915	310.356	58.2763		392.231	149.069	226.475		421.083	356.455	117.826
243.869	260.871	113.999		58.982	164.281	208.994		261.932	255.732	51.6718		419.394	303.997	46.9241		400.484	161.332	235.793		440.527	344.377	129.772
219.989	219.582	69.4676		78.3433	194.027	186.691		261.919	302.068	67.6735		423.844	314.015	39.0158		389.565	159.563	232.444		435.792	346.181	93.901
182.402	255.434	80.9942		66.0204	192.959	193.053		246.477	287.426	35.3195		415.326	296.718	61.6267		398.661	151.732	229.854		451.663	320.942	81.2603
189.15	249.545	125.954		76.3044	208.433	204.195		259.294	269.337	63.0977		397.855	299.295	29.5365		398.229	148.396	236.152		428.372	327.404	108.101
221.286	259.732	69.7428		45.3364	185.695	216.719		256.447	290.375	44.5915		415.802	311.201	44.8402		393.894	161.487	258.91		453.644	325.043	136.01
229.708	273.883	96.5004		77.1966	176.438	187.826		259.192	287.149	50.2869		408.25	305.761	45.9482		391.42	152.928	235.465		433.236	321.075	108.532
182.711	232.935	105.833		74.5842	203.573	200.364		247.06	258.803	36.8005		394.875	309.667	14.1284		407.816	164.728	229.431		425.363	347.059	95.068
195.384	222.73	97.507		61.0387	189.277	216.656		256.336	269.827	58.049		396.734	295.473	20.4206		382.546	154.176	244.772		440.093	335.808	124.327
173.377	258.628	120.855		64.2003	169.803	204.415		266.992	297.338	52.1856		398.24	301.331	21.2987		378.602	151.017	238.614		422.154	349.985	133.423
191.386	273.161	68.619		65.3247	182.023	193.221		251.621	258.608	46.258		419.109	298.159	51.6929		393.036	160.006	238.113		438.002	327.226	126.973
201.488	228.927	80.7704		72.4588	184.11	197.685		259.695	306.355	64.581		414.628	306.295	43.371		390.619	156.496	224.014		422.056	341.016	96.4388
188.328	229.404	96.7582		62.5039	200.86	216.336		268.735	281.961	50.6273		396.806	298.234	47.0401		398.881	166.33	253.637		439.642	322.771	115.873
203.423	266.495	120.935		73.2033	198.852	187.173		257.598	292.523	66.9606		410.458	331.216	47.2402		410.532	176.404	238.77		447.674	350.93	136.096
226.439	244.849	88.8639		69.9979	208.287	208.893		235.792	275.206	54.3232		400.645	312.007	57.6583		407.773	156.755	223.708		447.239	341.564	130.483
183.091	247.532	81.1189		76.347	209.291	208.821		234.679	283.771	54.3115		398.333	305.34	65.515		402.445	175.993	230.117		444.511	339.405	138.828
200.988	276.066	126.005		74.3103	199.096	205.259		236.361	253.833	57.955		419.554	316.362	37.5657		398.18	160.384	252.577		425.443	352.281	127.307
203.563	264.062	114.345		65.216	210.258	216.42		253.63	279.298	46.9713		420.893	309.835	66.0271		379.321	153.649	224.328		444.46	327.891	124.659
205.394	216.883	88.5571		77.1046	201.282	193.122		253.174	290.256	61.3688		400.026	296.929	50.7073		411.175	179.745	230.424		436.513	322.209	122.477
186.693	247.083	106.225		60.9921	198.573	212.438		259.077	298.303	62.9192		410.053	302.662	17.1044		382.74	153.706	253.808		438.544	323.835	109.179
176.716	247.379	120.745		78.3832	197.403	212.513		262.338	295.937	37.7258		426.463	300.322	63.1866		376.874	149.624	245.367		439.016	358.495	116.153
205.246	232.162	88.5409		69.6051	181.044	200.843		259.349	250.918	68.351		404.648	310.543	50.469		381.995	161.5	249.978		442.587	335.51	136.238
190.854	257.834	120.785		54.6509	177.207	221.135		257.926	286.434	37.3965		403.402	300.011	55.5762		401.205	161.538	227.024		428.548	354.203	130.941
236.531	274.643	69.7098		60.2801	169.713	209.197		266.361	306.373	62.2662		395.75	316.46	30.6699		407.832	148.545	224.985		436.303	339.798	127.783
226.001	249.973	89.0518		55.9616	186.318	221.257		248.197	295.534	58.019		407.083	309.016	63.0078		399.399	149.121	225.074		447.905	345.194	136.423
180.771	248.954	125.994		64.4415	196.426	221.35		244.162	311.166	61.9243		401.017	312.626	35.2239		386.782	157.487	256.455		444.708	346.462	124.898
221.699	253.119	70.3128		58.8211	180.037	209.217		237.346	282.313	68.1278		398.646	304.884	23.6266		377.141	183.77	250.856		420.337	341.069	118.936
213.869	265.661	70.3734		66.0707	187.517	216.838		243.936	255.299	62.9885		407.048	306.867	27.6755		383.802	151.355	263.906		449.199	324.103	86.0852
198.958	232.68	76.1903		75.5169	189.014	193.18		241.069	269.621	59.2209		420.558	309.176	45.1963		394.272	156.919	247.305		418.655	331.96	99.5707
213.378	271.446	106.971		70.7627	179.564	187.748		265.688	277.127	61.8787		397.183	315.817	15.2967		393.062	154.368	256.646		443.415	334.04	128.358
188.371	268.781	88.7066		78.4356	204.991	221.097		247.146	256.711	51.412		413.481	316.631	42.3852		44.5324	173.178	82.6894		425.742	361.935	114.613
174.99	233.37	106.385		55.8617	192.673	217.05		262.551	244.638	40.4683		418.481	177.808	89.8097		77.8737	163.175	123.638		438.175	364.243	114.315
224.545	219.94	69.5647		66.0372	159.348	212.716		234.549	268.213	65.7778		404.736	178.53	81.4675		62.0471	178.282	89.6556		420.203	328.485	77.3942
212.196	233.62	89.6224		61.6249	196.58	200.822		268.722	269.115	65.64		420.951	194.899	97.9811		78.3499	151.639	99.1658		434.397	346.245	131.614
202.709	217.997	82.2675		77.2425	200.401	209.175		260.661	262.538	56.3415		407.025	196.738	90.0941		69.9125	176.293	114.128		444.521	325.58	116.522
193.813	218.481	97.9682		71.8397	200.636	196.836		259.842	272.269	68.9056		421.348	188.73	77.1053		67.7645	153.985	98.7283		428.364	327.291	118.592
171.125	235.385	98.5663		69.2473	199.974	200.67		249.516	294.765	65.9091		416.113	189.056	98.1239		79.738	170.484	122.876		433.743	331.137	131.712
227.669	260.338	70.6882		74.9047	149.446	205.893		252.805	296.381	58.8585		413.998	154.243	78.702		74.2309	163.865	98.8177		450.486	330.582	125.526
197.148	219.321	76.622		75.9576	207.986	197.391		250.08	265.683	56.0289		418.631	163.432	84.9735		65.6103	211.425	104.956		453.794	342.777	114.731
218.275	235.163	82.2652		65.9319	162.263	205.359		267.141	254.553	39.3183		406.022	155.758	78.7438		53.3379	174.195	99.1744		443.482	330.157	111.071
189.357	236.473	98.7467		67.8784	149.169	209.901		254.65	293.743	51.8876		413.012	190.375	92.1942		71.8859	173.3	110.584		422.604	357.958	132.178
188.444	250.411	90.5343		74.4798	163.098	209.007		247.587	290.215	59.0643		417.939	185.9	89.2981		63.8242	183.602	116.597		449.292	321.217	131.785
173.188	257.164	90.4502		46.8045	172.861	217.636		244.45	250.563	48.5746		415.911	190.923	79.249		67.4319	156.43	105.197		448.96	330.727	151.07
206.937	274.302	70.5105		65.5946	208.04	221.123		267.741	290.299	40.4028		418.413	159.483	73.0257		72.8418	168.404	89.8784		435.726	349.069	166.063
195.039	248.625	76.7405		47.341	150.083	221.848		236.361	296.741	68.6149		422.784	173.612	90.2129		67.9632	175.971	98.5489		426.626	350.941	177.359
204.422	218.143	70.8498		72.7803	211.522	204.85		251.447	253.431	66.0862		405.177	165.364	77.0021		52.0907	167.484	90.0537		422.582	366.731	150.68
227.086	267.959	82.6016		71.7652	158.919	205.784		263.934	262.534	49.3087		401.56	182.75	78.6316		66.1152	189.142	117.417		440.186	350.499	187.267
240.249	268.002	107.312		65.9328	176.684	197.714		254.935	264.997	59.7684		403.523	171.228	81.2936		54.9198	170.536	83.0523		439.783	332.418	158.314
220.781	239.816	90.4558		69.584	185.793	188.548		230.038	272.001	60.0179		414.894	190.044	85.5475		59.9359	178.145	111.378		448.072	326.933	208
183.545	252.605	115.503		78.6279	183.543	194.201		230.065	278.015	59.4477		406.919	195.44	83.7172		58.2409	171.699	95.6751		427.088	336.951	207.807
218.249	257.194	126.372		61.5979	190.697	201.319		256.298	275.526	51.6369		400.036	198.478	84.9098		76.6071	170.774	105.6		427.171	346.51	187.494
194.767	244.671	90.274		78.589	205.444	188.271		242.984	292.463	66.326		417.231	151.164	83.6415		79.9792	200.482	118.184		419.868	359.728	166.659
219.125	237.363	69.8982		78.5971	193.353	213.056		266.774	249.788	49.0786		406.309	159.038	74.891		76.9654	205.919	115.614		449.218	337.71	207.903
215.711	261.486	76.7819		72.9786	198.209	201.205		256.945	287.926	59.7996		414.559	159.163	83.6155		77.4626	177.569	105.478		430.052	323.517	208.982
192.307	231.311	99.1422		65.2579	206.348	205.355		266.06	287.154	53.4882		398.866	161.583	75.478		60.1923	196.99	99.0426		436.862	357.736	167.518
176.335	220.88	121.888		72.024	205.998	194.294		58.7714	164.336	271.292		408.715	174.865	82.8503		64.4021	188.179	111.22		436.728	347.045	159.828
219.775	260.647	115.195		72.5061	164.612	198.467		87.3616	205.401	259.677		398.606	192.368	74.4671		69.9639	209.319	99.2753		427.991	330.143	196.633
214.139	220.973	83.4058		73.9397	197.826	212.832		76.209	213.674	248.818		425.19	186.242	81.4166		79.281	178.154	128.008		420.072	367.787	159.08
222.206	272.222	76.761		78.0773	204.914	194.018		57.6565	194.219	254.942		421.487	155.51	84.1607		68.727	189.032	105.298		439.661	337.055	189.51
237.503	276.965	99.5277		75.1341	170.931	189.455		82.177	203.48	254.284		417.686	190.696	93.9975		69.542	180.248	128.682		420.181	335.037	180.015
190.829	263.136	107.194		73.2021	211.174	194.302		85.0704	213.171	234.292		414.329	198.016	94.9492		76.7112	202.981	110.915		431.441	339.651	160.117
202.274	220.918	90.2865		61.4483	179.878	197.691		68.2933	171.878	271.773		424.253	168.222	91.6749		61.1897	161.657	99.2076		432.73	348.137	180.67
171.015	251.675	121.761		49.9901	181.442	209.731		56.8441	205.412	225.612		422.883	157.787	88.8634		63.645	166.894	99.2317		440.497	330.529	190.064
172.455	217.075	115.659		73.6613	203.371	188.696		75.9556	206.346	224.74		411.147	192.243	81.1069		48.59	182.902	102.383		426.508	337.44	169.113
188.163	246.865	115.706		71.978	147.517	198.216		53.3641	199.631	260.395		402.417	185.921	75.0756		54.7333	207.912	107.065		422.972	332.812	190.066
218.959	274.486	71.1569		60.0913	184.134	205.87		81.0748	220.911	244.716		420.097	149.935	73.4984		77.9401	194.998	123.254		448.435	332.642	180.559
215.239	255.746	82.3104		60.6015	194.421	205.775		63.6643	219.353	223.811		410.085	191.899	74.9175		68.1211	150.568	83.4624		432.069	343.511	168.786
178.37	268.082	121.551		77.0221	198.934	197.771		67.8002	215.047	245.403		424.724	195.905	104.572		67.0465	205.448	117.97		441.371	353.208	180.046
221.679	263.483	83.1396		55.4837	207.152	222.283		52.4012	205.13	254.657		403.816	193.098	78.1787		75.736	173.809	90.4399		430.044	348.345	153.378
242.46	261.061	99.722		70.1071	204.636	198.566		63.5202	205.554	254.823		413.952	177.479	76.6225		53.8186	168.578	95.4999		449.649	347.359	198.393
222.055	275.738	99.7957		59.7187	204.937	213.433		72.5511	206.398	239.965		396.366	168.934	79.8769		75.9084	169.991	95.446		431.578	329.007	181.323
175.312	263.94	115.464		61.68	165.84	202.424		51.007	200.659	221.192		424.256	167.267	86.4863		79.7571	165.482	108.682		424.751	340.098	160.624
193.089	220.947	90.6241		66.634	176.978	206.095		49.8413	177.561	271.957		414.596	171.928	87.1371		75.307	159.366	83.7512		431.037	320.666	199.619
189.856	244.742	122.383		49.2569	156.423	214.226		63.666	182.67	272.025		423.573	189.289	100.366		51.485	173.01	95.2777		443.07	357.905	152.359
179.713	223.569	115.427		68.2151	168.368	202.257		66.0059	210.787	228.005		405.013	164.962	82.1131		75.263	169.795	111.685		447.761	321.737	210.681
172.484	246.027	121.764		69.1999	190.401	194.985		74.7457	215.818	230.634		265.078	223.109	144.842		58.3863	171.482	111.318		430.29	334.993	199.549
181.561	221.186	99.9082		64.6225	182.816	205.836		62.4214	190.64	261.313		240.333	287.812	144.958		52.1547	192.242	99.6115		423.889	363.709	168.893
175.702	241.994	115.422		76.9682	201.121	217.797		72.3589	224.001	230.814		258.129	289.79	199.464		75.5407	181.38	108.56		441.644	341.217	198.851
182.125	259.907	126.687		45.2001	180.106	214.093		48.2507	199.053	261.146		258.802	231.1	145.271		74.3887	187.06	108.67		435.165	328.33	190.222
243.167	270.479	77.027		68.4569	197.584	194.702		84.5297	183.97	266.672		246.119	282.022	149.148		64.2476	210.944	114.219		446.201	328.16	189.955
177.538	235.579	99.917		77.674	149.76	189.329		67.0083	204.353	249.823		254.323	284.777	155.916		75.4428	174.231	118.65		425.298	363.832	152.572
240.101	260.599	122.268		50.2515	185.441	213.476		58.945	206.148	249.883		266.011	280.854	203.581		55.518	183.946	105.19		431.349	355.955	169.385
222.146	266.731	122.644		53.165	192.399	210.225		52.17	165.231	267.951		248.404	287.437	159.004		59.4828	189.671	108.307		441.737	334.224	161.839
198.56	274.694	122.289		65.3642	198.353	210.072		72.9231	221.83	235.187		260.705	289.252	194.964		53.951	173.69	90.374		440.407	342.595	153.491
193.455	220.54	71.0819		58.5336	174.73	202.305		60.7563	184.48	267.211		420.313	299.919	152.273		45.7008	213.039	99.5366		450.253	341.148	199.412
197.505	215.378	90.9749		55.4021	186.246	213.454		84.7139	216.465	250.266		402.283	319.458	145.838		44.9787	180.424	90.6066		426.373	341.455	153.599
178.784	229.496	122.807		60.8072	208.159	222.774		71.5393	213.586	240.807		409.639	341.248	171.118		73.7977	153.871	103.167		418.914	345.517	199.399
211.974	221.62	71.261		76.8942	184.023	202.712		72.4068	213.01	226.069		393.689	345.542	162.066		71.5333	153.744	91.0951		432.312	333.003	191.329
182.436	241.424	91.4327		70.6092	195.067	189.522		64.3953	213.522	221.59		407.788	311.389	142.282		63.1741	155.003	91.0796		448.37	321.33	181.31
173.717	242.236	100.162		52.6377	195.794	222.811		62.8753	195.178	256.285		416.459	302.177	147.571		52.7598	190.328	111.372		451.864	347.342	161.341
193.451	254.589	122.056		54.6632	177.103	207.103		82.3521	226.48	231.423		398.171	344.234	170.922		79.2594	162.515	114.567		447.79	348.161	190.078
197.774	251.952	122.469		75.0487	205.029	213.426		49.1893	164.209	272.578		396.939	349.998	142.775		78.0128	166.336	129.337		425.103	356.026	181.246
192.225	266.118	116.202		66.6503	171.716	195.491		83.2001	203.015	262.303		398.45	309.487	143.521		67.7174	197.022	106.092		444.073	325.409	181.472
186.441	269.514	116.39		69.7249	150.125	202.505		51.4224	194.579	250.84		395.179	313.79	143.641		75.5807	164.298	114.091		444.283	338.969	199.99
179.717	271.686	116.001		78.3376	187.009	195.882		79.411	226.904	221.592		424.409	313.951	192.262		72.3249	199.09	123.56		421.203	351.564	171.869
185.746	236.452	108.818		78.7238	181.83	182.927		84.1898	217.649	245.603		421.795	303.34	156.73		74.392	172.326	115.043		424.237	363.036	145.875
237.756	256.719	109.478		62.5531	202.961	223.135		82.8309	191.637	268.054		394.681	308.387	149.099		76.0235	195.158	118.492		440.719	353.526	161.014
219.1	262.755	122.724		389.525	182.116	48.3772		81.3531	206.525	236.141		412.955	296.156	144.34		67.8049	159.672	96.3053		444.695	327.518	146.726
194.026	244.745	116.223		395.1	151.718	44.8473		49.4904	181.646	268.474		408.747	299.868	144.101		77.6677	173.371	129.562		454.052	330.338	162.24
194.406	225.399	90.8143		385.829	161.309	40.9177		81.3922	216.173	231.548		419.614	327.444	194.161		56.1239	175.872	102.151		424.224	345.381	171.414
194.489	224.867	83.4811		410.297	146.531	54.5524		55.4711	216.09	225.499		414.372	321.5	193.507		74.6141	154.169	109.317		444.959	350.747	147.477
210.242	253.113	83.433		384.012	170.178	46.2055		58.8146	218.832	225.34		399.507	313.764	149.622		61.8924	179.689	114.737		422.246	339.078	201.484
188.16	230.326	108.991		399.088	147.154	66.9317		86.398	207.122	246.627		407.503	327.41	149.989		67.7612	182.26	114.496		435.663	335.992	154.723
198.766	257.559	84.3907		384.266	163.887	48.6198		53.9426	211.08	228.352		405.538	300.832	175.153		73.5387	166.523	124.005		426.557	338.442	191.707
217.062	227.968	77.579		385.921	152.564	63.0652		56.5001	206.037	235.936		420.684	297.893	145.507		53.1755	181.382	102.457		424.985	328.449	183.562
222.5	232.587	77.8893		388.954	189.472	50.4757		72.2378	179.277	272.483		411.972	338.363	145.253		67.8465	177.829	124.342		454.203	343.773	190.635
191.448	228.682	71.9524		395.252	158.718	45.234		74.7919	178.796	268.375		405.28	295.691	167.816		71.0154	192.208	128.74		436.012	334.276	183.711
185.866	234.665	71.5969		382.573	156.154	58.0512		70.8294	199.515	262.687		402.36	325.006	145.009		76.6979	182.637	123.834		428.054	336.425	183.877
225.636	261.282	91.8948		394.193	147.723	72.1473		68.8489	183.12	269.181		420.35	297.693	168.841		69.6263	171.221	106.201		443.739	333.926	184.071
221.905	264.573	116.78		381.487	147.888	67.5117		80.7635	220.847	227.593		422.19	316.55	167.824		66.3452	178.381	108.837		447.143	343.031	155.093
185.433	240.383	77.6038		385.885	194.346	48.0604		87.2822	206.325	241.953		407.46	353.974	197.264		70.4797	205.856	114.729		452.204	323.972	155.225
182.327	254.972	123.497		380.994	161.332	71.4455		52.3577	209.411	242.262		421.894	337.491	159.074		50.5116	177.976	90.8969		433.614	353.266	146.802
173.058	275.027	117.258		379.29	162.203	36.5562		49.6999	210.974	233.156		394.894	336.633	146.347		52.4595	202.395	103.28		452.375	323.835	163.114
352.724	184.14	29.0176		401.409	155.827	67.6899		60.3348	201.464	257.242		420.913	329.212	169.193		67.3411	201.203	124.55		441.007	343.445	191.108
418.352	148.713	55.3042		390.514	159.965	58.9463		48.7795	169.562	268.971		397.93	297.974	180.211		60.9574	174.488	85.3342		440.79	323.552	203.339
372.373	165.531	16.2169		377.148	159.492	58.3716		83.7712	227.011	225.742		395.325	303.134	182.991		56.6189	163.055	99.5928		444.272	347.828	155.618
382.426	152.709	48.0417		398.229	160.948	55.4116		84.4109	205.973	251.077		400.524	304.331	145.807		79.5169	192.728	129.485		426.945	348.523	148.978
397.283	160.142	25.9842		412.147	171.151	63.2773		62.6538	176.931	273.242		399.414	311.373	159.848		69.6727	162.369	91.3462		433.544	348.551	173.422
375.255	204.836	41.6467		391.372	173.67	47.2957		78.4684	176.022	269.168		400.011	299.974	169.777		48.6052	198.778	106.395		422.806	354.424	163.669
360.952	179.093	8.79222		381.733	155.661	67.9033		59.4593	204.452	242.413		414.633	335.523	151.561		65.415	161.557	103.035		439.784	352.234	155.697
381.766	174.392	23.2186		393.126	161.987	72.0482		61.4085	216.207	232.653		419.156	324.121	199.688		48.2324	174.051	99.7913		445.654	356.521	183.938
350.665	198.358	8.99409		377.57	207.126	43.0481		72.2509	216.705	222.531		394.785	332.912	151.937		46.3621	177.809	96.0646		451.699	337.029	203.948
406.906	152.449	32.7218		384.964	201.513	53.8666		54.7873	202.147	257.24		307.814	428.059	113.282		59.5525	163.846	103.227		424.017	321.603	205.424
417.993	150.856	35.3049		382.264	161.32	64.0662		78.0706	222.844	232.545		302.84	390.195	72.4841		68.1932	182.246	123.961		438.185	354.058	174.302
354.528	165.261	20.2152		409.995	177.351	64.2794		72.5613	207.824	228.62		300.1	412.293	83.4703		51.812	179.194	96.4413		429.409	342.852	175.518
368.505	173.624	31.0537		377.074	148.034	64.7275		55.6019	195.042	250.877		304.431	413.049	82.3626		57.4691	198.903	112.727		434.127	344.172	156.144
372.43	144.169	16.3873		379.643	191.318	46.0773		51.3159	201.942	247.338		307.451	415.918	89.2331		75.3204	166.878	84.5199		437.223	340.439	165.033
410.984	158.535	32.6393		410.195	159.738	64.7515		48.0011	209.728	228.956		305.234	431.016	119.618		54.5896	179.116	84.9714		434.084	341.804	149.856
385.732	149.698	16.4727		401.292	159.152	49.4389		47.8744	206.336	226.227		303.053	416.152	95.59		68.4966	199.786	119.137		419.76	339.895	185.715
413.758	163.914	32.9478		380.674	208.83	56.4755		77.6185	201.757	257.425		309.014	427.561	124.565		73.7402	165.878	108.804		436.93	349.969	150.29
406.417	157.795	34.8867		388.273	163.29	64.4328		67.8384	177.694	273.885		305.616	419.948	96.8409		78.079	151.889	85.0485		434.936	322.032	206.019
413.335	161.744	55.7439		389.629	167.048	43.2819		55.6065	210.538	247.574		303.857	421.74	100.775		72.0897	161.947	106.292		447.323	336.424	192.621
346.919	159.823	18.3616		379.047	171.764	45.9029		63.5077	216.893	237.209		303.059	415.691	100.502		63.3809	155.524	96.3921		419.97	329.423	193.768
396.869	160.17	47.8407		404.241	158.079	60.2302		80.0652	210.82	225.991		306.858	416.168	103.063		64.2221	213.955	100.594		425.398	363.951	185.491
381.339	206.42	23.5191		381.303	178.557	45.9194		77.4657	208.51	251.101		302.207	424.38	107.574		71.305	173.738	125.445		435.016	333.987	205.702
344.7	192.887	31.5375		397.854	164.504	73.0386		80.8636	215.602	246.759		294.998	419.843	107.601		69.6186	183.636	108.92		440.703	337.64	206.607
376.849	147.755	56.2511		406.165	169.243	68.2253		76.2732	218.395	236.052		304.809	141.582	29.2769		77.182	174.889	124.66		419.377	347.272	176.037
344.969	167.186	36.015		393.674	166.223	49.7463		57.4492	210.807	232.733		277.979	136.387	55.9305		80.0045	177.297	119.609		450.381	332.932	157.126
355.836	179.547	10.2108		397.512	159.597	69.3274		72.9633	171.867	269.663		418.006	300.205	130.823		64.9547	172.941	92.1044		430.682	344.897	193.608
380.291	203.864	16.9714		388.45	169.038	50.012		49.6197	187.622	257.45		421.852	315.415	119.408		73.8891	178.19	124.5		440.31	330.308	177.487
353.324	206.297	17.1047		381.525	184.535	47.5337		76.2035	218.441	246.968		410.617	309.568	124.983		55.9201	185.127	111.877		420.42	355.829	185.425
358.729	180.92	32.9553		392.012	162.793	44.0751		69.6014	218.1	227.895		426.615	304.19	80.149		48.8979	173.14	91.6201		440.064	337.425	177.517
365.001	176.606	36.0881		395.544	155.849	51.5554		54.3794	200.615	242.655		419.609	343.543	125.286		63.0593	157.527	100.641		421.291	341.268	165.691
358.197	165.959	10.6488		407.33	178.528	69.451		54.4828	165.887	274.602		394.137	354.443	109.531		59.7814	176.768	106.818		442.707	332.792	151.214
417.281	157.103	56.0045		384.933	169.211	39.6429		51.8746	197.062	247.544		404.585	329	125.237		64.5756	181.985	119.947		448.401	328.426	166.737
374.145	200.765	30.9373		381.79	203.133	47.9008		66.2507	222.539	222.299		416.365	327.648	119.607		78.2315	192.138	109.699		432.132	356.106	150.292
391.275	182.77	32.6012		385.755	158.756	69.3119		52.9466	210.347	237.218		407.629	335.922	120.221		60.8976	184.954	106.336		113.35	217.226	133.852
379.595	144.843	43.4393		384.561	148.298	56.7479		75.623	221.554	227.825		403.924	348.053	125.678		55.2512	179.27	91.8763		104.541	206.869	138.469
351.901	144.327	48.6208		386.124	175.891	44.1053		69.0858	191.297	263.211		396.327	327.195	100.028		53.4586	195.127	109.721		99.5338	207.695	137.316
374.754	195.617	38.1828		404.846	148.337	70.3462		58.9887	212.256	242.633		402.038	337.614	80.9746		64.8084	172.37	99.9632		114.202	234.21	135.429
391.873	145.533	20.1408		389.71	164.653	54.4163		68.7268	219.755	237.532		398.114	330.839	120.159		70.5513	185.71	96.7183		115.745	205.998	135.982
381.489	144.957	16.9208		390.692	157.612	51.8649		50.4062	206.459	233.224		410.226	317.795	126.585		48.4273	188.342	106.69		113.737	212.591	135.693
342.21	155.141	10.8861		408.922	150.205	61.9032		50.2002	168.502	274.592		414.099	346.572	126.42		49.727	168.883	85.8705		118.611	194.521	138.703
369.038	199.767	37.8442		398.417	169.264	52.3031		74.4971	208.636	233.426		411.949	320.112	80.961		46.913	193.44	106.173		107.363	205.116	139.599
374.607	165.034	10.8171		406.593	165.656	61.7886		70.4336	211.455	222.32		424.041	324.301	81.009		60.369	184.84	115.38		119.544	200.404	137.695
408.211	183.709	35.4103		392.101	150.551	54.9007		52.2894	191.273	258.327		413.775	334.182	120.348		48.7371	187.198	100.619		107.433	227.418	136.297
358.661	186.275	35.3095		386.167	154.655	52.2389		57.2994	212.806	222.639		425.44	298.606	126.596		60.5825	156.988	76.4956		119.802	201.541	131.61
367.476	187.44	35.3766		232.587	282.568	84.4566		48.3497	206.128	243.425		413.103	301.854	126.217		59.0351	169.758	103.634		119.906	215.558	138.051
372.668	145.862	31.0777		233.355	260.723	128.828		77.8393	217.743	222.68		411.806	314.497	132.358		70.2571	195.778	115.561		111.643	202.971	136.294
402.633	186.703	35.1138		212.883	253.905	148.423		76.6684	216.078	226.465		401.85	334.715	111.468		80.1874	181.402	130.347		106.828	198.003	137.79
397.102	157.891	20.9535		218.129	281.577	135.006		69.6102	215.373	233.126		412.721	346.353	88.6343		76.0575	196.216	130.801		118.271	226.967	132.702
401.859	166.403	25.2135		213.655	278.691	79.2922		81.5221	203.236	257.41		394.325	327.457	126.439		68.5888	166.933	96.702		104.37	233.375	132.518
363.337	187.548	28.5547		213.878	249.134	149.02		80.9717	182.402	269.589		424.286	299.802	90.1542		69.4635	168.273	85.6287		104.286	202.338	138.058
386.502	207.713	37.1547		230.66	269.205	106.724		80.2164	194.02	263.498		423.516	313.622	101.943		44.9286	208.957	92.2421		119.12	231.513	134.297
366.052	158.804	23.701		235.456	265.158	123.556		54.5519	207.898	251.831		411.696	313.133	81.5453		47.1584	177.947	76.8362		108.608	213.444	135.849
372.013	187.445	17.5757		214.274	279.119	107.03		71.2435	208.483	247.788		400.491	337.64	102.036		74.2571	158.123	106.683		116.783	225.378	138.485
409.805	166.141	56.6181		245.118	273.253	98.9964		49.5011	198.977	238.348		405.117	317.431	132.98		79.3766	165.912	77.9128		102.909	212.475	133.189
361.29	177.083	25.8636		223.907	264.878	133.104		71.4856	223.663	226.308		417.573	320.1	133.129		50.7168	212.467	103.545		107.852	190.795	136.816
349.163	162.616	11.0321		244.772	283.117	108.857		57.8032	179.653	274.853		415.811	308.319	126.747		62.1545	194.915	112.937		101.59	218.525	134.659
388.969	204.054	40.5943		231.962	282.523	90.1958		63.0631	209.816	238.138		417.857	307.648	120.714		57.7195	160.155	86.1352		108.545	201.016	136.474
363.687	182.352	25.7872		228.891	260.958	133.075		60.8509	199.317	252.727		414.726	320.982	102.135		76.2182	163.744	119.691		108.009	218.001	133.183
365.843	168.118	10.9951		211.114	266.083	117.57		86.5767	192.354	264.054		406.251	320.335	126.958		55.1497	177.907	106.751		118.391	220.123	133.439
406.006	161.272	30.2851		239.577	273.849	108.646		78.915	210.453	243.714		402.786	322.998	121.028		73.0947	214.005	96.2821		113.081	223.899	133.434
372.548	171.257	11.0696		214.371	277.604	94.9708		86.7487	211.026	243.206		395.34	326.312	133.812		58.9224	204.649	112.442		110.863	194.083	138.285
360.754	186.851	20.4369		210.928	272.706	99.572		55.3248	215.084	233.859		418.262	313.396	133.838		73.8743	180.281	119.944		110.788	209.61	136.781
345.025	164.791	31.1723		235.242	277.218	100.107		73.3648	211.604	252.354		422.612	318.048	112.925		76.4907	150.756	78.5042		100.438	212.217	138.049
344.725	201.906	11.3772		221.97	260.248	140.317		75.7277	183.433	270.097		400.688	332.36	76.6176		78.5196	189.838	125.419		105.679	211.078	138.503
371.382	152.851	33.7621		240.458	281.638	94.7191		57.3055	199.837	248.387		412.8	341.4	121.218		71.0686	156.335	78.2567		102.671	224.876	135.246
361.547	146.298	43.6314		222.818	260.423	130.951		64.0585	166.812	270.726		395.588	326.884	77.2255		76.937	185.719	131.67		106.897	220.444	138.14
385.491	203.275	20.6015		213.461	259.938	114.123		49.4318	201.892	230.461		398.934	340.486	91.9075		55.9962	161.166	78.203		112.72	230.712	133.423
391.934	151.366	56.9872		238.009	255.006	133.977		86.2576	221.267	232.994		425.757	314.105	127.418		60.0072	184.421	92.6735		114.173	229.792	138.763
367.545	188.04	23.3146		237.007	257.547	140.963		54.4137	201.859	229.242		414.931	316.723	91.5226		66.5326	199.449	100.753		120.003	207.998	135.459
411.609	149.142	28.6461		229.462	263.586	138.386		55.6103	170.356	270.38		401.925	330.09	102.976		50.223	171.308	78.17		444.821	168.592	85.203
375.031	157.731	11.4194		227.288	250.535	145.435		48.0376	196.646	234.197		417.173	299.641	77.3083		65.1721	174.495	104.094		441.045	175.254	80.784
389.633	172.865	30.9452		220.712	274.208	104.848		81.9127	207.728	229.261		406.575	322.344	82.2327		63.6224	193.522	106.765		450.929	166.924	86.0013
344.339	150.545	36.1508		230.174	267.937	131.345		85.1599	214.601	226.845		424.601	319.382	134.177		71.6929	149.271	78.24		422.666	167.106	81.2682
388.782	146.83	40.4602		238.509	248.685	139.142		72.9753	225.899	222.769		409.634	328.749	121.578		71.5395	204.52	107.093		432.901	173.049	74.9785
363.946	162.696	18.0088		227.194	275.582	105.065		55.5119	178.117	270.621		408.638	316.139	122.276		79.7541	187.724	103.941		449.96	173.377	93.8864
414.641	153.684	28.4435		236.757	271.488	119.512		80.441	210.86	248.631		418.541	311.977	92.8898		65.5956	188.022	97.3901		441.555	180.553	85.4506
394.808	159.533	56.8731		230.622	249.074	138.903		71.9807	190.877	270.137		414.299	302.279	135.153		63.1586	172.36	109.992		428.12	174.792	80.7994
406.301	147.824	26.3981		217.091	262.32	132.123		78.8289	163.149	264.997		394.84	336.702	122.307		59.7324	189.356	97.5476		419.675	178.029	81.2672
349.452	178.761	30.7539		215.563	275.307	139.375		61.4635	218.879	229.403		418.73	339.106	121.783		46.132	166.492	78.0343		447.707	175.932	86.0749
358.225	171.77	11.6344		213.051	270.69	122.307		76.6536	219.644	239.726		394.235	334.263	106.221		72.2483	149.004	86.5553		442.66	187.649	89.9829
373.847	206.238	24.0815		212.83	281.813	101.865		63.8874	211.011	248.434		396.358	346.953	105.167		58.6328	173.245	92.0713		453.926	182.321	90.6424
391.484	151.859	25.9291		224.761	268.615	122.848		69.749	207.478	253.509		416.914	327.424	82.8223		46.6914	194.71	97.4302		452.84	176.364	86.1644
409.014	153.597	26.3474		241.958	278.116	111.049		84.5988	220.048	238.054		405.274	332.265	82.8137		56.1451	196.997	103.895		437.733	178.092	90.4394
398.594	163.492	36.2184		237.937	272.95	102.884		80.3412	224.027	238.768		420.354	317.814	127.861		60.9509	198.2	103.926		454.336	168.075	95.266
418.042	166.259	35.4975		220.771	250.51	148.162		74.1808	200.661	259.3		408.69	298.069	135.617		47.2044	204.634	97.8087		421.697	166.063	75.6684
376.427	152.361	49.4165		241.749	277.76	102.61		67.1341	221.769	226.771		422.095	298.608	83.0252		61.3246	182.207	109.887		445.608	179.282	91.3209
354.111	203.81	31.0727		451.637	64.9188	114.884		80.6477	219.742	234.839		416.031	331.379	114.657		47.7664	183.194	92.7236		442.092	167.729	91.7314
340.717	197.511	28.6241		442.087	65.9452	147.186		86.3975	222.489	244.211		403.551	310.962	135.64		68.2013	202.194	112.618		419.785	166.289	87.37
389.625	156.283	44.0579		63.9161	184.777	272.543		49.2482	192.206	254.072		405.95	343.684	127.845		69.0661	170.052	116.122		453.031	164.455	77.2923
362.006	202.539	40.5516		74.611	153.421	277.504		64.1231	203.983	229.799		404.615	340.893	106.539		64.7204	203.913	103.599		425.166	178.191	83.7892
357.715	178.897	17.8724		55.9578	152.739	286.391		66.8746	204.727	224.594		417.696	315.929	77.8518		79.9662	166.807	86.8693		432.304	177.78	83.8132
352.189	207.28	40.4821		74.767	180.068	277.062		54.0349	184.936	265.619		424.641	297.142	115.262		54.6113	167.66	101.377		438.44	163.225	84.5586
418.346	160.889	43.4748		60.8381	196.751	234.177		78.3637	226.01	226.895		421.658	309.695	115.272		67.1997	163.049	106.532		447.506	189.916	92.6628
395.715	206.495	40.1821		59.1585	188.914	266.932		82.3021	206.934	224.704		405.399	324.565	115.024		77.1495	149.913	104.518		440.478	173.385	88.4477
362.793	189.016	17.5994		60.0829	207.739	247.57		250.317	148.592	120.071		397.071	333.635	94.3664		66.3864	182.486	101.048		451.095	161.803	92.9462
379.127	202.302	38.5927		62.2537	209.32	257.249		245.332	125.562	99.7224		398.373	338.966	107.309		73.0055	173.428	86.8373		436.905	183.345	88.5802
367.953	201.727	18.1231		70.2787	199.383	243.762		251.597	140.161	124.978		419.955	336.834	115.442		73.3844	188.155	116.357		447.717	168.055	79.5506
377.893	200.011	27.068		76.3135	198.271	238.075		251.306	136.713	112.258		415.815	322.093	128.698		67.5629	194.356	100.941		453.28	177.878	232.236
399.45	172.886	23.9981		63.4742	176.796	281.954		265.79	153.543	119.944		422.134	309.141	95.1636		77.4378	190.323	132.994		428.76	171.027	216.122
357.311	199.387	36.3372		50.4785	168.632	291.338		230.709	142.082	94.1693		396.952	342.341	82.7568		58.7029	175.738	97.6509		445.802	162.858	226.726
416.143	146.141	49.8558		68.4725	188.418	281.402		241.731	142.91	111.932		397.126	344.819	128.616		65.7402	153.452	79.0437		442.068	164.142	221.05
365.764	163.164	12.094		78.4953	178.316	277.582		231.148	132.195	142.396		401.263	323.352	135.984		67.0263	189.134	125.933		429.374	163.512	217.13
387.136	149.066	29.4636		47.1908	193.643	237.215		246.388	144.504	120.548		401.806	341.768	122.702		55.8338	183.234	97.2378		423.025	165.313	217.488
380.577	155.104	33.7533		54.223	205.371	240.654		249.393	139.9	79.1791		403.931	307.271	72.4817		71.3433	171.933	120.875		437.938	167.941	226.671
365.337	148.702	21.2926		47.9874	159.093	291.371		243.677	141.105	80.2341		418.929	299.153	122.871		73.8356	159.055	116.705		451.706	165.358	221.356
386.836	157.683	33.6765		63.4398	203.365	237.617		251.883	127.247	112.245		410.669	348.281	94.881		67.1779	158.1	93.0469		451.547	163.124	227.543
387.775	152.141	21.3144		72.0948	201.608	262.071		248.708	121.747	136.954		416.13	313.767	123.078		60.0805	159.752	93.0313		455.349	166.232	222.069
391.332	155.17	29.2878		47.7878	203.69	237.387		255.673	126.473	105.025		399.814	355.237	107.486		71.9156	164.422	115.734		441.502	172.836	217.72
384.126	156.133	29.1992		45.9346	191.043	247.745		245.119	120.046	120.119		407.779	335.88	107.851		59.7359	164.318	93.3381		434.858	163.738	217.552
363.794	199.614	23.9201		73.2794	208.513	237.257		235.373	140.5	105.683		424.524	333.03	83.7448		66.4691	165.686	110.587		431.694	179.908	218.148
373.164	199.221	24.125		50.7083	196.987	253.762		240.316	139.395	94.9567		401.204	335.216	122.874		64.4171	166.107	94.0374		437.685	171.501	217.956
365.691	182.923	12.0575		52.8224	209.783	237.376		230.184	132.058	87.8764		410.421	325.684	108.149		70.4695	211.804	113.098		447.227	165.224	224.256
353.687	199.177	24.4253		59.4173	153.911	282.574		232.688	132.577	133.164		416.16	320.13	116.152		79.1663	159.911	120.787		423.453	170.277	218.732
366.732	148.025	49.549		57.5985	189.786	263.04		229.295	150.994	94.4297		419.089	319.919	72.8669		78.4266	179.754	116.415		444.399	160.766	229.163
402.448	148.405	36.3983		67.4106	209.587	243.375		234.954	117.598	87.8898		420.164	319.561	108.232		79.0599	155.172	112.926		423.868	163.725	236.08
395.914	169.849	32.475		77.8273	175.046	282.14		264.928	130.413	120.877		418.391	308.459	79.1538		74.2125	196	125.798		427.188	188.649	219.1
393.018	155.798	49.5505		58.7423	180.631	277.494		235.384	149.973	81.1036		414.986	321.318	123.006		47.4473	179.196	101.065		447.927	161.783	230.828
378.956	159.28	38.6473		78.0479	210.335	262.825		242.549	138.323	89.1028		421.981	305.072	73.5457		68.9767	161.845	112.941		446.151	166.246	218.916
406.557	174.651	33.465		55.8437	178.912	282.066		241.386	128.943	127.005		406.917	311.047	128.87		75.3185	187.562	121.243		427.726	167.342	231.704
389.401	161.878	26.6916		66.4181	197.503	254.251		256.292	139.916	81.1693		421.406	314.174	108.462		75.0343	185.133	101.693		427.39	168.164	225.468
362.603	182.127	17.6401		61.5342	211.162	240.685		254.136	133.592	101.288		394.849	337.431	84.9331		54.5617	172.368	107.323		427.416	166.121	220.086
412.711	152.945	35.7287		55.661	210.042	234.401		242.145	122.289	113.029		424.33	302.906	97.1928		79.2906	197.265	133.513		433.608	169.736	221.15
389.667	157.805	58.069		71.9549	204.04	254.056		267.133	148.656	137.972		412.526	358.844	128.404		64.4603	204.587	110.345		441.824	168.65	227.445
390.392	168.077	26.8027		47.8295	192.277	262.814		240.691	129.8	90.0618		399.219	338.431	117.288		80.6473	170.54	93.1594		94.4795	198.973	222.927
358.984	160.78	12.3617		64.5962	173.499	286.92		237.651	136.244	90.2442		394.641	350.075	116.604		70.8647	177.538	94.1692		112.151	205.742	229.364
356.373	170.218	26.8416		44.9264	189.623	254.592		249.637	136.941	133.237		401.784	334.104	129.631		75.3928	160.748	110.225		93.4832	206.775	237.925
379.862	195.228	21.2821		55.9012	192.154	259.421		242.864	139.389	133.051		425.677	302.015	109.675		55.8512	192.788	104.33		86.4706	207.161	227.05
350.22	189.73	29.7786		62.8416	199.3	267.768		257.644	136.67	122.672		424.304	310.497	74.0396		75.0676	168.039	101.819		111.509	215.05	235.349
369.983	192.024	29.5751		68.9377	182.756	278.005		258.795	139.294	137.628		407.864	312.825	73.9397		67.5504	156.181	87.8035		97.3003	221.149	238.433
404.172	165.738	36.3935		62.5806	199.109	258.632		230.619	114.905	107.31		423.412	317.697	79.7848		76.5441	176.313	110.373		85.707	189.433	220.266
405.079	179.251	31.2339		57.8741	171.28	287.441		249.012	143.967	90.5442		423.772	325.611	74.4757		74.0143	188.893	126.993		110.158	224.565	235.208
402.853	161.673	50.4772		74.7233	168.47	283.171		236.834	131.995	82.621		424.503	299.588	74.0626		73.0623	150.225	94.3558		116.088	216.661	232.545
352.266	197.492	29.8715		77.0845	202.153	244.239		265.661	143.09	101.48		422.629	302.528	124.424		59.2853	179.356	101.615		108.977	205.666	232.399
340.455	174.137	36.3572		45.8256	194.981	273.283		232.047	114.059	82.0987		395.121	326.086	118.801		72.6822	157.702	94.2914		92.5452	208.086	230.202
390.612	207.08	29.1291		48.7621	199.033	234.404		248.339	123.009	108.402		394.842	340.662	99.1406		79.7663	176.492	113.431		102.209	221.133	238.643
367.318	147.976	58.3372		49.9905	196.121	273.684		258.06	137.084	108.272		408.762	335.771	79.9241		71.2005	186.169	121.523		107.528	200.144	216.888
371.41	176.074	12.1732		55.9509	200.679	234.181		239.547	133.582	127.402		400.582	346.373	109.482		69.5254	191.421	121.988		108.264	191.245	220.671
396.693	149.226	50.8934		53.2536	174.811	282.652		260.682	134.674	114.017		408.565	321.917	118.674		64.7423	190.505	102.277		118.3	203.465	217.025
397.07	154.561	23.5477		51.845	196.477	241.57		267.523	146.598	90.3854		411.911	296.792	130.429		69.9869	190.17	110.531		105.39	202.937	220.783
390.126	154.818	17.5067		70.624	184.779	274.256		233.481	119.161	114.173		402.173	327.16	130.705		71.272	204.113	121.708		104.731	187.266	217.296
357.704	145.007	27.2506		56.1181	185.678	268.256		257.814	142.729	101.794		398.221	330.177	80.4849		60.4473	179.759	94.6745		106.385	228.67	235.802
393.862	148.862	29.3546		51.1192	200.332	248.711		236.982	124.953	123.054		412.314	341.27	130.627		78.6116	170.585	80.9175		90.3743	212.593	232.925
349.775	165.156	18.0609		50.8531	203.593	254.95		248.181	135.145	122.48		414.639	321.416	109.91		74.7123	161.54	88.574		100.067	208.709	236.123
394.314	150.506	21.5461		64.2312	180.141	278.159		244.555	114.313	113.907		407.38	337.06	125.197		69.3112	196.508	127.068		97.9859	192.3	221.179
396.321	165.821	24.0164		45.0979	190.448	268.678		267.488	149.655	128.169		413.947	174.228	177.719		72.3433	153.075	98.4849		96.9291	216.349	233.142
371.004	150.134	28.5612		46.8436	150.216	283.379		248.204	139.478	103.157		397.786	152.821	170.74		71.0577	177.608	105.179		109.713	206.883	221.168
370.579	173.235	18.0583		75.8334	207.335	254.517		236.793	142.589	84.0212		422.091	157.497	165.945		73.2205	196.204	107.914		114.76	210.353	221.357
371.751	180.341	18.3371		70.8255	205.341	241.775		244.269	116.92	127.886		421.125	162.17	165.46		61.1951	170.854	80.626		111.883	202.051	217.925
360.978	146.456	32.1205		70.5109	209.662	231.681		255.173	141.564	95.705		410.068	184.152	163.414		56.8243	188.309	104.552		106.07	211.934	236.652
343.353	197.241	36.2459		78.6068	191.4	274.109		242.832	125.598	123.717		421.034	173.359	156.167		59.7205	156.761	81.482		112.094	191.244	217.414
394.333	158.287	28.7048		69.7913	212.721	259.081		244.57	128.885	109.441		409.735	180.593	174.901		68.0732	168.297	102.181		92.1228	217.016	236.547
376.206	199.48	18.7592		53.8404	173.883	287.849		249.06	148.37	108.427		420.097	175.034	167.734		70.8475	184.135	117.005		95.0352	204.74	233.743
402.12	169.342	34.0798		51.6057	183.729	269.139		263.142	147.568	102.947		404.278	183.218	174.391		76.5966	175.799	98.6313		118.184	211.005	230.654
357.123	172.641	21.4133		55.8268	196.361	274.537		229.293	128.569	84.0446		423.61	149.723	168.073		66.9405	208.455	107.283		118.784	214.519	227.56
417.632	153.766	31.57		64.6027	204.593	263.999		259.018	139.939	128.42		417.566	164.721	159.821		75.4886	212.888	108.279		91.16	191.697	224.071
411.844	164.59	38.6765		57.6279	193.296	232.2		242.64	135.278	84.3877		411.738	177.123	162.435		48.9462	177.154	81.6569		100.356	225.727	236.799
371.774	189.422	12.8867		76.1581	203.263	238.178		237.472	134.64	139.895		417.629	190.174	152.525		58.1844	168.95	89.4279		88.7694	204.661	236.8
371.079	150.794	51.289		58.8009	206.531	258.984		238.064	138.659	134.834		421.821	161.835	152.801		44.0733	202.444	104.436		94.117	223.42	240.546
342.073	201.276	21.4125		78.9905	210.517	245.124		240.247	146.229	84.2502		394.391	187.987	175.215		72.8824	184.715	127.445		102.14	218.976	231.209
346.249	194.658	27.0223		68.6024	208.459	237.987		265.895	140.991	76.4277		416.79	172.17	159.168		46.112	174.954	88.325		86.5335	209.978	233.705
366.193	196.487	27.2896		63.7784	185.416	278.443		263.254	143.064	91.75		426.371	149.477	162.743		48.9385	167.61	81.9513		100.657	205.603	231.232
413.837	174.884	37.9763		58.9569	212.552	231.501		232.205	118.215	76.764		409.528	153.108	171.352		64.2173	175.434	114.029		111.87	213.922	228.437
358.763	158.299	18.1717		74.1837	199.762	234.709		267.551	143.954	97.2698		398.223	153.437	186.348		62.5191	163.567	107.632		92.1137	205.373	225.366
387.565	168.777	31.7302		73.3095	188.769	278.178		266.345	144.059	109		425.118	165.621	156.812		60.537	207.574	104.777		103.621	192.683	222.194
342.351	163.068	18.7768		49.4183	197.669	268.839		254.301	148.928	109.887		423.346	177.518	152.686		44.026	190.551	101.823		104.755	205.547	233.637
341.907	170.041	20.8346		74.6193	209.922	259.531		266.629	141.312	83.7604		399.566	184.832	178.841		65.3789	162.236	88.9022		105.502	210.311	231.201
397.474	148.892	45.6014		53.1259	193.295	255.631		242.92	143.987	92.1181		395.016	165.372	186.031		55.5454	180.807	111.118		117.512	205.742	229.086
353.176	146.357	27.3768		59.4982	198.273	239.122		257.002	149.874	135.154		409.15	180.627	168.919		73.9115	205.722	127.518		89.8011	219.225	241.79
389.215	154.182	51.3782		56.285	157.194	288.443		248.715	146.404	97.9595		418.866	176.207	162.948		59.1443	189.563	114.381		87.1399	193.072	226.266
354.884	147.852	21.9198		52.7779	189.173	264.732		257.968	144.942	140.545		423.189	184.793	156.118		73.4341	209.466	122.912		113.418	209.804	232.265
[truncated: 9,168 more rows]

## Sheet: Brp_male
BrpG4_1				BrpG4_2				BrpG4_3				BrpG4_5				BrpG4_6
X, Center of Geometry (µm)	Y, Center of Geometry (µm)	Z, Center of Geometry (µm)		X, Center of Geometry (µm)	Y, Center of Geometry (µm)	Z, Center of Geometry (µm)		X, Center of Geometry (µm)	Y, Center of Geometry (µm)	Z, Center of Geometry (µm)		X, Center of Geometry (µm)	Y, Center of Geometry (µm)	Z, Center of Geometry (µm)		X, Center of Geometry (µm)	Y, Center of Geometry (µm)	Z, Center of Geometry (µm)
330.718	16.2558	134.577		218.598	133.807	21.4314		217.649	135.699	31.4527		300.1	218.466	31.3783		390.196	18.4492	51.0175
336.551	13.265	135.218		205.482	121.176	34.0648		209.508	130.033	34.1929		305.937	217.072	32.8129		400.739	17.1584	56.4219
335.378	22.7387	136.908		219.93	142.622	23.6046		337.322	281.681	295.129		320.242	331.914	301.366		407.385	12.6574	56.6611
322.935	8.26095	159.991		213.178	115.861	34.0418		336.377	299.953	276.957		313.849	331.699	279.121		377.136	27.1125	57.8387
332.065	13.8723	186.523		211.592	135.518	24.3691		347.746	288.946	231.037		326.114	314.484	289.093		396.534	14.1805	58.047
322.517	18.5684	192.405		196.079	121.314	25.8881		350.076	304.053	230.972		329.225	313.226	283.042		399.769	8.2781	58.8944
337.258	6.96798	172.546		204.178	123.319	26.4409		359.086	336.718	201.111		344.95	322.741	284.113		386.85	17.8709	59.2994
329.351	10.926	173.903		206.076	130.829	26.1193		365.371	333.209	201.204		307.519	306.766	296.196		388.516	22.8577	63.4256
341.134	7.94137	179.772		210.43	120.688	28.1785		352.773	319.982	223.704		337.699	323.608	278.729		393.287	12.2649	65.4547
190.973	109.762	57.0263		202.596	128.969	32.3763		337.97	290.743	226.915		352.002	306.674	280.362		394.079	15.5658	99.9226
324.02	293.1	220.094		212.24	106.187	32.1342		309.873	293.876	227.487		340.661	337.082	283.998		395.089	21.4085	100.437
332.912	290.405	224.758		307.817	320.397	263.184		329.333	285.778	223.431		304.67	312.988	286.668		407.112	27.96	102.78
355.811	285.276	267.639		357.318	296.634	267.256		336.844	295.515	227.567		339.397	307.899	274.765		411.022	315.933	33.1734
345.413	302.097	233.026		331.302	332.378	263.325		342.603	303.35	223.511		315.193	322.798	296.027		405.305	319.918	37.5516
354.614	313.459	245.495		365.057	304.249	268.401		309.996	281.597	214.886		317.791	328.093	298.463		412.335	320.676	39.4708
324.974	298.042	215.686		360.564	308.393	273.674		362.201	316.531	222.706		326.663	308.951	279.089		413.801	310.499	48.2881
322.437	303.03	219.871		362.947	308.67	265.594		365.668	324.549	208.023		307.217	307.275	289.534		376.132	271.95	224.326
332.985	322.605	217.382		364.338	300.59	270.035		358.824	326.615	208.488		341.191	317.293	281.486		392.053	267.76	209.782
351.318	328.326	227.651		367.517	312.308	265.532		345.692	337.527	226.962		350.741	322.827	271.857		396.806	279.834	213.291
347.049	316.494	250.646		316.492	324.947	274.819		366.366	313.206	223.181		329.284	306.278	279.311		376.179	264.468	212.713
341.175	299.316	217.288		343.215	298.87	266.728		317.993	291.755	228.388		345.444	325.417	287.227		379.602	270.834	220.273
335.919	310.907	254.087		364.324	311.744	271.462		303.433	288.07	219.13		318.79	312.474	278.301		401.988	277.652	214.374
325.354	299.783	229.901		362.534	306.075	276.402		352.171	319.914	216.126		312.579	327.974	282.542		382.928	270.451	225.722
330.95	299.795	228.358		357.181	308.643	267.471		357.087	339.457	208.655		311.054	306.804	284.997		384.007	270.43	210.93
350.612	327.107	239.36		349.339	301.696	263.39		346.581	300.873	228.161		313.922	330.796	275.655		394.181	265.727	214.299
345.956	330.662	221.947		343.008	303.185	263.94		303.164	282.994	215.916		342.443	313.468	278.415		392.915	273.851	210.925
325.357	297.636	223.359		366.526	305.024	262.59		363.472	328.542	224.1		322.916	304.423	278.613		382.459	267.749	231.457
353.859	334.093	222.206		322.861	329.737	266.869		360.403	323.684	216.034		335.712	319.556	283.203		393.114	267.738	232.594
322.166	291.277	256.356		353.031	304.658	271.959		356.072	339.466	223.196		349.064	304.61	275.515		378.247	268.114	216.117
351.764	302.379	222.28		328.135	324.992	284.558		323.391	292.705	228.309		312.883	322.782	285.344		375.998	266.49	227.221
336.606	296.017	223.039		364.78	69.471	209.247		344.791	314.06	216.422		305.219	312.498	278.619		385	267.978	214.413
341.008	310.883	258.581		346.866	67.516	216.811		359.953	328.011	202.901		314.367	317.881	292.65		408.495	275.907	215.086
321.219	312.125	218.298		60.46	202.132	145.717		314.754	286.734	216.408		335.009	309.874	279.114		376.88	269.225	208.335
331.512	318.748	242.916		65.224	200.853	146.057		302.424	285.886	203.768		354.914	323.977	272.252		410.412	272.299	222.85
330.766	328.148	230.536		69.9893	181.042	143.33		315.145	282.993	210.272		306.443	309.802	292.912		400.04	264.642	211.6
337.627	291.988	218.299		65.8038	205.434	143.754		313.9	294.165	220.376		314.65	318.24	284.88		387.019	264.498	208.508
326.431	323.739	224.59		68.4329	194.705	140.445		339.093	303.325	228.797		313.266	323.533	290.412		409.918	268.343	211.292
334.492	327.927	224.204		69.3616	198.674	144.847		364.266	336.803	223.793		320.484	346.907	275.643		387.941	267.721	227.51
339.382	332.024	218.331		69.7487	203.001	140.792		328.387	294.671	225.064		344.346	318.292	277.721		376.994	272.71	212.087
327.094	314.786	244.059		65.8852	181.669	145.302		358.776	325.061	225.494		347.374	328.246	282.832		383.542	265.042	223.23
18.5538	193.375	208.732		70.0602	185.32	141.995		345.717	339.762	220.829		345.384	309.503	276.377		375.902	265.807	218.509
31.4	198.837	205.098		64.1774	192.922	141.959		333.812	339.423	204.37		308.164	314.033	289.847		374.853	277.635	217.992
28.7189	188.804	201.869		63.69	186.116	145.529		351.585	343.767	211.697		344.627	319.079	281.425		214.244	112.673	156.996
29.7429	181.278	202.077		42.768	171.132	264.609		361.758	330.457	211.56		340.401	312.801	273.382		224.728	125.503	175.278
30.1646	188.312	206.899		20.3627	163.322	275.76		321.155	286.016	212.868		322.789	318.025	290.2		223.854	115.162	176.866
35.4644	170.179	199.456		55.1147	186.52	264.674		352.548	313.788	217.587		313.931	315.198	287.477		224.733	96.4092	141.142
35.3665	204.485	199.888		55.2775	169.874	268.686		358.147	335.23	217.974		319.95	313.693	285.389		215.181	122.704	146.488
32.9324	184.802	199.932		46.8223	183.733	266.849		353.776	342.968	200.384		342.628	328.298	293.509		226.397	125.283	147.457
33.0267	193.011	201.136		31.8683	156.917	265.183		356.054	304.192	230.474		331.049	323.374	289.82		214.599	123.035	156.902
28.2095	171.102	207.527		18.688	166.582	271.728		365.574	319.263	214.273		316.365	327.631	275.347		217.73	125.31	152.36
32.1644	176.625	200.002		24.6525	165.165	264.89		339.659	336.377	222.046		339.102	329.167	277.292		191.063	107.631	157.033
26.5989	204.377	200.79		42.6306	167.166	275.816		321.977	286.448	220.76		340.454	322.49	283.259		190.111	105.73	162.022
28.4574	181.98	207.665		20.9033	169.636	264.933		339.044	142.248	99.9945		318.872	333.206	298.668		223.248	125.252	159.949
26.546	196.892	207.811		25.3768	181.761	265.553		358.24	144.523	95.5664		342.828	337.001	291.119		198.449	119.212	143.268
33.2212	169.431	204.686		60.1082	165.083	266.718		342.109	147.417	89.5541		344.689	324.73	278.657		203.4	117.561	143.803
26.1817	185.381	204.333		36.8222	168.751	266.993		362.954	149.006	83.0108		317.673	333.643	288.688		215.096	97.2428	142.927
31.6516	203.278	204.31		29.2787	164.105	264.954		357.432	148.642	83.5931		315.781	319.969	279.55		228.367	123.039	157.987
35.1836	180.436	197.478		58.8537	177.304	266.829		347.613	143.77	84.3776		300.528	309.916	276.665		218.306	116.472	137.977
19.0511	205.806	205.734		54.8722	166.763	273.139		351.139	149.607	84.0813		304.8	312.124	296.314		224.369	120.07	144.78
36.3519	189.216	197.573		60.7071	169.56	265.207		339.935	142.322	90.7814		316.136	304.718	280.157		204.726	116.033	153.568
22.3739	191.273	205.896		30.197	154.858	272.007		347.971	150.572	97.1088		149.859	144.472	109.713		209.281	113.02	149.856
352.316	288.9	189.505		58.6746	161.555	272.014		329.226	143.634	113.611		149.168	140.977	91.3231		216.716	119.19	149.923
327.625	286.881	158.307		41.0544	159.538	277.414		348.347	144.339	92.8483		203.621	134.472	107.49		202.14	122.709	145.328
335.903	285.555	196.576		41.488	155.731	282.599		329.044	143.331	97.5369		153.982	136.957	104.186		219.58	115.768	154.833
344.722	294.936	203.203		42.3223	172.752	273.098		336.332	146.222	93.4709		149.567	141.591	96.2892		204.879	123.327	156.192
320.941	283.793	150.251		38.158	173.224	273.201		342.172	146.628	98.0614		172.899	136.477	82.8365		221.575	126.882	145.977
331.926	291.796	161.767		38.971	160.622	282.262		345.239	149.526	86.1065		159.059	127.257	103.644		408.58	146.58	61.879
328.528	283.534	203.116		48.1599	157.155	278.27		363.821	153.285	93.9074		166.43	135.528	96.814		407.061	266.9	178.765
339.98	290.732	197.767		33.0104	176.971	271.467		335.226	144.147	87.8141		155.54	133.611	111.375		396.299	269.912	179.644
351.743	293.071	204.063		44.7758	176.348	271.824		356.929	151.499	94.4306		198.349	116.74	97.5465		412.14	270.908	160.201
333.099	289.958	181.574		53.9289	153.346	274.457		354.709	148.788	88.0193		195.013	129.739	89.162		400.22	273.155	153.93
339.364	287.433	182.367		46.0111	150.138	279.208		309.569	161.644	185.77		206.321	141.306	86.0679		403.549	281.835	153.538
333.402	296.435	204.947		36.8015	179.775	268.867		321.438	191.407	184.345		178.103	112.575	110.669		378.626	270.445	191.161
346.555	309.048	206.947		50.0476	164.792	272.128		309.297	151.508	168.863		152.629	128.489	101.473		372.989	274.855	179.808
354.476	311.096	204.542		41.4491	180.563	267.376		300.859	163.653	170.132		206.435	139.93	92.0936		412.49	287.743	153.642
334.253	293.288	169.856		61.244	160.865	264.198		314.261	142.695	171.63		187.52	127.677	97.7564		382.946	270.098	169.198
329.717	285.112	162.963		45.7766	169.484	272.002		314.112	143.971	161.316		164.617	124.224	110.289		397.698	265.513	168.458
338.594	291.947	152.153		30.2154	159.141	269.355		304.292	165.277	186.961		207.922	144.414	81.0253		375.434	271.057	185.996
350.637	303.124	207.673		32.9619	150.463	284.497		309.679	146.967	172.615		172.128	142.434	97.2431		398.996	264.034	187.783
339.162	299	205.075		25.236	171.633	272.034		300.52	147.701	187.96		206.247	131.165	81.3522		406.457	276.642	185.085
343.583	305.245	205.602		19.578	156.255	278.947		302.856	176.515	162.513		192.094	134.171	92.088		381.971	267.633	154.494
331.793	283.718	193.175		48.923	172.996	269.679		307.623	142.931	188.676		157.782	140.531	89.9493		400.037	272.095	146.969
333.068	290.081	193.226		21.7596	176.654	266.068		305.348	145.427	180.645		213.023	140.569	102.492		395.282	276.739	191.342
341.778	289.838	159.902		38.2011	164.123	278.942		308.698	142.27	163.725		182.749	114.577	108.606		407.558	279.412	188.551
329.801	315.607	145.162		18.757	165.469	267.012		307.985	151.888	165.017		147.284	139.301	101.686		407.941	264.389	170.223
340.168	300.431	199.427		27.7776	152.224	266.184		303.256	175.476	180.635		199.404	125.004	92.7702		401.212	279.119	146.755
346.027	285.142	184.515		27.8672	175.931	267.835		307.712	157.271	181.668		188.29	114.847	111.51		390.697	278.639	185.699
333.5	296.41	193.59		26.1387	166.905	269.392		309.584	177.96	181.104		209.281	137.821	83.8513		385.383	269.39	163.665
332.534	316.305	204.825		32.6301	149.49	279.551		309.37	150.055	176.762		188.347	131.519	90.1085		395.251	268.427	175.446
339.942	312.139	207.392		28.5156	149.419	274.248		307.23	164.332	181.559		176.463	123.432	109.644		408.457	274.215	180.243
334.955	293.051	185.859		51.4739	178.88	269.843		304.721	159.65	166.774		178.406	129.808	109.189		410.579	281.249	154.913
346.77	304.791	199.863		60.869	156.937	265.875		304.939	155.267	177.155		162.89	133.48	100.315		403.207	274.786	198.133
340.002	287.534	165.5		25.1454	164.124	272.086		303.396	142.781	193.23		159.323	137.865	105.99		400.593	284.395	171.458
338.699	288.394	146.451		56.3342	181.693	267.91		312.576	149.952	182.137		152.446	139.229	84.1879		383.215	264.892	147.426
333.391	285.848	175.289		54.0379	163.785	266.502		303.141	161.161	176.799		199.871	122.803	100.27		375.639	265.631	195.175
332.135	288.764	167.555		32.3826	183.478	268.073		312.51	157.452	193.382		170.558	134.738	106.546		395.075	278.319	195.585
341.362	297.86	167.582		45.3559	161.549	274.996		304.504	179.148	167.135		167.582	110.028	111.372		412.388	266.706	198.681
330.383	312.485	160.098		54.3537	175.196	270.385		311.599	143.344	177.755		209.374	140.055	98.0905		406.764	264.386	155.272
335.456	287.146	205.738		20.0775	172.782	268.536		301.1	147.688	178.283		162.565	116.57	112.601		407.063	273.193	191.447
337.001	288.592	161.062		308.902	315.458	64.4402		345.145	332.24	132.79		201.632	141.114	79.4549		411.462	272.037	188.362
325.678	309.056	148.222		305.64	308.172	61.1868		340.864	325.613	125.318		193.428	126.009	93.7366		394.606	273.018	185.852
337.624	285.558	188.877		346.154	307.246	71.706		363.784	313.255	147.625		201.846	133.206	85.0121		408.523	270.301	155.255
341.666	303.349	201.606		302.999	304.824	56.7745		302.298	300.583	132.597		183.881	126.382	109.824		378.922	273.388	195.431
336.573	291.26	157.622		306.521	310.471	52.4731		345.014	329.428	125.488		167.537	144.517	100.307		401.986	281.214	195.844
325.399	326.139	207.769		333.436	296.886	64.6534		335.833	337.622	135.382		351.768	307.487	137.502		375.451	269.037	182.028
179.858	229.215	58.1401		325.812	299.426	61.7584		365.797	304.146	122.047		346.411	316.371	142.649		387.175	266.934	195.721
185.081	237.773	64.4927		317.359	298.499	44.8551		339.494	319.66	141.561		346.477	304.224	129.108		401.949	284.514	165.536
179.292	214.902	65.882		313.913	301.734	64.5456		336.533	319.303	128.182		327.352	316.853	134.122		401.977	277.86	191.51
195.668	257.252	51.3465		300.991	316.201	64.7966		350.332	323.994	128.127		347.429	304.898	122.552		399.414	273.015	199.372
168.237	233.924	57.6122		318.488	306.172	50.3469		312.346	304.76	136.744		352.545	304.263	148.407		403.873	265.195	194.07
184.936	252.925	44.1049		320.569	316.67	67.5831		345.188	327.992	141.521		337.864	315.365	144.819		411.246	265.106	189.614
191.385	229.302	52.2316		308.661	303.1	39.6851		328.325	319.887	133.177		352.602	343.396	143.042		399.004	271.661	189.256
170.419	227.382	44.7784		308.822	306.972	71.5704		321.023	292.216	128.539		355.367	307.87	117.947		403.881	274.035	149.31
196.468	234.492	52.6637		305.465	312.316	46.189		323.79	293.065	133.558		319.845	320.095	149.754		392.898	283.173	192.595
193.191	249.008	54.3516		354.785	297.466	67.1426		331.742	302.159	136.877		350.115	341.979	149.651		403.453	282.104	192.398
195.558	268.723	48.0529		322.26	298.279	50.6466		299.958	302.758	137.164		351.576	317.678	147.929		411.245	264.978	184.124
178.385	251.547	47.8629		330.296	308.572	61.7418		345.943	303.153	142.272		324.595	310.21	138.299		404.192	291.81	192.393
186.098	249.191	59.5089		302.036	298.238	56.8822		303.892	306.156	142.175		350.905	327.943	146.876		394.125	266.094	183.076
181.423	232.774	66.3888		323.496	315.955	62.4347		321.745	321.825	139.912		347.102	318.149	147.893		377.008	270.207	166.846
188.926	232.833	61.385		306.545	303.295	45.9018		348.222	306.951	128.386		353.859	331.583	143.435		406.938	281.615	150.436
191.37	258.645	49.7144		302.423	302.898	41.4447		331.207	294.461	121.559		353.136	329.608	123.353		400.614	266.682	184.093
192.944	221.22	57.4653		352.294	301.053	70.0281		351.36	323.804	142.401		354.409	311.687	148.559		396.949	271.652	192.798
185.931	265.699	50.0424		324.963	297.541	41.6388		305.924	288.747	126.639		346.281	313.245	148.513		413.02	276.751	190.626
174.691	229.648	56.8539		302.743	296.57	50.3287		310.306	311.622	129.392		314.113	312.569	149.183		402.301	266.734	150.861
168.732	259.421	63.065		313.835	303.492	41.4127		298.215	292.306	126.145		321.243	307.618	134.901		383.701	278.684	178.066
192.618	218.561	64.6957		314.857	302.201	47.5699		349.788	300.576	119.923		354.29	337.945	147.02		384.311	265.931	184.205
325.388	147.948	217.101		343.717	313.399	70.0414		311.724	281.842	120.251		350.325	312.482	126.465		408.377	279.889	196.189
351.292	157.923	217.857		304.44	308.2	41.8816		339.39	312.94	130.501		328.104	320.168	148.609		381.119	270.983	199.927
337.638	166.623	218.048		352.88	313.86	70.4517		328.257	309.944	120.459		355.419	308.22	130.35		391.157	267.381	189.752
347.146	159.024	232.758		338.732	298.085	58.2532		363.459	308.031	148.625		339.502	321.197	140.303		392.201	271.796	196.845
355.483	185.269	233.119		301.865	307.739	46.515		354.265	311.23	123.323		338.221	311.926	118.669		404.329	272.374	186.312
341.262	160.019	234.95		338.109	316.027	70.2449		321.058	326.368	145.996		341.756	320.564	150.109		382.491	270.221	158.002
355.459	178.586	235.008		357.595	317.196	65.9829		326.943	328.536	145.672		345.708	304.208	143.629		403.335	269.021	173.764
343.669	162.667	220.98		312.021	309.295	48.6169		299.63	289.417	120.461		316.5	304.929	121.316		377.894	266.112	200.189
351.59	162.079	223.017		316.759	307.46	70.186		306.724	298.684	137.829		350.426	307.773	150.087		412.463	275.085	184.699
344.68	191.791	223.126		305.731	295.919	42.3722		325.263	299.302	133.877		337.739	302.672	123.861		394.603	265.146	152.183
346.269	157.661	223.41		322.469	324.626	58.2782		342.545	304.969	128.99		348.741	309.902	118.287		413.178	274.153	197.428
338.437	145.207	241.663		311.323	306.92	42.1311		298.953	295.944	149.102		323.361	314.053	145.918		400.075	291.08	111.631
352.009	170.854	225.239		319.286	301.557	65.2303		300.701	297.866	140.608		312.392	305.03	147.669		396.72	266.17	127.561
355.27	150.402	215.702		319.434	321.266	70.5033		336.107	305.967	120.51		356.032	310.138	124.559		401.92	282.433	128.775
348.013	166.215	216.333		299.867	310.494	62.9096		341.206	317.621	134.011		347.325	309.831	145.84		408.848	274.373	117.395
350.497	157.821	229.704		326.196	306.937	65.3454		321.235	310.3	131.269		351.29	320.727	141.33		409.112	290.701	127.164
322.855	147.956	105.091		319.799	307.608	63.507		325.261	337.761	146.116		326.211	304.484	132.417		392.176	281.934	100.542
323.236	147.941	114.944		299.672	310.692	55.8363		351.496	306.246	142.565		322.96	306.304	121.433		411.016	296.395	127.881
344.291	144.376	85.2591		334.784	309.161	58.4074		346.528	319.215	140.484		355.672	319.396	143.668		403.707	269.619	118.1
330.832	149.093	115.746		314.558	305.716	52.1072		348.444	312.775	123.738		343.509	319.437	143.886		402.383	291.795	127.402
351.292	145.582	96.8146		299.737	306.56	51.7371		344.784	322.875	146.045		318.87	304.382	142.441		407.107	265.696	102.991
326.754	149.656	129.701		312.502	298.56	42.7233		299.39	284.951	128.603		342.329	305.154	122.382		409.842	266.081	87.2735
346.332	147.752	107.304		311.979	318.389	67.6058		339.475	311.617	134.334		342.911	310.608	142.266		397.215	288.07	118.757
328.58	151.215	135.152		318.7	299.363	58.9469		351.813	304.189	123.866		346.394	311.077	132.993		398.904	268.12	104.725
335.186	145.723	118.792		303.799	321.083	52.5617		325.525	313.801	126.751		328.839	315.45	146.306		399.776	276.873	130.053
324.114	144.652	119.553		325.903	323.373	48.4754		344.498	326.717	133.694		311.8	190.585	189.527		411.559	266.048	109.424
323.279	151.537	119.814		302.032	316.306	56.1503		312.253	317.399	143.19		303.936	186.108	183.039		396.291	264.69	121.929
327.969	150.29	110.317		339.691	309.449	68.3734		316.477	318.246	141		303.818	153.537	175.987		381.24	276.863	94.0452
354.731	145.291	79.432		313.417	311.778	65.7486		316.743	332.084	142.705		306.592	156.231	163.416		394.226	289.616	93.8472
329.204	144.825	102.41		320.116	303.58	43.1549		334.221	305.17	137.865		302.609	158.83	181.544		403.66	265.758	123.339
347.736	148.06	103.096		326.63	317.824	56.5049		335.518	338.594	143.421		302.097	163.071	176.095		411.723	269.783	95.9805
343.072	144.381	112.794		329.844	313.476	68.2408		360.107	302.244	133.793		308.67	184.436	186.785		400.046	268.496	111.571
329.22	150.546	122.836		323.867	312.158	58.7119		326.459	342.479	139.08		295.474	153.626	176.633		389.048	281.907	110.894
325.614	155.297	122.819		305.748	304.457	51.9033		334.14	324.794	136.486		298.56	160.256	187.42		218.773	257.775	208.843
337.884	146.19	114.223		364.667	302.894	60.8128		330.662	298.324	131.619		308.415	155.081	157.287		391.139	137.083	139.795
174.828	124.858	160.937		307.117	298.908	67.9277		323.35	302.925	127.523		301.99	166.396	157.762		385.203	139.193	145.9
181.243	118.951	149.308		299.705	311.891	71.5127		338.733	326.766	129.573		305.956	159.455	157.609		380.319	134.781	161.901
195.665	136.671	163.103		306.102	312.335	68.508		334.429	307.705	127.7		297.425	155.713	187.858		28.1315	185.81	71.5332
172.433	132.754	161.045		313.236	299.563	52.5516		310.583	309.541	134.959		298.654	165.159	184.257		22.0241	186.821	72.9474
181.448	108.817	145.988		308.146	296.564	49.4131		352.019	332.284	146.85		301.665	155.072	157.751		30.5241	168.653	77.4411
170.717	122.675	150.74		334.939	300.651	58.7384		329.573	308.902	132.508		296.536	172.246	177.874		33.6554	175.88	79.9688
179.67	126.137	148.676		301.361	295.83	43.4217		331.992	317.19	139.033		301.341	152.486	171.606		33.2978	191.031	82.1159
171.272	129.082	151.584		349.149	308.617	66.6254		304.583	309.941	130.132		302.203	194.037	171.206		40.9847	154.369	75.9144
163.742	112.614	160.659		303.026	300.18	62.7724		301.743	296.362	125.302		307.491	157.863	177.768		42.3477	185.6	84.2746
162.475	120.468	146.222		318.136	299.203	71.559		350.672	318.393	136.056		298.884	168.787	182.015		28.5449	190.314	71.654
175.604	130.309	148.268		326.843	299.393	68.941		315.734	298.93	135.169		302.23	181.834	182.219		38.7252	189.203	84.4283
165.931	130.455	163.482		332.285	304.054	61.5106		335.728	310.381	132.166		301.706	170.246	184.717		27.0907	159.056	71.6385
166.384	123.803	177.976		360.978	299.089	56.7841		325.347	322.328	122.546		299.113	164.78	173.867		34.6463	160.461	76.0479
176.837	126.609	167.114		315.263	192.859	25.5646		356.261	303.383	146.817		291.571	164.505	185.415		23.0533	191.249	72.0866
174.49	132.685	172.569		307.219	174.654	25.9112		303.072	311.787	147.454		308.538	154.97	174.238		37.3427	155.535	80.4129
174.928	125.545	148.783		310.759	190.565	33.1885		334.298	314.907	134.716		300.294	174.864	160.229		41.1916	149.56	78.1456
170.919	129.356	157.105		317.861	187.186	31.7346		341.199	319.559	127.714		299.232	160.72	160.742		30.9323	163.388	72.7049
186.692	129.302	155.868		309.689	189.514	26.8754		337.491	308.09	138.698		301.875	169.664	188.915		33.5942	173.815	72.0682
195.625	120.228	161.212		321.057	193.84	29.0663		358.976	303.998	122.086		294.657	157.681	183.215		38.2858	180.346	84.8139
169.489	128.835	146.969		313.252	190.114	19.6905		353.015	327.815	152.522		295.658	162.131	180.25		36.9415	186.298	81.3638
172.97	134.574	146.259		322.032	206.24	33.5321		309.128	309.754	139.685		315.98	201.055	188.915		27.2069	178.506	74.7919
178.676	122.892	163.87		316.042	195.675	31.7577		358.857	308.389	143.154		294.402	166.472	180.129		41.7138	189.441	87.1257
181.766	127.792	163.65		303.443	179.005	27.1634		327.839	287.796	122.303		303.833	190.398	182.396		32.3349	180.445	74.7141
175.771	106.158	146.808		313.413	197.43	21.0581		341.895	309.943	125.652		303.354	164.117	189.411		26.4276	183.363	74.3238
165.83	127.95	179.342		312.207	160.2	32.3907		321.086	321.201	132.49		297.544	159.021	175.108		42.1702	157.243	83.5688
169.421	118.927	153.617		313.721	162.734	27.3839		364.988	311.001	124.883		297.619	181.855	180.453		42.5291	156.371	79.3978
182.835	107.999	149.732		301.538	182.184	32.2502		340.426	325.294	138.641		306.139	152.832	180.77		27.7627	186.843	77.0977
172.2	117.713	149.121		313.574	182.519	27.8874		320.675	170.934	21.7564		355.148	345.168	217.971		36.4099	151.251	74.9745
169.362	132.626	186.755		323.899	199.171	32.3739		307.38	170.708	17.9292		312.274	309.438	221.767		37.6055	168.714	83.3204
192.583	128.228	147.05		311.08	174.874	22.534		326.744	164.913	29.7012		341.872	354.81	210.197		36.7599	165.603	75.6094
177.347	122.375	168.829		307.261	182.248	29.1709		316.762	166.333	19.8015		296.688	315.584	214.975		31.6863	155.994	72.8159
186.632	128.5	147.675		319.023	200.951	28.2662		323.875	160.464	26.3578		294.533	322.071	215.023		24.47	163.959	73.1034
167.988	131.23	168.669		312.397	177.515	28.0664		300.104	160.54	32.2057		305.747	309.524	216.629		27.3872	175.076	70.9517
178.041	131.664	164.572		308.671	156.649	28.2207		319.158	177.732	32.5483		349.532	352.779	207.031		43.2617	145.732	76.9014
189.234	135.781	154.14		312.683	186.73	24.0309		326.914	182.819	33.5535		315.737	321.015	226.649		41.519	180.686	77.9003
163.744	119.262	173.753		318.079	186.638	24.0492		320.481	188.55	33.793		296.15	323.477	220.117		36.4203	183.787	75.3629
164.426	118.887	153.802		313.258	167.764	24.8068		301.952	198.344	31.621		353.161	351.495	224.545		31.0473	190.967	77.8213
162.913	129.494	168.492		307.655	170.412	30.6668		321.7	162.945	22.3998		313.834	328.559	226.026		32.364	182.076	81.0204
178.666	134.971	157.76		302.788	151.762	152.273		329.963	189.593	33.5085		291.51	319.776	209.967		41.9763	162.543	79.9115
180.044	129.302	174.774		300.351	165.501	171.615		309.556	168.619	30.0439		302.812	313.692	221.915		25.6372	169.804	73.4595
163.564	135.576	164.567		307.373	150.334	154.134		302.021	156.595	26.4192		292.803	306.72	203.909		21.7195	176.977	71.0682
194.597	133.822	154.145		301.392	160.725	180.116		324.473	192.055	33.5852		300.252	324.969	218.568		30.8626	161.703	77.9217
170.983	118.933	169.772		309.481	149.539	172.517		310.539	158.923	19.5397		290.917	305.298	224.749		412.078	136.829	113.029
172.59	131.657	180.273		300.233	158.753	155.243		307.777	163.313	19.5796		303.748	334.056	220.589		412.421	139.761	106.46
181.377	128.117	158.504		304.789	154.91	155.561		317.556	156.55	32.2316		325.744	334.295	215.605		409.198	166.145	112.39
168.064	123.973	153.841		300.533	154.08	180.329		319.31	165.079	32.2274		344.577	345.158	215.823		402.291	139.879	89.0341
170.96	127.408	180.69		303.522	167.054	180.979		316.663	169.267	26.2856		305.124	309.24	211.204		413.311	135.533	89.4826
164.072	120.344	158.538		299.266	192.13	158.042		314.652	172.594	32.1805		339.41	347.648	216.057		405.715	137.622	106.531
194.733	125.993	158.817		305.722	164.818	174.596		325.88	180.694	26.7		332.787	368.982	215.714		390.311	137.483	127.193
177.088	120.281	147.269		301.549	168.328	175.681		308.427	166.259	34.5668		337.482	368.036	210.664		396.835	145.074	77.9663
163.761	134.073	170.18		303.614	191.286	174.882		298.735	203.75	26.7052		315.347	338.338	214.291		411.819	140.166	78.9226
181.073	133.311	147.426		302.175	157.253	175.681		301.464	176.349	33.8851		328.837	369.694	210.52		405.549	152.108	106.942
162.966	132.307	189.336		309.887	185.269	175.702		300.118	157.461	35.0628		300.718	303.415	208.252		399.749	152.91	102.997
173.859	125.154	175.608		316.765	193.108	182.619		299.289	161.96	23.5595		314.104	329.522	217.521		412.886	161.892	98.8691
167.766	119.012	149.456		303.803	194.18	165.627		326.529	170.577	26.9572		354.66	345.675	201.779		403.885	175.456	113.302
169.401	122.893	159.079		303.227	194.097	177.34		326.009	187.982	26.9511		334.767	344.925	225.047		412.491	142.117	90.4962
185.694	135.239	159.065		304.211	170.589	169.123		300.993	169.243	20.6361		325.307	367.983	207.67		411.444	173.443	107.667
165.666	131	175.112		309.752	153.318	178.583		302.159	175.381	20.5902		345.264	355.316	201.939		405.16	141.749	99.5297
188.029	124.927	159.69		307.333	161.427	178.885		301.171	167.804	32.9502		317.248	367.123	211.019		401.741	138.073	130.391
190.768	122.737	147.856		318.819	195.951	178.502		304.806	168.345	24.5426		353.828	349.736	204.833		407.573	161.067	99.4563
175.612	127.466	154.871		308.367	302.812	191.636		303.839	202.073	29.0249		334.543	336.648	220.717		413.931	162.913	103.44
161.807	124.451	148.59		356.127	322.644	214.767		317.588	161.579	25.0875		298.543	303.697	201.741		408.59	157.218	116.026
192.059	129.778	154.088		361.227	330.64	213.519		310.708	167.304	21.5084		324.4	366.607	216.482		410.761	134.622	108.581
191.605	131.249	162.463		366.389	335.848	199.573		318.15	154.243	25.567		319.434	336.268	219.318		406.651	159.937	81.9997
179.382	132.103	170.21		353.7	347.924	221.086		305.686	173.643	29.5104		336.675	344.017	211.89		411.068	152.048	100.295
180.83	118.584	166.375		342.689	350.4	193.018		303.662	189.719	33.6396		351.887	352.675	212.068		390.105	134.023	93.735
174.881	134.171	183.28		360.048	348.577	217.028		314.544	149.649	29.8812		293.99	331.486	225.513		407.286	151.059	119.647
168.329	117.828	145.246		344.514	329.522	211.542		323.811	154.092	29.8209		305.739	302.718	208.74		396.845	144.759	94.7351
183.243	120.954	162.584		323.65	296.807	207.036		311.414	165.179	25.6449		297.389	310.425	205.272		410.99	138.775	120.082
184.183	118.937	145.122		356.884	313.044	218.377		298.393	173.451	26.1493		316.004	305.844	227.269		400.656	138.346	95.3562
177.073	135.842	150.203		309.824	300.528	200.679		150.284	242.501	215.266		295.937	332.802	216.207		407.487	168.512	104.762
175.475	119.337	165.926		340.674	317.052	215.132		152.84	225.303	210.961		295.172	302.325	194.95		407.469	136.193	95.0993
171.131	123.044	165.99		346.044	351.429	200.784		166.572	240.596	202.218		318.366	330.239	223.584		405.188	144.55	105.118
183.385	133.817	162.58		299.923	295.789	194.223		152.126	237.183	216.619		298.904	332.393	221.399		406.8	166.248	100.764
168.776	117.213	160.032		309.476	302.096	207.819		168.716	231.707	207.427		346.496	353.529	225.74		393.295	175.444	100.592
170.781	136.351	166.102		333.947	304.379	212.555		156.785	234.49	217.038		334.549	366.271	225.021		400.602	139.688	101.673
180.014	130.594	151.562		323.838	309.562	218.902		153.756	235.027	211.676		294.087	328.249	212.384		412.55	180.592	108.734
167.105	129.332	183.979		339.351	328.618	215.56		153.853	252.257	203.676		347.196	347.797	203.039		405.595	142.763	84.2051
165.098	132.469	156.041		311.622	305.797	196.129		151.083	240.89	207.808		350.233	347.788	219.652		405.519	167.523	95.4477
176.595	127.452	171.27		361.969	326.149	208.529		160.521	218.987	217.545		151.042	247.83	198.119		402.141	145.511	121.377
328.779	297.673	50.8499		358.434	326.821	207.999		163.678	232.581	204.242		147.703	251.851	199.504		410.305	151.195	105.606
348.447	296.865	43.3696		313.341	305.356	216.672		158.733	232.865	208.026		153.241	233.492	200.836		412.44	162.924	110.061
346.942	288.342	54.3197		331.353	319.603	216.802		150.882	252.404	199.453		157.415	239.281	194.312		410.184	144.15	85.7226
324.727	297.371	45.0007		325.769	300.964	209.52		160.755	235.83	213.178		152.119	239.745	201.038		407.744	140.97	111.301
334.02	290.515	64.2026		310.647	308.534	209.512		156.011	242.075	212.633		148.731	232.229	206.596		405.108	159.98	111.455
341.252	294.258	59.0672		349.953	351.949	203.37		160.545	243.06	205.496		147.427	266.896	194.674		412.516	152.458	96.6214
352.081	284.861	59.0547		313.237	300.883	204.399		165.291	224.362	212.64		155.428	243.908	195.98		399.354	152.072	123.693
346.144	287.722	59.9185		355.897	351.015	213.163		167.807	226.2	208.442		147.117	232.064	210.238		405.362	147.945	101.687
355.183	284.22	26.2136		323.863	304.337	216.748		153.903	235.042	205.254		147.602	245.483	203.211		389.632	154.059	124.891
344.076	286.471	48.2065		331.528	301.192	209.786		156.27	230.344	213.388		148.94	240.023	203.917		30.6185	168.788	19.9178
349.15	298.208	35.067		316.252	302.352	209.836		175.761	230.132	200.377		171.022	125.344	162.692		24.9567	169.4	20.0551
350.52	292.21	58.4602		363.865	319.218	218.296		160.06	236.707	200.609		152.396	141.702	187.814		28.6489	175.3	20.3631
337.818	294.653	42.6702		361.534	312.152	220.147		167.199	237.781	205.511		146.95	129.272	162.401		16.2449	159.138	30.5884
347.353	292.456	48.7842		345.568	308.563	217.285		161.807	214.173	219.061		162.084	130.181	163.015		19.5035	171.222	20.7989
335.878	283.289	45.6962		310.324	302.223	213.7		171.521	225.969	205.671		153.684	122.054	164.071		12.1996	165.897	37.9854
322.087	301.472	50.5622		355.513	352.675	205.196		156.372	224.019	220.004		147.867	135.607	188.124		38.3325	140.778	62.297
339.795	287.322	59.6227		361.278	353.245	205.681		154.38	229.591	209.014		161.166	141.134	167.013		30.1161	146.809	61.6138
332.83	288.714	57.0005		350.442	350.143	217.348		150.692	222.422	225.445		151.059	132.057	157.284		20.0254	182.28	46.7669
327.457	291.851	56.7629		304.906	301.014	197.513		150.577	224.438	220.28		153.796	143.995	160.509		10.7422	179.254	34.2165
355.398	287.316	29.2049		347.809	351.336	210.179		164.121	234.289	209.298		163.704	138.574	157.667		6.96194	191.352	37.8542
353.36	293.427	29.1443		311.447	297.112	191.469		155.098	229.647	219.986		161.933	135.173	178.456		12.3871	168.43	56.8335
338.868	295.036	64.0494		186.823	248.201	138.485		150.748	233.407	219.96		156.877	122.222	169.137		31.3817	142.56	37.9497
324.831	302.107	56.6816		180.916	258.448	116.876		162.57	230.402	214.139		163.885	126.584	162.606		38.6012	143.001	47.5957
347.238	292.311	40.0583		177.08	253.349	142.741		157.851	248.843	201.642		160.055	143.451	183.053		26.9348	145.044	38.1851
324.699	287.451	42.7859		179.582	247.962	142.833		163.092	228.44	209.893		180.747	143.032	167.103		40.8829	156.341	38.7273
345.804	303.235	34.6207		191.156	249.86	134.031		151.038	217.576	227.82		160.211	121.708	163.683		34.8962	166.177	27.5713
334.224	294.458	59.6672		192.112	245.018	133.887		158.449	224.196	210.858		169.764	140.957	161.274		23.388	172.258	57.7382
326.198	296.382	58.7049		177.445	258.517	123.564		154.144	246.7	206.419		170.33	141.695	174.449		12.503	180.258	26.7561
352.323	285.84	64.6686		157.373	259.071	127.916		159.958	217.441	222.074		148.518	143.106	174.216		26.8663	192.907	26.778
323.751	287.666	61.3479		166.397	257.641	134.877		204.178	248.225	59.794		159.691	138.476	183.256		34.7639	169.98	21.8534
334.429	299.08	42.7152		184.316	238.395	143.652		212.558	231.639	48.667		152.836	127.718	181.035		24.1941	190.127	41.2118
329.968	292.673	43.2318		187.492	238.003	139.77		203.622	262.671	60.8965		167.652	129.606	165.043		20.8039	170.769	31.1233
331.154	284.889	54.0133		152.154	254.183	129.215		191.704	222.704	69.375		151.7	132.514	174.874		22.1079	184.89	22.2656
321.978	289.046	52.6502		183.272	244.139	139.9		180.651	237.955	69.3707		178.75	138.442	167.622		5.29153	186.414	34.7683
353.66	292.705	51.4896		198.182	222.71	134.969		205.717	243.091	74.1227		156.028	133.783	186.205		15.0467	186.159	22.2566
350.634	288.466	43.7738		171.641	257.319	140.067		189.483	241.491	72.1995		155.571	136.881	180.441		41.5123	140.197	42.2194
334.177	283.193	64.0411		202.684	251.071	124.534		173.228	242.257	65.9288		158.711	135.542	165.667		33.9323	163.214	22.6291
326.705	288.484	53.1052		158.653	253.749	135.235		202.509	255.462	72.5429		152.014	131.069	184.233		38.6599	182.085	61.8737
354.921	291.141	46.0692		166.628	257.509	123.956		208.452	256.954	72.7217		169.562	144.152	179.252		9.45388	172.655	48.819
324.632	296.743	65.1491		166.104	254.307	144.747		198.279	261.752	69.4601		152.202	126.1	170.197		30.8898	171.229	27.4918
343.102	295.257	45.6707		191.534	254.737	130.315		172.759	258.093	71.3282		159.178	146.386	176.543		27.0609	186.597	47.9339
334.43	299.978	64.7412		163.818	258.114	144.711		202.591	263.678	73.7586		149.338	138.498	161.311		39.8526	136.602	58.1342
346.225	294.494	53.3129		163.935	249.01	135.832		196.24	257.025	56.3013		167.708	139.701	177.631		42.5701	154.298	42.9682
347.57	292.298	32.8039		184.116	243.336	145.1		203.52	224.474	70.2209		155.561	142.793	177.904		35.9654	184.359	22.5269
323.103	290.181	47.8947		171.808	260.221	131.342		218.785	226.273	70.1163		164.353	137.73	172.248		38.9789	161.35	22.9248
346.055	289.607	65.8933		157.472	250.319	140.62		190.507	259.996	60.3539		155.52	145.975	175.245		14.8753	189.09	38.3817
327.757	293.35	62.2075		163.369	253.49	131.033		202.209	225.471	43.0292		168.836	134.91	163.045		32.8832	191.565	59.1711
353.48	286.381	49.7861		193.263	269.75	114.424		209.029	232.294	67.2217		154.985	124.977	176.166		29.5496	167.361	47.938
331.316	290.456	33.3424		183.335	254.162	136.021		215.753	221.484	43.1769		152.714	134.538	167.935		41.1346	145.612	58.679
338.611	286.498	53.5584		170.187	261.199	119.46		184.525	233.857	72.766		159.535	130.789	179.91		39.1637	153.376	58.5652
336.213	293.942	49.3897		158.6	260.018	145.599		186.662	260.757	70.5982		158.823	140.105	175.489		14.862	192.814	62.663
340.307	292.589	49.854		172.077	256.609	126.03		196.887	230.065	74.7057		162.94	140.852	178.773		34.2728	152.279	62.8611
333.855	288.558	51.8057		176.982	254.141	131.657		218.299	264.651	44.9532		160.679	125.28	168.192		41.5167	166.104	23.2371
353.282	294.909	59.9062		208.383	269.826	115.252		215.31	258.313	67.4752		165.583	142.997	170.302		37.0474	155.624	63.1976
351.878	298.072	38.8987		208.12	255.287	120.818		198.656	219.189	65.0842		177.451	126.345	155.833		36.0579	191.601	27.1834
353.24	297.138	45.9558		195.132	248.472	131.811		218.253	248.098	50.7653		174.767	144.653	175.783		35.4904	163.066	58.9847
321.614	294.771	57.0518		210.877	229.917	126.288		217.87	257.52	45.1997		173.72	124.836	157.926		12.339	180.381	58.9422
353.341	283.526	33.8275		152.621	264.872	141.193		175.801	222.349	61.8114		151.131	120.06	170.578		21.6956	184.091	31.9289
344.338	293.879	36.7466		188.379	260.337	120.761		193.72	227.848	69.8884		151.884	141.492	155.988		30.9988	148.4	50.4629
342.946	286.277	41.6109		195.569	251.246	126.692		216.579	214.254	57.5878		153.8	127.749	166.18		31.1222	189.394	63.5054
327.083	293.414	39.187		161.557	246.716	141.706		202.953	235.235	58.2094		152.157	133.543	162.057		32.6148	163.98	52.8027
353.407	292.085	41.4924		189.757	251.823	138.581		196.29	226.962	46.0139		161.322	134.56	162.65		42.792	155.511	63.8839
332.372	288.614	46.6967		191.729	242.575	138.381		208.42	232.884	73.1243		154.741	128.355	157.851		37.7761	138.247	52.8231
351.239	291.262	35.1039		196.738	264.446	116.578		187.434	242.08	67.8492		153.721	141.007	166.49		11.6193	184.071	35.4861
343.279	290.89	43.3207		204.652	264.533	116.242		164.22	246.747	67.4338		158.869	129.666	171.061		31.5302	181.137	60.2488
173.484	113.928	136.579		181.486	268.24	116.308		165.818	255.101	51.9868		156.655	124.636	160.541		24.8219	174.619	28.3768
162.963	113.465	120.013		182.021	257.304	121.761		199.142	225.37	53.3213		149.574	140.477	180.23		37.7484	172.82	24.4343
177.824	109.154	133.781		183.477	255.144	128.76		193.162	245.806	44.9565		151.212	126.044	160.239		35.6099	144.703	32.926
182.895	120.399	93.7499		200.709	258.685	116.568		178.186	255.238	72.9797		164.076	133.194	160.034		29.4564	154.291	32.8226
195.151	119.944	101.269		167.425	262.366	127.653		209.407	265.206	64.9937		148.382	134.727	168.144		33.2794	141.247	59.7693
176.833	136.459	97.8781		190.526	254.868	122.542		154.236	217.437	62.5224		147.483	124.022	166.762		10.0592	174.855	44.4142
162.91	125.909	93.1536		301.611	296.629	133.191		169.007	246.983	74.7901		317.531	304.175	63.3255		27.726	180.519	53.777
166.239	121.128	136.101		314.04	299.584	130.234		209.765	213.983	53.7295		353.262	305.035	68.649		32.4613	150.147	40.1102
187.592	133.41	85.2694		344.456	305.125	127.028		204.604	236.169	63.3704		338.221	312.397	70.409		31.3818	172.016	60.5663
166.313	134.699	111.136		353.992	348.089	122.366		216.069	273.842	73.2406		330.124	307.951	72.1261		35.7577	139.994	44.2076
168.463	116.395	123.697		352.479	315.942	119.192		216.221	229.183	72.4458		332.461	316.65	69.4998		21.4227	177.257	54.1115
178.81	127.063	133.758		337.501	297.526	121.845		173.388	248.367	65.8612		351.611	309.29	65.081		26.4987	159.227	32.8795
181.367	134.77	86.0075		359.101	309.291	138.323		171.427	254.144	57.6625		302.069	308.287	62.2241		10.0056	169.947	33.0703
173.166	104.439	129.157		344.018	313.942	133.491		212.191	229.786	63.4833		344.092	311.847	63.0675		33.959	160.726	44.8002
163.538	136.055	123.372		348.431	314.393	126.919		207.14	272.618	64.6095		316.983	306.692	53.8437		39.8052	192.915	24.7648
177.082	112.174	121.555		315.392	302.096	113.709		191.814	239.676	59.1752		304.122	303.919	66.9855		40.8119	144.001	36.1164
182.794	128.985	121.4		307.856	301.094	133.114		202.977	217.787	71.2027		355.837	304.514	63.4555		31.7156	156.777	24.8653
180.122	113.025	136.928		346.785	308.928	128.301		202.076	260.312	57.7704		338.261	304.475	63.2541		9.78072	167.609	44.6154
181.126	136.432	131.657		329.271	329.379	142.192		207.803	243.852	54.5886		308.717	307.953	67.0262		37.827	143.951	40.577
172.091	122.13	133.367		335.756	314.952	130.835		199.121	249.252	55.0261		321.575	303.841	54.6641		18.3162	173.641	37.6171
183.652	136.695	106.596		342.713	326.776	130.647		188.335	234.708	66.0137		297.431	303.963	69.3206		6.36148	179.121	36.7062
195.777	102.112	74.5967		309.66	298.171	117.004		207.348	247.143	71.4501		323.645	317.816	71.211		28.1598	186.576	25.0718
177.033	124.589	112.22		358.33	301.694	116.808		199.331	238.575	66.4938		355.813	312.741	67.294		18.4415	164.008	64.1393
192	123.083	129.767		365.421	297.908	128.289		209.493	235.84	59.2589		313.631	302.834	73.0821		22.9686	171.878	44.8804
195.142	115.446	117.199		341.679	328.044	123.97		216.093	261.094	54.8023		350.305	302.697	72.7481		15.0809	182.127	33.3258
174.474	120.034	131.003		345.322	319.101	135.837		214.699	264.51	71.589		298.823	311.188	62.7935		20.2756	186.701	40.4006
184.07	134.878	75.4921		356.509	301.284	122.304		205.521	267.958	71.3091		342.523	307.21	68.2028		27.2512	168.1	64.44
168.564	134.366	107.517		354.939	329.084	117.221		211.107	225.804	68.5271		342.467	307.848	73.3902		40.7765	166.119	30.139
192.58	132.458	75.2396		338.97	324.473	136.499		218.644	226.339	63.8678		348.613	318.809	67.5821		39.5806	154.939	24.9963
179.131	117.76	134.087		304.034	305.346	130.655		204.137	270.801	47.2243		348.296	304.62	65.5783		29.8538	168.712	54.8891
188.014	118.074	95.799		355.96	307.974	120.138		217.022	253.88	59.4045		345.801	305.321	59.5639		16.894	172.586	60.907
167.637	108.472	122.73		342.01	305.925	131.934		205.766	250.246	63.1205		315.848	308.709	67.4492		20.2114	179.396	25.3774
166.398	122.013	95.655		352.255	298.409	117.714		199.59	252.278	63.5908		318.848	319.626	67.8295		16.2213	180.741	37.6615
169.209	126.66	95.8155		335.675	304.95	124.2		190.92	234.393	74.847		332.149	303.667	69.6794		36.1512	157.766	33.633
163.185	127.948	117.65		301.836	304.836	124.361		218.6	264.984	59.2233		315.252	314.156	64.2945		25.3611	192.625	45.2732
184.061	126.401	130.13		342.236	308.423	122.179		176.896	256.679	63.5707		338.161	303.584	71.7367		16.4531	162.186	40.4598
168.649	122.464	108.013		343.847	341.195	115.449		187.704	249.457	47.9068		356.511	308.125	69.6309		27.1535	164.313	61.2513
190.5	136.386	108.804		335.873	311.005	122.698		216.726	233.314	60.1337		347.965	308.823	70.2586		35.9594	168.224	60.7305
182.837	133.736	99.6518		355.092	324.552	120.153		185.183	254.022	54.1949		320.577	309.911	72.0294		41.9066	139.627	36.9215
195.419	133.145	104.06		332.673	324.081	128.235		210.974	269.663	71.7774		316.561	311.845	71.3571		27.6168	176.091	61.1218
172.07	103.761	122.806		362.383	301.874	115.297		195.82	250.209	58.9489		305.121	169.441	235.225		24.1996	186.956	56.1916
180.079	130.095	137.591		367.822	322.109	137.245		181.36	241.141	66.5137		328.445	162.248	247.159		31.5275	149.668	33.9999
167.725	133.45	95.9382		350.006	302.506	120.269		212.256	267.718	54.8516		311.965	163.908	241.884		12.1698	184.131	61.3573
186.987	124.002	124.936		346.454	331.493	124.604		162.445	225.575	68.7598		334.996	174.855	246.528		15.9277	171.426	46.5258
182.967	124.33	114.959		349.402	332.517	136.798		205.646	248.612	47.42		352.027	205.324	235.215		23.3061	156.833	29.9794
191.681	134.033	95.7143		355.278	318.629	128.363		199.586	236.596	72.1393		353.303	166.097	241.693		38.6419	160.352	61.2776
182.513	130.179	114.969		329.975	314.456	115.371		206.526	238.899	69.2292		336.95	180.448	246.863		38.2852	141.845	55.8723
189.121	135.682	103.997		300.952	306.765	117.945		186.363	258.865	64.2423		325.553	160.839	254.545		11.7246	173.839	55.8583
190.286	119.211	119.269		346.535	334.274	143.794		216.36	234.858	74.0519		297.535	157.225	232.34		31.7308	180.939	26.0553
185.392	120.497	130.759		332.063	301.447	120.528		203.848	252.136	68.7172		354.621	203.325	241.921		39.6057	192.049	30.098
166.839	133.399	100.782		308.422	305.942	115.634		184.804	244.105	73.7632		325.248	166.165	232.371		14.8063	179.8	46.7009
180.879	115	119.076		350.233	339.172	134.231		205.971	230.164	56.2031		340.846	165.604	253.277		26.8457	148.181	34.1428
162.46	124.253	130.113		344.073	315.764	122.951		219.111	220.816	66.576		354.266	168.205	247.25		22.1341	163.484	56.0081
169.183	113.937	132.445		305.332	308.07	144.541		214.268	243.955	56.0591		337.615	169.111	261.417		21.6859	192.512	26.0885
182.083	117.335	128.283		347.039	340.846	125.293		208.711	215.703	72.1926		352.923	172.265	235.44		22.5357	163.163	37.5233
174.597	127.397	115.471		362.304	315.479	137.396		214.351	239.585	64.3439		304.209	180.374	241.78		27.6554	160.551	40.9322
164.313	132.384	128.263		342.184	332.145	131.558		199.965	242.578	64.4204		320.707	159.31	232.736		40.8002	157.872	34.4168
168.436	136.442	130.705		340.537	303.72	128.845		196.999	259.371	59.3677		296.641	179.998	235.516		13.4513	177.736	41.2452
189.192	125.762	96.7327		353.535	349.328	134.994		169.388	252.455	71.0071		301.066	184.238	238.196		12.5024	162.013	34.3085
179.6	132.393	105.107		317.843	316.778	128.982		216.085	266.926	66.8832		333.984	175.896	256.503		7.43928	177.425	30.6842
176.651	109.917	128.472		304.254	299.929	118.108		183.545	131.591	89.8919		325.789	160.794	232.94		200.736	99.8982	112.798
171.332	128.456	110.253		352.682	311.107	123.647		174.195	131.882	89.7021		331.47	163.485	232.86		222.916	106.641	108.629
171.574	128.464	138.033		350.669	319.641	131.896		164.563	129.217	100.484		330.947	165.457	248.327		211.08	101.533	130.926
162.818	114.459	131.364		361.76	304.426	118.764		174.852	132.712	101.91		292.389	175.187	239.06		227.149	126.215	104.221
180.265	124.079	123.054		304.073	315.984	144.939		176.275	122.118	96.375		295.313	159.313	258.764		215.601	126.619	122.71
184.19	124.217	135.806		314.802	303.915	132.042		184.292	134.246	100.488		303.841	162.126	233.791		195.254	120.885	87.1181
183.508	132.123	110.072		351.982	306.042	126.808		169.843	135.708	100.411		320.885	159.956	257.29		194.737	123.142	108.893
185.302	120.91	120.087		338.763	312.34	126.865		176.413	125.66	86.5596		343.961	178.788	248.796		204.092	118.689	117.932
172.564	130.267	133.674		330.889	311.267	132.291		152.661	130.363	86.4525		342.413	184.986	238.573		225.893	120.878	113.049
195.113	129.024	93.3403		349.65	321.604	137.67		200.005	114.31	93.1524		316.149	159.601	248.922		203.673	126.578	112.625
321.859	289.519	91.1884		324.859	313.528	132.195		177.372	133.182	94.603		347.364	173.882	242.749		193.672	120.745	95.1089
329.519	291.873	90.5176		310.915	307.563	135.107		171.099	120.308	88.3172		314.955	167.31	233.319		188.46	106.717	87.9363
353.161	313.738	128.402		339.659	318.095	135.3		196.984	114.463	110.273		353.508	159.597	248.723		202.369	126.299	131.18
338.833	292.3	122.803		361.25	331.283	145.837		194.606	118.537	96.8281		336.644	167.677	233.419		201.689	124.279	87.2876
344.879	300.514	120.842		317.031	298.648	118.871		184.616	133.8	104.779		308.753	191.743	233.29		203.919	120.57	112.697
342.084	297.834	90.8874		347.001	326.636	129.76		179.24	96.5564	86.4414		325.126	180.138	235.998		201.614	117.096	100.819
328.17	283.804	107.149		351.805	323.017	123.317		174.35	87.8921	93.2017		325.325	178.197	243.032		191.811	124.86	88.0877
334.559	290.281	135.44		306.456	310.9	138.394		212.34	121.23	104.07		354.381	157.436	254.245		210.864	111.972	95.6461
350.419	298.158	76.191		309.215	305.302	129.979		171.456	103.569	111.544		298.852	174.871	243.395		188.79	112.23	100.92
344.231	292.39	94.603		347.44	312.86	119.12		170.067	114.978	105.608		343.353	181.194	243.286		202.398	119.477	95.4942
339.469	299.891	129.401		348.115	325.346	121.568		166.977	90.9415	84.5273		347.654	204.371	239.736		215.838	118.915	131.389
335.806	286.613	91.1863		336.773	328.264	141.235		197.163	123.077	105.437		331.654	171.006	243.552		189.997	125.393	118.088
344.758	312.14	129.148		312.296	311.838	130.124		150.836	131.715	96.9933		326.651	164.99	239.707		207.572	113.542	119.928
335.376	291.88	90.9808		360.874	298.682	121.663		171.73	133.379	104.468		333.799	166.757	239.567		200.465	104.007	131.371
349.997	302.706	116.656		345.603	157.973	90.777		201.261	103.342	107.984		294.762	169.883	234.291		205.862	122.773	118.535
347.973	297.888	113.151		360.721	171.336	98.0145		159.945	130.802	86.7799		345.857	166.963	262.645		219.28	123.33	124.205
335.121	293.063	99.9141		359.729	176.166	102.398		165.495	97.0847	81.7526		296.011	159.507	254.764		201.122	113.545	118.832
345.953	322.628	137.199		324.929	151.936	93.4158		180.198	134.741	101.943		314.922	158.692	236.602		189.476	104.702	101.823
328.598	294.711	83.8918		361.525	191.709	102.641		171.975	109.242	102.953		318.815	158.676	240.153		201.695	112.664	101.526
354.582	323.894	120.752		359.411	152.254	94.2913		197.624	116.421	104.151		322.864	160.51	245.142		195.915	115.576	105.517
337.823	296.63	135.788		355.71	159.027	84.9123		204.315	117.905	95.1488		310.769	162.968	234.691		187.739	123.755	80.2528
341.941	310.816	135.661		341.35	150.56	82.1905		196.069	112.881	82.9762		319.68	164.111	234.186		204.589	113.513	96.2321
347.257	295.92	117.875		332.175	150.373	79.0769		154.425	108.907	111.015		352.232	175.217	249.973		207.264	117.945	96.0744
322.73	287.077	74.2632		352.987	163.881	79.3973		193.218	116.34	88.7181		355.891	179.026	239.83		201.286	125.495	105.799
351.937	298.964	108.181		354.608	157.909	91.3438		158.336	127.935	112.558		297.571	158.542	244.583		194.799	101.322	101.946
326.837	287.988	80.3003		361.799	180.212	82.9053		159.771	124.037	86.5137		354.067	177.509	234.246		188.217	125.685	105.547
352.358	285.273	74.059		361.707	158.862	95.7831		164.606	124.822	106.087		297.795	160.184	237.089		220.126	110.573	113.519
326.544	284.95	84.0999		357.981	190.644	99.6116		212.461	113.363	85.3693		291.187	157.112	258.767		203.683	124.546	96.2253
323.186	296.541	78.4312		331.659	154.149	91.964		159.675	123.171	101.882		304.663	159.517	264.347		212.773	118.994	125.351
344.217	294.127	108.601		336.747	149.931	82.6863		177.421	132.457	83.3506		336.961	171.446	239.947		187.803	114.937	118.959
355.011	287.416	83.3449		358.681	177.838	77.9112		181.945	130.229	101.086		304.289	157.027	251.633		189.792	118.1	81.4386
346.551	298.171	91.9156		354.816	180.633	107.608		194.951	105.117	91.5072		308.957	176.329	234.54		197.435	111.145	105.267
344.712	299.751	83.7218		326.415	150.877	78.1797		153.051	119.074	108.092		333.73	162.053	264.298		215.001	122.789	119.542
334.018	283.141	75.1546		362.35	178.438	96.2279		187.642	104.995	91.8286		346.103	182.527	237.064		191.838	124.994	101.856
332.506	289.342	77.8112		336.286	154.257	85.8858		175.445	114.657	99.3437		316.062	176.92	234.604		195.076	115.589	110.521
349.714	288.75	87.3073		365.747	154.668	91.9019		182.764	122.936	92.05		305.625	182.43	236.808		203.566	120.379	105.516
352.009	316.54	136.587		349.932	163.54	89.8217		162.97	111.621	88.1775		341.529	171.139	264.486		199.117	119.287	109.694
339.827	325.247	129.763		362.888	152.55	100.668		158.81	122.694	112.663		336.236	172.976	252.074		208.408	122.486	106.291
334.607	292.239	80.8836		364.757	162.876	92.112		188.753	110.169	101.711		304.569	162.982	240.818		213.88	127.258	102.478
353.923	298.882	114.613		364.707	183.569	92.3869		171.865	86.6035	103.309		337.699	166.053	245.153		207.791	123.978	110.339
327.102	286.727	88.8866		356.543	151.41	89.5537		195.197	105.392	85.9067		352.083	165.831	252.184		189.679	126.077	110.375
346.625	313.099	136.143		367.093	159.573	107.942		202.941	99.6913	94.846		325.647	158.608	259.219		199.76	107.823	102.304
327.754	292.887	78.4627		367.455	190.888	100.172		155.694	132.267	94.945		338.246	176.567	245.265		202.505	98.7777	132.004
330.911	294.975	74.9171		364.285	157.442	101.126		167.278	115.219	84.7473		342.451	168.415	240.644		189.552	118.839	71.9917
336.625	288.198	96.6334		360.427	167.51	90.72		186.146	97.9824	113.177		312.582	153.264	264.857		195.631	112.31	89.6546
334.434	289.645	131.339		357.495	186.147	105.718		177.914	125.97	92.5706		310.242	166.754	237.676		217.702	113.629	96.7333
332.583	289.114	84.9155		367.126	170.437	90.2592		192.545	111.769	106.37		351.894	170.058	256.088		192.462	127.531	82.1496
321.697	286.053	79.097		353.685	154.486	84.0108		172.713	123.049	102.063		340.498	173.603	255.859		217.859	123.414	114.666
339.227	291.027	115.962		364.369	187.884	105.816		176.536	128.277	101.556		315.859	179.112	237.732		205.253	117.768	110.09
322.824	292.598	74.9786		346.331	161.475	80.7358		205.196	109.954	87.8536		331.421	165.912	234.967		227.051	115.772	126.156
355.44	286.15	89.1679		328.427	151.844	87.2188		187.641	130.217	95.7348		351.246	179.681	240.394		206.375	112.913	90.4305
348.012	299.673	97.5184		358.067	194.42	106.101		196.527	97.1188	83.5182		322.063	171.159	252.988		189.852	121.584	90.9554
340.634	286.881	104.566		339.692	158.525	84.2313		151.012	100.858	104.338		295.448	183.212	241.003		189.04	122.473	97.0585
352.7	320.836	133.267		355.846	172.11	87.2432		172.165	115.704	94.3596		328.36	160.549	259.737		196.68	120.699	102.894
338.199	295.658	79.1078		351.274	152.284	90.5111		189.602	118.497	94.2981		318.506	164.121	245.72		191.364	115.227	90.8759
333.359	288.856	104.305		167.08	112.867	78.6339		178.697	113.155	83.2457		301.419	159.664	256.851		226.641	121.787	103.268
347.933	301.434	78.738		155.74	127.711	78.661		195.486	111.559	100.241		338.095	162.035	259.665		214.059	102.112	110.868
344.149	284.757	116.137		161.679	106.25	104.927		207.445	116.989	113.557		312.043	171.7	235.039		213.239	123.978	84.3333
345.537	307.772	124.451		174.437	96.3233	105.397		152.954	122.731	99.894		322.881	155.16	237.827		199.75	108.716	91.0028
355.732	293.761	115.986		212.52	116.402	104.865		171.625	126.849	92.2859		316.772	161.39	253.097		206.671	126.263	84.9202
334.145	285.14	133.84		175.706	103.92	106.263		196.196	109.935	89.9433		301.377	173.334	235.239		216.737	114.432	123.013
341.645	291.476	111.805		167.171	103.839	84.2141		190.734	97.8566	87.8062		353.007	179.113	245.552		194	108.582	103.437
335.802	315.752	138.086		191.56	117.839	105.63		160.153	110.44	101.984		346.967	167.525	256.234		205.824	126.994	74.8286
337.827	285.313	81.798		169.414	89.1988	105.289		173.457	104.663	83.2665		317.711	154.812	245.977		222.608	122.241	115.428
353.333	286.075	112.049		182.635	95.0169	84.3817		185.815	112.041	88.5106		329.695	162.168	237.484		200.593	125.174	116.161
350.508	292.832	111.967		211.485	123.476	93.5044		210.499	117.357	100.563		343.648	179.701	234.789		205.302	125.301	127.91
330.501	282.869	79.758		179.35	118.248	79.2657		191.4	122.5	83.8472		347.298	171.909	259.802		199.303	120.832	121.302
345.379	289.861	116.238		200.842	99.3371	85.2261		318.49	162.084	246.619		346.708	173.503	252.694		207.786	117.202	85.6319
330.505	286.842	98.7178		170.835	127.676	79.2547		366.688	177.607	250.952		338.707	177.235	237.487		195.773	120.836	75.0953
352.586	309.093	120.671		157.232	99.691	106.759		317.794	189.55	262.506		351.94	154.617	260.547		200.913	101.79	102.9
342.675	304.407	126.271		160.789	98.8878	85.1872		318.806	168.333	267.364		310.47	160.153	253.813		196.738	112.409	121.572
342.642	291.721	119.942		157.44	123.14	85.4685		326.946	165.001	238.135		299.694	160.471	252.718		220.336	116.85	111.76
19.4384	174.093	258.506		205.162	123.576	105.854		339.552	160.13	246.772		343.999	162.137	260.331		221.74	118.594	129.74
25.1334	182.524	264.204		162.828	139.782	85.2644		337.635	162.195	257.621		309.818	160.285	261.448		191.875	125.451	130.047
16.6493	177.764	243.37		202.516	108.043	85.7418		345.451	167.191	242.396		335.854	166.685	253.048		214.13	126.133	107.987
20.0042	168.585	237.192		167.811	133.487	79.6481		363.401	181.228	237.897		39.5623	188.409	290.275		188.681	119.531	86.9875
27.0782	179.568	227.623		205.988	117.713	96.1114		316.433	158.925	238.379		47.3226	187.586	289.229		223.906	114.555	98.9758
33.2908	170.93	217.888		207.513	119.098	106.675		346.343	153.627	251.467		61.8326	158.881	273.001		208.906	127.23	122.271
9.89318	206.564	252.832		213.985	115.483	97.3607		325.345	165.904	268.714		32.1953	198.516	285.565		200.446	113.553	107.796
31.9448	160.604	223.994		184.347	100.095	98.3396		331.521	150.931	238.477		23.3052	177.337	272.303		211.471	125.839	116.453
14.5732	179.692	223.186		162.522	130.292	80.5449		322.651	179.408	256.785		47.9896	220.292	271.065		191.801	114.961	107.737
16.2417	182.575	233.916		160.179	103.956	98.1015		345.881	177.007	244.423		12.6318	176.056	283.021		191.834	119.319	103.644
7.74872	192.123	233.725		152.599	102.42	98.7668		329.35	157.317	268.294		26.199	162.207	274.738		187.034	116.249	99.1866
22.2294	195.454	234.375		176.795	131.054	80.5315		341.315	150.648	243.3		55.0099	168.196	275.275		222.444	126.678	104.163
15.1875	189.951	237.482		187.428	106.672	98.3888		337.564	154.231	265.042		29.8269	178.808	291.157		190.486	125.64	93.795
34.2635	184.667	253.219		182.573	137.22	80.212		365.146	174.664	243.584		45.749	179.614	291.146		207.722	121.618	99.6956
9.84124	206.092	224.372		157.005	142.319	80.3083		330.719	161.312	254.326		20.4536	173.84	287.794		196.101	127.058	77.467
25.8814	175.411	234.478		169.558	82.8821	108.388		327.29	164.795	265.495		62.2512	191.254	279.608		193.144	116.202	86.9732
26.53	193.23	272.128		159.459	123.123	81.1086		356.142	176.593	252.753		29.9702	177.547	286.151		203.788	122.868	122.806
23.8091	168.059	224.191		176.259	122.675	80.8818		341.385	159.976	264.394		68.7594	207.768	277.89		192.175	118.171	77.1833
24.1764	173.93	224.196		156.625	108.004	88.4603		320.869	155.675	243.964		40.3959	192.042	287.8		204.363	109.835	93.9546
20.5426	170.778	253.285		204.978	99.9444	88.8797		339.886	157.91	244.416		9.5936	180.388	271.281		211.939	119.988	112.64
16.439	175.888	227.611		176.304	99.591	89.3874		338.164	162.594	238.744		68.5356	203.832	275.336		192.762	114.165	117.263
12.0561	183.616	224.132		171.954	100.894	99.1301		350.295	172.342	248.513		52.6093	157.244	284.418		191.23	114.012	103.979
6.58048	184.362	238.036		184.664	99.2444	88.8186		324.298	178.629	248.876		26.2537	169.292	289.878		192.112	116.033	123.156
12.5871	205.183	260.646		152.931	112.95	89.5955		334.006	160.423	249.102		52.675	196.419	286.072		399.25	148.61	228.725
20.417	180.666	234.618		210.232	120.082	99.6835		350.27	167.154	253.289		50.1493	163.043	284.499		387.238	163.572	253.672
9.90884	183.339	234.669		164.944	119.28	82.0124		362.598	155.379	258.236		56.3758	156.324	277.135		392.387	150.606	228.453
9.89005	182.364	260.633		176.827	136.045	81.401		349.729	169.815	239.784		63.5542	195.157	281.616		406.322	170.851	235.526
33.4879	160.772	219.361		170.257	92.6924	100.623		343.96	173.935	239.981		10.6534	165.605	277.297		410.409	136.131	215.587
35.4723	162.967	246.017		210.937	124.523	82.5318		356.051	159.287	256.949		14.5652	175.903	289.551		413.078	155.576	228.446
19.116	173.919	235.219		169.519	103.98	102.619		322.485	163.771	265.09		26.6357	210.539	274.287		379.063	136.25	253.428
10.8052	186.323	228.389		210.409	111.415	102.122		337.913	148.794	249.011		28.9023	189.531	293.494		390.935	175.174	245.187
11.1825	191.631	228.634		202.319	101.215	77.2747		357.209	154.112	261.413		66.516	212.327	271.311		406.205	156.61	228.753
29.0422	175.042	246.875		168.836	138.905	81.8278		350.472	148.185	253.706		11.2261	164.428	283.022		401.202	138.307	234.094
27.2039	193.794	220.265		173.266	143.366	81.4037		331.599	177.232	245.968		61.4017	186.677	277.435		379.919	168.2	230.167
24.8141	182.248	246.611		166.095	138.483	76.7278		352.081	162.693	257.155		35.1557	191.818	277.076		412.645	172.369	230.377
30.2273	204.265	267.513		153.863	107.767	102.904		357.379	180.073	245.253		53.1999	214.758	272.205		378.534	185.597	230.213
26.4441	199.357	253.9		205.312	104.047	82.7596		327.682	145.478	239.97		31.1357	172.072	294.326		407.051	136.753	243.809
24.9374	183.607	234.707		151.623	115.951	91.6672		327.727	147.535	262.092		46.7898	157.568	286.477		408.43	175.904	228.847
7.15677	203.391	260.899		206.106	114.153	102.566		319.832	169.061	258.61		27.9739	186.658	273.084		384.105	158.322	234.692
15.778	172.227	246.705		217.849	132.562	77.5476		360.949	153.578	266.778		52.4697	156.649	278.58		389.856	143.992	239.005
13.4494	189.065	224.793		210.876	124.205	102.599		344.434	180.155	240.658		66.1983	195.751	277.265		394.264	156.229	243.248
24.1184	193.659	224.915		188.816	106.402	91.8986		350.624	164.18	249.426		53.8375	203.903	279.64		403.347	165.475	243.718
16.2542	199.086	223.864		155.879	135.418	77.6563		330.648	144.005	267.485		56.4524	202.416	284.57		391.596	159.133	235.711
23.1749	198.195	266.769		208.352	95.6169	92.5625		331.372	177.802	241.125		19.2227	201.737	277.717		372.998	137.545	231.038
12.552	189.268	220.196		155.681	103.827	92.4293		344.592	160.062	252.364		57.6088	187.911	283.057		384.949	173.925	245.845
23.5198	164.39	234.402		201.316	92.869	77.1548		350.165	169.105	259.543		43.9187	190.583	283.005		387.9	180.973	243.483
24.637	169.068	254.169		209.722	114.426	92.1569		365.119	164.488	254.496		23.4301	172.995	294.705		372.978	155.48	226.884
31.9905	206.165	262.118		199.582	126.738	91.9846		360.593	141.978	258.302		20.7616	175.842	281.723		408.334	134.426	207.258
21.3685	173.007	239.756		214.896	130.403	102.643		347.217	177.748	250.795		45.6859	215.466	273.317		389.252	171.449	226.708
17.3407	174.856	254.421		153.341	97.2609	92.5715		321.666	163.478	270.393		58.6538	193.221	282.932		375.452	186.364	240.642
4.56611	205.202	247.775		150.886	98.9075	103.351		362.657	153.056	262.114		31.8924	191.225	281.896		385.805	135.785	234.272
20.0511	188.738	220.531		157.938	104.138	103.54		322.154	188.674	242.03		21.3412	155.544	288.243		392.848	167.69	221.23
15.2094	182.724	261.338		179.419	95.8894	78.604		339.488	157.679	255.098		13.7084	168.791	290.05		385.262	184.1	248.212
24.8502	171.336	247.781		170.994	108.693	78.6408		346.065	161.332	261.58		40.5673	194.264	278.66		401.377	178.338	226.331
11.8847	197.403	220.871		151.936	121.862	83.8597		346.037	149.173	247.527		63.0699	205.28	275.752		412.04	137.561	238.936
11.1208	195.156	225.427		175.903	97.2413	84.1396		333.69	155.433	241.679		35.7841	199.941	283.645		393.994	172.198	238.401
29.4026	159.789	235.396		151.562	114.546	173.049		321.248	162.855	241.492		44.7117	183.694	284.792		392.795	146.012	234.46
28.9651	170.236	254.496		157.252	95.0698	166.428		328.061	161.673	259.687		15.1735	168.689	280.856		399.328	164.354	245.167
36.3033	165.73	220.667		154.905	89.2749	154.55		354.47	167.748	245.932		49.1757	208.551	275.634		398.879	174.029	243.665
11.5779	181.686	229.678		171.318	108.238	162.83		331.856	163.918	260.541		18.363	201.567	271.444		381.313	183.717	238.063
17.0212	184.472	220.978		162.916	108.717	154.502		328.337	143.459	255.475		60.4742	204.465	282.691		383.349	183.866	243.82
35.71	186.796	264.346		164.073	121.289	169.928		340.95	163.727	253.238		59.1977	183.47	280.723		385.16	167.402	246.667
21.5976	190.245	230.062		159.898	99.3282	170.863		356.323	144.44	256.773		31.5221	163.299	295.261		396.271	186.074	239.372
6.77652	197.996	236.538		170.115	115.541	170.125		326.063	159.446	266.936		34.6705	197.803	273.668		387.61	158.412	254.423
17.2073	199.775	240.811		161.843	105.673	167.015		12.6979	143.117	287.633		22.7575	165.787	286.882		380.709	188.147	209.898
23.8645	186.547	225.519		164.057	112.205	166.91		20.7253	166.614	289.097		34.4976	189.472	291.531		384.867	182.482	240.013
33.3791	173.55	254.942		176.145	118.412	164.022		18.0053	153.479	289.119		46.6823	198.258	284.614		399.592	134.449	230.346
12.8251	200.137	267.768		158.218	98.8617	159.74		32.1464	145.086	305.133		21.2445	169.013	278.131		384.494	155.2	243.774
32.8805	192.64	261.905		160.929	110.683	174.4		58.3859	151.188	291.357		40.2444	198.29	284.702		378.625	134.031	229.772
11.0529	177.13	234.896		165.948	110.611	162.866		48.1978	171.597	289.792		35.1492	203.129	280.173		383.663	150.971	221.583
8.92625	179.013	241.069		160.914	112.668	156.295		21.1814	160.412	288.314		34.0029	193.567	289.87		373.436	144.167	246.599
21.0398	168.887	249.096		170.306	119.119	163.337		42.9646	198.25	279.704		31.9703	210.602	273.493		380.911	188.702	226.716
19.5237	178.388	262.334		151.362	103.249	157.02		29.289	157.715	301.741		25.1628	195.546	288.241		405.814	144.597	228.711
36.0376	178.667	262.468		164.921	116.099	159.749		29.9109	173.882	287.147		65.7899	185.886	277.482		389.604	165.015	246.911
33.8548	158.992	235.901		165.519	118.635	173.938		39.3581	177.25	283.061		60.3097	153.104	276.529		388.492	179.226	224.942
33.607	191.317	268.839		158.55	105.625	174.658		45.892	167.484	297.865		42.6747	196.15	288.786		406.657	141.997	239.561
17.457	173.152	230.931		169.49	100.32	159.99		37.5418	174.283	287.107		34.3553	217.756	273.769		388.062	136.732	241.081
16.7749	205.933	221.324		164.213	107.425	171.893		31.3512	171.536	280.541		23.9522	162.14	292.451		402.566	144.049	232.923
6.13472	197.562	262.167		161.008	117.445	167.195		25.0824	169.554	291.604		49.2219	198.832	288.183		386.356	173.358	239.271
31.7126	160.511	241.379		173.717	122.844	167.063		33.16	178.329	282.666		16.451	155.53	290.217		372.969	163.187	221.627
14.3292	173.733	236.128		173.09	130.225	171.58		70.8049	178.098	290.626		46.2433	216.207	280.007		386.081	150.836	227.761
35.3739	170.308	221.448		167.519	122.262	174.945		31.1606	189.553	280.811		27.5179	161.1	290.109		399.857	178.073	239.305
27.8235	182.527	221.543		151.629	99.7306	167.489		15.0056	146.755	285.762		64.0757	154.637	273.944		401.024	164.251	226.916
18.0278	200.007	230.154		165.472	118.536	163.907		28.347	146.184	296.131		57.1945	163.341	280.808		408.904	161.547	229.306
30.9775	172.721	226.526		178.329	122.634	160.916		45.9946	173.286	285.759		13.55	183.491	274.827		403.653	166.364	232.502
30.4668	166.218	216.453		164.199	121.002	180.207		32.6332	185.23	285.689		26.5879	190.897	273.517		396.234	162.433	229.084
27.8606	171.896	215.92		164.066	95.4712	163.877		43.7651	190.263	285.995		56.5321	198.026	282.019		387.882	185.556	217.524
31.6785	175.483	216.116		158.65	112.663	171.357		21.433	149.009	302.322		57.5395	206.3	277.406		375.397	163.014	228.708
18.8152	186.969	226.345		179.668	119.018	157.611		60.0327	203.988	277.827		65.8174	200.255	282.038		383.541	170.951	232.178
29.3272	165.872	222.456		170.376	124.385	171.378		9.25101	148.024	288.59		38.5147	195.506	273.533		381.18	178.413	230.941
17.6133	201.975	270.681		160.61	94.2871	157.989		38.3371	192.113	278.254		51.3703	193.112	280.717		379.376	185.481	246.077
23.718	193.459	255.423		153.807	102.067	175.159		65.0683	167.952	290.923		27.9999	158.439	295.935		389.139	183.897	230.706
12.121	203.262	242.034		166.383	96.4033	158.163		35.5612	168.694	290.787		49.0202	203.029	281.948		403.207	179.833	233.353
26.9785	190.528	231.618		159.855	115.856	181.175		52.7314	171.33	293.389		34.5299	207.424	275.167		397.076	182.422	232.516
19.0274	184.757	216.793		180.835	133.072	160.899		55.2041	182.397	289.726		68.7069	209.87	273.82		376.947	134.539	246.794
30.9042	164.927	250.452		181.69	127.944	158.358		55.1643	160.434	289.255		38.4532	206.372	282.084		384.464	166.353	222.5
19.9834	202.486	221.721		182.196	112.599	152.183		38.6899	169.147	287.746		64.0876	205.743	280.851		372.653	163.22	236.577
10.4203	195.543	231.851		155.276	112.435	164.274		69.7598	183.805	286.051		50.791	219.462	276.171		393.715	137.878	218.462
12.0262	175.59	241.276		164.415	114.522	175.415		55.1075	195.811	280.513		34.2423	179.476	296.376		377.353	149.742	256.653
18.5778	174.409	222.138		169.085	112.907	158.054		55.3814	144.877	293.965		56.8271	211.826	273.765		381.025	178.187	237
35.7322	168.222	217.369		180.871	139.67	163.727		39.9375	185.041	289.524		35.9085	176.22	292.414		379.749	159.212	247.164
35.634	172.142	241.795		175.527	114.662	158.625		24.1667	162.539	279.274		50.9874	164.717	277.103		391.834	189.422	229.278
11.8349	202.346	217.091		183.43	125.115	151.757		25.69	142.669	302.856		54.282	176.187	287.53		385.197	186.364	222.326
19.7786	181.095	226.774		155.432	107.065	161.217		31.4937	168.674	292.116		36.2519	158.762	289.32		384.208	175.484	218.177
19.7259	179.372	222.295		162.225	128.47	182.038		28.9693	178.083	290.83		13.0733	176.097	277.877		378.809	174.539	234.484
12.9049	174.813	251.149		176.163	108.723	158.582		66.2253	176.551	292.232		53.4891	186.958	287.079		375.635	185.88	221.949
20.9955	198.713	226.675		155.528	90.1274	161.734		61.8295	182.623	289.037		28.8756	161.269	284.619		387.256	187.247	236.885
27.2702	201.3	258.125		156.267	110.105	182.209		12.2701	161.831	285.512		10.4229	180.056	276.271		376.563	141.003	239.271
32.6735	198.191	270.985		158.547	100.208	153.182		36.0771	184.976	290.963		48.7405	192.861	287.014		386.938	143.384	227.888
31.1024	197.061	264.516		173.423	112.341	164.83		55.194	201.009	281.04		34.9383	153.005	275.697		394.828	181.476	243.949
26.9214	201.199	270.421		158.623	118.864	172.268		33.2347	178.032	293.415		9.20015	171.201	280.74		394.943	171.943	246.407
21.707	197.08	217.969		183.768	119.509	153.224		29.3362	150.936	302.183		7.61431	174.298	274.694		390.17	157.291	250.208
28.0792	166.855	243.671		152.646	96.8889	172.612		21.044	146.496	284.345		18.771	190.707	289.122		393.082	134.473	229.034
26.8767	176.873	258.189		169.307	111.078	168.678		15.2451	156.128	284.082		50.0996	183.006	282.732		397.033	137.579	236.659
12.3434	203.199	233.533		171.364	120.501	168.787		69.2414	170.051	289.495		24.1995	180.307	275.544		394.202	138.901	231.913
3.26963	201.268	252.609		170.693	104.676	159.266		46.4914	162.125	291.791		57.6953	176.593	278.442		389.481	157.587	227.584
333.666	177.528	164.177		167.222	113.176	172.951		52.5459	165.725	291.422		68.2263	180.613	275.843		379.363	181.021	218.597
342.952	144.36	201.261		173.987	289.785	57.963		53.0819	191.089	279.413		52.8381	201.494	286.898		374.29	167.505	227.059
323.656	147.392	183.208		155.789	254.552	42.9028		44.1406	168.584	287.985		28.5797	177.062	297.243		407.875	168.325	227.666
321.305	156.126	172.19		217.716	225.035	45.6286		58.6217	191.422	279.063		17.7409	169.86	271.227		373.564	140.354	250.558
325.566	172.739	182.929		184.304	222.099	54.198		43.0111	145.238	300.707		23.6016	201.028	283.726		385.331	166.379	234.058
337.173	144.676	176.761		155.352	260.894	69.0641		49.8849	197.912	279.334		45.8323	204.268	279.092		379.948	182.943	212.351
349.354	157.777	206.825		190.817	232.468	46.1694		39.6479	190.578	289.685		22.3551	198.546	274.913		382.114	177.781	242.154
349.606	156.666	201.414		210.559	258.37	50.1039		14.3003	159.501	289.835		60.9813	210.691	272.732		405.469	179.213	227.38
346.197	155.351	176.634		160.84	268.587	69.3173		59.9153	169.091	292.771		40.9878	206.641	277.973		377.356	153.134	225.341
342.016	158.168	176.927		213.135	243.326	46.496		17.1878	151.625	279.308		30.5531	203.935	282.216		382.953	135.915	257.928
333.843	151.808	147.211		183.519	229.508	54.8067		55.0379	186.484	287.638		27.6229	204.888	273.249		375.199	171.402	230.965
340.308	155.084	179.92		188.004	267.321	42.9071		33.5187	159.101	300.263		45.1595	191.5	290.91		380.281	167.653	225.073
342.536	154.201	186.071		177.724	241.483	54.1212		57.8525	166.972	296.344		30.6033	209.781	278.237		380.394	157.895	223.076
346.283	183.752	172.052		216.366	289.23	69.0811		57.8192	185.727	284.376		12.6868	162.302	288.417		376.986	178.156	244.361
341.282	183.255	176.452		155.181	225.339	43.1751		50.2523	188.905	286.119		35.8747	163.437	289.203		374.215	151.546	235.181
337.699	143.55	156.503		186.021	240.985	63.0088		63.7413	155.4	288.71		33.1168	158.179	293.318		378.248	141.955	258.53
332.571	182.721	156.456		214.925	235.078	50.0387		24.1276	151.673	291.52		13.5424	196.892	271.251		411.122	138.357	228.337
354.641	159.891	191.389		196.469	266.792	55.0945		48.0211	182.776	289.416		40.9231	164.346	289.894		376.213	189.58	244.552
337.762	146.119	148.631		171.081	263.284	54.4317		49.7043	196.475	284.461		31.2647	166.927	289.293		395.577	192.449	218.956
335.688	188.922	156.76		152.583	234.968	42.7886		22.3672	152.8	296.943		37.9754	213.895	279.431		384.625	166.756	239.87
335.732	156.486	164.886		184.629	264.846	51.2732		58.9244	157.782	294.872		51.7789	191.006	285.633		377.543	183.818	252.031
345.676	162.483	180.217		190.248	269.222	50.7808		34.179	153.838	304.257		26.7301	179.233	280.92		387.106	160.133	241.892
339.918	189.947	177.822		187.26	246.486	59.9691		61.9561	163.581	291.093		151.274	279.964	132.53		407.386	140.347	232.973
339.256	145.659	169.959		163.536	283.397	70.1803		38.7619	161.776	301.306		193.981	266.76	140.982		390.774	176.314	219.02
329.348	142.238	177.079		154.838	227.971	47.4625		27.7042	163.409	285.937		186.428	271.592	135.783		388.727	137.258	247.761
325.514	148.222	150.155		200.158	230.847	50.434		11.8453	150.528	293.318		148.46	272.324	140.723		399.013	186.299	234.771
348.489	156.189	183.499		202.644	241.614	47.0726		38.1259	176.258	294.577		157.721	280.797	118.958		376.565	154.36	247.587
326.303	157.992	170.018		206.704	230.071	43.0582		56.1385	176.153	294.768		183.548	275.92	137.108		389.466	179.247	238.291
349.074	178.308	169.691		158.885	232.919	70.1134		65.0188	164.044	286.933		184.529	276.125	128.659		389.68	157.703	259.929
343.709	160.641	186.585		172.317	251.102	51.3225		70.1532	165.571	287.29		200.923	269.409	132.55		389.917	154.124	233.687
332.152	156.309	150.716		193.345	263.05	50.9666		69.0291	190.713	282.379		199.988	290.113	119.307		385.598	167.91	228.419
328.839	148.616	181.985		211.121	280.752	47.4321		36.046	147.404	297.963		160.15	272.552	132.911		401.867	170.148	228.275
343.056	149.673	180.509		166.503	241.994	43.7689		37.7746	147.106	304.135		205.319	271.274	129.038		402.644	135.392	219.22
328.927	148.22	170.511		207.088	225.791	47.9012		39.6601	154.855	301.192		153.634	270.454	141.476		397.563	166.072	248.327
346.775	146.444	207.903		191.473	227.401	60.3868		18.9909	144.784	294.814		204.473	278.969	118.035		380.501	146.845	259.793
339.593	147.263	208.466		162.881	248.139	42.7445		50.9112	167.311	297.226		206.399	264.869	134.544		376.02	177.075	225.375
339.389	161.148	184.046		216.002	278.743	51.1997		36.4396	142.954	304.142		154.339	257.96	119.138		373.69	181.339	213.388
341.718	155.428	208.753		152.457	252.446	59.7334		65.8399	183.673	287.151		147.176	278.923	124.297		398.542	172.665	233.24
354.932	156.878	203.428		200.27	260.764	47.8272		60.6631	179.334	291.852		146.952	285.28	124.529		405.653	143.901	223.805
323.109	166.635	187.436		200.653	224.869	55.6219		62.7926	159.847	289.286		197.493	269.186	142.498		406.223	136.391	237.519
337.568	166.555	177.992		166.948	223.843	43.7351		41.7616	181.005	291.448		148.759	255.37	124.598		398.644	188.592	225.374
335.14	150.761	159.1		169.311	235.483	60.5394		41.5556	166.895	295.005		176.499	270.623	136.192		372.632	182.133	231.474
331.539	157.449	203.255		182.988	251.077	51.2106		9.15961	163.072	280.36		153.58	261.058	124.403		394.628	163.565	251.915
338.654	193.446	158.483		155.356	255.47	70.6449		27.881	166.672	278.763		208.335	232.945	138.701		399.469	169.382	223.488
354.524	154.298	184.499		211.201	234.927	55.2788		51.6105	158.574	298.351		147.91	262.872	121.957		387.116	173.592	251.872
348.352	151.488	203.227		191.165	257.31	60.5588		365.484	293.363	62.5443		156.848	262.502	124.467		378.912	155.694	237.436
331.269	158.114	192.645		179.973	283.617	60.8205		316.941	304.639	53.5774		178.927	278.246	122.762		394.981	184.696	223.42
343.108	146.594	188.779		173.497	246.868	48.0385		341.742	287.506	59.7782		177.265	281.735	119.421		380.363	168.631	241.962
329.339	149.714	177.959		194.153	249.818	48.1823		326.769	297.932	68.2637		211.535	261.214	132.282		375.591	149.103	252.169
326.348	144.088	208.157		195.889	259.767	63.9457		326.467	282.165	60.8961		193.41	227.334	146.852		386.036	150.974	261.228
330.716	156.488	173.54		201.423	231.787	55.8719		299.61	288.167	43.1741		149.157	281.934	136.585		390.192	192.02	223.265
342.929	159.777	193.777		190.052	238.715	61.7814		341.237	294.547	55.665		152.489	266.726	118.036		386.947	162.428	227.688
340.99	144.479	160.784		179.361	268.776	44.1709		321.062	301.301	66.5171		148.028	261.498	147.83		378.504	187.741	235.725
333.688	160.299	171.211		177.296	232.65	48.2719		322.308	287.996	61.0499		151.344	261.772	136.363		394.449	142.695	226.204
336.28	150.482	151.739		199.878	261.282	55.9507		333.077	288.539	42.9594		151.776	273.217	131.599		377.235	150.08	242.357
347.893	146.79	194.351		214.247	272.175	43.6539		349.927	288.407	68.4456		149.507	259.487	129.673		412.684	148.513	226.071
337.851	181.717	171.074		218.518	241.663	47.8729		317.903	297.575	50.9882		202.347	265.507	141.322		398.153	152	242.947
336.887	148.304	161.934		185.068	276.097	43.8369		353.952	285.632	62.6492		190.357	276.912	131.603		379.551	156.024	242.882
332.469	162.593	162.48		203.512	255.57	64.0875		327.001	285.515	56.5375		147.34	276.853	131.764		392.557	163.683	242.527
350.679	162.595	184.613		201.924	288.107	61.5119		331.036	291.585	69.0046		156.391	263.172	130.779		394.86	177.877	229.226
344.237	143.175	182.783		155.265	227.247	64.6859		309.523	288.26	57.3271		195.634	269.565	136.372		382.932	155.358	231.295
332.609	164.263	188.199		166.615	287.381	50.8833		299.44	300.799	68.6742		151.864	254.901	120.494		399.987	169.126	242.333
352.47	173.317	184.513		179.955	223.559	48.282		307.241	300.132	64.9365		191.27	273.742	141.678		381.137	186.56	215.57
335.377	153.044	172.109		159.054	250.317	64.5322		326.653	292.359	56.7541		148.688	267.453	125.818		381.52	153.641	253.103
329.521	161.656	167.771		199.558	246.095	43.7545		314.857	289.395	67.0887		197.777	273.407	141.511		383.649	178.179	247.877
332.921	145.977	174.123		199.246	225.666	48.1555		315.365	289.665	45.1046		171.38	282.834	129.981		394.966	175.665	223.959
339.632	158.381	167.323		167.625	289.397	56.6454		305.953	298.546	54.4041		210.469	273.546	125.784		377.388	144.793	263.245
346.869	174.259	167.757		186.867	243.969	52.7715		314.61	296.974	66.9194		190.625	262.08	149.094		388.525	177.381	232.6
329.778	152.83	189.65		161.367	222.722	39.6309		354.946	309.758	64.7396		198.228	261.52	141.588		404.025	183.726	223.399
339.969	149.381	194.991		199.355	251.331	44.0958		303.082	281.734	69.2281		166.795	291.736	119.817		379.643	162.056	235.205
343.038	154.283	168.374		160.656	261.188	65.0555		342.985	294.145	71.7803		186.568	267.355	149.497		404.243	168.677	238.888
347.497	190.284	171.941		156.632	245.605	48.2277		322.878	290.45	45.9598		201.176	264.386	136.397		380.709	151.753	230.184
339.742	155.742	194.959		207.207	250.587	56.7658		326.182	298.73	50.8725		175.613	272.119	132.022		376.948	190.082	215.304
332.554	144.727	163.432		200.632	276.352	40.2403		319.917	302.951	61.3549		194.211	273.64	130.102		393.639	167.497	239.935
328.343	155.539	163.977		159.22	222.678	71.6327		320.506	297.51	70.9335		210.293	282.817	124.767		197.584	237.54	86.9252
341.917	177.644	175.209		153.377	223.849	71.8837		348.888	293.575	73.6302		206.94	278.519	123.43		189.209	244.831	86.9364
347.46	150.705	179.032		184.806	262.923	57.6222		304.824	293.02	69.0835		154.539	266.387	126.134		189.971	200.817	72.393
322.909	143.868	195.419		171.448	256.985	48.914		339.501	282.579	69.7533		178.307	276.119	127.945		190.639	237.456	87.4924
334.5	150.655	168.394		151.516	236.84	52.2413		306.605	306.541	54.1192		154.094	276.244	120.059		217.542	240.841	127.132
352.897	145.915	206.162		185.256	231.824	61.1121		321.629	293.888	64.2713		172.14	287.381	121.454		207.406	245.427	95.9238
352.987	148.262	200.05		163.746	251.778	61.5516		360.937	287.891	61.3889		188.361	279.408	137.03		206.45	243.694	129.723
338.775	170.096	205.853		199.029	251.441	56.7523		341.573	304.406	65.5234		180.937	285.596	119.822		221.858	242.545	114.346
351.406	182.801	175.818		197.686	255.534	52.1148		319.656	282.833	45.839		156.513	277.944	133.976		221.001	199.718	88.2202
326.693	163.967	153.882		197.995	237.431	48.5949		312.022	293.536	70.9021		164.899	290.408	125.618		216.78	238.31	96.723
335.837	165.813	185.458		203.254	273.786	61.5723		312.439	293.738	55.0108		179.581	283.318	134.088		193.906	251.32	129.958
333.549	145.375	182.941		214.269	247.262	48.5682		317.143	286.404	51.8984		155.444	268.454	130.663		208.233	246.169	108.907
341.728	163.301	163.697		171.353	225.178	57.5846		320.142	307.148	58.7675		148.422	287.297	135.749		222.175	249.849	124.265
325.046	158.616	153.793		153.623	251.871	65.585		324.718	303.282	57.3861		151	267.776	130.338		211.674	240.898	96.9632
332.135	181.559	172.21		196.943	242.124	40.6472		338.057	301.536	73.0307		166.727	269.858	134.264		194.46	242.504	88.1579
347.154	156.559	195.732		171.38	228.518	62.2083		313.077	282.129	65.609		149.971	288.359	118.122		206.388	232.793	130.677
163.423	216.436	196.684		168.676	248.446	57.6295		355.455	290.433	73.7293		211.751	245.097	138.491		202.944	248.998	97.1698
170.707	257.285	148.562		169.768	243.004	52.3663		322.731	289.515	69.9378		203.802	243.726	142.809		220.414	247.178	109.903
168.401	258.044	161.756		178.804	232.327	61.5623		336.654	284.399	47.4836		164.041	283.51	121.158		195.766	252.759	116.955
170.461	253.577	172.156		176.855	264.101	49.2855		360.737	281.633	57.8936		146.97	277.715	144.23		192.62	228.701	119.502
172.495	263.726	161.983		189.454	278.368	48.7904		353.382	294.094	69.4127		174.151	288.042	127.785		213.531	256.24	110.233
176.799	258.879	171.993		199.523	271.54	45.1312		333.94	287.216	55.1952		200.979	230.223	140.105		202.137	256.211	122.893
163.995	266.796	172.382		206.7	274.815	44.7369		305.494	289.244	47.8649		189.467	274.087	126.554		198.889	207.685	76.2014
173.143	213.231	186.515		190.302	235.11	57.8055		331.216	281.489	72.8748		153.78	266.337	138.143		205.057	242.86	119.368
163.605	254.227	185.566		213.862	221.883	52.3741		344.053	289.357	67.3835		353.286	180.772	83.5864		212.073	240.513	104.071
162.535	263.084	178.266		169.764	236.07	49.0081		343.962	285.641	72.6536		335.013	154.417	89.6142		217.127	252.332	114.274
191.032	245.766	169.199		175.698	240.653	48.6779		312.319	294.422	62.0505		299.803	153.224	83.8219		203.935	236.593	98.3619
182.801	253.192	172.787		206.179	246.254	40.2924		317.53	293.27	57.5849		350.531	194.846	82.605		212.755	250.105	117.116
173.582	257.049	169.006		216.677	238.686	52.8585		331.802	297.26	48.018		331.208	165.344	80.2516		203.852	238.567	123.75
171.169	253.043	178.181		205.148	223.029	44.4754		326.825	299.327	62.1074		322.223	157.766	97.6026		191.564	245.555	104.289
167.411	251.061	186.114		208.27	240.366	52.6563		312.891	299.9	55.8622		334.428	156.408	84.0672		205.243	248.787	127.609
170.342	271.171	153.166		172.719	272.373	40.9051		316.782	312.379	58.2767		334.751	158.762	98.1381		221.603	252.917	116.934
176.59	265.59	148.874		157.55	274.279	67.1411		311.393	314.219	57.5755		342.132	216.926	82.2737		228.322	256.989	117.39
167.59	246.771	186.576		200.786	247.613	62.7606		326.751	285.419	48.2396		350.121	163.595	98.5126		209.906	233.67	89.4309
165.321	271.983	152.953		190.682	248.861	62.0333		308.387	283.814	69.6797		325.673	158.252	85.4742		222.685	238.341	98.5596
165.022	275.665	152.997		186.434	253.96	57.8315		305.666	297.687	59.7451		350.715	166.117	93.7309		224.332	251.992	110.633
169.879	274.591	146.966		179.522	252.568	53.2268		325.867	304.559	73.2468		327.314	155.258	91.3323		204.617	200.297	78.0057
194.902	252.627	157.844		187.29	224.385	40.7825		298.218	293.081	69.2742		344.944	207.164	84.26		214.757	239.271	130.191
186.865	248.387	170.082		199.437	254.761	67.0109		329.768	291.636	63.1215		331.417	152.83	86.4826		200.012	231.836	128.258
166.144	259.31	180.812		211.907	246.206	40.5059		337.355	292.381	62.1317		331.878	153.012	105.397		195.833	236.148	119.716
180.929	259.005	147.844		216.722	277.383	44.7962		328.921	297.657	55.5075		350.078	165.07	81.9899		211.548	242.859	130.582
170.545	262.205	147.484		202.529	245.227	58.7652		357.669	289.918	67.6005		340.891	157.733	80.8163		187.89	252.206	104.777
170.358	268.086	149.599		163.659	246.872	58.1412		359.041	302.581	74.1821		348.543	219.416	91.4628		217.928	246.704	114.355
168.887	263.572	174.771		165.765	223.383	62.2217		307.053	299.677	69.656		344.174	154.44	105.624		214.68	243.945	117.181
180.355	273.208	149.596		177.346	247.572	53.3086		333.85	295.253	57.7244		345.838	217.298	87.2371		210.641	248.324	111.161
168.82	255.292	180.318		163.516	231.83	45.7911		334.112	291.68	52.2386		349.906	157.622	84.034		226.685	251.838	119.413
167.583	259.967	154.283		189.139	283.97	67.8293		318.215	310.052	71.8644		350.691	157.03	96.0957		223.575	257.704	117.135
171.052	268.663	166.561		205.451	259.085	57.5005		335.383	288.935	73.0099		308.595	158.799	104.962		192.299	232.142	128.549
187.381	241.709	173.93		160.742	225.643	67.4577		315.21	288.714	72.9065		305.129	153.378	109.1		191.496	235.186	114.439
192.658	261.949	146.073		186.299	259.343	53.5273		337.742	298.912	52.6937		314.834	156.384	109.162		192.075	231.101	80.0284
169.934	261.948	167.546		177.955	226.306	41.2473		355.553	284.121	55.9207		346.309	163.385	86.3358		198.705	238.16	99.3579
184.27	264.046	163.388		160.306	234.856	62.7504		327.841	302.481	52.3315		339.973	157.043	88.9873		193.715	237.984	106.739
169.128	252.444	148.668		165.318	241.179	62.5627		301.71	303.763	60.3577		324.269	152.864	102.058		200.586	237.431	111.6
194.905	215.168	167.925		201.248	235.023	58.6958		341.665	287.546	49.0885		345.693	153.416	99.0083		205.717	238.556	90.3778
165.572	261.085	147.731		156.019	236.273	58.026		314.175	285.668	61.9268		343.295	192.038	84.3144		203.488	237.373	128.68
180.174	214.282	182.365		214.816	269.164	49.2853		345.443	281.66	65.8758		353.957	153.877	100.397		198.859	228.684	120.623
166.12	254.633	154.762		181.479	247.271	58.206		341.611	293.153	49.1882		315.145	160.051	86.908		195.733	230.749	115.278
165.269	255.92	169.442		182.373	231.747	41.7521		328.299	293.812	48.712		330.197	160.566	106.112		194.11	244.04	128.478
172.041	258.402	176.246		211.606	229.705	53.2079		307.467	288.207	65.8634		325.984	159.163	96.2364		199.785	241.196	90.8824
167.461	241.287	189.57		184.438	262.134	45.999		321.767	304.932	48.5678		318.98	156.109	99.1231		206.764	240.26	100.516
177.078	263.753	168.296		182.665	237.753	50.3531		332.28	305.186	53.1978		314.643	152.404	102.004		188.621	244.085	112.179
162.884	267.309	163.905		201.904	244.938	53.9288		337.479	290.695	67.0934		337.349	166.604	82.1091		191.033	251.037	100.665
166.165	271.853	163.787		157.652	250.053	54.0028		321.193	289.843	53.4685		290.767	160.161	83.3362		191.615	238.864	91.6928
187.528	253.014	168.268		205.403	249.629	49.6617		314.705	282.169	56.2836		355.003	214.63	85.4027		193.539	246.264	120.852
180.929	275.311	155.859		194.74	245.379	62.2823		308.987	306.33	64.2346		346.299	158.647	102.57		197.646	232.057	82.656
182.326	259.849	168.485		219.527	238.677	45.6082		310.415	304.507	58.5215		301.031	154.684	91.6457		189.226	251.734	118.021
162.05	250.163	190.426		202.294	254.555	45.8987		330.765	288.848	49.6624		349.557	157.998	110.165		191.12	245.872	91.6475
175.305	259.669	164.303		199.536	237.541	53.8468		315.461	306.96	62.4707		353.377	159.427	92.0393		226.6	245.515	107.008
164.881	245.89	190.492		151.991	276.598	63.1738		350.787	313.731	62.1252		337.595	157.97	93.0149		226.018	246.958	111.839
179.069	230.486	183.413		183.36	283.008	69.0327		314.302	303.833	69.1487		327.47	158.19	110.049		204.118	248.94	112.126
166.943	266.954	160.343		174.224	231.814	42.004		343.192	300.176	69.71		306.787	161.325	109.754		216.288	240.279	101.357
167.996	263.401	163.851		193.861	248.987	54.4649		304.562	306.102	71.7822		327.349	155.915	99.7948		200.419	241.795	101.036
165.725	256.639	176.025		173.027	241.54	42.5477		345.713	288.643	53.2956		348.62	156.07	90.2805		187.624	240.199	82.9519
187.211	258.588	160.755		342.112	156.381	255.683		332.117	284.126	68.1335		349.593	177.392	85.9398		208.758	240.938	106.819
175.976	252.364	176.568		328.443	196.656	248.881		202.466	257.502	123.799		321.136	156.051	110.175		200.138	236.222	125.162
175.007	272.222	155.706		342.677	171.53	235.06		166.112	270.348	153.387		333.936	162.712	91.5737		214.923	245.843	107.468
191.592	256.022	161.534		348.065	166.417	256.721		178.881	266.757	120.514		340.67	166.037	90.7396		192.683	236.564	83.3685
167.432	265.192	151.05		349.96	155.94	240.951		170.988	253.61	150.556		298.491	159.605	87.1565		195.312	245.491	101.406
175.577	272.318	145.978		345.817	166.714	245.179		212.122	265.782	138.695		335.904	162.966	87.3995		208.546	244.973	116.055
180.231	248.566	176.889		345.319	165.393	240.485		201.941	251.891	144.144		355.852	162.584	95.7671		189.351	251.56	112.524
191.623	257.532	151.596		356.787	151.004	253.324		152.076	250.876	119.623		339.138	160	100.055		219.184	257.053	112.535
189.801	256.016	156.583		322.086	168.795	230.779		207.382	247.833	150.166		314.145	165.943	82.6794		193.671	250.549	125.831
179.635	271.05	161.495		360.462	166.207	248.562		175.299	259.238	139.102		342.278	168.581	82.6334		208.659	238.574	131.845
333.06	189.055	39.4923		335.769	161.828	252.781		152.233	266.026	138.989		353.749	188.239	82.2366		189.605	248.913	129.193
345.033	171.553	32.8233		330.466	154.817	241.132		187.732	262.756	143.86		326.486	164.164	80.8638		190.604	248.094	108.464
349.66	195.657	27.3125		340.383	155.526	240.579		211.504	248.506	144.899		349.535	164.664	111.107		223.859	241.139	102.327
345.896	150.229	51.5646		347.436	179.296	241.649		178.222	253.66	145.028		301.552	158.029	106.623		190.872	240.641	131.375
331.793	152.092	27.6519		337.432	166.249	245.764		191.675	254.974	150.68		338.276	157.269	107.101		208.162	254.602	128.496
343.589	204.299	39.718		366.645	208.554	229.395		149.863	260.998	120.219		344.679	156.763	85.9385		197.344	240.867	115.873
337.596	169.012	45.3582		360.945	152.541	249.767		199.671	252.042	132.098		345.553	198.474	81.5225		203.127	237.035	118.699
330.988	177.055	21.4824		366.52	157.497	253.14		175.012	271.547	130.969		338.847	200.612	81.1269		222.306	241.715	108.328
340.313	200.113	30.3453		347.238	171.741	230.255		217.834	257.382	139.744		304.939	159.29	88.9529		221.807	240.031	125.899
334.393	171.813	25.0069		337.143	164.13	249.397		199.191	257.217	145.6		298.687	158.216	110.896		193.624	240.739	102.193
325.84	175.972	12.3551		345.8	157.602	245.542		154.966	236.651	151.261		346.228	162.037	91.1274		190.308	242.34	118.352
346.632	167.112	37.3522		343.484	170.021	242.345		200.13	253.467	151.096		342.787	170.875	86.8944		188.799	254.679	108.389
332.266	203.865	51.6605		303.097	175.917	230.143		176.851	259.167	125.964		348.605	187.456	83.8337		201.338	246.236	129.266
325.713	160.189	27.5381		346.076	157.343	235.704		174.405	272.952	125.19		333.592	158.754	111.071		194.159	225.387	130.205
346.633	195.523	32.8098		335.633	169.296	257.165		167.371	265.902	150.232		350.035	211.821	81.6708		189.408	230.129	115.919
339.627	181.965	25.1379		363.613	180.563	230.373		208.094	268.715	140.093		352.47	162.048	103.852		218.849	252.821	108.871
330.542	204.661	35.0963		351.122	167.797	245.894		206.327	265.173	126.146		332.044	217.318	81.3606		208.256	227.054	85.2196
340.309	174.718	28.4741		340.689	166.51	226.249		170.771	261.969	146.012		352.883	165.292	87.8951		188.121	226.12	118.486
347.713	145.956	43.2582		325.135	156.788	246.231		175.048	265.73	145.919		350.224	207.398	89.7802		189.06	255.91	102.735
345.152	180.034	28.0566		345.167	178.76	231.101		195.306	262.138	140.729		321.28	153.918	82.5233		195.331	236.762	129.889
347.01	185.367	37.2951		344.451	170.545	247.015		207.697	259.066	126.391		308.964	155.229	92.4947		195.588	246.666	113.258
329.315	146.806	51.4015		337.302	165.991	237.09		200.419	257.025	133.528		313.603	154.487	92.9024		189.846	239.056	121.965
329.655	167.159	14.2542		301.797	173.601	236.366		215.907	262.427	140.865		352.27	216.703	89.9132		194.819	239.579	126.417
341.285	192.225	45.6538		352.616	160.795	248.879		187.9	254.224	134.664		355.046	157.062	82.4974		221.112	248.197	118.434
343.331	204.385	27.9085		327.974	168.416	226.93		213.862	256.226	134.356		343.241	155.822	95.5632		223.615	244.955	103.117
331.961	146.368	25.5034		360.458	171.628	242.064		173.011	264.416	151.833		345.401	153.554	91.6773		226.984	255.811	113.032
347.352	154.964	25.0964		339.712	166.92	257.679		218.794	264.749	126.006		164.556	247.403	66.2013		201.195	221.436	168.939
340.285	153.948	26.1115		345.645	176.057	226.777		197.343	257.527	141.142		167.755	281.105	69.2992		186.81	201.024	171.793
352.653	175.328	43.0044		324.59	195.822	246.371		183.325	248.964	147.646		199.497	250.291	63.466		189.697	202.783	163.8
331.616	173.46	14.6203		345.38	158.716	241.582		150.838	223.976	122.199		195.363	275.392	43.1378		201.427	199.634	160.889
329.201	179.45	48.6543		352.024	156.266	237.229		170.085	262.635	135.296		181.37	278.158	50.5194		201.804	204.91	144.422
330.79	156.501	32.8428		330.646	167.025	237.678		206.501	253.568	135.395		192.862	284.967	53.8986		224.263	248.221	170.859
340.257	156.954	32.1811		360.163	158.926	254.019		217.216	246.759	147.662		179.972	282.821	71.2408		207.452	232.628	175.234
340.45	183.934	43.3276		330.934	163.357	255.57		181.204	258.429	121.898		177.651	248.739	73.7412		227.279	216.939	191.041
345.312	185.689	43.9178		321.416	171.162	237.853		153.002	231.523	152.009		212.38	252.111	50.7911		205.936	250.98	140.021
345.199	151.211	41.348		340.169	177.195	242.621		178.628	252.236	152.567		204.845	246.449	53.6875		216.112	226.042	179.22
332.962	169.986	33.0611		357.415	201.956	241.68		202.874	267.334	141.593		169.4	244.739	70.408		213.839	220.75	144.733
329.645	161.359	31.6557		363.721	160.02	254.141		155.107	271.714	127.639		207.22	240.758	47.1213		191.346	234.649	169.099
343.755	188.437	25.4509		337.694	190.686	226.665		216.537	253.038	141.592		181.607	262.6	47.8569		209.552	221.075	163.45
345.628	190.614	21.6184		346.047	168.01	238.56		211.642	237.954	152.684		197.007	255.052	53.8165		206.247	244.689	174.547
336.661	144.773	58.0487		333.367	175.582	238.424		159.464	263.933	147.946		193.845	252.774	70.384		219.126	233.224	179.516
330.401	201.852	46.5401		340.063	169.909	247.96		194.783	265.486	136.032		156.294	233.624	72.2166		191.945	231.719	147.184
323.672	162.361	37.6554		339.556	180.372	227.522		151.583	259.1	148.697		208.778	249.612	54.8406		193.713	257.623	151.532
328.652	198.889	35.1929		364.223	161.105	250.101		204.169	261.149	148.416		187.865	234.895	71.5338		224.422	249.43	189.991
326.116	143.606	52.2463		355.049	156.814	245.441		175.481	249.985	148.93		206.155	273.371	52.9561		219.912	253.044	168.993
325.933	167.559	41.3017		342.369	161.64	243.252		173.662	263.885	122.949		197.154	236.058	72.0557		228.145	227.369	173.581
343.512	200.066	22.1688		341.27	160.346	247.315		175.346	258.758	148.638		202.117	238.799	66.2566		192.056	242.998	183.384
334.875	186.643	33.445		332.015	178.166	232.494		206.989	258.876	142.441		199.012	274.946	50.1112		196.476	205.115	152.796
328.438	205.493	39.6743		351.939	184.181	242.189		182.601	252.473	129.107		157.014	279.274	73.255		221.135	251.571	163.098
327.877	182.377	31.1861		326.573	199.898	242.627		154.176	241.924	153.184		198.447	246.549	72.1609		208.258	203.962	155.528
321.74	180.381	16.2923		343.629	162.922	232.68		158.317	248.608	152.644		184.104	232.288	70.698		224.841	201.436	191.121
336.884	176.19	21.9205		364.882	175.768	227.988		177.186	266.356	135.907		189.021	271.608	66.5405		214.862	220.783	170.75
342.975	182.766	16.031		345.014	167.577	255.533		188.28	249.215	130.295		180.675	284.031	57.1889		218.028	210.984	165.721
342.992	174.352	45.0528		327.853	189.041	255.354		209.459	256.027	129.493		198.592	283.829	64.5674		223.686	256.174	162.642
323.93	198.388	22.4928		309.465	167.862	242.782		205.793	252.422	149.566		168.311	293.186	57.1004		205.397	223.911	140.554
333.42	166.604	46.7061		344.155	167.808	250.663		179.486	265.106	129.209		180.02	232.493	64.2539		212.396	217.638	154.717
354	197.923	38.33		354.248	166.968	239.083		159.829	268.642	122.901		178.414	253.617	53.8126		222.046	258.073	167.194
327.942	151.951	22.5124		333.28	170.187	228.269		209.307	253.421	142.837		205.838	247.973	62.8728		215.675	226.964	191.751
339.217	198.206	39.0095		366.779	149.041	246.751		156.425	272.425	137.191		177.725	241.467	55.5763		196.309	201.302	161.309
332.928	180.237	25.7587		328.392	188.927	239.197		163.301	260.044	148.538		182.722	246.408	55.6312		189.603	216.123	144.516
337.972	166.864	39.7852		302.78	180.021	228.531		181.04	252.501	123.449		202.27	295.401	47.0131		227.469	232.784	191.198
341.515	146.352	52.2353		355.809	161.637	251.731		177.505	263.885	149.446		176.52	233.446	70.8279		225.603	234.304	165.359
352.286	186.177	35.575		348.922	152.513	255.757		214.566	261.614	129.487		172.432	253.615	57.2201		197.174	205.554	158.644
329.668	179.565	16.963		329.779	197.442	242.524		155.774	263.131	123.732		170.775	251.24	66.8285		194.738	241.438	152.914
327.407	193.227	45.7557		351.146	164.701	248.998		188.191	263.978	136.655		194.39	276.121	61.851		202.843	213.907	147.53
335.866	164.381	31.6365		346.033	154.371	228.882		68.5919	155.294	201.495		154.966	276.045	44.1528		218.288	241.948	171.129
337.798	188.477	29.387		366.051	167.647	248.337		51.9517	185.965	218.971		206.413	256.47	47.9865		200.479	209.108	149.391
351.17	147.482	59.7162		340.862	149.443	239.217		62.6018	202.451	210.31		162.25	256.221	51.3757		206.247	230.266	144.865
341.249	205.813	17.3461		349.14	178.33	228.896		53.311	196.659	219.013		198.941	260.634	48.6292		189.073	249.72	140.229
328.022	184.555	42.9185		346.722	152.334	239.834		59.3268	199.839	225.415		200.906	293.404	69.0289		224.679	209.6	173.068
326.25	197.925	39.8263		365.883	154.518	256.737		64.5034	202.762	219.33		210.042	230.089	68.3126		227.333	250.102	165.277
350.087	204.742	39.7684		362.611	200.158	246.676		62.2983	203.776	213.891		197.999	237.06	44.1771		206.477	208.796	162.839
344.628	176.538	33.25		331.309	182.577	233.754		65.7858	202.61	229.986		202.403	272.104	48.451		192.507	253.149	139.784
333.538	177.273	41.6928		337.718	169.069	253.59		41.5907	150.19	213.517		197.462	241.112	72.602		201.955	222.812	150.034
348.642	179.915	22.4807		367.421	182.492	234.661		42.1687	165.23	225.456		204.62	228.368	64.2302		219.458	218.256	163.091
329.146	169.482	45.125		349.162	151.206	235.324		58.0581	204.828	205.83		191.733	257.441	71.2062		210.73	213.944	155.091
341.318	189.606	39.149		347.041	154.042	251.38		60.0313	196.665	228.999		211.905	288.535	60.4016		197.636	206.65	140.628
322.479	142.911	61.6369		342.174	160.235	252.64		47.1052	197.961	225.763		203.818	277.07	57.5982		199.083	249.356	146.898
347.178	190.258	28.9634		353.424	160.675	240.134		62.0765	145.933	206.493		171.184	264.994	71.2308		213.786	209.275	152.541
321.537	204.637	22.8642		332.83	200.23	234.528		48.0179	202.814	229.023		183.751	269.391	70.5005		202.696	220.856	155.264
331.006	177.435	36.2547		313.365	170.093	243.372		41.2807	179.94	221.951		210.326	231.086	61.7539		192.09	257.362	144.854
336.251	195.799	26.7578		348.494	167.205	253.55		43.2219	191.094	218.636		212.488	241.83	64.5747		212.293	238.834	173.55
326.385	176.109	47.4247		327.881	184.714	243.736		34.6861	145.866	225.754		177.837	272.683	70.579		194.171	241.331	163.385
322.53	160.407	31.6519		362.221	193.709	243.516		61.682	176.534	206.361		205.92	270.258	44.1779		199.437	243.108	173.125
327.995	155.109	49.9385		351.069	168.508	229.93		38.956	178.211	225.763		181.46	260.925	72.8595		197.519	220.969	158.417
332.965	181.966	47.0414		335.466	174.808	229.524		58.6554	155.271	208.664		206.786	288.005	57.8177		197.759	232.98	142.839
327.291	170.961	31.3762		327.065	150.676	248.457		42.901	193.738	225.595		184.545	237.42	67.0516		192.003	209.016	145.346
342.154	183.184	47.9508		329.165	160.506	235.028		66.1464	194.951	206.939		171.118	271.821	68.4906		209.179	247.552	158.378
321.813	202.137	18.2767		353.411	165.012	244.038		58.5556	193.405	199.451		197.757	227.447	70.6388		215.644	223.013	165.822
334.143	179.798	32.5313		365.602	174.516	235.21		50.0002	160.087	219.349		199.712	245.307	60.249		208.952	222.602	144.762
352.118	150.437	29.186		24.7704	182.868	207.254		45.544	156.487	213.926		190.798	230.411	71.2014		203.309	230.824	140.471
332.36	158.15	42.2854		40.4547	181.084	191.99		60.457	170.286	216.462		170.476	249.595	60.5299		221.13	219.229	191.764
347.68	177.66	40.2952		23.0555	161.203	212.257		60.3255	183.031	216.652		174.553	238.075	71.5131		213.538	232.149	140.575
342.541	206.401	23.502		29.1599	177.31	204.839		56.6216	181.128	213.896		176.751	231.336	57.7319		195.65	213.326	147.742
329.651	159.684	26.1043		48.826	157.196	196.58		66.958	189.206	211.382		174.335	256.381	62.002		226.012	201.64	173.253
341.527	206.769	47.2547		31.5187	203.261	204.593		59.1594	196.933	216.459		212.102	235.153	68.8349		206.228	219.474	147.082
352.418	183.589	43.9667		53.0127	202.717	204.349		35.6946	184.386	229.885		174.168	227.859	64.9599		219.62	203.865	196.485
324.736	171.274	36.4013		28.3888	189.955	212.513		65.4993	198.531	208.27		178	268.003	66.2784		219.918	201.469	164.472
332.001	161.22	18.9276		37.0877	198.507	206.534		67.2549	175.046	206.47		176.064	255.663	69.1205		207.543	227.399	161.433
325.394	166.383	18.8264		57.8743	205.912	214.973		40.3863	185.324	226.328		185.703	252.151	57.4204		204.685	209.571	155.144
333.788	200.143	40.6316		37.4489	196.133	212.566		58.6182	200.802	218.876		175.502	243.578	73.032		200.262	248.104	140.57
321.018	168.204	19.3921		28.7391	198.693	212.594		50.806	193.136	226.501		197.182	273.896	56.0207		227.895	212.379	175.76
341.481	162.555	47.8279		48.5436	150.34	194.064		55.2472	189.971	222.114		209.231	234.741	52.3315		196.705	246.627	164.737
343.224	194.512	26.5844		47.9767	195.744	191.871		62.9383	177.935	199.098		175.755	278.461	70.6473		190.899	248.361	165.613
341.476	191.185	18.8543		37.8348	163.616	194.356		54.7933	185.113	206.978		178.514	236.192	52.2492		202.973	209.829	159.501
[truncated: 9,364 more rows]

## Sheet: SytG4_female
SytG4_1				SytG4_2				SytG4_3				SytG4_4				SytG4_5
[truncated: 10,746 more rows]

[truncated: 5 more sheets: SytG4_male, nSybG4_female, nSybG4_male, RepoG4_female, RepoG4_male]
